# Supplementary material for: Dehydrocoupling of phosphine–boranes using the [RhCp*Me(PMe3)(CH2Cl2)][BArF4] precatalyst: stoichiometric and catalytic studies
Source: PubMed Central journal article supplement (PMC6003611; doi:10.1039/c5sc04150c), 2015-12-21
Supplement: SC-007-C5SC04150C-s002.pdf [file SC-007-C5SC04150C-s002.pdf]

**Supporting Information for:**

**Dehydrocoupling of Phosphine-Boranes Using  $\{\text{RhCp}^*(\text{PR}_3)\}^{2+}$ .  
Stoichiometric Reactivity and Catalytic Studies**

T.N. Hooper,<sup>a</sup> A.S. Weller,<sup>\*a</sup> N.A. Beattie<sup>b</sup> and S.A. Macgregor<sup>b</sup>

*a) Department of Chemistry, Inorganic Chemistry Laboratory, University of Oxford, Oxford, OX1 6QR, UK.*

*b) School of Chemical Sciences, Heriot Watt University, Edinburgh, EH14 4AS, UK.*

|                                                              |             |
|--------------------------------------------------------------|-------------|
| General Experimental                                         | <b>S-2</b>  |
| Catalytic Reactions                                          | <b>S-2</b>  |
| Synthesis and Characterisation of New Compounds              | <b>S-4</b>  |
| Crystallography                                              | <b>S-9</b>  |
| Selected Spectra                                             | <b>S-12</b> |
| Experimental References                                      | <b>S-29</b> |
| Computational Details                                        | <b>S-30</b> |
| Computational References                                     | <b>S-30</b> |
| Breakdown of Energy Contributions                            | <b>S-31</b> |
| Functional Testing on <b>11</b> and its Isomers              | <b>S-35</b> |
| Computed <sup>11</sup> B Chemical Shifts                     | <b>S-36</b> |
| Cartesian Coordinates and Energies for all Stationary Points | <b>S-37</b> |

## General Experimental

All manipulations, unless otherwise stated, were performed under an atmosphere of argon, using standard Schlenk and glove-box techniques. Glassware was oven dried at 130 °C overnight and flamed under vacuum prior to use. Dichloromethane, hexane and pentane were dried using a Grubbs type solvent purification system (MBraun SPS-800) and degassed by successive freeze-pump-thaw cycles.<sup>1</sup> CD<sub>2</sub>Cl<sub>2</sub> was distilled under vacuum from CaH<sub>2</sub> and stored over 3 Å molecular sieves. NMR spectra were recorded on a Bruker AVD 500 MHz spectrometer at room temperature unless otherwise stated. <sup>31</sup>P and <sup>11</sup>B NMR spectra were referenced against 85% H<sub>3</sub>PO<sub>4</sub> (external) and Et<sub>2</sub>O·BF<sub>3</sub> (external) respectively. Chemical shifts are quoted in ppm and coupling constants in Hz. ESI-MS were recorded on a Bruker MicrOTOF instrument. In all ESI-MS spectra there was a good fit to both the principal molecular ion and the overall isotopic distribution.

Gel permeation chromatography (GPC) was performed in collaboration with Dr T. Jurca and Prof. Ian Manners (University of Bristol) on a Viscotek RImax chromatograph, equipped with an automatic sampler, a pump, an injector and inline degasser. The columns were contained within an oven (35 °C) and consisted of styrene/divinyl benzene gels with pore sizes ranging from 500 Å to 100,000 Å. THF containing 1 % w/w [<sup>n</sup>Bu<sub>4</sub>N]Br and 1% v/v toluene was used as the eluent at a flow rate of 1.0 cm<sup>3</sup> min<sup>-1</sup>. All samples analysed by GPC were dissolved in the eluent (2.5 and 5 mg cm<sup>-3</sup>), stirred for 1 h at room temperature and passed through a membrane filter (200 nm pores) before analysis. The calibration was conducted using a series of monodisperse polystyrene standards obtained from Sigma-Aldrich.

H<sub>3</sub>B·PPh<sub>2</sub>H and H<sub>3</sub>B·P<sup>t</sup>Bu<sub>2</sub>H were purchased from Sigma-Aldrich and used without further purification. All other phosphine-boranes were synthesised from the parent phosphine and BH<sub>3</sub>·THF using the same method as described for H<sub>3</sub>B·PMe<sub>3</sub>.<sup>2</sup> [RhCp\*Me(PMe<sub>3</sub>)(CH<sub>2</sub>Cl<sub>2</sub>)] [BAR<sup>F</sup><sub>4</sub>] (**1**) was synthesised in a slight adaptation of the method described by Taw *et al.*<sup>3</sup> In a typical experiment [RhCp\*(Cl)(Me)(PMe<sub>3</sub>)] (50.0 mg, 0.137 mmol) and Na[BAR<sup>F</sup><sub>4</sub>] (121.5 mg, 0.137 mmol) were added to a Schlenk flask which was cooled in an ice bath. CH<sub>2</sub>Cl<sub>2</sub> (10 cm<sup>3</sup>) was added and the solution stirred for 30 minutes. The red solution was filtered to remove NaCl and the filtrate concentrated *in vacuo* to approximately 3 cm<sup>3</sup>. The solution was carefully layered with pentane and stored at -18 °C overnight to form red crystalline material (**1**). The mother liquor was removed by cannula and the solid washed with pentane. The material was dried *in vacuo* for 10 minutes (the material darkened during this time) and isolated in the glove box (148 mg, 85%). The NMR spectra of the material matched that reported previously<sup>3</sup> and the solid was stored in the glove box freezer (-26 °C).

## Catalytic Reactions

### Catalytic Dehydrocoupling of H<sub>3</sub>B·PPhH<sub>2</sub> to form [H<sub>2</sub>BPPH]<sub>n</sub>

In a typical experiment, H<sub>3</sub>B·PPhH<sub>2</sub> (1.0 cm<sup>3</sup>, 1.0 M solution in toluene, 1.0 mmol) was added to a long thin Young's tube containing a stirrer bar and [RhCp\*Me(PMe<sub>3</sub>)(CH<sub>2</sub>Cl<sub>2</sub>)] [BAR<sup>F</sup><sub>4</sub>] (**1**) (1 mol%, 12.8 mg, 0.01 mmol). The solid was dissolved to form a yellow solution. The solution was placed in an oil bath preheated to 100

°C and stirred for 72 h, with the tap open to a slow flow of argon. At the end of the reaction the solution was cooled and added by cannula to stirred hexane (100 cm<sup>3</sup>) and a precipitate formed. The solvent was removed by filter cannula and the resulting polymer dried *in vacuo* to yield a pale yellow solid (26 mg).

<sup>1</sup>H NMR (500 MHz, CDCl<sub>3</sub>): δ 7.22 (br, Ar-H), 7.11 (br, Ar-H), 4.30 (br d, <sup>1</sup>J<sub>HP</sub> = 346 Hz, [H<sub>2</sub>BPPPhH]<sub>n</sub>), 1.50 (v br, [H<sub>2</sub>BPPPhH]<sub>n</sub>).

<sup>31</sup>P{<sup>1</sup>H} NMR (202 MHz, CDCl<sub>3</sub>): δ -49.5 (br, [H<sub>2</sub>BPPPhH]<sub>n</sub>).

<sup>31</sup>P NMR (202 MHz, CDCl<sub>3</sub>): δ -49.5 (br d, <sup>1</sup>J<sub>PH</sub> = 346 Hz, [H<sub>2</sub>BPPPhH]<sub>n</sub>).

<sup>11</sup>B{<sup>1</sup>H} NMR (160 MHz, CDCl<sub>3</sub>): δ -34.0 (v br, [H<sub>2</sub>BPPPhH]<sub>n</sub>).

Signals for the [BAR<sup>F</sup><sub>4</sub>]<sup>-</sup> ion are visible in the <sup>1</sup>H and <sup>11</sup>B{<sup>1</sup>H} NMR spectra originating from the precatalyst.

**Table S1:** GPC data for polymer samples prepared as above with catalyst (1) loadings of 1 and 5 mol%. The GPC data was measured at 2 polymer concentrations in THF solution.

| Sample            | Conc. (mg cm <sup>-3</sup> ) | Component                       | M <sub>n</sub> | M <sub>w</sub> | PDI  |
|-------------------|------------------------------|---------------------------------|----------------|----------------|------|
| 1 mol% 1,<br>72 h | 2.5                          | Overall                         | 1 200          | 24 00          | 20.4 |
|                   |                              | High molecular mass             | 15 000         | 33 000         | 2.2  |
|                   |                              | <sup>a</sup> Low molecular mass | 300            | 700            | 2.2  |
|                   | <sup>b</sup> 5.0             | Overall                         | 1 400          | 16 000         | 6.6  |
| 5 mol% 1,<br>72 h | 2.5                          | Overall                         | 1 800          | 10 000         | 5.7  |
|                   |                              | High molecular mass             | 13 000         | 19 000         | 1.5  |
|                   |                              | <sup>a</sup> Low molecular mass | 900            | 1 500          | 1.7  |
|                   | 5                            | Overall                         | 1 700          | 6 500          | 3.9  |
|                   |                              | High molecular mass             | 6 500          | 11 000         | 1.7  |
|                   |                              | <sup>a</sup> Low molecular mass | 900            | 1 300          | 1.5  |

<sup>a</sup> These values are below the GPC detection limit, so they have little value other than to reinforce that there is a reasonably high amount of low molecular mass product in the sample.

<sup>b</sup> For this sample, there was significant overlap between the low and high molecular mass components, and no clear distinction could be made.

See figures S2-5 for polymer NMR spectroscopy, ESI-MS and GPC data.

### H<sub>3</sub>B·PPhHBH<sub>2</sub>·PPhH<sub>2</sub> (2)

A toluene solution of H<sub>3</sub>B·PPhH<sub>2</sub> (0.50 cm<sup>3</sup>, 1.0 M solution, 0.50 mmol) was transferred by cannula to a long, thin schlenk tube containing a small stirrer bar and [RhCp\*Me(PMe<sub>3</sub>)(CH<sub>2</sub>Cl<sub>2</sub>)] [BAR<sup>F</sup><sub>4</sub>] (1) (31.9 mg, 0.025 mmol, 5 mol%). Stirring dissolved the solid and formed a yellow solution and the portion of the tube containing solvent was placed in an oil bath preheated to 100 °C. After 1 h, the solution was cooled and the solvent removed *in vacuo*. Hexane (5 cm<sup>3</sup>) was added with vigorous stirring and sonication, then the solvent was again evaporated to dryness to remove any traces of toluene. Hexane (20 cm<sup>3</sup>) was added and the solution stirred vigorously to give a pale, almost colourless solution and a

yellow oil. The supernatant was carefully transferred by filter cannula to another schlenk tube, ensuring no yellow oil was transferred. The solvent was removed *in vacuo* to produce a pale yellow oil. A cold finger was introduced into the schlenk and this was cooled to -78 °C. The product was carefully heated (to approx. 50 °C) to remove traces of H<sub>3</sub>B·PPhH<sub>2</sub> which sublimed onto the cold finger. Pure H<sub>3</sub>B·PPhHBH<sub>2</sub>·PPhH<sub>2</sub> was left in the schlenk tube as an oil and could be dissolved to form a standard solution for use.

**<sup>1</sup>H NMR (500 MHz, CD<sub>2</sub>Cl<sub>2</sub>):** δ 7.66 (m, 5 H, Ar-H), 7.49 (m, 2 H, Ar-H), 7.37 (m, 3 H, Ar-H), 5.85 (dm, <sup>1</sup>J<sub>HP</sub> = 405.6 Hz, 2 H, H<sub>3</sub>B·PPhBH<sub>2</sub>·PH<sub>2</sub>Ph), 4.79 (dm, <sup>1</sup>J<sub>HP</sub> = 343.3 Hz, 1 H, H<sub>3</sub>B·PPhBH<sub>2</sub>·PH<sub>2</sub>Ph), 1.79 (v br m, 2 H, H<sub>3</sub>B·PPhBH<sub>2</sub>·PH<sub>2</sub>Ph), 0.72 (br m, 3 H, H<sub>3</sub>B·PPhBH<sub>2</sub>·PH<sub>2</sub>Ph).

**<sup>31</sup>P{<sup>1</sup>H} NMR (202 MHz, CD<sub>2</sub>Cl<sub>2</sub>):** δ -51.4 (br, H<sub>3</sub>B·PPhBH<sub>2</sub>·PH<sub>2</sub>Ph), -53.4 (br, H<sub>3</sub>B·PPhBH<sub>2</sub>·PH<sub>2</sub>Ph).

**<sup>11</sup>B{<sup>1</sup>H} NMR (160 MHz, CD<sub>2</sub>Cl<sub>2</sub>):** δ -36.5 (vt, <sup>1</sup>J<sub>BP</sub> ≈ 70 Hz, H<sub>3</sub>B·PPhBH<sub>2</sub>·PH<sub>2</sub>Ph), -38.9 (d, <sup>1</sup>J<sub>BP</sub> ≈ 50 Hz, H<sub>3</sub>B·PPhBH<sub>2</sub>·PH<sub>2</sub>Ph).

See figure S6 NMR spectroscopy data and figure S7 for detection of **2** during catalysis.

### Catalytic Dehydrocoupling of H<sub>3</sub>B·PPh<sub>2</sub>H to form H<sub>3</sub>B·PPh<sub>2</sub>BH<sub>2</sub>·PPh<sub>2</sub>H

In a typical experiment [RhCp\*Me(PMe<sub>3</sub>)(CH<sub>2</sub>Cl<sub>2</sub>)] [BAr<sup>F</sup><sub>4</sub>] (8.0 mg, 0.0063 mmol) and H<sub>3</sub>B·PPh<sub>2</sub>H (25.0 mg, 0.125 mmol) were added to a high pressure NMR tube. Toluene (0.2 cm<sup>3</sup>) was added and the tube shaken to dissolve the solids and form a yellow solution. The tube was placed in an oil bath preheated to 100 °C for the prescribed period of time. Before the NMR spectra were taken a further 0.2 cm<sup>3</sup> of toluene was added to the tube to ensure all compounds were in solution at room temperature.

See figure S9 NMR spectroscopy data and figure S10 for mercury poisoning experiment showing catalysis to be homogeneous.

## Synthesis and Characterisation of New Compounds

### [RhCp\*(PPh<sub>2</sub>·BH<sub>3</sub>)(PMe<sub>3</sub>)] [BAr<sup>F</sup><sub>4</sub>] (**6**)

A solution of H<sub>3</sub>B·PPh<sub>2</sub>H (4.7 mg, 0.0235 mmol) in CH<sub>2</sub>Cl<sub>2</sub> (2 cm<sup>3</sup>) was added to [RhCp\*Me(PMe<sub>3</sub>)(CH<sub>2</sub>Cl<sub>2</sub>)] [BAr<sup>F</sup><sub>4</sub>] (30.0 mg, 0.0235 mmol) and effervescence was observed. The solution was stirred for 15 minutes to form a yellow solution. The solution was layered with pentane and stored at -18 °C. After 72 h the mother liquor was removed from the solid and the yellow crystals were washed with pentane and dried *in vacuo*. Isolation in the glove box yielded 24.7 mg of [Cp\*Rh(PPh<sub>2</sub>·BH<sub>3</sub>)(PMe<sub>3</sub>)] [BAr<sup>F</sup><sub>4</sub>] (76%).

**<sup>1</sup>H NMR (500 MHz, CD<sub>2</sub>Cl<sub>2</sub>):** δ 7.73 (s, 8 H, BAr<sup>F</sup><sub>4</sub>), 7.69 (m, 2 H, Ar-H), 7.57 (s, 4 H, BAr<sup>F</sup><sub>4</sub>), 7.55 (m, 4 H, Ar-H), 7.45 (m, 4 H, Ar-H), 1.66 (s, 15 H, Cp\*), 1.05 (d, <sup>2</sup>J<sub>HP</sub> = 10.4 Hz, 9 H, PMe<sub>3</sub>), 0.27 (v br, 2 H, Rh-H-BH<sub>2</sub>), -10.81 (br, 1 H, Rh-H-BH<sub>2</sub>).

$^{31}\text{P}\{^1\text{H}\}$  NMR ( MHz,  $\text{CD}_2\text{Cl}_2$ ):  $\delta$  6.9 (br,  $\text{PPh}_2\text{-BH}_3$ ), -6.6 (dd,  $J_{\text{PRh}} = 139$  Hz,  $J_{\text{PP}} = 22$  Hz,  $\text{PMe}_3$ ).

$^{11}\text{B}\{^1\text{H}\}$  NMR (160 MHz,  $\text{CD}_2\text{Cl}_2$ ):  $\delta$  -6.60 (s,  $\text{BAr}^{\text{F}}_4$ ), -45.5 (br, Rh- $\text{H}_3\text{B}$ ).

ESI-MS ( $\text{CH}_2\text{Cl}_2$ , 60 °C): positive ion:  $m/z = 501.13$  (calc. 501.13,  $\text{M}^+\text{-BH}$ )

Microanalysis found: C 49.86%, H 3.50%. Calculated for  $\text{C}_{57}\text{H}_{49}\text{B}_2\text{F}_{24}\text{P}_2\text{Rh}$ : C 49.73%, H 3.59%.

See figure S11 for NMR spectroscopy experiment to show degenerate exchange of  $\text{BH}_3$  protons in **6**. Selected spectra showing  $6^{\text{D}}$  formation are shown in figures S14 and S15.

### [RhCp\*(PCy<sub>2</sub>-BH<sub>3</sub>)(PMe<sub>3</sub>)] [BAr<sup>F</sup><sub>4</sub>] (7)

A solution of  $\text{H}_3\text{B}\cdot\text{PPh}_2\text{H}$  (2.5 mg, 0.0117 mmol) in  $\text{CH}_2\text{Cl}_2$  (1 cm<sup>3</sup>) was added to [RhCp\*Me(PMe<sub>3</sub>)(CH<sub>2</sub>Cl<sub>2</sub>)] [BAr<sup>F</sup><sub>4</sub>] (15.0 mg, 0.0117 mmol) and effervescence was observed. The solution was stirred for 5 minutes to form a bright yellow solution which was then cooled to -20 °C to prevent decomposition. The solution was layered with cold pentane and stored at -18 °C. After 72 h the mother liquor was removed from the solid and the yellow crystals were washed with pentane and dried *in vacuo*. Isolation in the glove box yielded 9.4 mg of [RhCp\*(PCy<sub>2</sub>-BH<sub>3</sub>)(PMe<sub>3</sub>)] [BAr<sup>F</sup><sub>4</sub>] (58%).

$^1\text{H}$  NMR (500 MHz,  $\text{CD}_2\text{Cl}_2$ ):  $\delta$  7.72 (s, 8 H, BAr<sup>F</sup><sub>4</sub>), 7.56 (s, 4 H, BAr<sup>F</sup><sub>4</sub>), 2.27 to 1.01 (m, 22 H, Cy-H), 1.91 (s, 15 H, Cp\*), 1.41 (d,  $^2J_{\text{HP}} = 10.1$  Hz, 9 H, PMe<sub>3</sub>), -0.41 (br, 2 H, Rh-H-BH<sub>2</sub>), -11.42 (br, 1 H, Rh-H-BH<sub>2</sub>).

$^{31}\text{P}\{^1\text{H}\}$  NMR (202 MHz,  $\text{CD}_2\text{Cl}_2$ ):  $\delta$  19.5 (br, PCy<sub>2</sub>-BH<sub>3</sub>), -8.8 (dd,  $J_{\text{PRh}} = 142$  Hz,  $J_{\text{PP}} = 21$  Hz, PMe<sub>3</sub>).

$^{11}\text{B}\{^1\text{H}\}$  NMR (160 MHz,  $\text{CD}_2\text{Cl}_2$ ):  $\delta$  -6.61 (s, BAr<sup>F</sup><sub>4</sub>), -42.8 (br, Rh- $\text{H}_3\text{B}$ ).

ESI-MS ( $\text{CH}_2\text{Cl}_2$ , 60 °C): positive ion:  $m/z = 525.25$  (calc. 525.25,  $\text{M}^+$ ).

Microanalysis found: C 49.36%, H 4.39%. Calculated for  $\text{C}_{57}\text{H}_{61}\text{B}_2\text{F}_{24}\text{P}_2\text{Rh}$ : C 49.29%, H 4.43%.

### [RhCp\*H(PHPh<sub>2</sub>)(PMe<sub>3</sub>)] [BAr<sup>F</sup><sub>4</sub>] (5)

[RhCp\*(PPh<sub>2</sub>-BH<sub>3</sub>)(PMe<sub>3</sub>)] [BAr<sup>F</sup><sub>4</sub>] (15.0 mg, 0.0109 mmol) was dissolved in 1,2-C<sub>6</sub>H<sub>4</sub>F<sub>2</sub> (0.4 cm<sup>3</sup>) in a high-pressure NMR tube. The tube was degassed using the freeze/pump/thaw method (x 3) and placed under an atmosphere of H<sub>2</sub> (approximately 4 atm). The tube was mixed by inversion for 16 h and degassed again. The solvent was removed *in vacuo* and CD<sub>2</sub>Cl<sub>2</sub> was added. A yellow solid (6.4 mg, 43%) was isolated by layering the dichloromethane solution with pentane and storage at -18 °C for 24 h.

$^1\text{H}$  NMR (500 MHz,  $\text{CD}_2\text{Cl}_2$ ):  $\delta$  7.73 (s, 8 H, BAr<sup>F</sup><sub>4</sub>), 7.57 (s, 4 H, BAr<sup>F</sup><sub>4</sub>), 7.59 to 7.46 (m, 6 H, Ar-H), 7.29 (m, 2 H, Ar-H) 7.18 (m, 1 H, Ar-H) 7.12 (m, 1 H, Ar-H), 6.64 (d,  $^1J_{\text{HP}} = 377.8$  Hz,

1 H, PPh<sub>2</sub>), 1.74 (s, 15 H, Cp\*), 1.34 (d, <sup>2</sup>J<sub>HP</sub> = 10.4 Hz, 9 H, PMe<sub>3</sub>), -12.24 (v dt, J<sub>HRh</sub> = 22.6 Hz, J<sub>HP</sub> = 35.1 Hz, 1 H, Rh-H).

<sup>31</sup>P{<sup>1</sup>H} NMR (202 MHz, CD<sub>2</sub>Cl<sub>2</sub>): δ 20.2 (dd, J<sub>PRh</sub> = 140 Hz, J<sub>PP</sub> = 37 Hz, PPh<sub>2</sub>), -1.0 (dd, J<sub>PRh</sub> = 133 Hz, J<sub>PP</sub> = 37 Hz, PMe<sub>3</sub>).

ESI-MS (CH<sub>2</sub>Cl<sub>2</sub>, 60 °C): positive ion: m/z = 501.13 (calc. 501.13, M<sup>+</sup>).

Microanalysis found: C 50.25%, H 3.42%. Calculated for C<sub>57</sub>H<sub>48</sub>BF<sub>24</sub>P<sub>2</sub>Rh: C 50.16%, H 3.54%.

### [RhCp\*H(PHCy<sub>2</sub>)(PMe<sub>3</sub>)] [BAR<sup>F</sup><sub>4</sub>] (8)

[RhCp\*(PCy<sub>2</sub>·BH<sub>3</sub>)(PMe<sub>3</sub>)] [BAR<sup>F</sup><sub>4</sub>] (12.0 mg, 0.0087 mmol) was dissolved in CD<sub>2</sub>Cl<sub>2</sub> (0.4 cm<sup>3</sup>) in a high-pressure NMR tube and allowed to stand at room temperature for 48 h.

5 is formed as the major component of a mixture of compounds. We were unable to identify the other products but the NMR signals for 5 are reported below.

<sup>1</sup>H NMR (500 MHz, CD<sub>2</sub>Cl<sub>2</sub>): δ 7.72 (s, 8 H, BAR<sup>F</sup><sub>4</sub>), 7.56 (s, 4 H, BAR<sup>F</sup><sub>4</sub>), 3.88 (dm, <sup>1</sup>J<sub>HP</sub> = 336.3 Hz, 1 H, PHCy<sub>2</sub>), 2.25 to 1.16 (m, 22 H, Cy-H), 1.88 (s, 15 H, Cp\*), 1.46 (d, <sup>2</sup>J<sub>HP</sub> = 9.8 Hz, 9 H, PMe<sub>3</sub>), -12.95 (ddd, J<sub>HRh</sub> = 21.3 Hz, J<sub>HP</sub> = 30.5 Hz, J<sub>HP</sub> = 38.8 Hz, 1 H, Rh-H).

<sup>31</sup>P{<sup>1</sup>H} NMR (202 MHz, CD<sub>2</sub>Cl<sub>2</sub>): δ 42.7 (br d, J<sub>PRh</sub> ≈ 140 Hz, PHCy<sub>2</sub>), -0.4 (br dd, J<sub>PRh</sub> ≈ 130 Hz, J<sub>PP</sub> ≈ 25 Hz, PMe<sub>3</sub>).

ESI-MS (CH<sub>2</sub>Cl<sub>2</sub>, 60 °C): positive ion: m/z = 513.23 (calc. 513.23, M<sup>+</sup>).

### [RhCp\*H(P<sup>t</sup>Bu<sub>2</sub>BH<sub>2</sub>·PMe<sub>3</sub>)] [BAR<sup>F</sup><sub>4</sub>] (9)

A solution of H<sub>3</sub>B·P<sup>t</sup>Bu<sub>2</sub>H (3.8 mg, 0.0235 mmol) in CH<sub>2</sub>Cl<sub>2</sub> (2 cm<sup>3</sup>) was added to [RhCp\*Me(PMe<sub>3</sub>)(CH<sub>2</sub>Cl<sub>2</sub>)] [BAR<sup>F</sup><sub>4</sub>] (30.0 mg, 0.0235 mmol). The solution was stirred for 4 hours changing from a deep red to form a bright yellow solution. The solution was layered with pentane and stored at -18 °C. After 72 h the mother liquor was removed from the solid and the yellow crystals were washed with pentane and dried *in vacuo*. Isolation in the glove box yielded 17.4 mg of [RhCp\*(PPh<sub>2</sub>·BH<sub>3</sub>)(PMe<sub>3</sub>)] [BAR<sup>F</sup><sub>4</sub>] (55%).

<sup>1</sup>H NMR (500 MHz, CD<sub>2</sub>Cl<sub>2</sub>): δ 7.73 (s, 8 H, BAR<sup>F</sup><sub>4</sub>), 7.57 (s, 4 H, BAR<sup>F</sup><sub>4</sub>), 2.01 (s, 15 H, Cp\*), 1.45 (d, <sup>2</sup>J<sub>HP</sub> = 11.3 Hz, 9 H, PMe<sub>3</sub>), 1.31 (br m, 18 H, <sup>t</sup>Bu-H), 0.50 (br, 1 H, Rh-H-BH), -10.79 (br, 1 H, Rh-H-BH), -13.76 (br, 1 H, Rh-H).

<sup>31</sup>P{<sup>1</sup>H} NMR (202 MHz, CD<sub>2</sub>Cl<sub>2</sub>): δ 54.8 (br, P<sup>t</sup>Bu<sub>2</sub>BH<sub>2</sub>·PMe<sub>3</sub>), -7.8 (br, P<sup>t</sup>Bu<sub>2</sub>BH<sub>2</sub>·PMe<sub>3</sub>).

<sup>11</sup>B{<sup>1</sup>H} NMR (160 MHz, CD<sub>2</sub>Cl<sub>2</sub>): δ -6.61 (s, BAR<sup>F</sup><sub>4</sub>), -45.4 (br vt, <sup>1</sup>J<sub>BP</sub> ≈ 95 Hz, P<sup>t</sup>Bu<sub>2</sub>BH<sub>2</sub>·PMe<sub>3</sub>).

ESI-MS (CH<sub>2</sub>Cl<sub>2</sub>, 60 °C): positive ion: m/z = 473.21 (calc. 473.21, M<sup>+</sup>).

**Microanalysis found:** C 47.68%, H 4.33%. **Calculated for C<sub>53</sub>H<sub>57</sub>B<sub>2</sub>F<sub>24</sub>P<sub>2</sub>Rh:** C 47.62%, H 4.30%.

### [RhCp\*Me(PMe<sub>3</sub>)(H<sub>3</sub>B·P<sup>t</sup>Bu<sub>2</sub>H)][BAR<sup>F</sup><sub>4</sub>] (10)

H<sub>3</sub>B·P<sup>t</sup>Bu<sub>2</sub>H (1.9 mg, 0.0117 mmol) and [RhCp\*Me(PMe<sub>3</sub>)(CH<sub>2</sub>Cl<sub>2</sub>)] [BAR<sup>F</sup><sub>4</sub>] (15.0 mg, 0.0117 mmol) were dissolved in separate high pressure NMR tubes in CD<sub>2</sub>Cl<sub>2</sub> (each in 0.2 cm<sup>3</sup>). The solutions were cooled to -78 °C and the solution of H<sub>3</sub>B·P<sup>t</sup>Bu<sub>2</sub>H transferred to the tube containing [RhCp\*Me(PMe<sub>3</sub>)(CH<sub>2</sub>Cl<sub>2</sub>)] [BAR<sup>F</sup><sub>4</sub>] by cannula. The solutions were mixed carefully to ensure they remained at -78 °C to produce a yellow solution. The cold tube was loaded into the NMR spectrometer which was precooled to -80 °C.

Due to the instability of [RhCp\*Me(PMe<sub>3</sub>)(H<sub>3</sub>B·P<sup>t</sup>Bu<sub>2</sub>H)][BAR<sup>F</sup><sub>4</sub>] at higher temperatures, we did not attempt isolation of this product. The NMR data is reported on the freshly prepared sample which was kept cold.

**<sup>1</sup>H NMR (500 MHz, CD<sub>2</sub>Cl<sub>2</sub>, -80 °C):** δ 7.71 (s, 8 H, BAR<sup>F</sup><sub>4</sub>), 7.52 (s, 4 H, BAR<sup>F</sup><sub>4</sub>), 4.08 (d, <sup>1</sup>J<sub>HP</sub> = 362.9 Hz, 1 H, PH<sup>t</sup>Bu<sub>2</sub>), 1.50 (s, 15 H, Cp\*), 1.25 (d, <sup>2</sup>J<sub>HP</sub> = 10.1 Hz, 9 H, PMe<sub>3</sub>), 1.16 (m, 18 H, C-CH<sub>3</sub>), 0.79 (m, 3 H, Rh-CH<sub>3</sub>) -4.01 (br, 3 H, Rh-H<sub>3</sub>B).

**<sup>31</sup>P{<sup>1</sup>H} NMR (202 MHz, CD<sub>2</sub>Cl<sub>2</sub>, -80 °C):** δ 35.4 (br s, PH<sup>t</sup>Bu<sub>2</sub>·BH<sub>3</sub>), 8.3 (d, J<sub>PRh</sub> = 149 Hz, PMe<sub>3</sub>).

**<sup>11</sup>B{<sup>1</sup>H} NMR (160 MHz, CD<sub>2</sub>Cl<sub>2</sub>, -80 °C):** δ -6.8 (s, BAR<sup>F</sup><sub>4</sub>), -44.8 (br, Rh-H<sub>3</sub>B).

### [RhCp\*(H<sub>2</sub>B·PH<sup>t</sup>Bu<sub>2</sub>)(PMe<sub>3</sub>)] [BAR<sup>F</sup><sub>4</sub>] (11)

H<sub>3</sub>B·P<sup>t</sup>Bu<sub>2</sub>H (1.9 mg, 0.0117 mmol) and [RhCp\*Me(PMe<sub>3</sub>)(CH<sub>2</sub>Cl<sub>2</sub>)] [BAR<sup>F</sup><sub>4</sub>] (15.0 mg, 0.0117 mmol) were dissolved in separate high pressure NMR tubes in CD<sub>2</sub>Cl<sub>2</sub> (each in 0.2 cm<sup>3</sup>). The solutions were cooled to -78 °C and the solution of H<sub>3</sub>B·P<sup>t</sup>Bu<sub>2</sub>H transferred to the tube containing [RhCp\*Me(PMe<sub>3</sub>)(CH<sub>2</sub>Cl<sub>2</sub>)] [BAR<sup>F</sup><sub>4</sub>] by cannula. The solutions were mixed carefully to ensure they remained at -78 °C to produce a yellow solution. The solution was warmed to -40 °C to produce a very deep red solution. The cold tube was loaded into the NMR spectrometer which was precooled to -40 °C.

[RhCp\*Me(PMe<sub>3</sub>)(H<sub>3</sub>B·P<sup>t</sup>Bu<sub>2</sub>H)][BAR<sup>F</sup><sub>4</sub>] could be crystallised by layering the cold solution (-40 °C) with pentane and storing at -18 °C for 48 h. However, attempts to isolate these crystals resulted in discolouration of the dark red crystals and decomposition. The NMR data is reported on the freshly prepared sample which was kept cold. The molecular ion of **11** has an identical mass to that of **9**, since **11** converts to **9** in solution ESI-MS analysis could not definitively confirm the presence of **11** rather than its isomer **9**.

**<sup>1</sup>H NMR (500 MHz, CD<sub>2</sub>Cl<sub>2</sub>, -40 °C):** δ 7.72 (s, 8 H, BAR<sup>F</sup><sub>4</sub>), 7.54 (s, 4 H, BAR<sup>F</sup><sub>4</sub>), 7.11 (br s, 1 H, Rh-H-BH), 4.68 (dm, <sup>1</sup>J<sub>HP</sub> = 379.9 Hz, 1 H, PH<sup>t</sup>Bu<sub>2</sub>), 1.74 (s, 15 H, Cp\*), 1.42 (d, <sup>2</sup>J<sub>HP</sub> = 9.5 Hz, 9 H, PMe<sub>3</sub>), 1.30 (d, <sup>3</sup>J<sub>HP</sub> = 14.7 Hz, 9 H, <sup>t</sup>Bu), 1.20 (d, <sup>3</sup>J<sub>HP</sub> = 11.9 Hz, 9 H, <sup>t</sup>Bu), 0.15 (s, CH<sub>4</sub>), -12.76 (br d, <sup>1</sup>J<sub>HRh</sub> = 37.8 Hz, 1 H, Rh-H-BH).

**$^{31}\text{P}\{^1\text{H}\}$  NMR (202 MHz,  $\text{CD}_2\text{Cl}_2$ , -40 °C):**  $\delta$  25.1 (br s,  $\text{PH}^t\text{Bu}_2\cdot\text{BH}_2$ ), -1.9 (d,  $J_{\text{PRh}} = 187$  Hz,  $\text{PMe}_3$ ).

**$^{11}\text{B}\{^1\text{H}\}$  NMR (160 MHz,  $\text{CD}_2\text{Cl}_2$ , -40 °C):**  $\delta$  47.6 (br,  $\text{Rh-BH}_2$ ), -6.7 (s,  $\text{BAr}^{\text{F}_4}$ ).

See figure S16 for following of reaction and formation of compounds **9**, **10** and **11** by NMR spectroscopy.

### **$[\text{RhCp}^*(\text{H}_2\text{B}\cdot\text{PCy}_3)(\text{PMe}_3)][\text{BAr}^{\text{F}_4}]$ (**12**)**

$\text{H}_3\text{B}\cdot\text{PCy}_3$  (3.5 mg, 0.0117 mmol) and  $[\text{RhCp}^*\text{Me}(\text{PMe}_3)(\text{CH}_2\text{Cl}_2)][\text{BAr}^{\text{F}_4}]$  (15.0 mg, 0.0117 mmol) were added to a high pressure NMR tube.  $\text{CD}_2\text{Cl}_2$  (0.4  $\text{cm}^3$ ) was added and the solution mixed to form a very deep red solution.

The NMR data of  $[\text{RhCp}^*(\text{H}_2\text{B}\cdot\text{PCy}_3)(\text{PMe}_3)][\text{BAr}^{\text{F}_4}]$  is reported on the freshly prepared sample. Attempts to isolate as a solid product **12** resulted in formation of an oil which decomposed upon being placed under vacuum. The molecular ion could not be observed by ESI-MS due to decomposition.

**$^1\text{H}$  NMR (500 MHz,  $\text{CD}_2\text{Cl}_2$ ):**  $\delta$  7.73 (s, 8 H,  $\text{BAr}^{\text{F}_4}$ ), 7.57 (s, 4 H,  $\text{BAr}^{\text{F}_4}$ ), 2.32 to 1.23 (m, 34 H,  $\text{Cy-H}$  and  $\text{Rh-H-BH}$ ) 1.86 (s, 15 H,  $\text{Cp}^*$ ), 1.52 (d,  $^2J_{\text{HP}} = 9.5$  Hz, 9 H,  $\text{PMe}_3$ ), -13.57 (br, 1 H,  $\text{Rh-H-BH}$ ).

**$^{31}\text{P}\{^1\text{H}\}$  NMR (202 MHz,  $\text{CD}_2\text{Cl}_2$ ):**  $\delta$  11.3 (br s,  $\text{PCy}_3\cdot\text{BH}_2$ ), -1.3 (d,  $J_{\text{PRh}} = 189$  Hz,  $\text{PMe}_3$ ).

**$^{11}\text{B}\{^1\text{H}\}$  NMR (160 MHz,  $\text{CD}_2\text{Cl}_2$ ):**  $\delta$  53.0 (br,  $\text{Rh-BH}_2$ ), -6.6 (s,  $\text{BAr}^{\text{F}_4}$ ).

### **$[\text{RhCp}^*\text{H}(\text{H}_3\text{B}\cdot\text{PCy}_3)(\text{PMe}_3)][\text{BAr}^{\text{F}_4}]$ (**13**)**

$\text{H}_3\text{B}\cdot\text{PCy}_3$  (3.5 mg, 0.0117 mmol) and  $[\text{RhCp}^*\text{Me}(\text{PMe}_3)(\text{CH}_2\text{Cl}_2)][\text{BAr}^{\text{F}_4}]$  (15.0 mg, 0.0117 mmol) were added to a high pressure NMR tube.  $\text{CD}_2\text{Cl}_2$  (0.4  $\text{cm}^3$ ) was added and the solution mixed to form a very deep red solution. The solution was degassed using the freeze/pump/thaw method (x 3) and placed under a hydrogen atmosphere (~ 4 atm). The tube was vigorously shaken to produce an orange solution.

At room temperature an exchange process was occurring on the NMR timescale in which the terminal  $\text{Rh-H}$  is exchanging with the sigma-bound  $\text{Rh-H}_3\text{B}$  proton environments. The exchange was frozen out by cooling to -60 °C and the NMR data is reported at this temperature under an  $\text{H}_2$  atmosphere.

**$^1\text{H}$  NMR (500 MHz,  $\text{CD}_2\text{Cl}_2$ , -60 °C):**  $\delta$  7.72 (s, 8 H,  $\text{BAr}^{\text{F}_4}$ ), 7.55 (s, 4 H,  $\text{BAr}^{\text{F}_4}$ ), 4.56 (s,  $\text{H}_2$ ), 1.86 to 1.10 (m, 33 H,  $\text{Cy-H}$ ) 1.72 (s, 15 H,  $\text{Cp}^*$ ), 1.35 (d,  $^2J_{\text{HP}} = 10.7$  Hz, 9 H,  $\text{PMe}_3$ ), -4.07 (br, 3 H,  $\text{Rh-H}_3\text{B}$ ), -11.53 (dd,  $^1J_{\text{HRh}} = 20.5$  Hz,  $^2J_{\text{HP}} = 42.4$  Hz, 1 H,  $\text{Rh-H}$ ).

**$^{31}\text{P}\{^1\text{H}\}$  NMR (202 MHz,  $\text{CD}_2\text{Cl}_2$ , -60 °C):**  $\delta$  18.7 (br s,  $\text{PCy}_3\cdot\text{BH}_3$ ), 8.7 (d,  $J_{\text{PRh}} = 137$  Hz,  $\text{PMe}_3$ ).

**$^{11}\text{B}\{^1\text{H}\}$  NMR (160 MHz,  $\text{CD}_2\text{Cl}_2$ , -60 °C):**  $\delta$  -6.8 (s,  $\text{BAr}^{\text{F}_4}$ ), -45.3 (br,  $\text{Rh-H}_3\text{B}$ ).



See figure S17 NMR spectroscopy data.

### **[RhCp\*(H<sub>2</sub>B·PCy<sub>3</sub>)(PMe<sub>3</sub>)(PPh<sub>3</sub>)] [BAr<sup>F</sup><sub>4</sub>] (14)**

**12** was prepared as above and transferred via cannula to a NMR tube containing PPh<sub>3</sub> (3.1 mg, 0.0117 mmol) and the tube shaken to produce a yellow/orange solution. The NMR data is reported of the material generated in situ and attempts at isolation resulted in the formation of an oil.

**<sup>1</sup>H NMR (500 MHz, CD<sub>2</sub>Cl<sub>2</sub>):** δ 7.74 (s, 8 H, BAr<sup>F</sup><sub>4</sub>), 7.61 (m, 5 H, Ar-H), 7.57 (s, 4 H, BAr<sup>F</sup><sub>4</sub>), 7.48 (m, 3 H, Ar-H), 7.41 (m, 5 H, Ar-H), 7.32 (m, 2 H, Ar-H), 2.42 (br m, 1 H, B-H), 2.08 to 1.24 (m, 33 H, Cy-H), 2.12 (s, 3 H, Cp\*-CH<sub>3</sub>), 1.79 (s, 3 H, Cp\*-CH<sub>3</sub>), 1.78 (s, 3 H, Cp\*-CH<sub>3</sub>), 1.66 (s, 3 H, Cp\*-CH<sub>3</sub>), 0.88 (d, <sup>2</sup>J<sub>HP</sub> = 8.5 Hz, 6 H, P-CH<sub>3</sub>), 0.72 (s, 3 H, Cp\*-CH<sub>3</sub>), 0.58 (d, <sup>2</sup>J<sub>HP</sub> = 4.3 Hz, 3 H, P-CH<sub>3</sub>), 0.23 (br m, 1 H, B-H).

**<sup>31</sup>P{<sup>1</sup>H} NMR (202 MHz, CD<sub>2</sub>Cl<sub>2</sub>):** δ 37.6 (dd, J<sub>PRh</sub> = 196 Hz, J<sub>PP</sub> = 40 Hz, PPh<sub>3</sub>), 21.2 (br s, PCy<sub>3</sub>-BH<sub>2</sub>), -19.1 (dd, J<sub>PRh</sub> = 182 Hz, J<sub>PP</sub> = 40 Hz, PMe<sub>3</sub>).

**<sup>11</sup>B{<sup>1</sup>H} NMR (160 MHz, CD<sub>2</sub>Cl<sub>2</sub>):** δ -6.6 (s, BAr<sup>F</sup><sub>4</sub>), -39.5 (br, Rh-BH<sub>2</sub>).

See figure S18 NMR spectroscopy data.

## **Crystallography**

X-ray crystallography data for all compounds was collected on an Enraf Nonius Kappa CCD diffractometer using graphite monochromated Mo K $\alpha$  radiation ( $\lambda = 0.71073 \text{ \AA}$ ) and a low-temperature device [150(2) K];<sup>4</sup> data were collected using COLLECT, reduction and cell refinement was performed using DENZO/SCALEPACK.<sup>5</sup> The structures were solved by direct methods (SHELXS-97) and refined by full matrix least squares using SHELXL-14.<sup>6</sup> Crystallographic data have been deposited with the Cambridge Crystallographic Data Centre under **CCDC** 1423368-70. These data can be obtained free of charge from the Cambridge Crystallographic Data Centre via [www.ccdc.cam.ac.uk/data\\_request/cif](http://www.ccdc.cam.ac.uk/data_request/cif).

**Table S2:** Crystallographic data

| Compound                                                    | <b>6</b>                                                                         | <b>7</b>                                                                         | <b>9</b>                                                                         |
|-------------------------------------------------------------|----------------------------------------------------------------------------------|----------------------------------------------------------------------------------|----------------------------------------------------------------------------------|
| CCDC No.                                                    | 1423368                                                                          | 1423369                                                                          | 1423370                                                                          |
| Formula                                                     | C <sub>57</sub> H <sub>49</sub> B <sub>2</sub> F <sub>24</sub> P <sub>2</sub> Rh | C <sub>57</sub> H <sub>61</sub> B <sub>2</sub> F <sub>24</sub> P <sub>2</sub> Rh | C <sub>53</sub> H <sub>57</sub> B <sub>2</sub> F <sub>24</sub> P <sub>2</sub> Rh |
| <i>M</i>                                                    | 1376.43                                                                          | 1388.52                                                                          | 1336.45                                                                          |
| Crystal System                                              | Monoclinic                                                                       | Monoclinic                                                                       | Triclinic                                                                        |
| Space group                                                 | <i>P</i> 21/ <i>c</i>                                                            | <i>P</i> 21/ <i>c</i>                                                            | <i>P</i> -1                                                                      |
| <i>T</i> [K]                                                | 150(2)                                                                           | 150(2)                                                                           | 150(2)                                                                           |
| <i>a</i> [Å]                                                | 12.721(3)                                                                        | 13.155(3)                                                                        | 12.494(3)                                                                        |
| <i>b</i> [Å]                                                | 26.545(5)                                                                        | 13.139(3)                                                                        | 13.356(3)                                                                        |
| <i>c</i> [Å]                                                | 18.270(4)                                                                        | 35.677(7)                                                                        | 18.152(4)                                                                        |
| $\alpha$ [°]                                                | 90                                                                               | 90                                                                               | 102.66(3)                                                                        |
| $\beta$ [°]                                                 | 107.20(3)                                                                        | 95.41(3)                                                                         | 92.36(3)                                                                         |
| $\gamma$ [°]                                                | 90                                                                               | 90                                                                               | 90.85(3)                                                                         |
| <i>V</i> [Å <sup>3</sup> ]                                  | 5894(2)                                                                          | 6139(2)                                                                          | 2952.0(11)                                                                       |
| <i>Z</i>                                                    | 4                                                                                | 4                                                                                | 2                                                                                |
| Density [g cm <sup>-3</sup> ]                               | 1.551                                                                            | 1.502                                                                            | 1.504                                                                            |
| $\mu$ (mm <sup>-1</sup> )                                   | 0.458                                                                            | 0.440                                                                            | 0.454                                                                            |
| $\theta$ range [deg]                                        | 5.091 ≤ $\theta$ ≤ 27.459                                                        | 5.128 ≤ $\theta$ ≤ 27.491                                                        | 5.109 ≤ $\theta$ ≤ 27.497                                                        |
| Reflns collected                                            | 25072                                                                            | 26843                                                                            | 23746                                                                            |
| <i>R</i> <sub>int</sub>                                     | 0.0666                                                                           | 0.1310                                                                           | 0.0365                                                                           |
| Completeness                                                | 99.1%                                                                            | 99.0 %                                                                           | 99.1 %                                                                           |
| No. of data/restr/param                                     | 13368/543/907                                                                    | 13953/346/851                                                                    | 13438/977/1019                                                                   |
| <i>R</i> <sub>1</sub> [ <i>I</i> > 2 $\sigma$ ( <i>I</i> )] | 0.0499                                                                           | 0.0625                                                                           | 0.0571                                                                           |
| <i>wR</i> <sub>2</sub> [all data]                           | 0.1224                                                                           | 0.1869                                                                           | 0.1738                                                                           |
| <i>GoF</i>                                                  | 0.989                                                                            | 0.853                                                                            | 0.867                                                                            |
| Largest diff. pk and hole [eÅ <sup>-3</sup> ]               | 0.80, -0.61                                                                      | 1.58, -0.52                                                                      | 1.09, -0.80                                                                      |

### Structure of Boryl Complex [RhCp\*(H<sub>2</sub>B·PH<sup>t</sup>Bu<sub>2</sub>)(PMe<sub>3</sub>)] [BAR<sup>F</sup><sub>4</sub>] (**11**)

Red block crystals were grown from a solution of **11** which was kept at -20 °C and layered with pentane and stored at -18 °C for 48 hours. Crystals were kept cold, isolated and quickly transferred to the cryostream of the diffractometer. The crystals diffracted strongly at low angle but very weakly at high angle. Analysis of the complete data set did not suggest signs of twinning or other problems so the poor quality data appears to be due to poor crystal quality. The data presented below is presented for connectivity purposes and bond length and angle data is not presented.

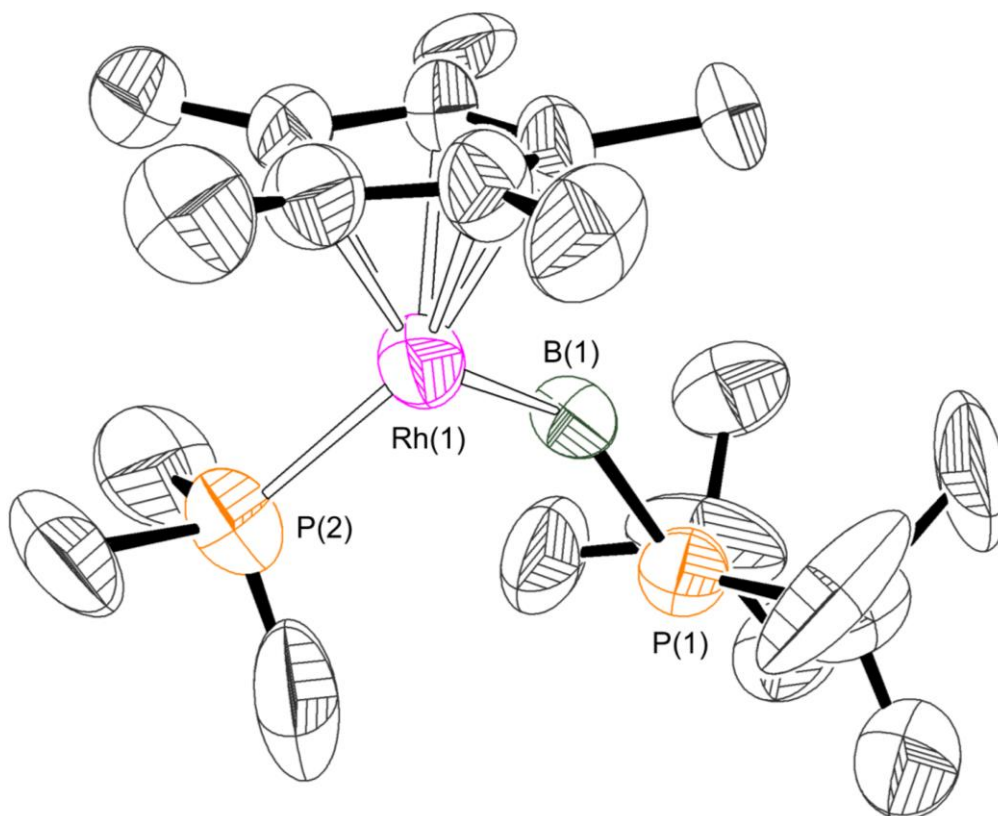

**Figure S1:** X-ray molecular structure of  $[\text{RhCp}^*(\text{H}_2\text{B}\cdot\text{P}^t\text{Bu}_2\text{H})(\text{PMe}_3)][\text{BARF}_4]$  (**11**).  $[\text{BARF}_4]^-$  anion and hydrogen atoms omitted.

Single crystal X-ray diffraction data for **7**:  $\text{C}_{53}\text{H}_{57}\text{B}_2\text{F}_{24}\text{P}_2\text{Rh}$ ,  $M = 1336.45$ , monoclinic,  $a = 12.669(3)$ ,  $b = 25.975(5)$ ,  $c = 19.200(4)$  Å,  $\beta = 105.48(3)^\circ$ ,  $V = 6089(2)$  Å<sup>3</sup>,  $T = 150(2)$  K, space group  $P2_1/c$  (no. 14),  $Z = 4$ , reflections measured 27088, 13896 unique ( $R_{\text{int}} = 0.0649$ ) which were used in all calculations. The final  $R1$  was 0.1997 [for 7154 reflections with  $I > 2\sigma(I)$ ] and the final  $wR(F_2)$  was 0.5225 (all data).

## Selected Spectra

Polymer  $[H_2BPPhH]_n$

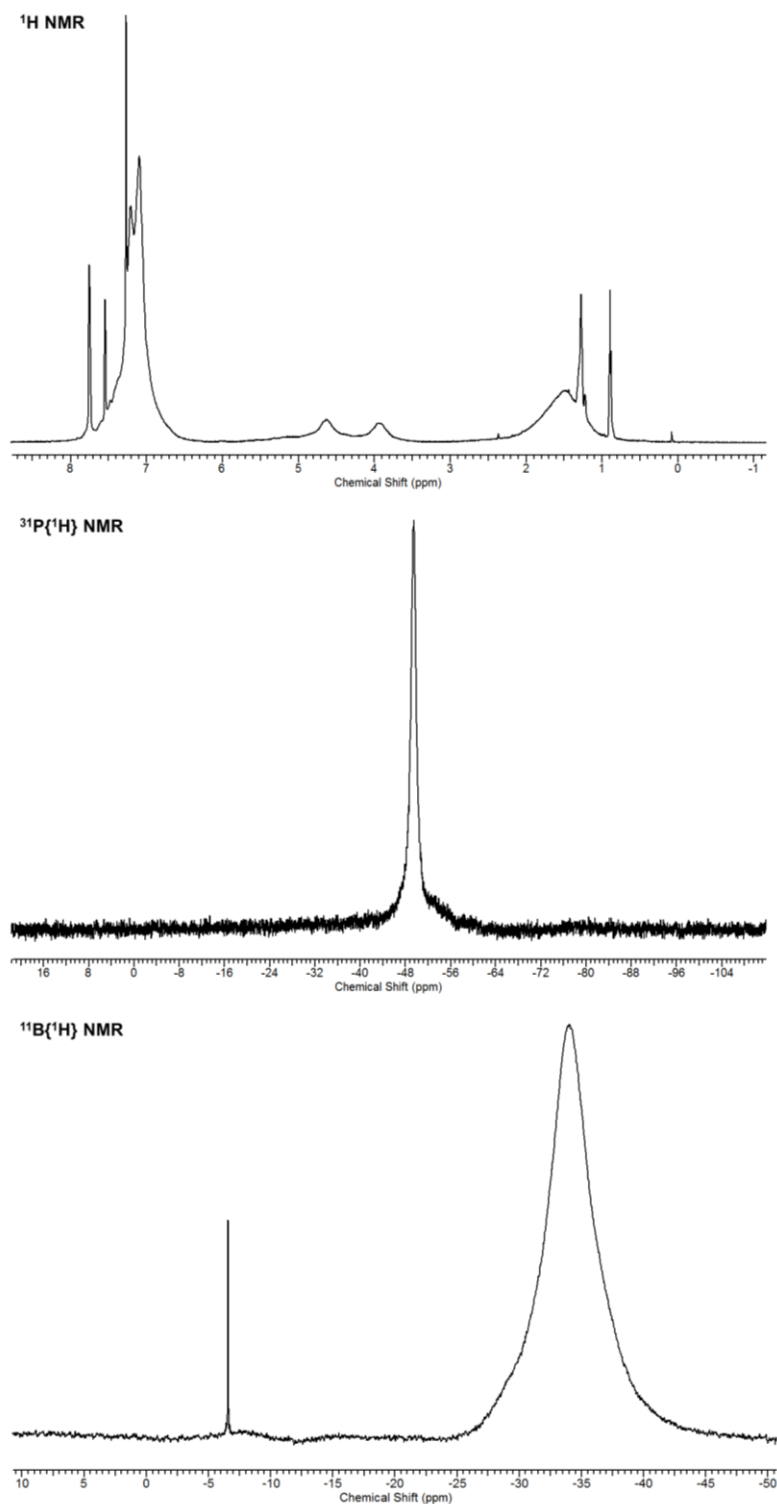

**Figure S2:** NMR spectra of isolated  $[H_2BPPhH]_n$ . Top,  $^1H$  NMR spectrum in  $CDCl_3$ ; middle,  $^{31}P\{^1H\}$  NMR spectrum in  $CDCl_3$ ; bottom,  $^{11}B\{^1H\}$  NMR spectrum in  $CDCl_3$ .

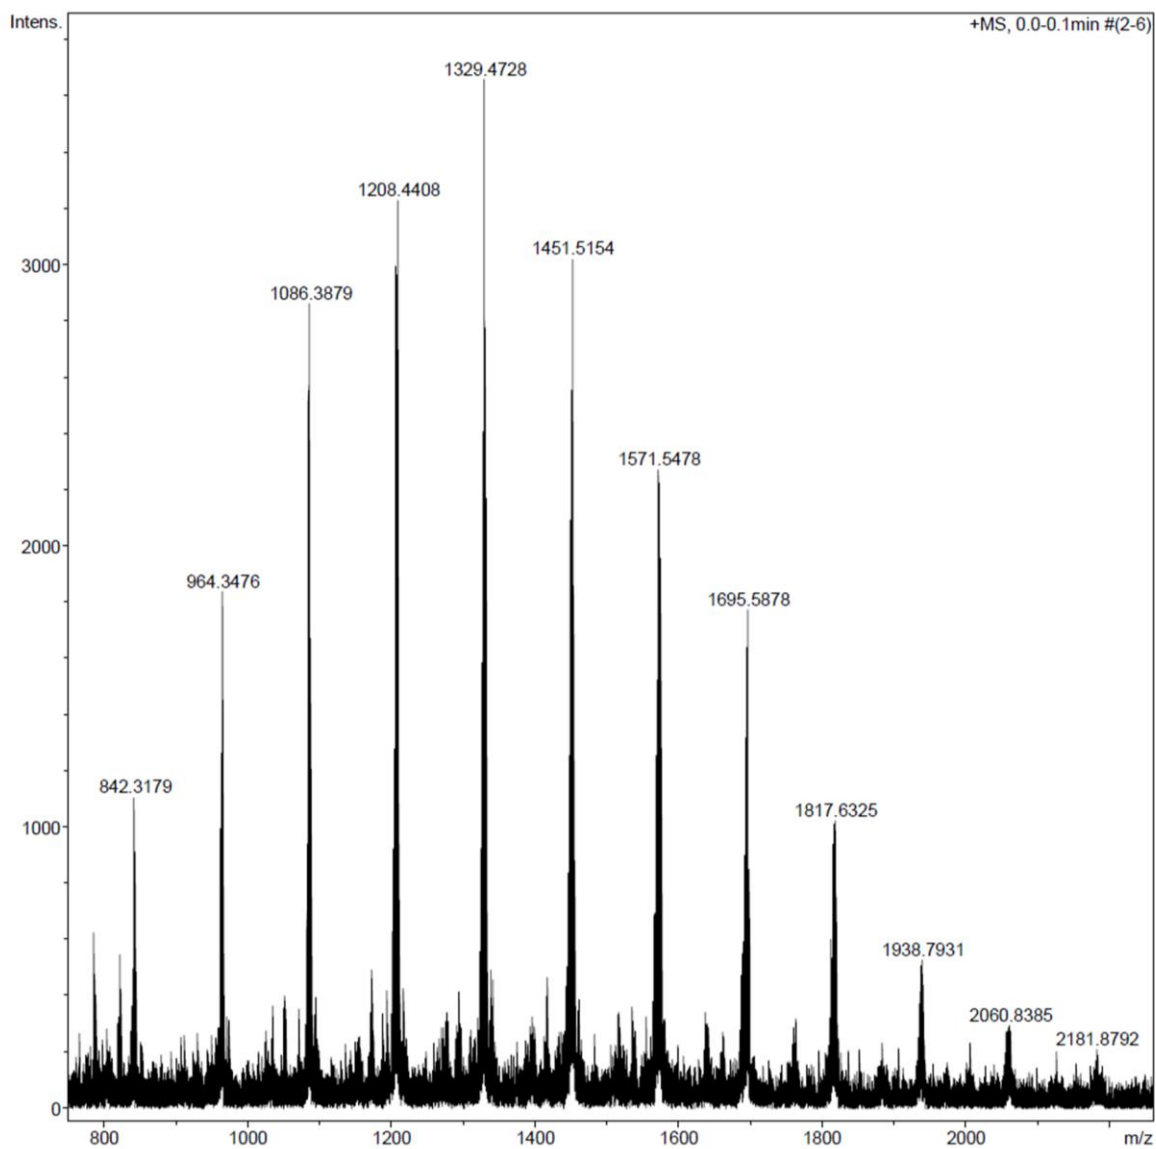

**Figure S3:** ESI-MS spectrum for  $[H(PPhHBH_2)_n PPhH_2]^+$  ( $n = 6-17$ ) sample in toluene. Sample prepared with 1 mol% **1** (72 h, 100 °C). Polymer repeat units of  $m/z$  122.1 can be observed.

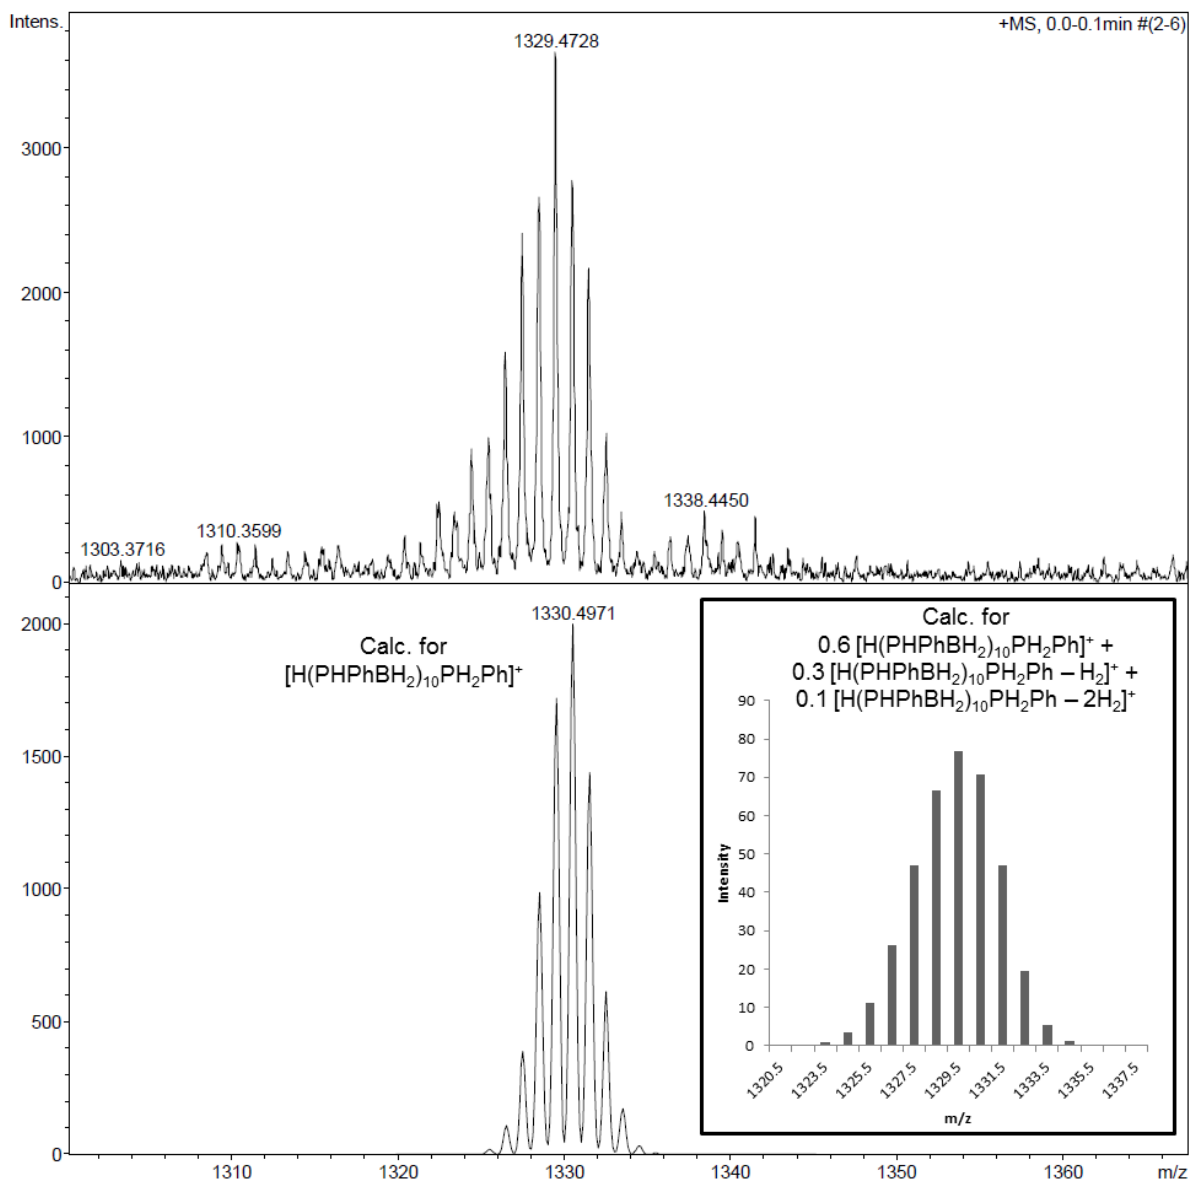

**Figure S4:** Magnification of ESI-MS spectrum for  $[H(PPhHBH_2)_{10}PPhH_2]^+$  sample in toluene (top) and calculated isotopic pattern (bottom). The calculated isotopic pattern does not match exactly and the inset shows a calculated pattern with overlapping contributions from  $[H(PPhHBH_2)_{10}PPhH_2]^+$ ,  $[H(PPhHBH_2)_{10}PPhH_2 - H_2]^+$  and  $[H(PPhHBH_2)_{10}PPhH_2 - 2H_2]^+$  which is a better fit for the experimental data.

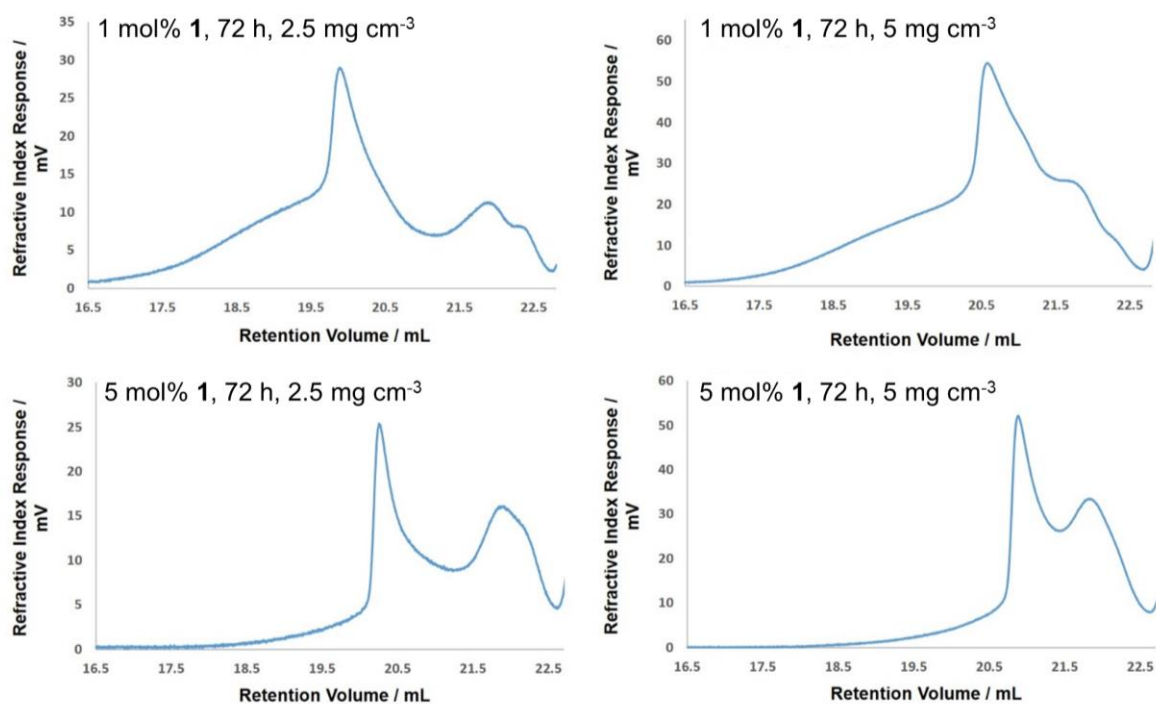

**Figure S5:** GPC traces for  $[H_2BPPhH]_n$  samples in THF. Samples prepared with 1 mol% **1** (top) and 5 mol% **1** (bottom) are shown. The samples were measured at 2 polymer concentrations,  $2.5 \text{ mg cm}^{-3}$  (left) and  $5 \text{ mg cm}^{-3}$  (right). The data quality is relatively low due to the high polydispersity of the samples.

**H<sub>3</sub>B·PPhHBH<sub>2</sub>·PPhH<sub>2</sub> (2)**

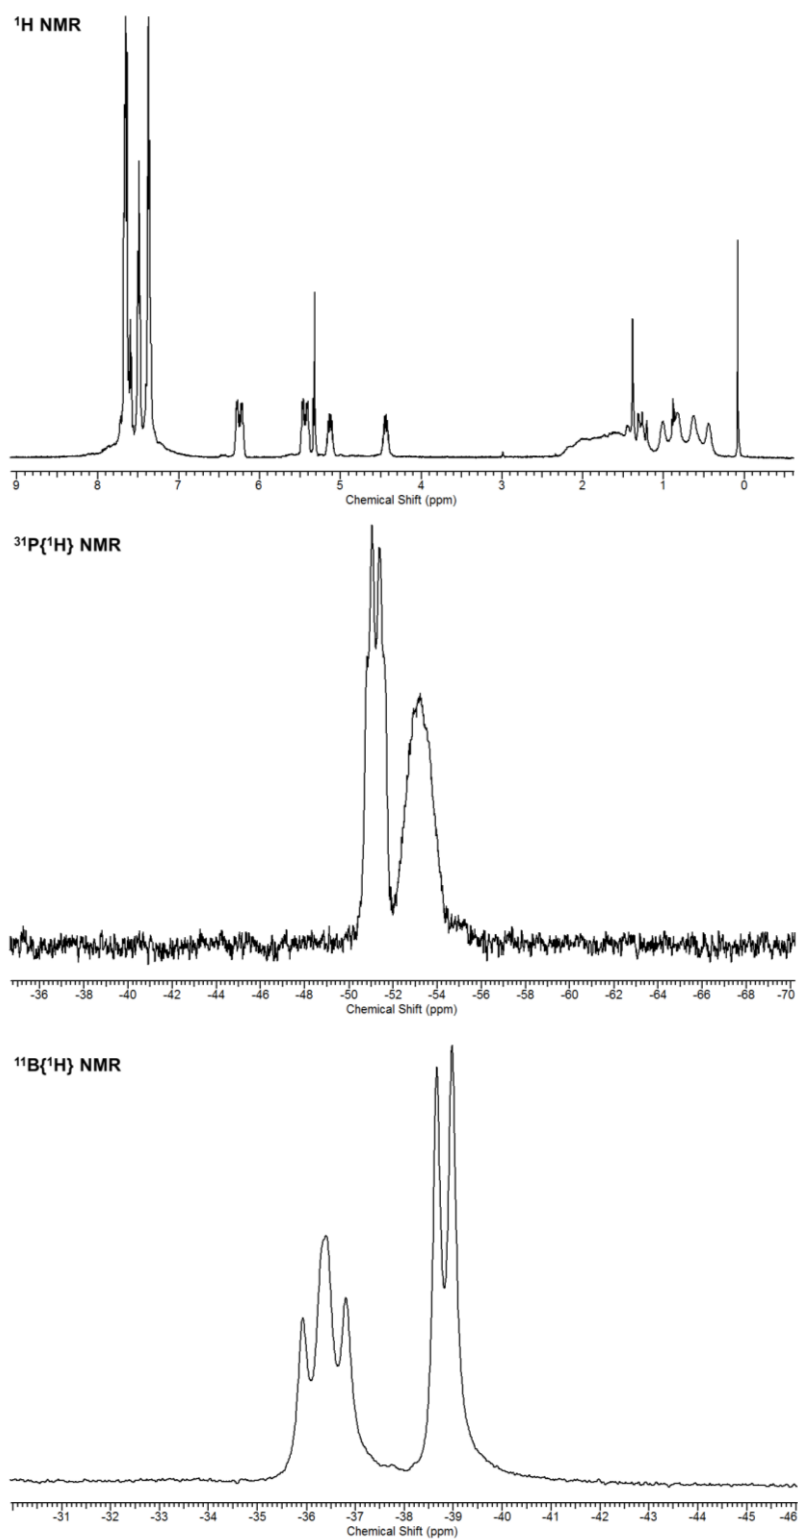

**Figure S6:** NMR spectra of isolated H<sub>3</sub>B·PPhHBH<sub>2</sub>·PPhH<sub>2</sub>. Top, <sup>1</sup>H NMR spectrum in CD<sub>2</sub>Cl<sub>2</sub>; middle, <sup>31</sup>P{<sup>1</sup>H} NMR spectrum in CD<sub>2</sub>Cl<sub>2</sub>; bottom, <sup>11</sup>B{<sup>1</sup>H} NMR spectrum in CD<sub>2</sub>Cl<sub>2</sub>.



**Detection of  $\text{H}_3\text{B}\cdot\text{PPhHBH}_2\cdot\text{PPhH}_2$  (2) – Reaction Between  $\text{H}_3\text{B}\cdot\text{PPhH}_2$  and 1 mol% 1 after 1 h**

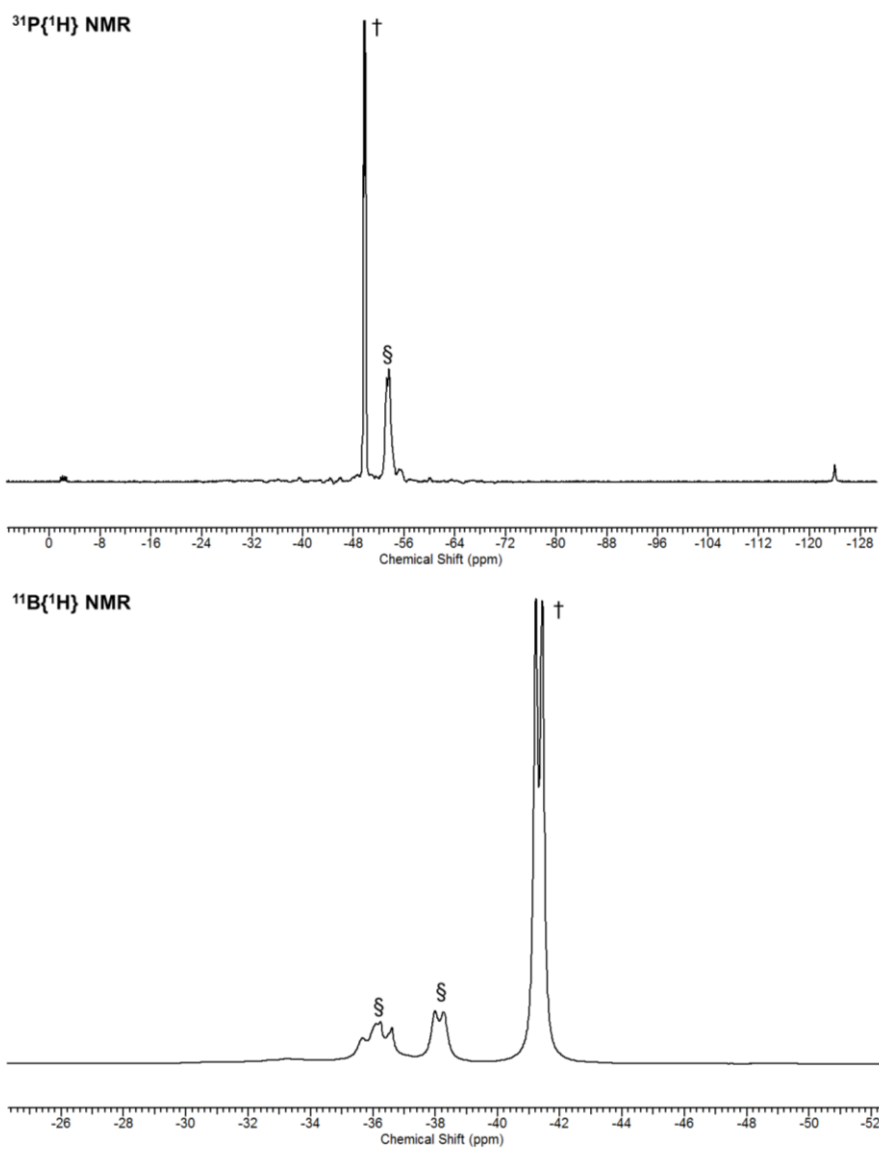

**Figure S7:** NMR spectra of reaction mixture of  $\text{H}_3\text{B}\cdot\text{PPhH}_2$  and 1 mol% 1 in toluene after heating for 1 h at 100 °C. Top,  $^{31}\text{P}\{^1\text{H}\}$  NMR spectrum; bottom,  $^{11}\text{B}\{^1\text{H}\}$  NMR spectrum. Signals for  $\text{H}_3\text{B}\cdot\text{PPhH}_2$  labelled † and signals for  $\text{H}_3\text{B}\cdot\text{PPhHBH}_2\cdot\text{PPhH}_2$  labelled §. Ratio of  $\text{H}_3\text{B}\cdot\text{PPhHBH}_2\cdot\text{PPhH}_2$  to  $\text{H}_3\text{B}\cdot\text{PPhH}_2$  approximately 1:6 from  $^{11}\text{B}\{^1\text{H}\}$  NMR integration.

## Reaction of $[\text{H}_2\text{BPPPhH}]_n$ with Precatalyst 1 to show Polymer Scission

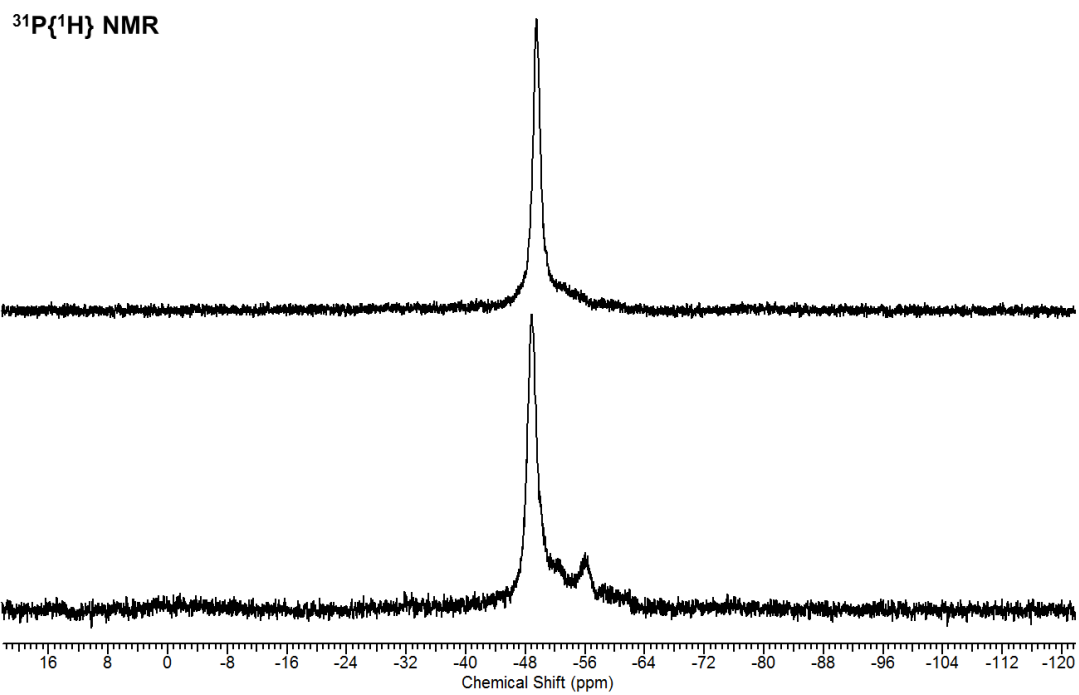

**Figure S8:** Top,  $^{31}\text{P}\{^1\text{H}\}$  NMR spectrum of isolated  $[\text{H}_2\text{BPPPhH}]_n$ . Bottom  $^{31}\text{P}\{^1\text{H}\}$  NMR spectrum of  $[\text{H}_2\text{BPPPhH}]_n$  after heating with 5 mol% **1** in toluene (100 °C, 24 h).

## Catalytic Dehydrocoupling of $\text{H}_3\text{B}\cdot\text{PPh}_2\text{H}$

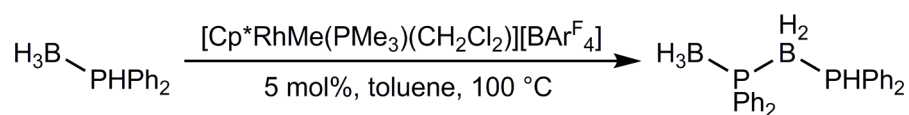

**Scheme S1:** Catalytic dehydrocoupling of  $\text{H}_3\text{B}\cdot\text{PPh}_2\text{H}$  with 5 mol% **1**.

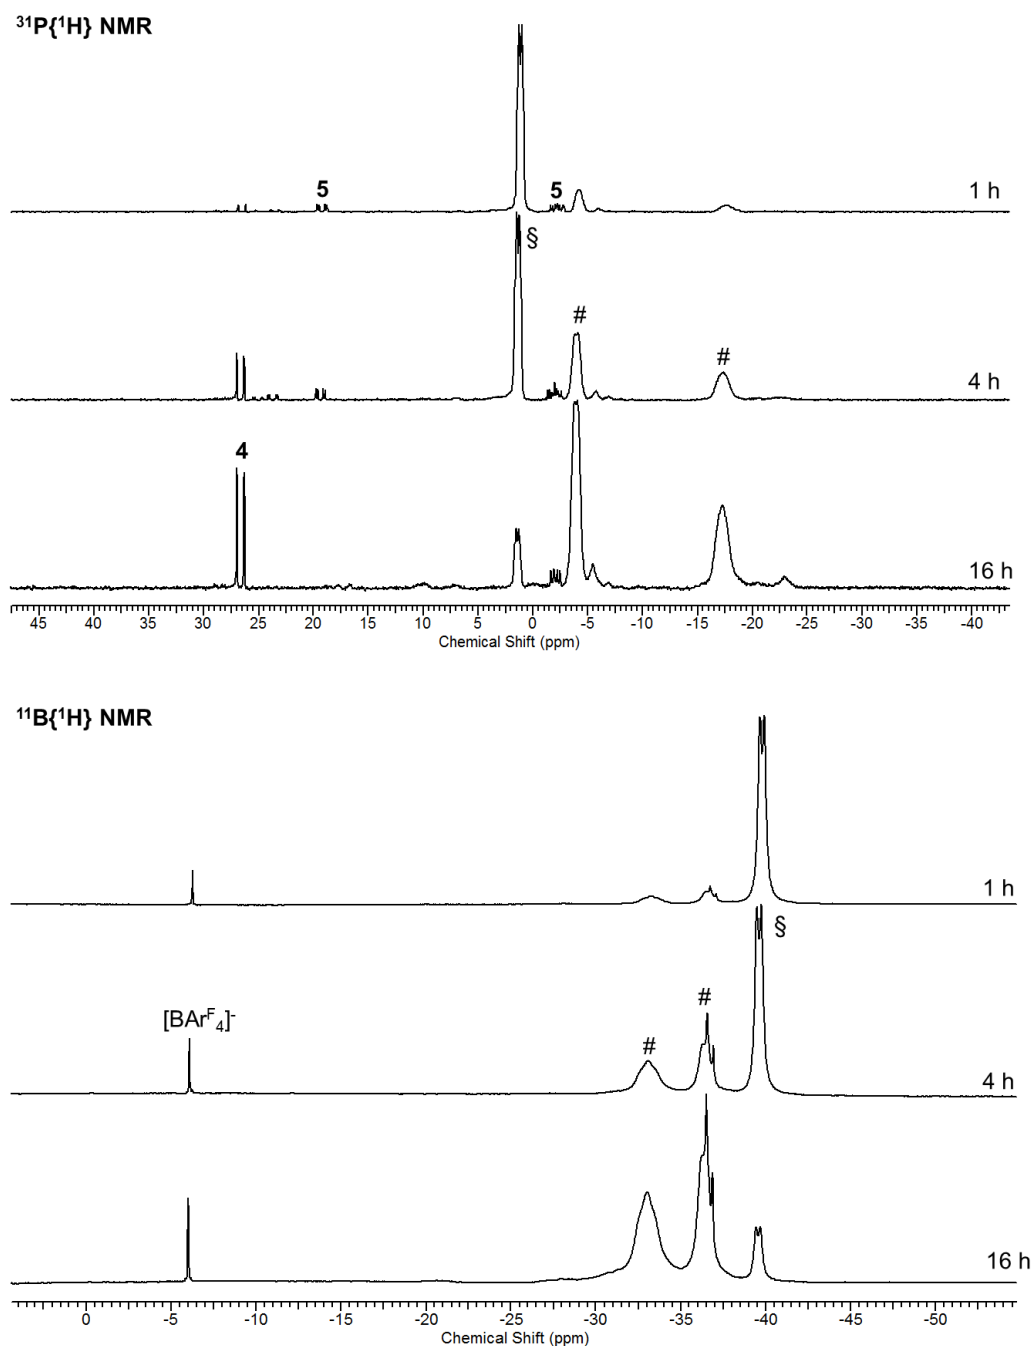

**Figure S9:** Top  $^{31}\text{P}\{^1\text{H}\}$  NMR; and bottom  $^{11}\text{B}\{^1\text{H}\}$  NMR spectra of catalytic dehydrocoupling of  $\text{H}_3\text{B}\cdot\text{PPh}_2\text{H}$  with 5 mol% **1** in toluene at  $100^\circ\text{C}$  measured at 1, 4 and 16 h. Signals corresponding to compounds **4** and **5** are labelled. Signals corresponding to  $\text{H}_3\text{B}\cdot\text{PPh}_2\text{H}$  (§) and  $\text{H}_3\text{B}\cdot\text{PPh}_2\text{BH}_2\cdot\text{PPh}_2\text{H}$  (#) are labelled.

## Addition of Mercury Catalytic Dehydrocoupling of $\text{H}_3\text{B}\cdot\text{PPh}_2\text{H}$

The reaction was repeated as in scheme S1 with NMR spectra taken to ensure the reaction had begun. Mercury metal (approx.  $0.2 \text{ cm}^3$ ) was added to one sample after 4 hours and the reaction was stirred for a further 20 h at  $100^\circ\text{C}$  and NMR spectra taken of the control and mercury added reactions. The addition of mercury had no measurable effect on the rate of dehydrocoupling.

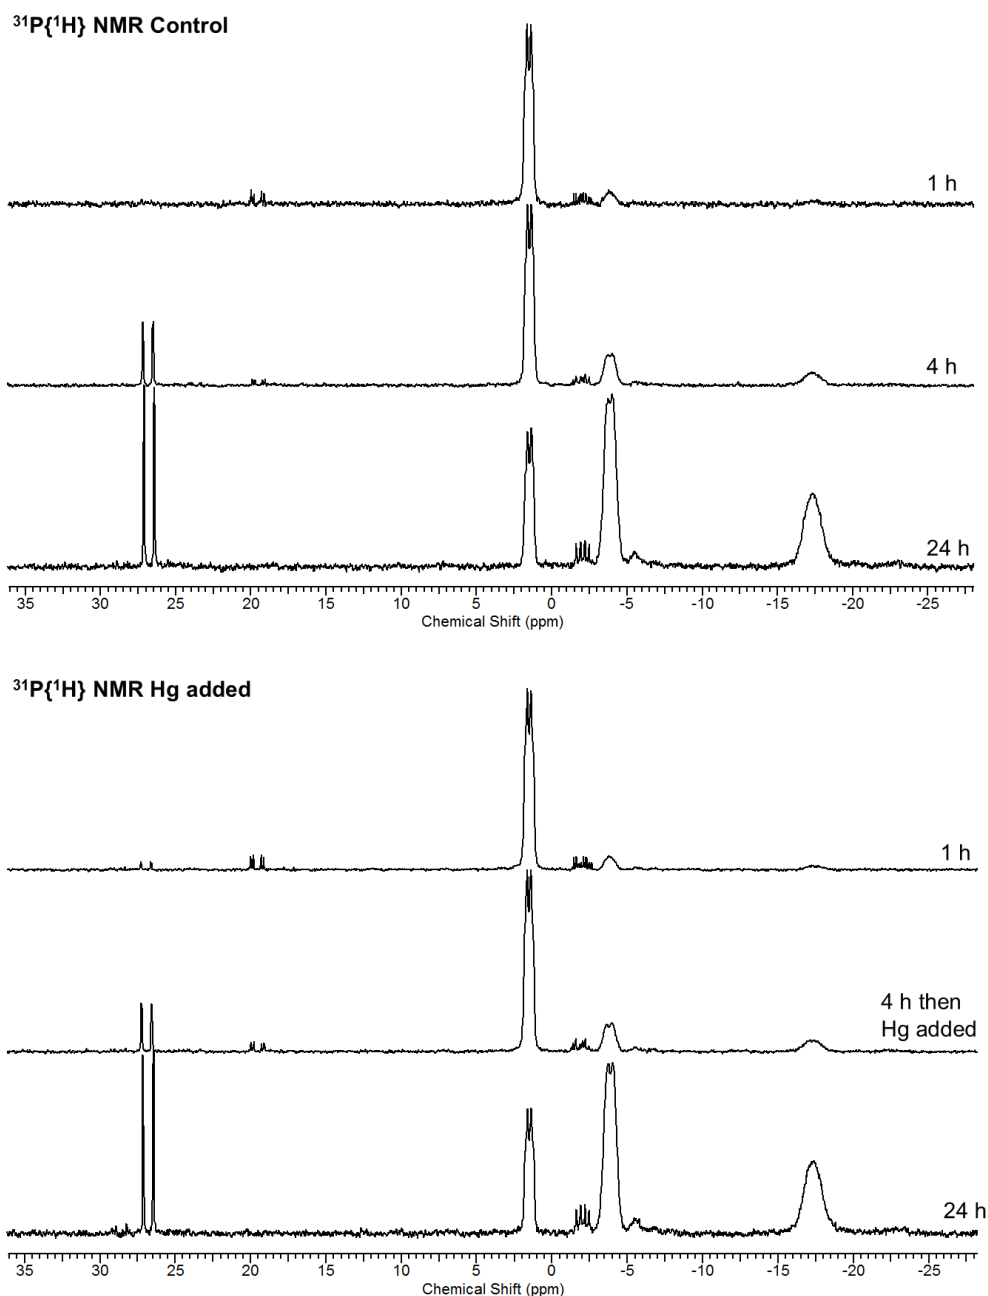

**Figure S10:**  $^{31}\text{P}\{^1\text{H}\}$  NMR spectra of catalytic dehydrocoupling of  $\text{H}_3\text{B}\cdot\text{PPh}_2\text{H}$  with 5 mol% **1** in toluene at  $100^\circ\text{C}$  measured at 1, 4 and 24 h. Top, control reaction and bottom, reaction with mercury added after 4 h.

**$^1\text{H}\{^{11}\text{B}\}$  NMR Steady State Spin Saturation Experiment to Determine Degenerate Exchange in  $[\text{RhCp}^*(\text{PPh}_2\text{-BH}_3)(\text{PMe}_3)][\text{BAR}^{\text{F}}_4]$  (**6**)**

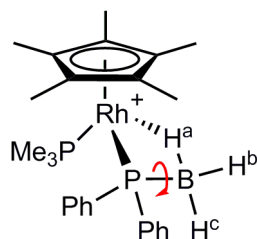

**Scheme S2:** Degenerate exchange of B-H environments in **6**.  $[\text{BAR}^{\text{F}}_4]^-$  not shown.

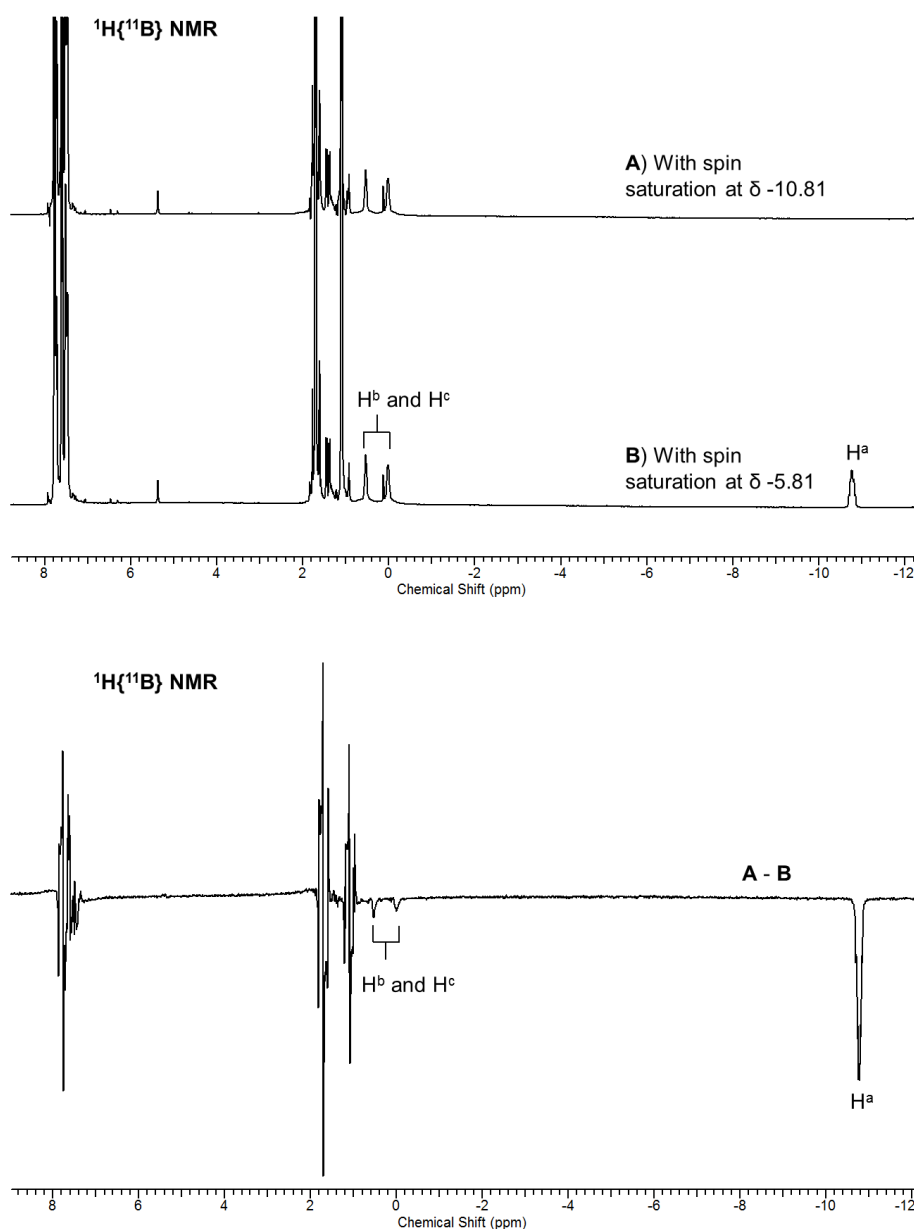

**Figure S11:** Top,  $^1\text{H}\{^{11}\text{B}\}$  NMR spectra **6** in  $\text{CD}_2\text{Cl}_2$  at  $25^\circ\text{C}$  with spin saturation at  $\delta -10.81$  and  $-5.81$ . Bottom, subtraction of the spectra with negative peaks for  $\text{H}^a$ ,  $\text{H}^b$  and  $\text{H}^c$ . Peaks with positive and negative regions result from subtraction errors of large peaks.

### Decomposition of 6 to form 5 – Boron Containing Products

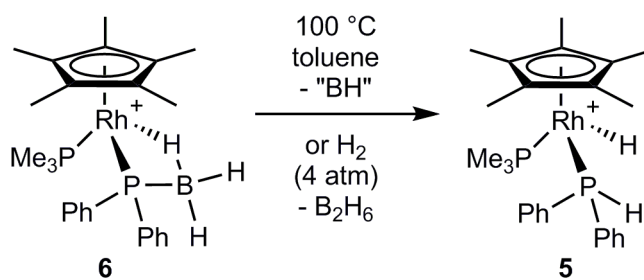

**Scheme S3:** Decomposition of **6** to form **5**. [BAR<sup>F</sup><sub>4</sub>]<sup>-</sup> anions not shown.

<sup>11</sup>B{<sup>1</sup>H} NMR

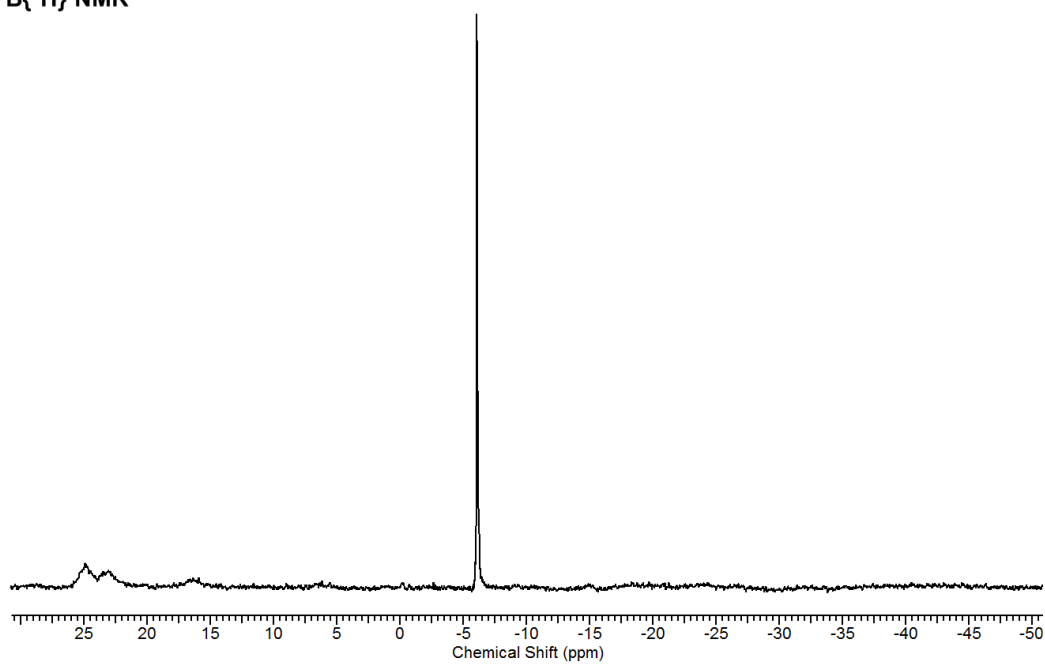

**Figure S12:** <sup>11</sup>B{<sup>1</sup>H} NMR spectrum of the reaction mixture after heating **6** in toluene at 100 °C for 4 h to form **5**.

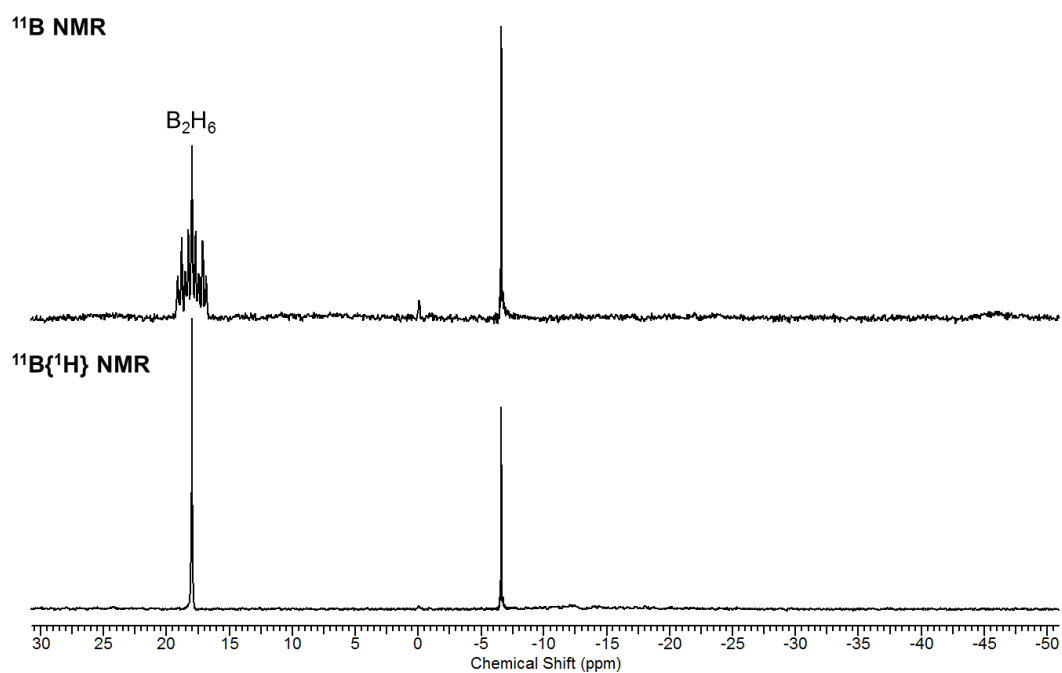

**Figure S13:**  $^{11}\text{B}$  (top) and  $^{11}\text{B}\{^1\text{H}\}$  NMR (bottom) spectra of the reaction mixture after mixing **6** with  $\text{H}_2$  (4 atm) in fluorobenzene at  $25^\circ\text{C}$  for 16 h to form **5**. Product characterised as  $\text{B}_2\text{H}_6$ .<sup>7</sup>

**NMR spectra from Reaction of 1 with  $\text{D}_3\text{B}\cdot\text{PPh}_2\text{H}$**

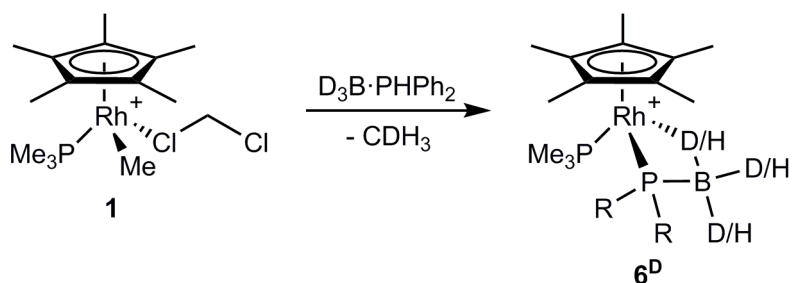

**Scheme S4:** Reaction of **1** with  $\text{D}_3\text{B}\cdot\text{PPh}_2\text{H}$  to form **6<sup>D</sup>** and  $\text{CDH}_3$ .  $[\text{BAr}_4^{\text{F}}]^-$  anions not shown.

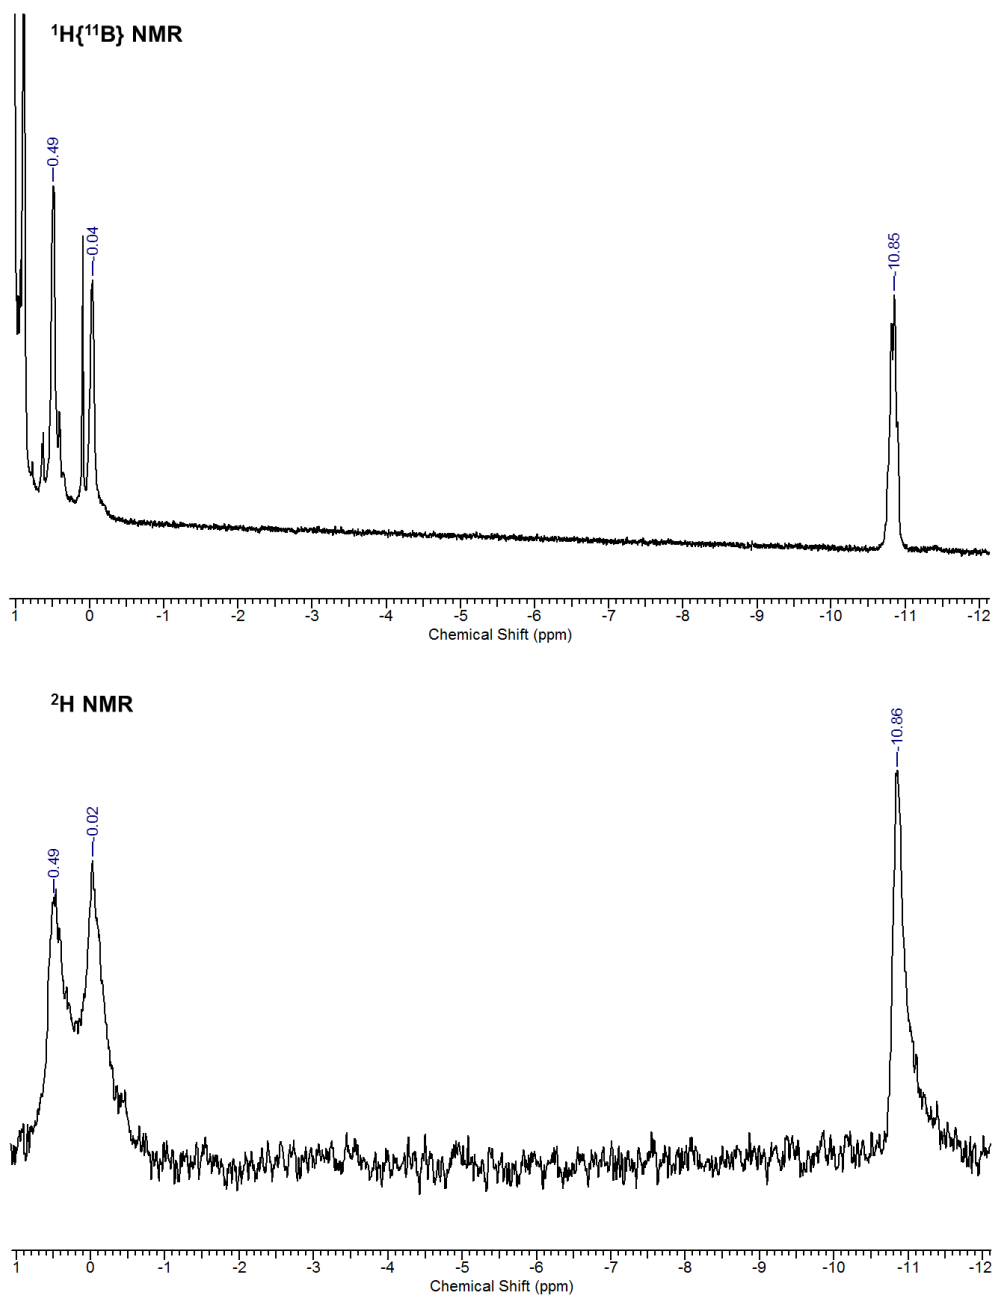

**Figure S14:**  $^1\text{H}\{^{11}\text{B}\}$  (top) and  $^2\text{H}$  NMR (bottom) spectra (upfield region) of the reaction mixture **1** with  $\text{D}_3\text{B}\cdot\text{PPh}_2$  to form **6<sup>D</sup>** showing H and D in each of the 3 B-H environments.



<sup>1</sup>H NMR

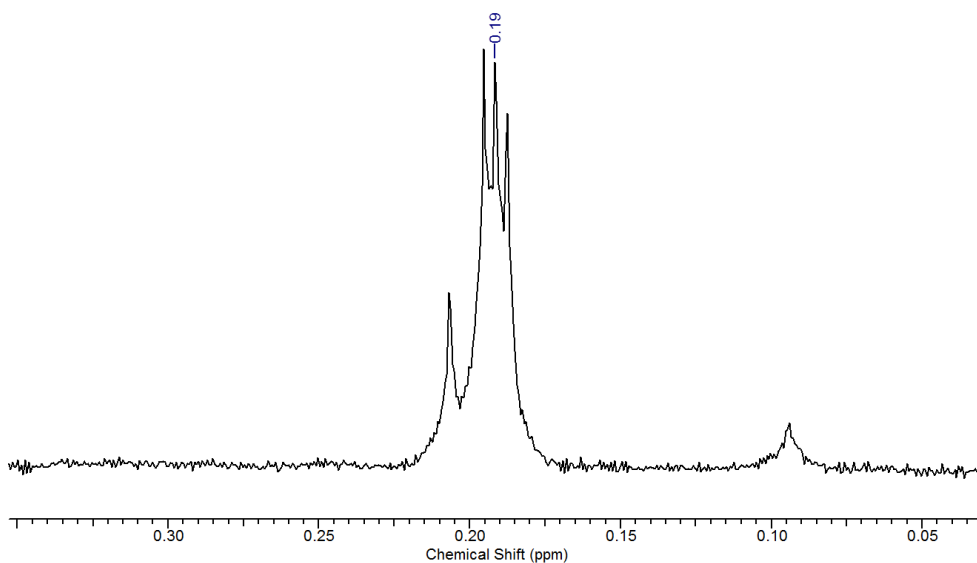

**Figure S15:** <sup>1</sup>H NMR spectrum showing CDH<sub>3</sub> product from reaction of **1** with D<sub>3</sub>B·PPh<sub>2</sub>. δ = 0.19 (<sup>2</sup>J<sub>HD</sub> = 2.0 Hz).<sup>8</sup> This peak was not observed after degassing of the sample.

**Reaction of 1 with H<sub>3</sub>B·P<sup>t</sup>Bu<sub>2</sub>H Followed by <sup>31</sup>P{<sup>1</sup>H} NMR spectroscopy**

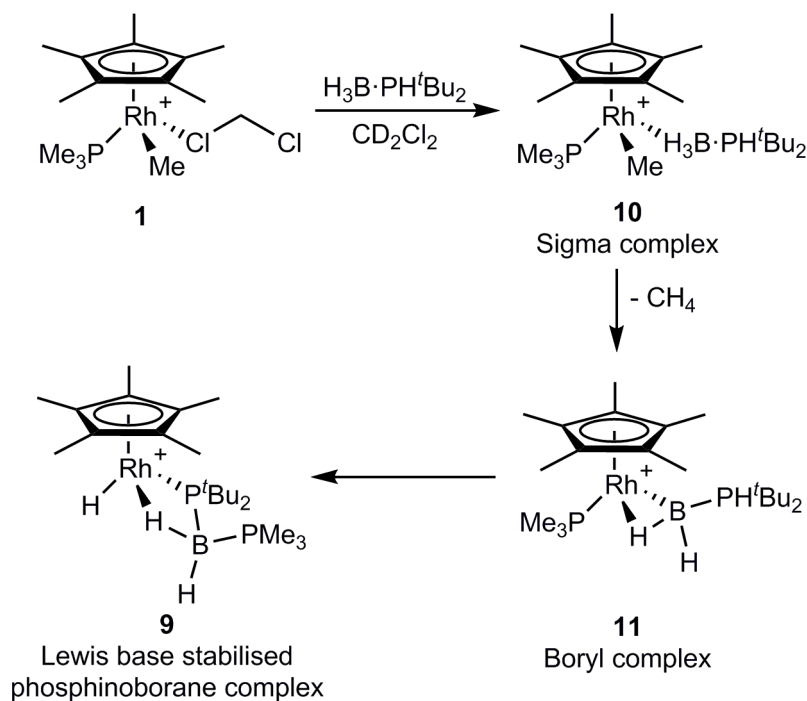

**Scheme S5:** Reaction of **1** with H<sub>3</sub>B·P<sup>t</sup>Bu<sub>2</sub>H followed by NMR spectroscopy. [BAR<sup>F</sup><sub>4</sub>]<sup>-</sup> anions not shown.

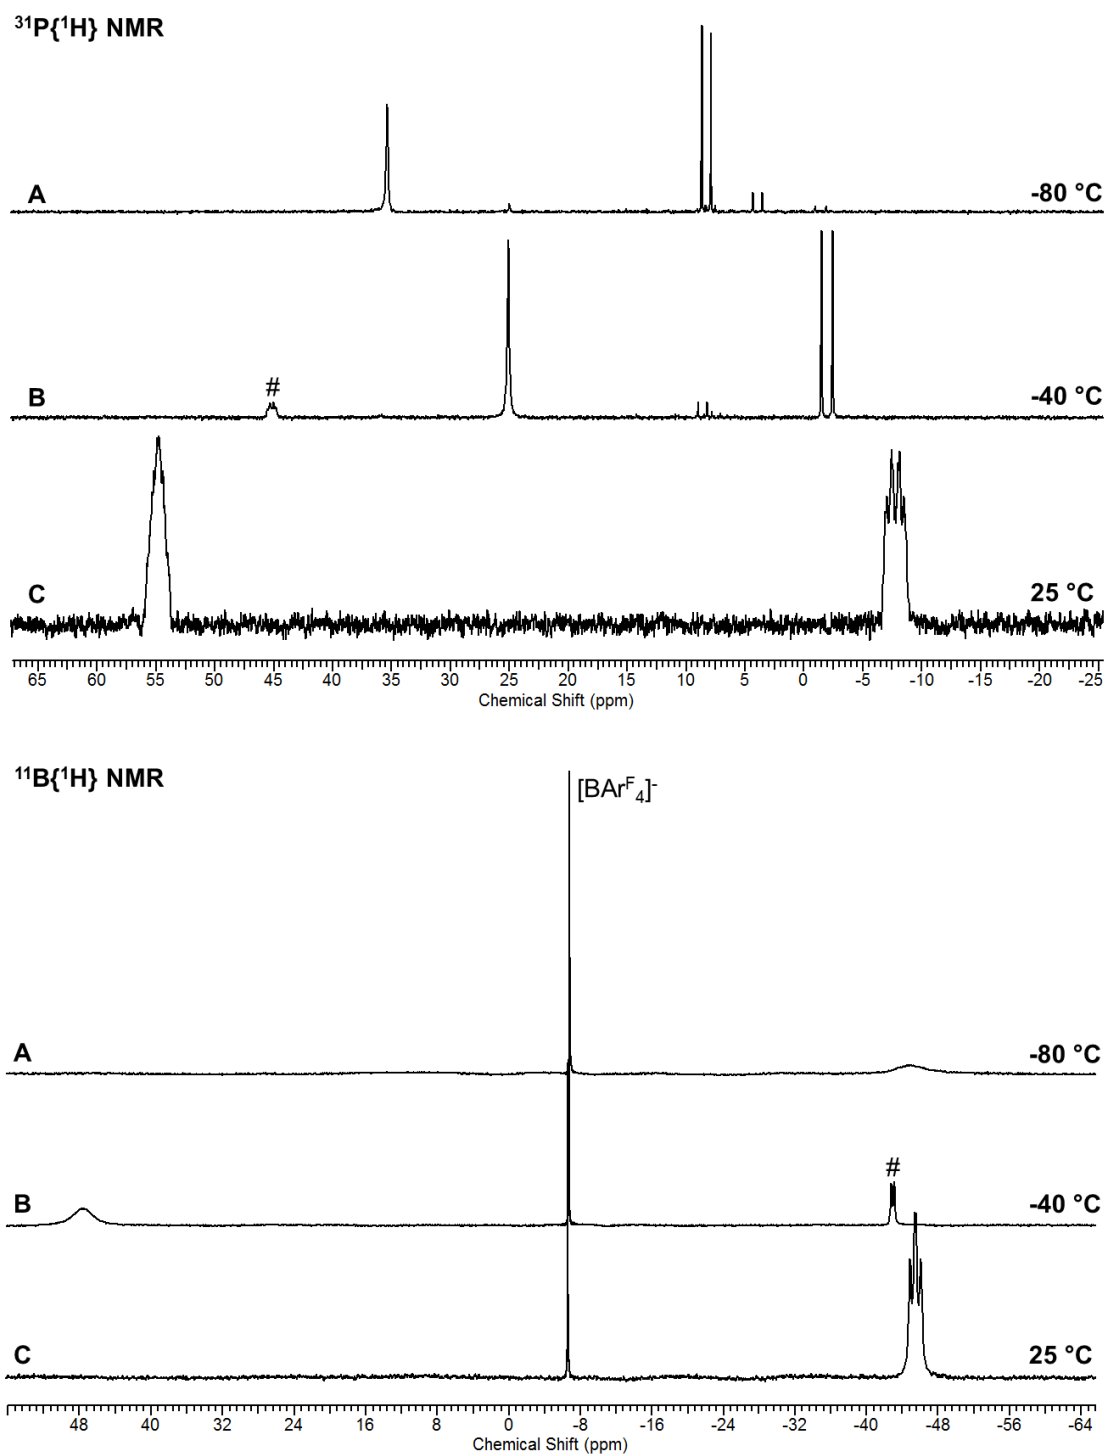

**Figure S16:** <sup>31</sup>P{<sup>1</sup>H} NMR (top) and <sup>11</sup>B{<sup>1</sup>H} NMR (bottom) spectra of reaction products from **1** and H<sub>3</sub>B·P<sup>*t*</sup>Bu<sub>2</sub>H. **A**) Sigma complex [RhCp\*Me(PMe<sub>3</sub>)(H<sub>3</sub>B·P<sup>*t*</sup>Bu<sub>2</sub>H)][BAr<sup>F</sup><sub>4</sub>]<sup>-</sup> (**10**) at -80 °C; **B**) Boryl complex [RhCp\*(PMe<sub>3</sub>)(H<sub>2</sub>B·P<sup>*t*</sup>Bu<sub>2</sub>H)][BAr<sup>F</sup><sub>4</sub>]<sup>-</sup> (**11**) at -40 °C; **C**) Lewis base stabilised phosphinoborane complex [RhCp\*H(P<sup>*t*</sup>Bu<sub>2</sub>BH<sub>2</sub>·PMe<sub>3</sub>)] [BAr<sup>F</sup><sub>4</sub>]<sup>-</sup> (**9**) at 25 °C (isolated material). Signals from free H<sub>3</sub>B·P<sup>*t*</sup>Bu<sub>2</sub>H labelled by #.

**$^1\text{H}$  NMR Spectra of  $[\text{RhCp}^*(\text{H}_2\text{B}\cdot\text{PCy}_3)(\text{PMe}_3)][\text{BAR}^{\text{F}}_4]$  (**12**) under  $\text{H}_2$  (4 atm) to form  $[\text{RhCp}^*\text{H}(\text{H}_3\text{B}\cdot\text{PCy}_3)(\text{PMe}_3)][\text{BAR}^{\text{F}}_4]$  (**13**) at 25 and  $-60$  °C**

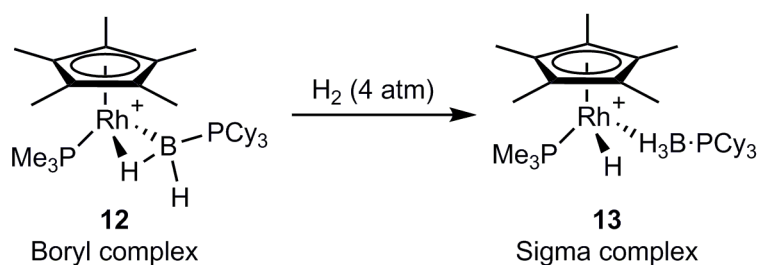

**Scheme S6:** Reaction of **12** with  $\text{H}_2$  to form **13**.  $[\text{BAR}^{\text{F}}_4]^-$  anions not shown.

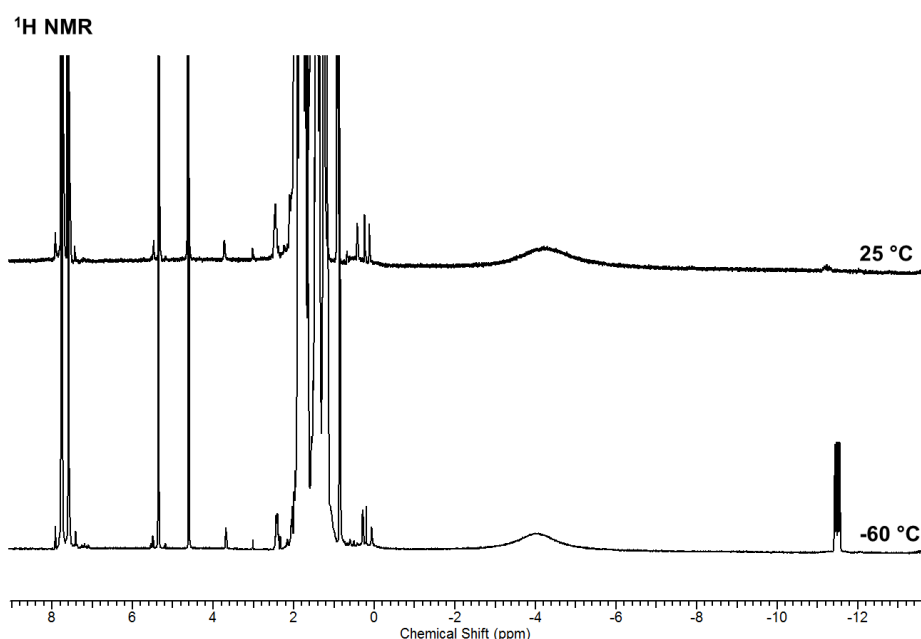

**Figure S17:**  $^1\text{H}$  NMR spectra of **12** under  $\text{H}_2$  (4 atm) to form **13** at 25 and  $-60$  °C showing dynamic exchange process of Rh-H and B-H environments at 25 °C.

**Addition of  $\text{PPh}_3$  to  $[\text{RhCp}^*(\text{H}_2\text{B}\cdot\text{PCy}_3)(\text{PMe}_3)][\text{BAR}^{\text{F}}_4]$  (**12**) to form  $[\text{RhCp}^*(\text{H}_2\text{B}\cdot\text{PCy}_3)(\text{PMe}_3)(\text{PPh}_3)][\text{BAR}^{\text{F}}_4]$  (**14**)**

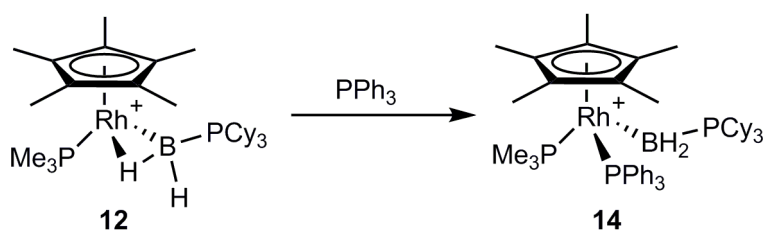

**Scheme S7:** Reaction of **12** with  $\text{PPh}_3$  to form **14**.  $[\text{BAR}^{\text{F}}_4]^-$  anions not shown.

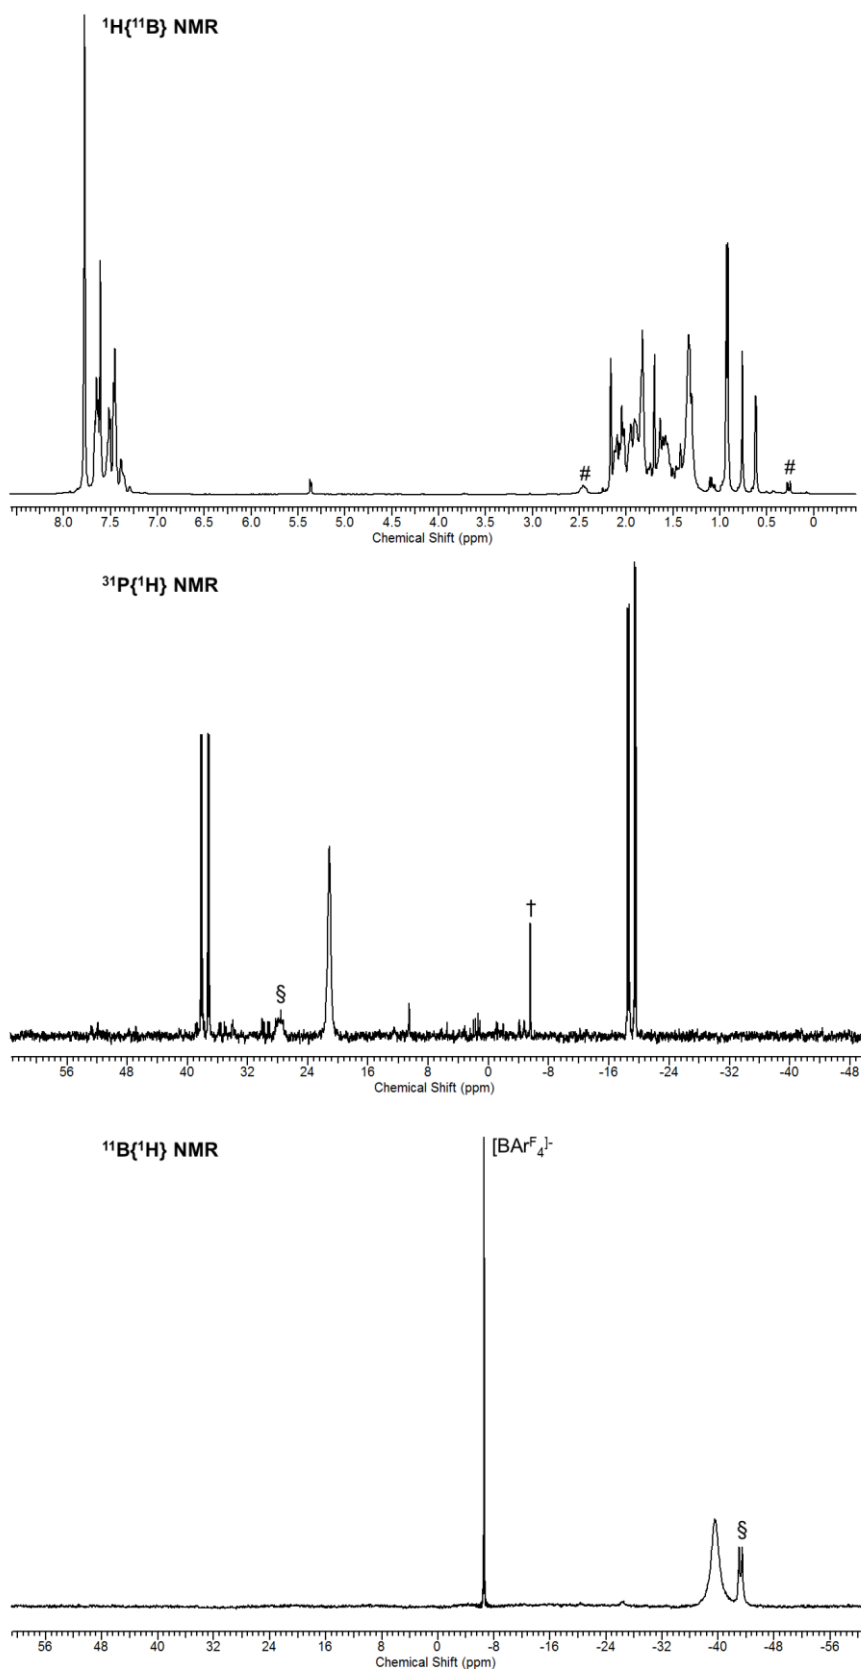

**Figure S18:** NMR spectra of isolated from reaction of 12 with  $\text{PPh}_3$ . Top,  $^1\text{H}\{^{11}\text{B}\}$  NMR spectrum, B-H signals labelled with #; middle,  $^{31}\text{P}\{^1\text{H}\}$  NMR spectrum; bottom,  $^{11}\text{B}\{^1\text{H}\}$  NMR spectrum. Signals from free  $\text{H}_3\text{B}\cdot\text{PCy}_3$  labelled by § and  $\text{PPh}_3$  labelled by †.

## Phosphine Exchange through Vacant Site Formation in $[\text{RhCp}^*(\text{H})(\text{PPh}_2)(\text{PMe}_3)][\text{BAR}^{\text{F}}_4]$ (**5**)

The formation of vacant sites (and hence an active catalytic species) in **5** was probed using a phosphine exchange experiment. **5** was mixed with  $\text{PPh}_3$  (10 eq.) in toluene at room temperature for 2 hours (scheme S8). An ESI-MS experiment (figure S19) then showed several organometallic species resulting from phosphine exchange.

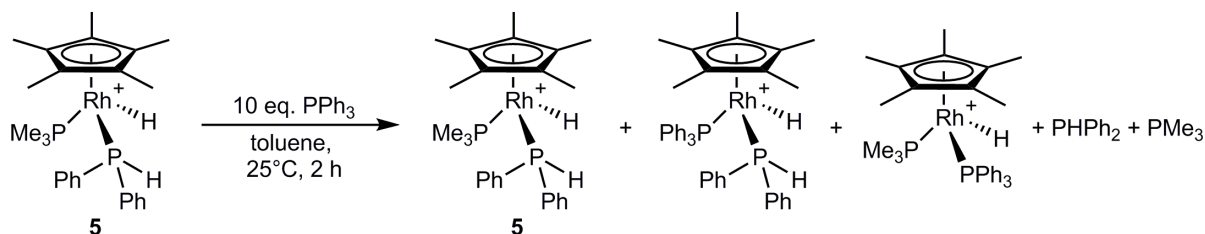

**Scheme S8:** Reaction of **5** with  $\text{PPh}_3$  to form products resulting from ligand scrambling.  $[\text{BAR}^{\text{F}}_4]^-$  anions not shown.

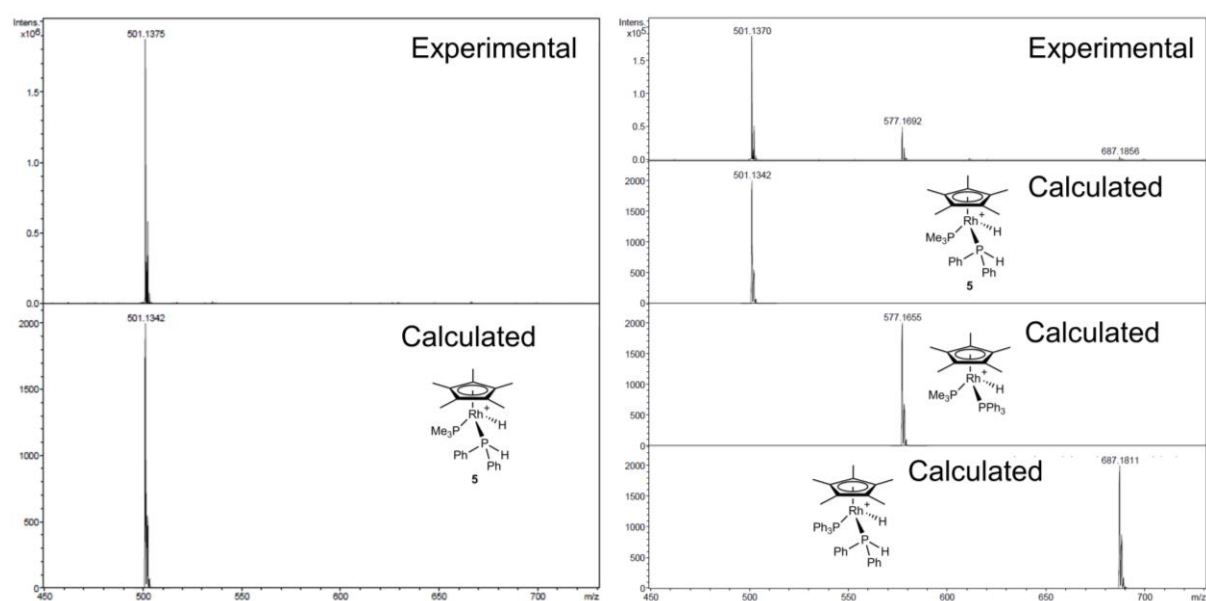

**Figure S19:** ESI-MS spectra (toluene) showing **5** before the reaction (left) and product mixture (right) after 2 h mixing in toluene.

## Experimental References

1. A. B. Pangborn, M. A. Giardello, R. H. Grubbs, R. K. Rosen, F. J. Timmers, *Organometallics*, 1996, **15**, 1518.
2. H. Schmidbaur, E. Weiss, G. Muller, *Synth. React. Inorg. Met.-Org. Chem.*, **1985**, 401.
3. F. L. Taw, H. Mellows, P. S. White, F. J. Hollander, R. G. Bergman, M. Brookhart and D. M. Heinekey, *J. Am. Chem. Soc.*, 2002, **124**, 5100.
4. J. Cosier and A. M. Glazer, *J. App. Cryst.*, 1986, **19**, 105.
5. Z. Otwinowski and W. Minor, in *Macromolecular Crystallography, Pt A*, 1997, vol. 276, pp. 307.
6. G. M. Sheldrick, *Acta Cryst.*, 2008, **A64**, 112.
7. D.F. Gaines, *Inorg. Chem.*, 1963, **2**, 523.
8. H.C. Lo, M.A. Iron, J.M.L. Martin and E. Keinan, *Chem. Eur. J.*, 2007, **13**, 2812.

## Computational Details

Calculations were run with Gaussian 03 Revision D.01<sup>1</sup> with PCM solvent corrections run with Gaussian 09, Revision D.01.<sup>2</sup> Geometry optimisations were performed using the BP86 functional<sup>3</sup> with Rh and P centres described with the Stuttgart RECPs and associated basis sets<sup>4</sup> (with added d-orbital polarisation on P ( $\zeta = 0.387$ )<sup>5</sup> and 6-31G\*\* basis sets for all other atoms.<sup>6</sup> All stationary points were fully characterized via analytical frequency calculations as either minima (all positive eigenvalues) or transition states (one negative eigenvalue) and IRC calculations and subsequent geometry optimizations were used to confirm the minima linked by each transition state. Frequency calculations also provided a free energy in the gas-phase, computed at 298.15 K and 1 atm. Energies reported in the text are based on the gas-phase free energies and incorporate a correction for dispersion effects using Grimme's D3 parameter set<sup>7</sup> (i.e. BP86-D3) as well as solvation (PCM approach) in CH<sub>2</sub>Cl<sub>2</sub>.

All geometries are provided as sets of Cartesian coordinates as well as the separate file All\_PB\_geometries.xyz readable by Chemcraft and Mercury.

## Computational References

1. Gaussian 03, Revision D.01, M. J. Frisch, G. W. Trucks, H. B. Schlegel, G. E. Scuseria, M. A. Robb, J. R. Cheeseman, J. A. Montgomery, Jr., T. Vreven, K. N. Kudin, J. C. Burant, J. M. Millam, S. S. Iyengar, J. Tomasi, V. Barone, B. Mennucci, M. Cossi, G. Scalmani, N. Rega, G. A. Petersson, H. Nakatsuji, M. Hada, M. Ehara, K. Toyota, R. Fukuda, J. Hasegawa, M. Ishida, T. Nakajima, Y. Honda, O. Kitao, H. Nakai, M. Klene, X. Li, J. E. Knox, H. P. Hratchian, J. B. Cross, C. Adamo, J. Jaramillo, R. Gomperts, R. E. Stratmann, O. Yazyev, A. J. Austin, R. Cammi, C. Pomelli, J. W. Ochterski, P. Y. Ayala, K. Morokuma, G. A. Voth, P. Salvador, J. J. Dannenberg, V. G. Zakrzewski, S. Dapprich, A. D. Daniels, M. C. Strain, O. Farkas, D. K. Malick, A. D. Rabuck, K. Raghavachari, J. B. Foresman, J. V. Ortiz, Q. Cui, A. G. Baboul, S. Clifford, J. Cioslowski, B. B. Stefanov, G. Liu, A. Liashenko, P. Piskorz, I. Komaromi, R. L. Martin, D. J. Fox, T. Keith, M. A. Al-Laham, C. Y. Peng, A. Nanayakkara, M. Challacombe, P. M. W. Gill, B. Johnson, W. Chen, M. W. Wong, C. Gonzalez, and J. A. Pople, Gaussian, Inc., Wallingford CT, 2004.
2. Gaussian 09, Revision D.01, M. J. Frisch, G. W. Trucks, H. B. Schlegel, G. E. Scuseria, M. A. Robb, J. R. Cheeseman, G. Scalmani, V. Barone, B. Mennucci, G. A. Petersson, H. Nakatsuji, M. Caricato, X. Li, H. P. Hratchian, A. F. Izmaylov, J. Bloino, G. Zheng, J. L. Sonnenberg, M. Hada, M. Ehara, K. Toyota, R. Fukuda, J. Hasegawa, M. Ishida, T. Nakajima, Y. Honda, O. Kitao, H. Nakai, T. Vreven, J. A. Montgomery, Jr., J. E. Peralta, F. Ogliaro, M. Bearpark, J. J. Heyd, E. Brothers, K. N. Kudin, V. N. Staroverov, R. Kobayashi, J. Normand, K. Raghavachari, A. Rendell, J. C. Burant, S. S. Iyengar, J. Tomasi, M. Cossi, N. Rega, J. M. Millam, M. Klene, J. E. Knox, J. B. Cross, V. Bakken, C. Adamo, J. Jaramillo, R. Gomperts, R. E. Stratmann, O. Yazyev, A. J. Austin, R. Cammi, C. Pomelli, J. W. Ochterski, R. L. Martin, K. Morokuma, V. G. Zakrzewski, G. A. Voth, P. Salvador, J. J. Dannenberg, S. Dapprich, A. D. Daniels, Ö. Farkas, J. B. Foresman, J. V. Ortiz, J. Cioslowski, and D. J. Fox, Gaussian, Inc., Wallingford CT, 2009.
3. (a) A. D. Becke, *Phys. Rev. A* **1988**, 38, 3098. (b) J. P. Perdew, *Physical Review B* **1986**, 33, 8822.
4. D. Andrae, U. Häußermann, M. Dolg, H. Stoll and H. Preuß, *Theor. Chim. Acta* **1990**, 77, 123.
5. A. Hollwarth, M. Bohme, S. Dapprich, A. W. Ehlers, A. Gobbi, V. Jonas, K. F. Kohler, R. Stegmann, A. Veldkamp and G. Frenking, *Chem. Phys. Lett.* **1993**, 208, 237.
6. (a) W. J. Hehre, R. Ditchfield and J. A. Pople, *J. Chem. Phys.* **1972**, 56, 2257. (b) P. C. Hariharan and J. A. Pople, *Theor. Chim. Acta.* **1973**, 28, 213.
7. S. Grimme, J. Antony, S. Ehrlich and H. Krieg, *J. Chem. Phys.* **2010**, 132, 154104.

## Breakdown of Energy Contributions

The following tables detail the evolution of the relative energies as the successive corrections to the initial SCF energy are included. Terms used are:

|                           |                                                                         |
|---------------------------|-------------------------------------------------------------------------|
| $\Delta E$                | SCF energy computed with the BP86 functional                            |
| $\Delta H$                | Enthalpy at 0 K                                                         |
| $\Delta G$                | Free energy at 298.15 K and 1 atm                                       |
| $\Delta G_{\text{DCM}}$   | Free energy corrected for dichloromethane solvent                       |
| $\Delta G_{\text{D3}}$    | Free energy corrected for dispersion effects                            |
| $\Delta G_{\text{final}}$ | Free energy corrected for dichloroethane solvent and dispersion effects |

$\Delta G_{\text{final}}$  is the final data used in the main article. Compound labels are given in Scheme S9.

**Scheme S9.** Stationary points for the reactions of  $10_{\text{R}}$  to give  $6_{\text{R}}$ ,  $9_{\text{R}}$  and  $11_{\text{R}}$ , where R = Me, Cy, Ph and <sup>t</sup>Bu. The alternative reaction of  $\text{Int}(11''-9')_{\text{R}}$  to  $6_{\text{R}}$  via  $\text{Int}(11''-6)_{\text{R}}$  is also indicated.<sup>a, b</sup>

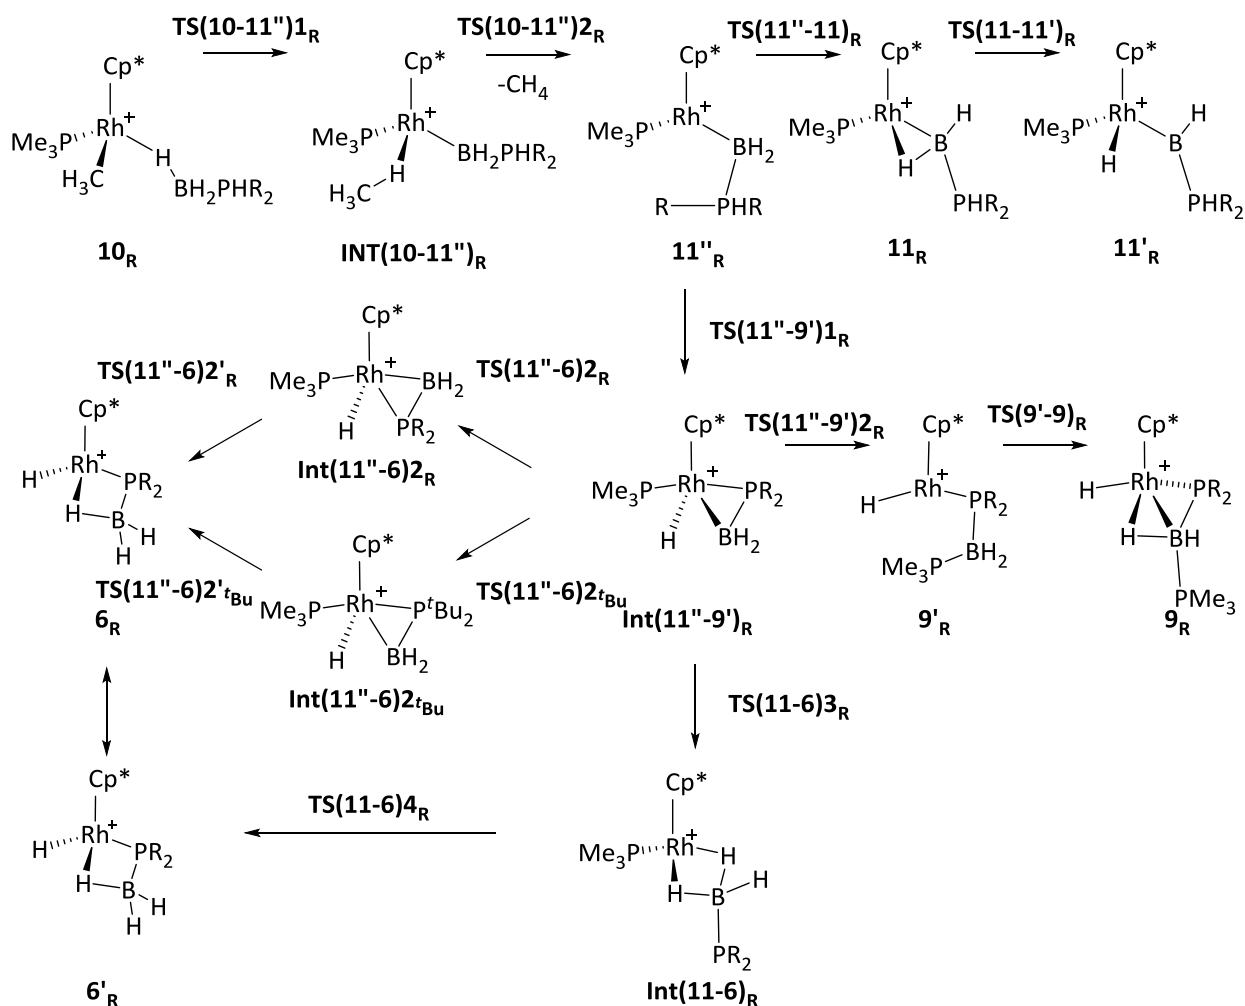

- a. For R = Cy product  $6_{\text{Cy}}$  is equivalent to species 7 in the main paper.  
 b.  $6'_{\text{R}}$  is a higher energy conformer of  $6_{\text{R}}$

**Table S3.** Computed relative energies (kcal/mol) for the reactions of **10<sub>tBu</sub>**. All energies are quoted relative to **10<sub>tBu</sub>** set to 0.0 kcal/mol.

| R = <sup>t</sup> Bu             | $\Delta E$ | $\Delta H$ | $\Delta G$ | $\Delta G_{DCM}$ | $\Delta G_{D3}$ | $\Delta G_{final}$ |
|---------------------------------|------------|------------|------------|------------------|-----------------|--------------------|
| <b>10<sub>R</sub></b>           | 0.00       | 0.00       | 0.00       | 0.00             | 0.00            | 0.00               |
| <b>TS(10-11'')<sub>1R</sub></b> | 17.98      | 16.73      | 18.04      | 17.69            | 14.48           | 14.12              |
| <b>INT(10-11'')<sub>R</sub></b> | 10.48      | 10.66      | 10.59      | 10.09            | 7.43            | 6.92               |
| <b>TS(10-11'')<sub>2R</sub></b> | 10.68      | 10.00      | 9.13       | 8.56             | 6.42            | 5.86               |
| <b>11''<sub>R</sub></b>         | 6.58       | 5.16       | -4.90      | -6.04            | -0.45           | -1.59              |
| <b>TS(11''-11)<sub>R</sub></b>  | 11.20      | 9.28       | -1.04      | -2.35            | 6.84            | 5.52               |
| <b>11<sub>R</sub></b>           | -2.15      | -3.73      | -14.22     | -14.72           | -6.51           | -7.01              |
| <b>TS(11-11')<sub>R</sub></b>   | 1.56       | -1.01      | -10.87     | -11.66           | -3.20           | -3.99              |
| <b>11'<sub>R</sub></b>          | 0.75       | -0.86      | -11.25     | -12.14           | -3.98           | -4.88              |
| <b>TS(11''-9')<sub>1R</sub></b> | 25.94      | 25.06      | 16.91      | 15.02            | 19.10           | 17.20              |
| <b>INT(11''-9')<sub>R</sub></b> | 5.77       | 5.54       | -2.94      | -4.10            | -2.86           | -4.02              |
| <b>TS(11''-6)<sub>2R</sub></b>  | 9.07       | 8.55       | 0.95       | -0.06            | 1.70            | 0.69               |
| <b>INT(11''-6)<sub>2R</sub></b> | 8.50       | 8.34       | -0.33      | -1.36            | -0.26           | -1.29              |
| <b>TS(11''-6)<sub>2'R</sub></b> | 10.10      | 9.72       | 2.32       | 1.24             | 2.91            | 1.83               |
| <b>6<sub>R</sub></b>            | 4.65       | 5.07       | -2.94      | -4.88            | -2.56           | -4.50              |
| <b>6'<sub>R</sub></b>           | 9.12       | 9.45       | 1.67       | -0.22            | 2.74            | 0.85               |
| <b>TS(11''-6)<sub>3R</sub></b>  | 31.90      | 28.45      | 19.46      | 18.74            | 25.34           | 24.63              |
| <b>INT(11''-6)<sub>R</sub></b>  | 5.34       | 3.33       | -6.72      | -9.77            | 1.97            | -1.09              |
| <b>TS(11''-6)<sub>4R</sub></b>  | 18.38      | 16.18      | 6.47       | 4.52             | 13.86           | 11.91              |
| <b>TS(11''-9')<sub>2R</sub></b> | 13.13      | 12.79      | 4.91       | 5.76             | 6.81            | 7.67               |
| <b>9'<sub>R</sub></b>           | 1.30       | 0.07       | -9.31      | -11.34           | -5.50           | -7.53              |
| <b>TS(9'-9)<sub>R</sub></b>     | 3.80       | 1.92       | -8.22      | -10.31           | -2.62           | -4.72              |
| <b>9<sub>R</sub></b>            | -11.00     | -12.27     | -22.17     | -23.57           | -15.47          | -16.88             |



**Table S4.** Computed relative energies (kcal/mol) for the reactions of **10<sub>Ph</sub>**. All energies are quoted relative to **10<sub>Ph</sub>** set to 0.0 kcal/mol.

| R = Ph                          | $\Delta E$ | $\Delta H$ | $\Delta G$ | $\Delta G_{DCM}$ | $\Delta G_{D3}$ | $\Delta G_{final}$ |
|---------------------------------|------------|------------|------------|------------------|-----------------|--------------------|
| <b>10<sub>R</sub></b>           | 0.00       | 0.00       | 0.00       | 0.00             | 0.00            | 0.00               |
| <b>TS(10-11'')<sub>1R</sub></b> | 16.44      | 14.65      | 15.24      | 14.77            | 12.46           | 11.99              |
| <b>INT(10-11'')<sub>R</sub></b> | 6.31       | 6.28       | 6.61       | 5.97             | 2.95            | 2.31               |
| <b>TS(10-11'')<sub>2R</sub></b> | 6.41       | 6.14       | 7.01       | 6.36             | 4.11            | 3.45               |
| <b>11''<sub>R</sub></b>         | 6.49       | 4.65       | -4.68      | -5.74            | -1.36           | -2.42              |
| <b>TS(11''-11)<sub>R</sub></b>  | 9.87       | 7.75       | -2.16      | -3.76            | 5.70            | 4.10               |
| <b>11<sub>R</sub></b>           | -1.64      | -3.08      | -12.62     | -12.92           | -5.42           | -5.72              |
| <b>TS(11-11')<sub>R</sub></b>   | 2.58       | -0.27      | -9.93      | -12.30           | -2.11           | -4.47              |
| <b>11'<sub>R</sub></b>          | 1.79       | -0.01      | -10.50     | -10.82           | -3.11           | -3.42              |
| <b>TS(11''-9')<sub>1R</sub></b> | 5.66       | 4.43       | -4.48      | -6.43            | 0.33            | -1.63              |
| <b>INT(11''-9')<sub>R</sub></b> | -16.67     | -17.49     | -24.91     | -25.55           | -27.35          | -28.00             |
| <b>TS(11''-6)<sub>2R</sub></b>  | -3.31      | -4.48      | -11.44     | -12.10           | -12.02          | -12.68             |
| <b>INT(11''-6)<sub>2R</sub></b> | -5.31      | -6.16      | -13.74     | -14.94           | -16.17          | -17.38             |
| <b>TS(11''-6)<sub>2R</sub></b>  | -5.27      | -6.16      | -12.42     | -13.64           | -14.67          | -15.89             |
| <b>6<sub>R</sub></b>            | -23.29     | -23.96     | -31.67     | -33.29           | -33.67          | -35.29             |
| <b>TS(11''-6)<sub>3R</sub></b>  | 23.76      | 19.96      | 10.57      | 9.36             | 14.97           | 13.76              |
| <b>INT(11''-6)<sub>R</sub></b>  | -3.36      | -5.40      | -15.44     | -17.99           | -9.38           | -11.94             |
| <b>TS(11''-6)<sub>4R</sub></b>  | 12.10      | 9.60       | 0.37       | -1.73            | 7.39            | 5.28               |
| <b>TS(11''-9')<sub>2R</sub></b> | 1.14       | 0.44       | -6.29      | -6.82            | -4.97           | -5.50              |
| <b>9'<sub>R</sub></b>           | -9.77      | -11.81     | -22.41     | -24.69           | -18.12          | -20.40             |
| <b>TS(9'-9)<sub>R</sub></b>     | -8.24      | -10.07     | -18.72     | -20.41           | -12.65          | -14.34             |
| <b>9<sub>R</sub></b>            | -22.95     | -24.26     | -33.38     | -33.96           | -28.26          | -28.84             |

**Table S5.** Computed relative energies (kcal/mol) for the reactions of **10<sub>Cy</sub>**. All energies are quoted relative to **10<sub>Cy</sub>** set to 0.0 kcal/mol.

| <b>R = Cy</b>                   | <b>ΔE</b> | <b>ΔH</b> | <b>ΔG</b> | <b>ΔG<sub>DCM</sub></b> | <b>ΔG<sub>D3</sub></b> | <b>ΔG<sub>final</sub></b> |
|---------------------------------|-----------|-----------|-----------|-------------------------|------------------------|---------------------------|
| <b>10<sub>R</sub></b>           | 0.00      | 0.00      | 0.00      | 0.00                    | 0.00                   | 0.00                      |
| <b>TS(10-11'')<sub>1R</sub></b> | 17.50     | 15.94     | 16.75     | 15.17                   | 13.84                  | 12.27                     |
| <b>INT(10-11'')<sub>R</sub></b> | 9.45      | 9.93      | 10.90     | 10.29                   | 7.97                   | 7.36                      |
| <b>TS(10-11'')<sub>2R</sub></b> | 10.19     | 9.31      | 8.80      | 7.85                    | 7.93                   | 6.97                      |
| <b>11''<sub>R</sub></b>         | 6.20      | 4.05      | -6.28     | -7.37                   | -2.58                  | -3.66                     |
| <b>TS(11''-11)<sub>R</sub></b>  | 11.11     | 8.93      | -1.33     | -2.52                   | 7.76                   | 6.57                      |
| <b>11<sub>R</sub></b>           | -1.78     | -3.48     | -14.34    | -14.76                  | -5.22                  | -5.64                     |
| <b>TS(11-11')<sub>R</sub></b>   | 2.16      | -0.68     | -11.28    | -12.12                  | -2.38                  | -3.21                     |
| <b>11'<sub>R</sub></b>          | 1.54      | -0.22     | -10.57    | -11.27                  | -1.94                  | -2.64                     |
| <b>TS(11''-9')<sub>1R</sub></b> | 8.68      | 6.88      | -2.64     | -4.74                   | 1.84                   | -0.26                     |
| <b>INT(11''-9')<sub>R</sub></b> | -5.29     | -5.41     | -13.23    | -14.70                  | -13.33                 | -14.80                    |
| <b>TS(11''-6)<sub>2R</sub></b>  | 4.13      | 2.84      | -4.69     | -5.64                   | -3.64                  | -4.59                     |
| <b>INT(11''-6)<sub>2R</sub></b> | 2.37      | 1.76      | -6.18     | -7.39                   | -5.42                  | -6.63                     |
| <b>6<sub>R</sub> (=7)</b>       | -14.48    | -14.77    | -23.07    | -25.39                  | -23.09                 | -25.41                    |
| <b>TS(11''-6)<sub>3R</sub></b>  | 26.82     | 22.47     | 11.85     | 10.48                   | 18.73                  | 17.36                     |
| <b>INT(11''-6)<sub>R</sub></b>  | 1.49      | -0.57     | -10.99    | -13.23                  | -2.22                  | -4.47                     |
| <b>TS(11''-6)<sub>4R</sub></b>  | 17.15     | 13.91     | 2.72      | 0.63                    | 11.92                  | 9.83                      |
| <b>TS(11''-9')<sub>2R</sub></b> | 8.71      | 7.26      | -1.39     | -2.81                   | 1.33                   | -0.09                     |
| <b>9'<sub>R</sub></b>           | -2.41     | -4.40     | -14.96    | -17.60                  | -9.70                  | -12.34                    |
| <b>TS(9'-9)<sub>R</sub></b>     | -1.75     | -3.51     | -12.93    | -14.94                  | -5.16                  | -7.17                     |
| <b>9<sub>R</sub></b>            | -14.59    | -16.19    | -26.04    | -27.39                  | -19.56                 | -20.92                    |

**Table S6.** Functional Testing on the Relative Free Energies (kcal/mol) of  $11_{tBu}$ ,  $TS(11-11')_{tBu}$  and  $11'_{tBu}$ .

| Functional    | $11_{tBu}$ | $TS(11-11')_{tBu}$ | $11'_{tBu}$ |
|---------------|------------|--------------------|-------------|
| BP86          | 0.00       | 3.35               | 2.97        |
| BP86-D3(DCM)  | 0.00       | 3.02               | 2.13        |
| PBE0          | 0.00       | 4.18               | -1.11       |
| PBE0-D3(DCM)  | 0.00       | 3.67               | 2.08        |
| B3LYP         | 0.00       | 3.45               | 3.02        |
| B3LYP-D3(DCM) | 0.00       | 2.91               | 1.79        |
| M06           | 0.00       | 10.70              | 6.64        |
| M06(DCM)      | 0.00       | 5.91               | 5.72        |
| B97D          | 0.00       | 3.79               | 0.77        |
| B97D(DCM)     | 0.00       | 3.08               | 0.23        |

**Table S7.** Computed  $^{11}\text{B}$  NMR Chemical Shifts (ppm) for  $10_{\text{R}}$ ,  $11''_{\text{R}}$ ,  $11'_{\text{R}}$ ,  $11_{\text{R}}$ ,  $9_{\text{R}}$  and  $6_{\text{R}}$ .

| Species           | R = Me | R = $t\text{Bu}$ | R = Ph | R = Cy      |
|-------------------|--------|------------------|--------|-------------|
| $10_{\text{R}}$   | -41.07 | -44.76           | -46.13 | -42.84      |
| $11''_{\text{R}}$ | -9.45  | -14.29           | -10.32 | -11.78      |
| $11'_{\text{R}}$  | 115.51 | 119.33           | 112.51 | 114.59      |
| $11_{\text{R}}$   | 49.33  | 53.73            | 51.97  | 53.99       |
| $9_{\text{R}}$    | -48.81 | -49.14           | -49.88 | -49.23      |
| $6_{\text{R}}$    | -51.63 | -37.13           | -52.28 | -49.01 (=7) |

**Table S8.** Functional Testing on the Computed  $^{11}\text{B}$  NMR Chemical Shifts (ppm) of  $11_{t\text{Bu}}$  and  $11'_{t\text{Bu}}$  and  $11''_{t\text{Bu}}$ .<sup>a</sup>

| Methodology         | 11-1   | 11-2   | 11-3  |
|---------------------|--------|--------|-------|
| BP86/BS1//BP86/BS1  | 7.29   | 115.85 | 66.25 |
| BP86/BS2//BP86/BS1  | 15.66  | 134.73 | 79.05 |
| B3LYP/BS2//BP86/BS1 | -14.29 | 119.33 | 53.73 |
| B97D/BS2//BP86/BS1  | 16.46  | 129.04 | 76.64 |
| M06/BS2//BP86/BS1   | 17.92  | 148.80 | 86.77 |
| PBE0/BS2//BP86/BS1  | 10.30  | 144.75 | 79.30 |

- a. BS1 = SDD on Rh and P, with d-orbital polarisation on P; 6-31g\*\* on other atoms;  
BS2 = SDD on Rh and P, with d-orbital polarisation on P; 6-311++g\*\* on other atoms.

**Cartesian Coordinates (Å) and  
computed energies (in Hartrees)  
for all optimised structures. All  
structures can be visualized via  
the All\_PB\_geometries.xyz file  
provided.**

10<sub>tBu</sub>  
 SCF Energy = -1016.40413259  
 Enthalpy 0K = -1015.759217  
 Enthalpy 298K = -1015.717744  
 Free Energy 298K = -1015.828783  
 SCF(DCM) = -1016.44920397  
 SCF(BP86-D3) = -0.12421940  
 Lowest Frequencies = 18.2674  
 26.0989 cm<sup>-1</sup>  
 C -1.90044 -0.93186 1.90629  
 C -1.51515 -2.03622 1.01683  
 C -2.41551 -2.06927 -0.09644  
 C -3.31224 -0.92659 0.03110  
 C -3.01877 -0.27538 1.31715  
 Rh -1.30407 -0.09461 -0.21074  
 B 1.13732 0.31971 0.58719  
 P 2.96585 0.37278 -0.18637  
 C 3.40966 -1.05683 -1.37880  
 C 4.91012 -1.10720 -1.73101  
 C -0.46973 -3.06035 1.34955  
 C -2.50238 -3.12935 -1.15577  
 C -4.53077 -0.69567 -0.81741  
 C -3.87637 0.78201 1.95167  
 C -1.29960 -0.66974 3.25757  
 P -1.47574 2.18005 -0.64321  
 C -3.00049 2.71991 -1.56642  
 C -1.48325 3.29172 0.85237  
 C -0.12211 2.94985 -1.66616  
 C 4.25187 0.73443 1.19084  
 C 3.62008 1.78963 2.13039  
 C 4.54020 -0.55898 1.98206  
 C 5.54648 1.31886 0.58441  
 C 2.95522 -2.39081 -0.74676  
 C 2.59704 -0.77972 -2.66561  
 H -1.55696 -3.68386 -1.26139  
 H -2.76044 -2.70897 -2.14103  
 H -3.28794 -3.86220 -0.89518  
 H -5.34737 -1.37584 -0.51075  
 H -4.32774 -0.88957 -1.88304  
 H -4.91066 0.33324 -0.72555  
 H -4.28076 1.49125 1.21173  
 H -3.33461 1.35182 2.72214  
 H -4.74497 0.30770 2.44555  
 H -1.63996 -1.42601 3.98917  
 H -1.58591 0.31953 3.64658  
 H -0.19879 -0.71264 3.22499  
 H -0.87173 -3.77913 2.08796  
 H 0.42380 -2.59682 1.79620  
 H -0.15839 -3.63699 0.46501  
 H 1.19829 -0.52211 1.45548  
 H 3.14350 1.51462 -1.03703  
 H 2.91995 0.15108 -3.16259

H 1.51375 -0.72109 -2.47473  
 H 2.76416 -1.60914 -3.37611  
 H 5.06343 -1.88349 -2.50239  
 H 5.53939 -1.37951 -0.86882  
 H 5.27409 -0.15370 -2.14854  
 H 1.87962 -2.38235 -0.50674  
 H 3.51255 -2.63194 0.17297  
 H 3.13582 -3.20843 -1.46734  
 H 6.23046 1.59091 1.40846  
 H 5.35011 2.23666 0.00430  
 H 6.07870 0.60694 -0.06217  
 H 2.71658 1.41339 2.63376  
 H 3.36001 2.72076 1.59791  
 H 4.36209 2.04961 2.90649  
 H 3.61787 -1.00915 2.38542  
 H 5.19360 -0.31690 2.83909  
 H 5.06516 -1.31464 1.37527  
 H -0.28717 4.03651 -1.74666  
 H -0.11275 2.51120 -2.67476  
 H 0.84660 2.76240 -1.18026  
 H -2.96776 3.80337 -1.76595  
 H -3.89796 2.49322 -0.97091  
 H -3.06298 2.17369 -2.52004  
 H -0.55926 3.12312 1.42643  
 H -2.34647 3.05720 1.49158  
 H -1.53959 4.34885 0.54391  
 C -1.16932 -0.31251 -2.31502  
 H -2.17223 -0.18159 -2.75578  
 H -0.47927 0.39300 -2.80435  
 H -0.82116 -1.33742 -2.52542  
 H 0.45647 -0.06068 -0.45204  
 H 0.96427 1.44491 0.99519

TS(10-11''')<sub>1tBu</sub>  
 SCF Energy = -1016.37548654  
 Enthalpy 0K = -1015.732552  
 Enthalpy 298K = -1015.691617  
 Free Energy 298K = -1015.800038  
 SCF(DCM) = -1016.42112067  
 SCF(BP86-D3) = -0.12989451  
 Lowest Frequencies = -918.4650  
 21.5576 cm<sup>-1</sup>  
 C -2.27615 -0.50481 1.71895  
 C -1.58852 -1.72462 1.36150  
 C -2.08998 -2.15464 0.08119  
 C -3.17387 -1.25979 -0.31554  
 C -3.29818 -0.25652 0.69519  
 Rh -1.17762 -0.06532 -0.21494  
 B 0.91784 0.25117 0.63719  
 P 2.68931 0.11224 -0.27596  
 C 3.29479 -1.67172 -0.65275  
 C 4.39672 -1.68132 -1.73464  
 C -0.64186 -2.48417 2.24363  
 C -1.73549 -3.42830 -0.63279  
 C -4.04096 -1.44656 -1.52887  
 C -4.40696 0.75057 0.81856  
 C -2.16777 0.20069 3.04279  
 P -1.22047 2.22306 -0.56495  
 C -2.66183 2.81523 -1.59349  
 C -1.31508 3.31548 0.93829  
 C 0.19573 2.96582 -1.51734

|   |          |          |          |
|---|----------|----------|----------|
| C | 3.98345  | 1.18934  | 0.66250  |
| C | 3.59035  | 2.66216  | 0.39986  |
| C | 3.89802  | 0.89390  | 2.17632  |
| C | 5.41697  | 0.95911  | 0.14327  |
| C | 3.78312  | -2.35040 | 0.64533  |
| C | 2.06646  | -2.43801 | -1.19339 |
| H | -0.74346 | -3.80464 | -0.34005 |
| H | -1.74778 | -3.30598 | -1.72874 |
| H | -2.47128 | -4.21788 | -0.39172 |
| H | -4.75989 | -2.27214 | -1.37499 |
| H | -3.44533 | -1.70194 | -2.42249 |
| H | -4.62418 | -0.54195 | -1.76171 |
| H | -4.89736 | 0.94997  | -0.14673 |
| H | -4.06490 | 1.70898  | 1.24101  |
| H | -5.18376 | 0.36183  | 1.50305  |
| H | -2.75708 | -0.32656 | 3.81630  |
| H | -2.54828 | 1.23285  | 2.99127  |
| H | -1.12414 | 0.24413  | 3.39229  |
| H | -1.21018 | -3.18978 | 2.87822  |
| H | -0.07895 | -1.81509 | 2.91182  |
| H | 0.08461  | -3.07565 | 1.66414  |
| H | 1.03471  | -0.61642 | 1.47690  |
| H | 2.77322  | 0.70537  | -1.58349 |
| H | 1.70538  | -2.01868 | -2.14778 |
| H | 1.23307  | -2.43789 | -0.47292 |
| H | 2.35763  | -3.48640 | -1.38686 |
| H | 4.64418  | -2.73020 | -1.97964 |
| H | 5.32569  | -1.19251 | -1.40900 |
| H | 4.05903  | -1.19713 | -2.66689 |
| H | 3.02046  | -2.31740 | 1.44139  |
| H | 4.71144  | -1.90162 | 1.03271  |
| H | 3.99876  | -3.41296 | 0.43318  |
| H | 6.09249  | 1.67387  | 0.64736  |
| H | 5.50303  | 1.13509  | -0.94227 |
| H | 5.79080  | -0.05177 | 0.36864  |
| H | 2.58211  | 2.89344  | 0.77943  |
| H | 3.64290  | 2.92252  | -0.67166 |
| H | 4.30243  | 3.31788  | 0.93235  |
| H | 2.88220  | 1.06325  | 2.56766  |
| H | 4.58669  | 1.57283  | 2.71030  |
| H | 4.19647  | -0.13761 | 2.42051  |
| H | 0.03923  | 4.04993  | -1.63955 |
| H | 0.25506  | 2.49995  | -2.51302 |
| H | 1.13676  | 2.79284  | -0.97828 |
| H | -2.61038 | 3.90768  | -1.73267 |
| H | -3.61058 | 2.55876  | -1.10141 |
| H | -2.63139 | 2.32539  | -2.57969 |
| H | -0.46414 | 3.09116  | 1.59862  |
| H | -2.24919 | 3.11453  | 1.48476  |
| H | -1.29242 | 4.37811  | 0.64595  |
| C | -0.61691 | -0.35375 | -2.36475 |
| H | -1.51438 | 0.10684  | -2.80301 |
| H | 0.25835  | 0.10188  | -2.85926 |
| H | -0.61270 | -1.43307 | -2.57076 |
| H | 0.15248  | -0.22619 | -1.10790 |
| H | 0.97138  | 1.37029  | 1.11160  |

INT(10-11'')<sub>tBu</sub>  
SCF Energy = -1016.38743453  
Enthalpy 0K = -1015.742225  
Enthalpy 298K = -1015.700097

Free Energy 298K = -1015.811899  
SCF(DCM) = -1016.43330718  
SCF(BP86-D3) = -0.12926813  
Lowest Frequencies = 19.6340  
28.5919 cm-1

|    |          |          |          |
|----|----------|----------|----------|
| C  | -2.09511 | -0.52098 | 1.70054  |
| C  | -1.50176 | -1.78479 | 1.27200  |
| C  | -2.12302 | -2.13306 | 0.03302  |
| C  | -3.22910 | -1.19827 | -0.24000 |
| C  | -3.23527 | -0.23158 | 0.79162  |
| Rh | -1.14292 | -0.03746 | -0.16507 |
| B  | 0.87641  | 0.35054  | 0.70096  |
| P  | 2.60546  | 0.08331  | -0.25757 |
| C  | 3.16136  | -1.73045 | -0.56269 |
| C  | 4.26210  | -1.83347 | -1.64130 |
| C  | -0.56016 | -2.62783 | 2.08036  |
| C  | -1.85954 | -3.36591 | -0.78258 |
| C  | -4.20620 | -1.33502 | -1.37362 |
| C  | -4.29094 | 0.80405  | 1.05146  |
| C  | -1.85956 | 0.12015  | 3.03720  |
| P  | -1.17282 | 2.25030  | -0.51792 |
| C  | -2.67031 | 2.84392  | -1.46682 |
| C  | -1.19928 | 3.36632  | 0.97063  |
| C  | 0.18898  | 2.98432  | -1.55536 |
| C  | 3.97679  | 1.17250  | 0.56141  |
| C  | 3.63674  | 2.63949  | 0.20883  |
| C  | 3.92238  | 0.98549  | 2.09400  |
| C  | 5.38854  | 0.85510  | 0.02985  |
| C  | 3.62354  | -2.36501 | 0.76622  |
| C  | 1.90865  | -2.47295 | -1.07902 |
| H  | -0.86230 | -3.78852 | -0.58997 |
| H  | -1.95229 | -3.17348 | -1.86417 |
| H  | -2.60454 | -4.14479 | -0.53296 |
| H  | -4.95056 | -2.12511 | -1.16140 |
| H  | -3.70702 | -1.61500 | -2.31694 |
| H  | -4.76088 | -0.40035 | -1.55138 |
| H  | -4.86931 | 1.04603  | 0.14621  |
| H  | -3.87504 | 1.73844  | 1.46081  |
| H  | -5.00668 | 0.42092  | 1.80297  |
| H  | -2.40971 | -0.42669 | 3.82668  |
| H  | -2.20245 | 1.16605  | 3.06168  |
| H  | -0.78979 | 0.10473  | 3.29713  |
| H  | -1.11773 | -3.14449 | 2.88383  |
| H  | 0.22716  | -2.02256 | 2.55676  |
| H  | -0.07415 | -3.40434 | 1.46973  |
| H  | 1.01508  | -0.39499 | 1.65606  |
| H  | 2.64641  | 0.59758  | -1.60060 |
| H  | 1.60109  | -2.10564 | -2.07264 |
| H  | 1.05521  | -2.36665 | -0.39079 |
| H  | 2.14719  | -3.54715 | -1.18571 |
| H  | 4.44029  | -2.90149 | -1.86375 |
| H  | 5.22123  | -1.40170 | -1.32440 |
| H  | 3.95788  | -1.34752 | -2.58431 |
| H  | 2.86031  | -2.26705 | 1.55600  |
| H  | 4.56422  | -1.92637 | 1.13561  |
| H  | 3.80628  | -3.44293 | 0.60684  |
| H  | 6.09829  | 1.58477  | 0.46074  |
| H  | 5.45517  | 0.94173  | -1.06763 |
| H  | 5.73791  | -0.14593 | 0.32772  |
| H  | 2.65042  | 2.93993  | 0.59732  |
| H  | 3.66928  | 2.82357  | -0.87931 |

|   |          |          |          |
|---|----------|----------|----------|
| H | 4.38996  | 3.29936  | 0.67583  |
| H | 2.92338  | 1.21764  | 2.49597  |
| H | 4.64908  | 1.67270  | 2.56335  |
| H | 4.18955  | -0.03792 | 2.40171  |
| H | 0.02782  | 4.06808  | -1.67548 |
| H | 0.18797  | 2.51082  | -2.54912 |
| H | 1.15923  | 2.80948  | -1.07198 |
| H | -2.63180 | 3.93791  | -1.59906 |
| H | -3.58975 | 2.57914  | -0.92575 |
| H | -2.69223 | 2.36329  | -2.45707 |
| H | -0.32176 | 3.15468  | 1.59811  |
| H | -2.11151 | 3.17979  | 1.55776  |
| H | -1.18916 | 4.42247  | 0.65528  |
| C | -0.59729 | -0.40456 | -2.84389 |
| H | -1.65548 | -0.11679 | -2.87221 |
| H | -0.01657 | 0.24563  | -3.51485 |
| H | -0.48750 | -1.45671 | -3.14084 |
| H | -0.10888 | -0.30470 | -1.82238 |
| H | 1.01730  | 1.50812  | 1.06537  |

TS(10-11''')<sub>2tBu</sub>

SCF Energy = -1016.38711640  
 Enthalpy 0K = -1015.743277  
 Enthalpy 298K = -1015.701092  
 Free Energy 298K = -1015.814235  
 SCF(DCM) = -1016.43309218  
 SCF(BP86-D3) = -0.12853091  
 Lowest Frequencies = -82.0360  
 15.5675 cm<sup>-1</sup>

|    |          |          |          |
|----|----------|----------|----------|
| C  | -2.13242 | -0.53258 | 1.70190  |
| C  | -1.51565 | -1.79114 | 1.28583  |
| C  | -2.09453 | -2.13053 | 0.02532  |
| C  | -3.19826 | -1.19964 | -0.27908 |
| C  | -3.24676 | -0.24280 | 0.75713  |
| Rh | -1.11859 | -0.02005 | -0.10621 |
| B  | 0.87683  | 0.36246  | 0.76610  |
| P  | 2.57956  | 0.08451  | -0.23103 |
| C  | 3.09643  | -1.73528 | -0.56280 |
| C  | 4.17031  | -1.84935 | -1.66680 |
| C  | -0.59172 | -2.62825 | 2.12039  |
| C  | -1.80032 | -3.35290 | -0.79461 |
| C  | -4.13421 | -1.33605 | -1.44664 |
| C  | -4.31369 | 0.78685  | 0.99174  |
| C  | -1.94874 | 0.10320  | 3.04805  |
| P  | -1.15097 | 2.26163  | -0.50078 |
| C  | -2.64229 | 2.84362  | -1.46642 |
| C  | -1.18700 | 3.39292  | 0.97566  |
| C  | 0.22132  | 2.97215  | -1.53999 |
| C  | 3.98594  | 1.14598  | 0.56508  |
| C  | 3.65991  | 2.62029  | 0.23058  |
| C  | 3.96099  | 0.94872  | 2.09713  |
| C  | 5.38096  | 0.81098  | 0.00094  |
| C  | 3.57902  | -2.38639 | 0.75076  |
| C  | 1.81750  | -2.44891 | -1.05239 |
| H  | -0.83635 | -3.81102 | -0.53011 |
| H  | -1.79630 | -3.13417 | -1.87506 |
| H  | -2.58859 | -4.11065 | -0.62579 |
| H  | -4.88863 | -2.12300 | -1.25850 |
| H  | -3.60092 | -1.61815 | -2.36949 |
| H  | -4.67897 | -0.40002 | -1.64617 |
| H  | -4.87146 | 1.02428  | 0.07261  |

|   |          |          |          |
|---|----------|----------|----------|
| H | -3.91164 | 1.72409  | 1.40889  |
| H | -5.04486 | 0.40171  | 1.72725  |
| H | -2.53607 | -0.44512 | 3.80977  |
| H | -2.28930 | 1.15007  | 3.06243  |
| H | -0.89193 | 0.08047  | 3.35472  |
| H | -1.16263 | -3.12875 | 2.92449  |
| H | 0.19424  | -2.02028 | 2.59645  |
| H | -0.10249 | -3.41674 | 1.52806  |
| H | 1.02259  | -0.39240 | 1.71492  |
| H | 2.59411  | 0.60887  | -1.57009 |
| H | 1.49380  | -2.07392 | -2.03801 |
| H | 0.98386  | -2.31993 | -0.34419 |
| H | 2.02795  | -3.52867 | -1.16335 |
| H | 4.32386  | -2.91846 | -1.90178 |
| H | 5.14386  | -1.43779 | -1.36722 |
| H | 3.85448  | -1.34989 | -2.59878 |
| H | 2.83686  | -2.28042 | 1.55942  |
| H | 4.53524  | -1.96478 | 1.09934  |
| H | 3.74038  | -3.46607 | 0.58076  |
| H | 6.11068  | 1.52679  | 0.42169  |
| H | 5.42606  | 0.90439  | -1.09712 |
| H | 5.72119  | -0.19723 | 0.28484  |
| H | 2.68486  | 2.93058  | 0.63958  |
| H | 3.67576  | 2.81285  | -0.85647 |
| H | 4.43013  | 3.26613  | 0.68937  |
| H | 2.97280  | 1.18843  | 2.52068  |
| H | 4.70412  | 1.62510  | 2.55641  |
| H | 4.22373  | -0.07938 | 2.39279  |
| H | 0.04674  | 4.04680  | -1.71238 |
| H | 0.24904  | 2.45148  | -2.50947 |
| H | 1.18332  | 2.83494  | -1.02885 |
| H | -2.59344 | 3.93359  | -1.62583 |
| H | -3.56460 | 2.60105  | -0.91983 |
| H | -2.66840 | 2.33806  | -2.44396 |
| H | -0.31111 | 3.18937  | 1.60817  |
| H | -2.10020 | 3.20522  | 1.56125  |
| H | -1.18070 | 4.44644  | 0.65160  |
| C | -0.55136 | -0.35971 | -3.09950 |
| H | -1.43186 | 0.27379  | -3.26622 |
| H | 0.32817  | 0.06686  | -3.60324 |
| H | -0.74472 | -1.37623 | -3.47151 |
| H | -0.31300 | -0.44467 | -2.00559 |
| H | 1.03127  | 1.51731  | 1.13604  |

11''')<sub>tBu</sub>

SCF Energy = -975.877462273  
 Enthalpy 0K = -975.278704  
 Enthalpy 298K = -975.240015  
 Free Energy 298K = -975.344616  
 SCF(DCM) = -975.924470500  
 SCF(BP86-D3) = -0.11694904  
 Lowest Frequencies = 25.1664  
 36.7629 cm<sup>-1</sup>

|    |          |          |          |
|----|----------|----------|----------|
| Rh | -1.00276 | -0.02416 | -0.04636 |
| C  | -2.69017 | -1.58224 | -0.65586 |
| C  | -3.34115 | -0.46153 | -0.10041 |
| C  | -2.73394 | -0.22937 | 1.22697  |
| C  | -1.85064 | -1.36278 | 1.53772  |
| C  | -1.75140 | -2.14194 | 0.34970  |
| C  | -2.95347 | -2.19863 | -1.99902 |
| H  | -2.02821 | -2.56394 | -2.47356 |

H -3.43634 -1.48916 -2.68837  
 H -3.62564 -3.07126 -1.89479  
 C -4.50866 0.28320 -0.68424  
 H -5.45431 -0.22751 -0.42201  
 H -4.46186 0.33448 -1.78413  
 H -4.58305 1.31016 -0.29796  
 C -3.24461 0.73487 2.25750  
 H -3.63355 1.66203 1.80987  
 H -2.46762 0.99556 2.99199  
 H -4.08156 0.26909 2.81292  
 C -1.29429 -1.68269 2.89357  
 H -2.07096 -2.17907 3.50532  
 H -0.96917 -0.77700 3.42849  
 H -0.43060 -2.36060 2.83123  
 C -1.01115 -3.43989 0.19554  
 H -1.66999 -4.29043 0.45326  
 H -0.13531 -3.48732 0.86144  
 H -0.66854 -3.60077 -0.83913  
 B 0.85564 0.01541 1.09134  
 H 0.92979 0.85812 1.96400  
 H 1.02065 -1.11761 1.51470  
 P 2.46684 0.23490 -0.02238  
 H 2.61360 1.51557 -0.66006  
 C 2.44330 -0.90892 -1.55884  
 C 1.02836 -0.75119 -2.16031  
 H 0.86232 0.25261 -2.57756  
 H 0.22473 -0.98340 -1.40112  
 H 0.87483 -1.48272 -2.97527  
 C 3.46910 -0.48183 -2.63261  
 H 3.31933 -1.09212 -3.54167  
 H 4.50761 -0.63290 -2.30461  
 H 3.34939 0.57657 -2.92069  
 C 2.67935 -2.37047 -1.12364  
 H 1.97336 -2.68724 -0.33859  
 H 3.70422 -2.52351 -0.74921  
 H 2.54452 -3.03843 -1.99353  
 C 4.08535 0.19728 1.01923  
 C 5.35252 0.15162 0.14426  
 H 6.23686 0.27287 0.79604  
 H 5.38005 0.96481 -0.60067  
 H 5.46707 -0.81199 -0.37774  
 C 4.06019 1.51881 1.82558  
 H 3.15444 1.60558 2.44746  
 H 4.12944 2.40477 1.17069  
 H 4.93426 1.53879 2.50078  
 C 4.04672 -1.00434 1.98744  
 H 3.15522 -0.97954 2.63342  
 H 4.94079 -0.96739 2.63516  
 H 4.06304 -1.97050 1.45707  
 P -0.83523 2.27077 -0.43198  
 C -0.00821 2.81101 -2.02354  
 H -0.08014 3.90685 -2.12249  
 H -0.50995 2.33985 -2.88326  
 H 1.05440 2.52613 -2.02716  
 C -2.45802 3.17545 -0.61669  
 H -2.27076 4.23986 -0.83382  
 H -3.03929 3.10345 0.31472  
 H -3.04023 2.73417 -1.43912  
 C 0.01854 3.35333 0.82160  
 H 1.06841 3.04669 0.93120  
 H -0.47445 3.23351 1.79840

H -0.03133 4.40928 0.50956  
 TS(11''-11)<sub>tBu</sub>  
 SCF Energy = -975.870094237  
 Enthalpy 0K = -975.272141  
 Enthalpy 298K = -975.233597  
 Free Energy 298K = -975.338465  
 SCF(DCM) = -975.917383375  
 SCF(BP86-D3) = -0.11148692  
 Lowest Frequencies = -196.0516  
 16.4516 cm<sup>-1</sup>  
 Rh -1.19274 -0.07129 -0.13097  
 C -3.07586 -1.18950 -0.93488  
 C -3.56693 -0.21439 -0.03816  
 C -2.84015 -0.40353 1.22480  
 C -2.09129 -1.67662 1.14988  
 C -2.17450 -2.11626 -0.19710  
 C -3.46421 -1.36499 -2.37194  
 H -2.60362 -1.66034 -2.99410  
 H -3.89749 -0.44557 -2.79442  
 H -4.22027 -2.16732 -2.46950  
 C -4.66292 0.77865 -0.30236  
 H -5.64920 0.30463 -0.14161  
 H -4.64774 1.15195 -1.33916  
 H -4.61190 1.64593 0.37217  
 C -3.09315 0.35498 2.49329  
 H -3.38876 1.39760 2.29780  
 H -2.20700 0.36002 3.14715  
 H -3.91977 -0.11950 3.05672  
 C -1.46356 -2.39651 2.30501  
 H -2.19381 -3.09532 2.75435  
 H -1.13846 -1.69973 3.09276  
 H -0.58623 -2.98243 1.99060  
 C -1.59231 -3.37218 -0.77546  
 H -2.35178 -4.17616 -0.79149  
 H -0.73499 -3.72895 -0.18529  
 H -1.25270 -3.22367 -1.81363  
 B 0.80392 -0.69108 0.36245  
 H 0.87713 -1.11271 1.49750  
 H 0.73584 -1.59553 -0.47263  
 P 2.58396 0.10064 0.00274  
 H 2.65317 1.53449 -0.09668  
 C 3.31952 -0.38598 -1.70962  
 C 2.17188 -0.30190 -2.74275  
 H 1.76914 0.72059 -2.83779  
 H 1.34204 -0.98412 -2.50205  
 H 2.57186 -0.58667 -3.73276  
 C 4.43700 0.59339 -2.13196  
 H 4.78361 0.32300 -3.14578  
 H 5.31170 0.55993 -1.46654  
 H 4.07601 1.63543 -2.17532  
 C 3.85203 -1.83397 -1.65226  
 H 3.08422 -2.54404 -1.30143  
 H 4.73797 -1.92574 -1.00313  
 H 4.15599 -2.14606 -2.66747  
 C 3.77429 -0.15028 1.49181  
 C 5.20265 0.34932 1.19817  
 H 5.78955 0.31467 2.13391  
 H 5.21895 1.39162 0.83721  
 H 5.72531 -0.28631 0.46556  
 C 3.15708 0.69927 2.62895



|   |          |          |          |
|---|----------|----------|----------|
| H | 2.11295  | 0.41439  | 2.84005  |
| H | 3.19502  | 1.77937  | 2.40247  |
| H | 3.74108  | 0.53799  | 3.55291  |
| C | 3.80268  | -1.63642 | 1.91248  |
| H | 2.79517  | -2.02112 | 2.13613  |
| H | 4.41337  | -1.73268 | 2.82800  |
| H | 4.25742  | -2.28102 | 1.14399  |
| P | -0.76985 | 2.21297  | -0.17880 |
| C | 0.24414  | 2.90198  | -1.58957 |
| H | 0.28648  | 4.00158  | -1.51928 |
| H | -0.21926 | 2.61739  | -2.54705 |
| H | 1.26670  | 2.50043  | -1.55710 |
| C | -2.27701 | 3.30855  | -0.30661 |
| H | -1.96995 | 4.36649  | -0.35178 |
| H | -2.91881 | 3.16527  | 0.57564  |
| H | -2.85200 | 3.05798  | -1.21060 |
| C | 0.05258  | 2.95680  | 1.32010  |
| H | 1.03883  | 2.49720  | 1.47526  |
| H | -0.56953 | 2.74634  | 2.20399  |
| H | 0.16408  | 4.04763  | 1.20368  |

11<sub>tBu</sub>

SCF Energy = -975.891367404  
 Enthalpy 0K = -975.292879  
 Enthalpy 298K = -975.254147  
 Free Energy 298K = -975.359464  
 SCF(DCM) = -975.937370782  
 SCF(BP86-D3) = -0.11174809  
 Lowest Frequencies = 21.4642  
 29.4636 cm<sup>-1</sup>

|    |          |          |          |
|----|----------|----------|----------|
| C  | -2.07785 | -1.66683 | 1.05558  |
| C  | -2.03733 | -2.12623 | -0.30309 |
| C  | -2.93226 | -1.27177 | -1.10438 |
| C  | -3.51075 | -0.29708 | -0.24979 |
| C  | -2.91146 | -0.46576 | 1.07917  |
| Rh | -1.14926 | -0.05706 | -0.19347 |
| B  | 0.80475  | -0.60920 | -0.19087 |
| P  | 2.60492  | 0.17596  | -0.03324 |
| C  | 3.67636  | -0.12468 | -1.60285 |
| C  | 5.15455  | 0.24330  | -1.36947 |
| C  | -1.37645 | -3.37992 | -0.80051 |
| C  | -3.25674 | -1.49089 | -2.55430 |
| C  | -4.62273 | 0.64699  | -0.61304 |
| C  | -3.34943 | 0.24376  | 2.33043  |
| C  | -1.48373 | -2.35158 | 2.25427  |
| P  | -0.83514 | 2.23009  | 0.00577  |
| C  | -2.38419 | 3.27135  | -0.02700 |
| C  | -0.02315 | 2.91228  | 1.54385  |
| C  | 0.12492  | 3.05419  | -1.36654 |
| C  | 3.39455  | -0.37061 | 1.62659  |
| C  | 2.26962  | -0.30236 | 2.68685  |
| C  | 3.91897  | -1.81936 | 1.52045  |
| C  | 4.52873  | 0.59789  | 2.02845  |
| C  | 3.53630  | -1.59947 | -2.03836 |
| C  | 3.07832  | 0.79766  | -2.69096 |
| H  | -2.38281 | -1.84913 | -3.12047 |
| H  | -3.62074 | -0.56962 | -3.03490 |
| H  | -4.04934 | -2.25578 | -2.65910 |
| H  | -5.59720 | 0.12805  | -0.54399 |
| H  | -4.52822 | 1.02270  | -1.64492 |
| H  | -4.67362 | 1.51339  | 0.06277  |

|   |          |          |          |
|---|----------|----------|----------|
| H | -3.66664 | 1.27944  | 2.13177  |
| H | -2.54984 | 0.26793  | 3.08742  |
| H | -4.21523 | -0.27799 | 2.78066  |
| H | -2.21556 | -3.05503 | 2.69482  |
| H | -1.20549 | -1.63231 | 3.04034  |
| H | -0.58734 | -2.93236 | 1.98746  |
| H | -2.07322 | -4.23549 | -0.72919 |
| H | -0.48109 | -3.63172 | -0.21085 |
| H | -1.07256 | -3.29013 | -1.85554 |
| H | 1.02836  | -1.80035 | -0.08192 |
| H | 2.65783  | 1.60573  | 0.07314  |
| H | 3.20720  | 1.86593  | -2.44543 |
| H | 2.00732  | 0.59862  | -2.86628 |
| H | 3.60924  | 0.61386  | -3.64209 |
| H | 5.69735  | 0.14820  | -2.32734 |
| H | 5.64484  | -0.43018 | -0.64924 |
| H | 5.27927  | 1.28321  | -1.02299 |
| H | 2.48714  | -1.86828 | -2.24200 |
| H | 3.93130  | -2.30119 | -1.28748 |
| H | 4.11138  | -1.74952 | -2.96921 |
| H | 4.91211  | 0.29933  | 3.02065  |
| H | 4.17042  | 1.63796  | 2.11381  |
| H | 5.37795  | 0.58012  | 1.32939  |
| H | 1.42877  | -0.97300 | 2.44744  |
| H | 1.86984  | 0.71875  | 2.80454  |
| H | 2.68924  | -0.60782 | 3.66248  |
| H | 3.13467  | -2.52438 | 1.19942  |
| H | 4.26744  | -2.14159 | 2.51786  |
| H | 4.77513  | -1.90853 | 0.83234  |
| H | 0.20356  | 4.14026  | -1.19297 |
| H | -0.39875 | 2.87206  | -2.31799 |
| H | 1.13373  | 2.62406  | -1.44234 |
| H | -2.11715 | 4.34039  | 0.01337  |
| H | -3.01922 | 3.03256  | 0.83936  |
| H | -2.94928 | 3.07309  | -0.94982 |
| H | 1.01707  | 2.56086  | 1.60976  |
| H | -0.57017 | 2.54034  | 2.42401  |
| H | -0.03492 | 4.01499  | 1.54226  |
| H | 0.21587  | -0.20997 | -1.33849 |

TS(11-11')<sub>tBu</sub>

SCF Energy = -975.885463285  
 Enthalpy 0K = -975.288537  
 Enthalpy 298K = -975.250093  
 Free Energy 298K = -975.354129  
 SCF(DCM) = -975.931920910  
 SCF(BP86-D3) = -0.11181336  
 Lowest Frequencies = -372.7439  
 28.2325 cm<sup>-1</sup>

|    |          |          |          |
|----|----------|----------|----------|
| C  | -2.13586 | -1.46628 | 1.35751  |
| C  | -1.93081 | -2.15082 | 0.10354  |
| C  | -2.75718 | -1.49151 | -0.91288 |
| C  | -3.44911 | -0.41014 | -0.29310 |
| C  | -3.01974 | -0.34653 | 1.10469  |
| Rh | -1.09739 | -0.06080 | -0.12384 |
| B  | 0.77527  | -0.51210 | 0.27569  |
| P  | 2.60026  | 0.20110  | -0.05401 |
| C  | 3.41536  | -0.55184 | -1.62618 |
| C  | 4.92973  | -0.26736 | -1.67643 |
| C  | -1.20254 | -3.45336 | -0.08130 |
| C  | -2.94799 | -1.97652 | -2.32366 |

C -4.54313 0.40589 -0.92577  
 C -3.61259 0.54080 2.16616  
 C -1.62446 -1.90837 2.70100  
 P -0.86846 2.23092 -0.30552  
 C -2.44983 3.20970 -0.45978  
 C -0.04657 3.13971 1.10311  
 C 0.05833 2.86986 -1.79259  
 C 3.59787 0.06439 1.57505  
 C 2.62543 0.49825 2.69921  
 C 4.04336 -1.39560 1.80568  
 C 4.81188 1.01778 1.55348  
 C 3.13429 -2.06996 -1.65669  
 C 2.72099 0.13574 -2.82508  
 H -2.02936 -2.42746 -2.72962  
 H -3.25063 -1.16052 -2.99811  
 H -3.73916 -2.74876 -2.36143  
 H -5.49990 -0.14796 -0.88904  
 H -4.33695 0.62500 -1.98619  
 H -4.70664 1.36064 -0.40426  
 H -3.98015 1.49321 1.75277  
 H -2.88459 0.77197 2.95989  
 H -4.47710 0.04421 2.64550  
 H -2.32313 -2.63329 3.15913  
 H -1.52263 -1.06235 3.39851  
 H -0.64414 -2.40389 2.62003  
 H -1.87808 -4.30412 0.12495  
 H -0.34393 -3.54249 0.60307  
 H -0.83056 -3.57053 -1.11152  
 H 1.01582 -1.59496 0.78088  
 H 2.67518 1.60638 -0.33173  
 H 2.93781 1.21699 -2.86382  
 H 1.62716 -0.00774 -2.81603  
 H 3.10787 -0.31078 -3.75849  
 H 5.32080 -0.62672 -2.64556  
 H 5.48756 -0.79459 -0.88624  
 H 5.15625 0.81017 -1.61137  
 H 2.05307 -2.28567 -1.66188  
 H 3.58844 -2.60163 -0.80585  
 H 3.56610 -2.49145 -2.58168  
 H 5.31252 0.97303 2.53724  
 H 4.51085 2.06591 1.38523  
 H 5.55699 0.74362 0.79209  
 H 1.73105 -0.14528 2.75390  
 H 2.29524 1.54416 2.58223  
 H 3.15192 0.42707 3.66818  
 H 3.19244 -2.09662 1.80505  
 H 4.52994 -1.46356 2.79486  
 H 4.77736 -1.73232 1.05653  
 H 0.11046 3.97095 -1.77922  
 H -0.46347 2.53674 -2.70315  
 H 1.07758 2.45725 -1.81066  
 H -2.21593 4.28055 -0.57969  
 H -3.06424 3.07918 0.44387  
 H -3.01993 2.86284 -1.33410  
 H 0.99722 2.80529 1.19767  
 H -0.57396 2.89386 2.03758  
 H -0.06808 4.23026 0.94091  
 H -0.10267 -0.19360 -1.37883

11' <sub>tBu</sub>  
 SCF Energy = -975.886749414

Enthalpy 0K = -975.288295  
 Enthalpy 298K = -975.249548  
 Free Energy 298K = -975.354732  
 SCF(DCM) = -975.933375459  
 SCF(BP86-D3) = -0.11245979  
 Lowest Frequencies = 22.7981  
 24.0440 cm<sup>-1</sup>  
 C -1.70148 -2.01303 0.82499  
 C -2.41023 -1.88543 -0.44642  
 C -3.31182 -0.77178 -0.34957  
 C -3.13193 -0.17691 0.96472  
 C -2.16329 -0.95782 1.69959  
 Rh -1.05691 -0.05676 -0.14944  
 P -1.03642 2.16914 -0.73591  
 C -1.12687 3.38701 0.67224  
 C -2.35185 -2.87257 -1.58046  
 C -4.37698 -0.41973 -1.35335  
 C -3.98172 0.92050 1.54623  
 C -1.80203 -0.80005 3.15076  
 C -0.85704 -3.18629 1.24049  
 B 0.77973 -0.19197 0.54020  
 P 2.58452 0.11358 -0.24248  
 C 3.71942 1.03494 0.99974  
 C 4.24850 0.05625 2.06943  
 C 3.28916 -1.49536 -1.01739  
 C 3.11698 -2.66257 -0.02132  
 C 2.43842 -1.75042 -2.28521  
 C 4.76868 -1.32368 -1.41394  
 C 4.88000 1.73691 0.26415  
 C 2.81146 2.09651 1.66633  
 C 0.38054 2.83882 -1.74105  
 C -2.47524 2.68979 -1.80178  
 H -1.36716 -3.35964 -1.65097  
 H -2.56371 -2.39450 -2.54926  
 H -3.10438 -3.66938 -1.43125  
 H -5.27904 -1.03982 -1.19256  
 H -4.04300 -0.59489 -2.38846  
 H -4.69559 0.63121 -1.27532  
 H -4.29730 1.65383 0.78691  
 H -3.46441 1.46083 2.35495  
 H -4.90507 0.49438 1.98098  
 H -2.43649 -1.44647 3.78550  
 H -1.93877 0.23694 3.49532  
 H -0.75377 -1.08259 3.34047  
 H -1.49252 -3.96987 1.69388  
 H -0.10263 -2.90374 1.99153  
 H -0.33872 -3.64323 0.38283  
 H 1.00117 -0.72665 1.61318  
 H 2.59181 0.99036 -1.37358  
 H 2.57147 -0.95584 -3.03911  
 H 1.36333 -1.83626 -2.05744  
 H 2.76985 -2.70006 -2.74213  
 H 5.09598 -2.23494 -1.94667  
 H 5.42927 -1.20267 -0.54081  
 H 4.92299 -0.47120 -2.09655  
 H 2.06109 -2.81155 0.25743  
 H 3.70096 -2.52061 0.90179  
 H 3.47339 -3.59182 -0.50016  
 H 5.46678 2.31868 0.99765  
 H 4.51635 2.44348 -0.50140  
 H 5.56759 1.02746 -0.21974

H 1.96317 1.63858 2.20356  
H 2.41598 2.82250 0.93469  
H 3.40584 2.66693 2.40279  
H 3.43288 -0.47622 2.58631  
H 4.80653 0.62938 2.83090  
H 4.94221 -0.68820 1.64678  
H 0.16770 3.87704 -2.04343  
H 0.51928 2.21626 -2.63808  
H 1.30480 2.82593 -1.14556  
H -2.41306 3.76657 -2.03141  
H -3.42077 2.48748 -1.27778  
H -2.46069 2.11217 -2.73869  
H -0.24602 3.25474 1.31882  
H -2.02891 3.18165 1.26832  
H -1.16458 4.42412 0.29948  
H -0.30930 -0.23763 -1.52337

TS(11''-9')<sub>1</sub><sub>tBu</sub>

SCF Energy = -975.846610588  
Enthalpy 0K = -975.246999  
Enthalpy 298K = -975.209592  
Free Energy 298K = -975.309851  
SCF(DCM) = -975.894832179  
SCF(BP86-D3) = -0.12056329  
Lowest Frequencies = -94.5339  
22.4288 cm<sup>-1</sup>

C -1.82204 -1.59427 -1.21709  
C -2.58383 -0.38140 -0.98308  
C -2.92034 -0.34175 0.46735  
C -2.26622 -1.42405 1.09564  
C -1.60890 -2.21469 0.05319  
Rh -0.66510 0.08812 -0.09168  
B 0.78746 0.23631 -1.74478  
P 2.06971 -0.10270 -0.27975  
C 3.61363 1.12643 -0.14092  
C 3.78889 1.61069 1.30917  
C -3.32192 0.34579 -2.07422  
C -3.99069 0.51131 1.08638  
C -2.35957 -1.82673 2.54157  
C -1.13974 -3.62508 0.26902  
C -1.55793 -2.20218 -2.56512  
P -0.92344 2.37418 0.27870  
C -2.21753 3.29297 -0.70627  
C -1.41026 2.72173 2.05134  
C 0.44238 3.62561 0.09606  
C 2.44972 -1.90556 0.40655  
C 2.05811 -2.87533 -0.72669  
C 3.91601 -2.18958 0.79475  
C 1.59981 -2.08768 1.68055  
C 4.88573 0.39005 -0.63450  
C 3.40137 2.29486 -1.12312  
H -4.01427 1.54023 0.69787  
H -3.90345 0.55657 2.18320  
H -4.97961 0.06912 0.86003  
H -3.10744 -2.63024 2.67969  
H -2.66004 -0.98413 3.18351  
H -1.40091 -2.21301 2.92516  
H -0.54604 -3.75128 1.18666  
H -0.56450 -4.01772 -0.58057  
H -2.03444 -4.26785 0.38058  
H -2.40063 -2.86090 -2.84895

H -0.64231 -2.81341 -2.58108  
H -1.45411 -1.43442 -3.34558  
H -4.16210 -0.28153 -2.42926  
H -2.67312 0.54811 -2.94035  
H -3.75225 1.29760 -1.73585  
H 0.66859 -0.67411 -2.52637  
H 1.17870 0.36479 0.86140  
H 2.49106 2.87121 -0.94127  
H 3.37730 1.94313 -2.16635  
H 4.25928 2.98356 -1.01669  
H 4.67825 2.26339 1.37430  
H 3.94225 0.77335 2.01022  
H 2.92285 2.19442 1.66415  
H 4.70966 -0.19605 -1.55322  
H 5.33827 -0.25734 0.12497  
H 5.63359 1.16122 -0.89094  
H 1.65882 -3.14045 2.01101  
H 0.54059 -1.82675 1.52210  
H 1.98098 -1.45830 2.50333  
H 2.75184 -2.78749 -1.57918  
H 1.04365 -2.68999 -1.10514  
H 2.10960 -3.91451 -0.35467  
H 4.59388 -2.19265 -0.06967  
H 3.94468 -3.20461 1.23104  
H 4.30219 -1.50018 1.56232  
H 0.06763 4.60266 0.44229  
H 0.72924 3.70648 -0.96185  
H 1.31458 3.34715 0.70294  
H -2.20833 4.35416 -0.40861  
H -3.22480 2.89161 -0.53459  
H -1.97814 3.21337 -1.77778  
H -0.57396 2.42833 2.70543  
H -2.29452 2.13486 2.33425  
H -1.62181 3.79503 2.19155  
H 1.01694 1.33038 -2.20840

INT(11''-9')<sub>tBu</sub>

SCF Energy = -975.878740512  
Enthalpy 0K = -975.278097  
Enthalpy 298K = -975.239799  
Free Energy 298K = -975.341487  
SCF(DCM) = -975.925785814  
SCF(BP86-D3) = -0.12392235  
Lowest Frequencies = 28.3665  
44.8960 cm<sup>-1</sup>

C -1.27055 -2.15169 -0.69568  
C -2.42390 -1.37424 -0.35533  
C -2.36296 -1.04287 1.07227  
C -1.14563 -1.60844 1.59507  
C -0.48274 -2.31034 0.51582  
Rh -0.59851 0.03194 0.11568  
B 0.74494 1.19765 -1.60474  
P 1.81212 0.41595 -0.28470  
C 2.65758 1.43774 1.13615  
C 1.89185 2.76022 1.31901  
C -3.60853 -1.21231 -1.26606  
C -3.50005 -0.57342 1.94087  
C -0.76665 -1.67969 3.04963  
C 0.59074 -3.33261 0.76045  
C -1.09079 -2.86705 -2.01006  
P -1.70456 2.00391 -0.60957

C -2.19030 2.15052 -2.40460  
 C -3.38413 2.19568 0.19726  
 C -1.08676 3.70685 -0.15816  
 C 3.03781 -0.87187 -1.08774  
 C 2.24980 -1.77357 -2.05481  
 C 4.05040 -0.07057 -1.94792  
 C 3.78442 -1.72438 -0.04222  
 C 2.59034 0.61704 2.44330  
 C 4.12611 1.79105 0.80606  
 H -4.32541 -0.13679 1.36282  
 H -3.17958 0.16201 2.69573  
 H -3.91317 -1.44062 2.48888  
 H -1.17901 -2.59742 3.50964  
 H -1.16016 -0.82018 3.61328  
 H 0.32504 -1.70313 3.18924  
 H 1.29111 -3.01465 1.54679  
 H 1.16537 -3.59807 -0.13679  
 H 0.10339 -4.25919 1.12076  
 H -1.99008 -3.46553 -2.24202  
 H -0.23908 -3.56235 -1.98620  
 H -0.93168 -2.17260 -2.85166  
 H -4.22981 -2.12718 -1.22155  
 H -3.30298 -1.08338 -2.31608  
 H -4.26279 -0.37358 -0.98666  
 H 0.60050 0.57243 -2.62236  
 H -0.26863 0.99486 1.29675  
 H 4.21469 2.37994 -0.12108  
 H 4.77987 0.90940 0.73217  
 H 4.51995 2.41228 1.63082  
 H 2.35924 3.32547 2.14556  
 H 0.83716 2.59354 1.58948  
 H 1.93520 3.38698 0.41428  
 H 3.13257 -0.33948 2.36910  
 H 1.54663 0.40494 2.72796  
 H 3.05395 1.19826 3.26104  
 H 4.45121 -2.43114 -0.56902  
 H 3.10005 -2.31567 0.58300  
 H 4.41931 -1.11869 0.62268  
 H 1.82556 -1.20067 -2.89289  
 H 1.43140 -2.30450 -1.55749  
 H 2.94156 -2.52506 -2.47683  
 H 3.53979 0.55318 -2.69902  
 H 4.68350 -0.79800 -2.48933  
 H 4.72074 0.56861 -1.35926  
 H -1.80318 4.43783 -0.56700  
 H -0.08824 3.91408 -0.55832  
 H -1.07137 3.80139 0.93842  
 H -2.84231 3.02981 -2.53467  
 H -2.74161 1.24612 -2.70379  
 H -1.29593 2.24810 -3.03359  
 H -3.27833 2.19475 1.29163  
 H -4.06485 1.38988 -0.10291  
 H -3.81759 3.15786 -0.12122  
 H 0.60665 2.38625 -1.62831

TS (11''-6)<sub>tBu</sub>  
 SCF Energy = -975.873494954  
 Enthalpy 0K = -975.273296  
 Enthalpy 298K = -975.235756  
 Free Energy 298K = -975.335297  
 SCF (DCM) = -975.920298264

SCF(BP86-D3) = -0.12283801  
 Lowest Frequencies = -43.4147  
 30.2826 cm-1  
 C 1.23613 -1.92431 1.08628  
 C 2.41492 -1.36932 0.49754  
 C 2.25132 -1.33530 -0.95744  
 C 0.96317 -1.90569 -1.26012  
 C 0.33171 -2.26029 -0.00095  
 Rh 0.60902 0.05800 -0.19928  
 B -0.87271 2.03033 0.56572  
 P -1.80132 0.49628 0.07847  
 C -2.83489 0.60963 -1.56364  
 C -2.04480 1.43370 -2.59895  
 C 3.69134 -1.15906 1.26415  
 C 3.33013 -1.12655 -1.98676  
 C 0.51721 -2.32565 -2.63456  
 C -0.86250 -3.16377 0.11393  
 C 1.13858 -2.34996 2.52747  
 P 1.85051 2.05358 0.24647  
 C 2.21320 2.43073 2.03638  
 C 3.58405 1.88975 -0.44621  
 C 1.49738 3.74458 -0.47445  
 C -2.85537 -0.10224 1.61465  
 C -1.86408 -0.49823 2.72281  
 C -3.67889 1.11373 2.11093  
 C -3.80625 -1.27551 1.30519  
 C -3.09400 -0.80081 -2.12925  
 C -4.17462 1.33031 -1.28486  
 H 4.19387 -0.57325 -1.59386  
 H 2.95628 -0.59112 -2.87379  
 H 3.70300 -2.10892 -2.33286  
 H 1.04909 -3.24864 -2.93340  
 H 0.73515 -1.55876 -3.39361  
 H -0.55904 -2.54738 -2.67235  
 H -1.62052 -2.95971 -0.65634  
 H -1.34072 -3.10704 1.10212  
 H -0.52659 -4.20913 -0.02604  
 H 1.93168 -3.08626 2.75834  
 H 0.17848 -2.83574 2.75391  
 H 1.26340 -1.50900 3.22902  
 H 3.99850 -2.12306 1.71142  
 H 3.58183 -0.45114 2.10207  
 H 4.52240 -0.82542 0.62642  
 H -0.71728 2.26493 1.73384  
 H 0.38398 0.79783 -1.54899  
 H -4.02437 2.33665 -0.86140  
 H -4.83594 0.75918 -0.61576  
 H -4.71142 1.44799 -2.24395  
 H -2.65005 1.50343 -3.52109  
 H -1.08756 0.95598 -2.86537  
 H -1.84205 2.45859 -2.25073  
 H -3.66187 -1.44005 -1.43626  
 H -2.14665 -1.30339 -2.37917  
 H -3.68212 -0.71792 -3.06119  
 H -4.31472 -1.56952 2.24161  
 H -3.28243 -2.16343 0.92205  
 H -4.59544 -1.00220 0.58747  
 H -1.13862 0.30446 2.93277  
 H -1.30547 -1.40734 2.46530  
 H -2.42782 -0.69543 3.65281  
 H -3.02797 1.94669 2.41762

H -4.26523 0.79614 2.99338  
H -4.39059 1.48838 1.36167  
H 2.44032 4.31423 -0.48691  
H 0.74988 4.28068 0.12270  
H 1.12342 3.63362 -1.50364  
H 3.00298 3.19668 2.10242  
H 2.55061 1.51578 2.54687  
H 1.30046 2.79427 2.52840  
H 3.52924 1.76618 -1.53792  
H 4.10906 1.03500 -0.00630  
H 4.14741 2.80855 -0.21602  
H -0.79919 2.88474 -0.26333

INT(11''-6)2<sub>tBu</sub>

SCF Energy = -975.874394716  
Enthalpy 0K = -975.273643  
Enthalpy 298K = -975.235387  
Free Energy 298K = -975.337323  
SCF(DCM) = -975.921239875  
SCF(BP86-D3) = -0.12393654  
Lowest Frequencies = 24.2308  
45.9601 cm<sup>-1</sup>

C 0.95930 -1.66211 1.46606  
C 2.23773 -1.19136 1.06896  
C 2.40905 -1.45794 -0.36855  
C 1.22696 -2.14166 -0.83200  
C 0.30970 -2.23448 0.27718  
Rh 0.62548 -0.01791 -0.28732  
B -0.93408 2.03950 -0.58197  
P -1.79262 0.46538 -0.09657  
C -2.98669 -0.11525 -1.53341  
C -2.11459 -0.59890 -2.70674  
C 3.30357 -0.73496 2.02671  
C 3.70609 -1.45724 -1.13364  
C 1.09354 -2.82089 -2.16789  
C -0.90501 -3.11899 0.30207  
C 0.51441 -1.82820 2.89240  
P 1.83324 2.04477 -0.30215  
C 1.91199 2.96019 1.32006  
C 3.65904 1.78884 -0.62466  
C 1.57359 3.39200 -1.57286  
C -2.64377 0.64398 1.64825  
C -1.57651 1.22946 2.59544  
C -3.81440 1.64571 1.51374  
C -3.17590 -0.68185 2.22790  
C -3.93575 -1.24594 -1.08837  
C -3.82131 1.10301 -1.99934  
H 4.48929 -0.85958 -0.64876  
H 3.58363 -1.09401 -2.16636  
H 4.08542 -2.49433 -1.19951  
H 1.56958 -3.81871 -2.12851  
H 1.58478 -2.24960 -2.97001  
H 0.04287 -2.97277 -2.45656  
H -1.36439 -3.21672 -0.69312  
H -1.67187 -2.76748 1.00617  
H -0.60310 -4.13464 0.62213  
H 0.93577 -2.76351 3.30904  
H -0.57779 -1.89627 2.99392  
H 0.86313 -1.00417 3.53496  
H 3.69469 -1.60735 2.58310  
H 2.91678 -0.02613 2.77694

H 4.16393 -0.27116 1.52291  
H -0.72722 2.88583 0.24304  
H 0.45542 0.27596 -1.80476  
H -3.18502 1.91305 -2.38833  
H -4.45697 1.51514 -1.20103  
H -4.49092 0.77618 -2.81654  
H -2.77633 -0.88108 -3.54584  
H -1.50945 -1.47736 -2.43489  
H -1.43325 0.18887 -3.06651  
H -4.66178 -0.90800 -0.33188  
H -3.39973 -2.12362 -0.69485  
H -4.52067 -1.57909 -1.96493  
H -3.63482 -0.47605 3.21207  
H -2.37595 -1.41878 2.39293  
H -3.94880 -1.14640 1.59919  
H -1.28345 2.24821 2.30041  
H -0.67060 0.60366 2.62761  
H -1.99759 1.28293 3.61574  
H -3.49165 2.60195 1.07186  
H -4.21613 1.85519 2.52258  
H -4.64538 1.24189 0.91376  
H 2.45559 4.05255 -1.56073  
H 0.67002 3.97575 -1.36245  
H 1.47692 2.92927 -2.56702  
H 2.60283 3.81459 1.23169  
H 2.28028 2.27689 2.10086  
H 0.91385 3.32159 1.60198  
H 3.80369 1.33848 -1.61722  
H 4.10748 1.14239 0.13942  
H 4.16117 2.76966 -0.59797  
H -0.88598 2.29244 -1.75243

TS(11''-6)2'<sub>tBu</sub>

SCF Energy = -975.871852295  
Enthalpy 0K = -975.271438  
Enthalpy 298K = -975.234002  
Free Energy 298K = -975.333110  
SCF(DCM) = -975.918774957  
SCF(BP86-D3) = -0.12309083  
Lowest Frequencies = -76.6395  
40.9283 cm<sup>-1</sup>

C 1.00111 -1.40137 1.68984  
C 2.27395 -1.02213 1.17777  
C 2.39836 -1.53062 -0.19549  
C 1.21005 -2.30090 -0.48347  
C 0.33640 -2.20528 0.66072  
Rh 0.64370 -0.07782 -0.24508  
B -0.95946 1.50592 -1.50425  
P -1.79735 0.43501 -0.21835  
C -3.09633 -0.66512 -1.18994  
C -2.32032 -1.57251 -2.16324  
C 3.37600 -0.47043 2.03822  
C 3.65383 -1.59253 -1.02381  
C 1.04974 -3.20001 -1.67864  
C -0.85157 -3.07936 0.94078  
C 0.59262 -1.28100 3.13318  
P 1.82284 1.97250 -0.57613  
C 1.37031 3.56912 0.28633  
C 3.64008 1.96880 -0.12880  
C 1.99942 2.46628 -2.36753  
C -2.55319 1.32527 1.32790

|   |          |          |          |    |          |          |          |
|---|----------|----------|----------|----|----------|----------|----------|
| C | -1.51428 | 2.35766  | 1.80151  | C  | 2.30842  | -1.13882 | -1.31940 |
| C | -3.86304 | 2.05547  | 0.95573  | C  | 1.74046  | -2.08407 | -0.37143 |
| C | -2.81446 | 0.31182  | 2.46068  | C  | 1.99575  | -1.58932 | 0.95878  |
| C | -3.99369 | -1.51773 | -0.27062 | C  | 2.70462  | -0.34321 | 0.84134  |
| C | -3.98721 | 0.29016  | -2.02363 | Rh | 0.69207  | 0.06447  | -0.29218 |
| H | 4.42425  | -0.88940 | -0.67545 | B  | -0.93980 | -0.68376 | -1.90055 |
| H | 3.45748  | -1.38861 | -2.08837 | P  | -1.85156 | -0.31058 | -0.25685 |
| H | 4.09449  | -2.60506 | -0.96107 | C  | -2.56091 | -1.78096 | 0.80610  |
| H | 1.60192  | -4.14393 | -1.51173 | C  | -3.45017 | -1.27107 | 1.96092  |
| H | 1.45150  | -2.73997 | -2.59461 | C  | 2.42269  | -1.36997 | -2.79915 |
| H | -0.00007 | -3.46562 | -1.86830 | C  | 1.27330  | -3.45855 | -0.75501 |
| H | -1.33666 | -3.44527 | 0.02542  | C  | 1.83353  | -2.33030 | 2.25585  |
| H | -1.60543 | -2.57178 | 1.56061  | C  | 3.41279  | 0.30102  | 2.00480  |
| H | -0.50952 | -3.96893 | 1.50361  | C  | 3.90135  | 0.91167  | -1.17956 |
| H | 1.20722  | -1.95673 | 3.75873  | P  | 0.56965  | 2.29705  | 0.46022  |
| H | -0.45744 | -1.56641 | 3.29083  | C  | -0.04942 | 2.43443  | 2.21546  |
| H | 0.73126  | -0.26083 | 3.52568  | C  | 2.18891  | 3.22006  | 0.58997  |
| H | 3.67772  | -1.25155 | 2.76160  | C  | -0.35908 | 3.65201  | -0.42908 |
| H | 3.05444  | 0.40123  | 2.63080  | C  | -3.26103 | 1.01145  | -0.59853 |
| H | 4.27254  | -0.19902 | 1.46555  | C  | -2.86961 | 1.84948  | -1.84095 |
| H | -0.64897 | 2.62719  | -1.22532 | C  | -4.56553 | 0.26876  | -0.98191 |
| H | 0.46260  | 0.05145  | -1.80009 | C  | -3.52909 | 1.91584  | 0.62233  |
| H | -3.39660 | 0.87501  | -2.74521 | C  | -3.32885 | -2.76887 | -0.10288 |
| H | -4.56769 | 0.98744  | -1.40294 | C  | -1.36793 | -2.51059 | 1.43685  |
| H | -4.70995 | -0.32144 | -2.59516 | H  | 0.40306  | -3.42913 | -1.43311 |
| H | -3.04689 | -2.12035 | -2.79062 | H  | 1.01473  | -4.07015 | 0.12163  |
| H | -1.70432 | -2.31255 | -1.63406 | H  | 2.08183  | -3.98275 | -1.29637 |
| H | -1.66459 | -0.99756 | -2.83618 | H  | 2.82050  | -2.70604 | 2.58848  |
| H | -4.64734 | -0.90137 | 0.36681  | H  | 1.16635  | -3.19811 | 2.16637  |
| H | -3.42487 | -2.20514 | 0.37299  | H  | 1.44936  | -1.68334 | 3.06077  |
| H | -4.65763 | -2.13424 | -0.90367 | H  | 2.72658  | 0.67517  | 2.78226  |
| H | -3.22864 | 0.84886  | 3.33348  | H  | 4.06834  | 1.12585  | 1.69079  |
| H | -1.88269 | -0.17515 | 2.78506  | H  | 4.06030  | -0.45003 | 2.49371  |
| H | -3.53958 | -0.46633 | 2.17992  | H  | 4.83257  | 0.37977  | -1.45025 |
| H | -1.39568 | 3.17454  | 1.07382  | H  | 4.17887  | 1.71301  | -0.48196 |
| H | -0.52791 | 1.89344  | 1.97291  | H  | 3.51450  | 1.37669  | -2.10036 |
| H | -1.85857 | 2.80108  | 2.75339  | H  | 3.29136  | -2.02356 | -3.00472 |
| H | -3.72682 | 2.75322  | 0.11371  | H  | 2.57529  | -0.42972 | -3.34996 |
| H | -4.19581 | 2.64381  | 1.83076  | H  | 1.52745  | -1.86536 | -3.20398 |
| H | -4.67926 | 1.35871  | 0.70881  | H  | -1.31602 | -0.06746 | -2.86967 |
| H | 2.60662  | 3.38321  | -2.44015 | H  | 0.11704  | 0.34476  | -1.82465 |
| H | 1.01844  | 2.63382  | -2.82995 | H  | -0.79099 | -1.83933 | 2.09089  |
| H | 2.51130  | 1.64951  | -2.90052 | H  | -0.69944 | -2.92527 | 0.67171  |
| H | 2.12922  | 4.32785  | 0.03409  | H  | -1.74421 | -3.35106 | 2.04906  |
| H | 1.36844  | 3.40727  | 1.37483  | H  | -3.74741 | -2.13792 | 2.57898  |
| H | 0.38245  | 3.92888  | -0.02688 | H  | -4.37741 | -0.78686 | 1.62354  |
| H | 4.16214  | 1.12759  | -0.60418 | H  | -2.90603 | -0.57151 | 2.61792  |
| H | 3.78057  | 1.92851  | 0.95925  | H  | -2.69440 | -3.13578 | -0.92586 |
| H | 4.07585  | 2.90984  | -0.50233 | H  | -4.24074 | -2.33717 | -0.53858 |
| H | -1.05600 | 1.20095  | -2.66386 | H  | -3.63515 | -3.64178 | 0.50348  |
|   |          |          |          | H  | -4.35086 | 2.61547  | 0.38378  |
|   |          |          |          | H  | -2.65299 | 2.52017  | 0.89947  |
|   |          |          |          | H  | -3.83313 | 1.34352  | 1.51134  |
|   |          |          |          | H  | -3.05211 | 1.28769  | -2.76902 |
|   |          |          |          | H  | -1.81866 | 2.16477  | -1.85829 |
|   |          |          |          | H  | -3.50073 | 2.75659  | -1.86936 |
|   |          |          |          | H  | -4.40742 | -0.43056 | -1.81856 |
|   |          |          |          | H  | -5.29443 | 1.02832  | -1.32095 |
|   |          |          |          | H  | -5.03250 | -0.27153 | -0.14588 |
|   |          |          |          | H  | -0.09011 | 4.61353  | 0.03788  |
|   |          |          |          | H  | -1.44429 | 3.52119  | -0.36767 |

6<sub>tBu</sub>  
 SCF Energy = -975.873406916  
 Enthalpy 0K = -975.271860  
 Enthalpy 298K = -975.234240  
 Free Energy 298K = -975.334151  
 SCF(DCM) = -975.921616869  
 SCF(BP86-D3) = -0.12233296  
 Lowest Frequencies = 28.7385  
 43.6464 cm<sup>-1</sup>  
 C 2.92583 -0.06674 -0.58210

H -0.05621 3.67024 -1.48761  
H -0.06079 3.48693 2.54429  
H 0.61887 1.85682 2.87338  
H -1.05984 2.00811 2.28924  
H 2.61801 3.35490 -0.41328  
H 2.90565 2.69430 1.23104  
H 1.98641 4.21182 1.02610  
H -0.56291 -1.80821 -2.10050

6' <sub>tBu</sub>

SCF Energy = -975.880531208  
Enthalpy 0K = -975.278854  
Enthalpy 298K = -975.241097  
Free Energy 298K = -975.341493  
SCF(DCM) = -975.928825744  
SCF(BP86-D3) = -0.12343504  
Lowest Frequencies = 20.2555  
55.6507 cm<sup>-1</sup>

C 0.70073 -1.61052 1.52645  
C 1.93303 -0.87982 1.45194  
C 2.58399 -1.21797 0.17583  
C 1.73114 -2.14333 -0.51786  
C 0.57695 -2.40862 0.31390  
Rh 0.58797 -0.12728 -0.21177  
B -0.87095 0.84639 -2.00476  
P -1.78566 0.42377 -0.36336  
C -3.09005 -0.95817 -0.80273  
C -2.41308 -1.97165 -1.75798  
C 2.56396 -0.18639 2.62914  
C 4.01437 -0.93783 -0.19200  
C 2.03848 -2.83006 -1.81912  
C -0.31371 -3.61215 0.18079  
C -0.13423 -1.77729 2.76451  
P 1.71425 2.00290 -0.52532  
C 0.98282 3.70464 -0.83269  
C 2.98751 2.54170 0.73326  
C 2.72435 1.82849 -2.08607  
C -2.51327 1.68859 0.92305  
C -1.66464 2.96591 0.87290  
C -3.98171 2.06198 0.62989  
C -2.38838 1.07229 2.33327  
C -3.64396 -1.66321 0.45210  
C -4.25987 -0.32366 -1.60181  
H 4.36024 0.05977 0.11640  
H 4.18708 -1.03988 -1.27463  
H 4.67177 -1.67288 0.30955  
H 2.55307 -3.79116 -1.63374  
H 2.69473 -2.22148 -2.45987  
H 1.12240 -3.04899 -2.38908  
H -0.36821 -3.98743 -0.85120  
H -1.33744 -3.43829 0.54018  
H 0.11591 -4.42354 0.79984  
H 0.24497 -2.63880 3.34754  
H -1.19105 -1.97607 2.53424  
H -0.08790 -0.89443 3.41922  
H 2.82019 -0.93891 3.39791  
H 1.88413 0.54112 3.09989  
H 3.49419 0.33209 2.36343  
H -0.55541 1.98182 -2.22751  
H 0.32742 0.11692 -1.87402  
H -3.89540 0.27776 -2.45077

H -4.92885 0.29639 -0.99110  
H -4.86900 -1.14730 -2.01824  
H -2.99261 -2.91209 -1.75402  
H -1.37714 -2.19912 -1.47849  
H -2.39965 -1.59292 -2.79030  
H -4.23242 -0.98311 1.08905  
H -2.84969 -2.10569 1.07485  
H -4.32203 -2.47948 0.14354  
H -2.77181 1.79481 3.07694  
H -1.33465 0.85984 2.57664  
H -2.96634 0.14237 2.44731  
H -1.72681 3.46551 -0.10567  
H -0.61093 2.74555 1.10368  
H -2.03530 3.67170 1.63856  
H -4.12218 2.44463 -0.39355  
H -4.27796 2.86491 1.32970  
H -4.67398 1.22325 0.79605  
H 3.37525 2.70804 -2.21916  
H 2.03107 1.75412 -2.93806  
H 3.33989 0.91902 -2.04948  
H 1.77614 4.30408 -1.30907  
H 0.70189 4.17817 0.11770  
H 0.11325 3.66232 -1.49904  
H 3.78545 1.79848 0.85471  
H 2.50129 2.70971 1.70607  
H 3.43886 3.48680 0.39070  
H -1.25154 0.19027 -2.94371

TS(11''-6) <sub>3tBu</sub>

SCF Energy = -975.837106474  
Enthalpy 0K = -975.241596  
Enthalpy 298K = -975.203569  
Free Energy 298K = -975.305793  
SCF(DCM) = -975.883450862  
SCF(BP86-D3) = -0.11466235  
Lowest Frequencies = -829.5529  
24.5673 cm<sup>-1</sup>

C -2.21753 -1.42854 0.93639  
C -1.77986 -2.10290 -0.26923  
C -2.36435 -1.39457 -1.39433  
C -3.23801 -0.34871 -0.89211  
C -3.14007 -0.36474 0.53824  
Rh -0.97178 0.00925 -0.26439  
B 0.84770 -0.65883 -1.06813  
P 2.31674 0.07029 -0.01169  
C 3.81804 0.63200 -1.18453  
C 5.09152 0.98845 -0.40050  
C -1.07957 -3.43050 -0.35215  
C -2.21657 -1.78977 -2.83445  
C -4.14252 0.50314 -1.73799  
C -4.00274 0.39420 1.50829  
C -2.01856 -1.90119 2.34700  
P -0.82927 2.23274 0.53379  
C -2.33405 3.25981 0.12893  
C -0.64835 2.47308 2.37282  
C 0.51553 3.32168 -0.13515  
C 2.90177 -1.19548 1.33388  
C 1.64907 -1.81218 1.98805  
C 3.77416 -2.32666 0.75168  
C 3.67765 -0.41012 2.41708  
C 4.08311 -0.49716 -2.20208

|                                |          |          |          |    |          |          |          |
|--------------------------------|----------|----------|----------|----|----------|----------|----------|
| C                              | 3.31282  | 1.87899  | -1.93890 | Rh | 1.12131  | -0.08842 | 0.00072  |
| H                              | -1.21984 | -2.21064 | -3.03891 | B  | -1.04394 | -0.51132 | -0.03225 |
| H                              | -2.37972 | -0.93781 | -3.51245 | P  | -2.73526 | 0.41821  | -0.37012 |
| H                              | -2.96242 | -2.56559 | -3.09009 | C  | -3.40088 | 0.83655  | 1.43255  |
| H                              | -5.04354 | -0.06338 | -2.03802 | C  | -4.90989 | 1.14500  | 1.34850  |
| H                              | -3.64257 | 0.83292  | -2.66305 | C  | 1.22019  | -3.40732 | -0.68582 |
| H                              | -4.48387 | 1.40150  | -1.20170 | C  | 1.13103  | -2.49292 | 2.37998  |
| H                              | -4.55938 | 1.20957  | 1.02268  | C  | 3.09845  | 0.01181  | 2.74362  |
| H                              | -3.43094 | 0.81375  | 2.35197  | C  | 4.53243  | 0.53647  | -0.09520 |
| H                              | -4.75196 | -0.29193 | 1.94515  | C  | 3.25752  | -1.46488 | -2.23975 |
| H                              | -2.83840 | -2.58653 | 2.63655  | P  | 1.19059  | 2.15212  | -0.69998 |
| H                              | -2.02324 | -1.06430 | 3.06284  | C  | 2.24640  | 3.29286  | 0.32360  |
| H                              | -1.07250 | -2.44839 | 2.46855  | C  | 1.88465  | 2.31877  | -2.41857 |
| H                              | -1.82844 | -4.23493 | -0.47567 | C  | -0.39631 | 3.09912  | -0.81090 |
| H                              | -0.50928 | -3.65357 | 0.56191  | C  | -3.79515 | -0.97556 | -1.22080 |
| H                              | -0.39114 | -3.48454 | -1.20936 | C  | -2.92270 | -1.45580 | -2.40487 |
| H                              | 0.90097  | -1.59645 | -1.82727 | C  | -4.17233 | -2.17661 | -0.33513 |
| H                              | 0.79958  | 0.53203  | 0.58601  | C  | -5.06649 | -0.31329 | -1.80098 |
| H                              | 3.19893  | 2.74967  | -1.27307 | C  | -3.14928 | -0.28090 | 2.46692  |
| H                              | 2.35003  | 1.69735  | -2.44810 | C  | -2.65985 | 2.11518  | 1.87658  |
| H                              | 4.04960  | 2.15242  | -2.71630 | H  | 0.23654  | -3.01470 | 2.00876  |
| H                              | 5.83765  | 1.40669  | -1.10183 | H  | 0.82053  | -1.78974 | 3.16790  |
| H                              | 5.55587  | 0.11030  | 0.07527  | H  | 1.78874  | -3.24730 | 2.85061  |
| H                              | 4.90582  | 1.75217  | 0.37356  | H  | 3.91269  | -0.54342 | 3.24627  |
| H                              | 3.17820  | -0.75541 | -2.77771 | H  | 2.23793  | 0.02692  | 3.43011  |
| H                              | 4.46527  | -1.41618 | -1.73363 | H  | 3.44046  | 1.04911  | 2.60726  |
| H                              | 4.84678  | -0.15120 | -2.92426 | H  | 4.64528  | 1.28906  | 0.69898  |
| H                              | 3.98606  | -1.10915 | 3.21612  | H  | 4.47069  | 1.05304  | -1.06625 |
| H                              | 3.04967  | 0.37035  | 2.87929  | H  | 5.46392  | -0.05933 | -0.10923 |
| H                              | 4.58800  | 0.06871  | 2.02862  | H  | 4.06050  | -2.22282 | -2.30847 |
| H                              | 1.08453  | -2.43594 | 1.27721  | H  | 3.65788  | -0.52552 | -2.65005 |
| H                              | 0.96706  | -1.04354 | 2.38753  | H  | 2.43338  | -1.79867 | -2.88871 |
| H                              | 1.96985  | -2.45526 | 2.82872  | H  | 1.78359  | -4.33002 | -0.45602 |
| H                              | 3.25724  | -2.87511 | -0.05313 | H  | 1.13209  | -3.33267 | -1.78022 |
| H                              | 4.00654  | -3.05054 | 1.55487  | H  | 0.20687  | -3.52427 | -0.26865 |
| H                              | 4.73673  | -1.96063 | 0.36157  | H  | -1.11238 | -1.71207 | 0.09960  |
| H                              | 0.43280  | 4.32715  | 0.30796  | H  | -0.17958 | -0.24611 | -1.11356 |
| H                              | 0.42372  | 3.39234  | -1.22945 | H  | -2.86541 | 2.96118  | 1.19970  |
| H                              | 1.49267  | 2.88626  | 0.11929  | H  | -1.56721 | 1.96124  | 1.93287  |
| H                              | -2.18872 | 4.29127  | 0.48995  | H  | -3.00084 | 2.40380  | 2.88851  |
| H                              | -3.22827 | 2.83575  | 0.60614  | H  | -5.25336 | 1.53938  | 2.32338  |
| H                              | -2.47920 | 3.27347  | -0.96199 | H  | -5.50748 | 0.24451  | 1.13434  |
| H                              | 0.31499  | 2.04928  | 2.69531  | H  | -5.13626 | 1.90423  | 0.58128  |
| H                              | -1.45772 | 1.95030  | 2.90417  | H  | -2.07096 | -0.46264 | 2.61393  |
| H                              | -0.68247 | 3.54487  | 2.62836  | H  | -3.61938 | -1.23440 | 2.18316  |
| H                              | 0.10579  | 0.38217  | -1.57250 | H  | -3.57362 | 0.02081  | 3.44408  |
| INT(11''-6) <sub>tBu</sub>     |          |          |          | H  | -5.61142 | -1.04679 | -2.42420 |
| SCF Energy = -975.879430036    |          |          |          | H  | -4.81732 | 0.55142  | -2.43923 |
| Enthalpy 0K = -975.281619      |          |          |          | H  | -5.75835 | 0.03088  | -1.01720 |
| Enthalpy 298K = -975.243173    |          |          |          | H  | -2.01352 | -1.98218 | -2.06595 |
| Free Energy 298K = -975.347513 |          |          |          | H  | -2.61876 | -0.61689 | -3.05654 |
| SCF(DCM) = -975.929493073      |          |          |          | H  | -3.50276 | -2.16415 | -3.02501 |
| SCF(BP86-D3) = -0.11019777     |          |          |          | H  | -3.28459 | -2.65344 | 0.11349  |
| Lowest Frequencies = 17.7088   |          |          |          | H  | -4.68933 | -2.94142 | -0.94531 |
| 34.2506 cm <sup>-1</sup>       |          |          |          | H  | -4.86148 | -1.89135 | 0.47631  |
| C                              | 2.81848  | -1.31188 | -0.81293 | H  | -0.22941 | 4.02207  | -1.39027 |
| C                              | 1.92013  | -2.21780 | -0.10072 | H  | -0.73031 | 3.36037  | 0.20387  |
| C                              | 1.87129  | -1.80227 | 1.27302  | H  | -1.18268 | 2.48271  | -1.27753 |
| C                              | 2.75249  | -0.64009 | 1.43590  | H  | 2.18311  | 4.31524  | -0.08424 |
| C                              | 3.37216  | -0.38389 | 0.15563  | H  | 3.29641  | 2.96889  | 0.31512  |
|                                |          |          |          | H  | 1.87471  | 3.29343  | 1.35978  |



H 1.20659 1.81438 -3.12423  
H 2.87323 1.83959 -2.47612  
H 1.97782 3.38199 -2.69472  
H -0.37974 0.21088 0.89921

TS(11''-6)<sub>tBu</sub>

SCF Energy = -975.858656966  
Enthalpy 0K = -975.261138  
Enthalpy 298K = -975.222776  
Free Energy 298K = -975.326488  
SCF(DCM) = -975.906969151  
SCF(BP86-D3) = -0.11226886  
Lowest Frequencies = -75.1671  
22.5702 cm<sup>-1</sup>

C -3.14809 -0.00710 0.93833  
C -2.46273 -1.14724 1.53390  
C -2.09073 -2.04056 0.47210  
C -2.56642 -1.48030 -0.79390  
C -3.23480 -0.24639 -0.51273  
Rh -1.09316 0.01181 0.16607  
B 1.00812 -0.64298 1.24113  
P 2.41995 -0.06549 0.09395  
C 2.84369 -1.41213 -1.23727  
C 4.03423 -0.95463 -2.10618  
C -2.21960 -1.37265 2.99691  
C -1.46292 -3.39334 0.63435  
C -2.48091 -2.15735 -2.12925  
C -4.08422 0.51421 -1.49212  
C -3.87382 1.05916 1.70262  
P -0.65898 2.16816 -0.63770  
C -0.17987 2.27532 -2.43579  
C -2.07487 3.37977 -0.54377  
C 0.66966 3.16064 0.19984  
C 3.96414 0.65227 1.02741  
C 3.42889 1.37607 2.28222  
C 4.91153 -0.48396 1.47645  
C 4.72009 1.66532 0.13949  
C 3.15665 -2.77263 -0.57110  
C 1.60327 -1.55976 -2.14319  
H -0.89199 -3.47009 1.57126  
H -0.78798 -3.64000 -0.20065  
H -2.25288 -4.16730 0.65765  
H -3.32987 -2.85683 -2.25429  
H -1.55728 -2.74742 -2.23399  
H -2.52500 -1.43568 -2.95926  
H -3.60164 0.60830 -2.47794  
H -4.34136 1.52011 -1.13080  
H -5.03756 -0.02428 -1.64680  
H -4.85304 0.67267 2.04430  
H -4.07153 1.95001 1.08839  
H -3.31417 1.37193 2.59816  
H -2.96371 -2.08024 3.40613  
H -2.29531 -0.43664 3.57044  
H -1.21897 -1.79930 3.17603  
H 1.14209 -0.68864 2.44381  
H 0.04715 0.39698 1.34155  
H 1.37689 -0.62510 -2.68259  
H 0.70589 -1.85134 -1.57259  
H 1.79736 -2.34768 -2.89471  
H 4.19577 -1.69400 -2.91188  
H 4.97225 -0.89122 -1.53301

H 3.84841 0.02295 -2.58180  
H 2.30522 -3.13530 0.02630  
H 4.03808 -2.72600 0.08587  
H 3.36934 -3.52174 -1.35737  
H 5.56954 2.08481 0.70932  
H 4.07467 2.50789 -0.16111  
H 5.12950 1.20852 -0.77415  
H 2.90358 0.69118 2.96573  
H 2.74864 2.20691 2.03232  
H 4.28562 1.80966 2.82989  
H 4.39448 -1.22719 2.10524  
H 5.72916 -0.04508 2.07948  
H 5.38168 -1.00639 0.62830  
H 0.72027 4.16901 -0.24185  
H 1.63272 2.64728 0.06510  
H 0.44588 3.23867 1.27486  
H -0.08117 3.33044 -2.74131  
H -0.94369 1.78478 -3.05840  
H 0.78143 1.75935 -2.57506  
H -2.39944 3.49356 0.50165  
H -2.92177 3.03735 -1.15472  
H -1.74029 4.35976 -0.92154  
H 0.55117 -1.63930 0.71163

TS(11''-9')<sub>2tBu</sub>

SCF Energy = -975.867013891  
Enthalpy 0K = -975.266539  
Enthalpy 298K = -975.229255  
Free Energy 298K = -975.328983  
SCF(DCM) = -975.910851044  
SCF(BP86-D3) = -0.12100372  
Lowest Frequencies = -109.9520  
21.1844 cm<sup>-1</sup>

C -1.68594 -1.96082 -0.92236  
C -2.73351 -1.11352 -0.39549  
C -2.53345 -0.92992 1.01890  
C -1.34173 -1.68262 1.38747  
C -0.84606 -2.34548 0.17550  
Rh -0.57173 -0.06478 0.18551  
B 0.89316 1.71459 -0.99541  
P 1.71739 0.20494 -0.12594  
C 2.80840 0.62285 1.42889  
C 2.16792 1.79504 2.19630  
C -3.95592 -0.74559 -1.18651  
C -3.50649 -0.33094 1.99999  
C -0.93576 -2.02885 2.79399  
C 0.15513 -3.46618 0.18416  
C -1.68361 -2.52250 -2.31878  
P -1.04293 2.53517 -0.50010  
C -0.86683 3.83668 -1.84512  
C -2.88401 2.28634 -0.69417  
C -0.95936 3.54385 1.05722  
C 2.71265 -0.78031 -1.48093  
C 1.69524 -1.27802 -2.52439  
C 3.69691 0.18205 -2.19096  
C 3.47604 -1.98024 -0.88307  
C 2.84763 -0.62060 2.34472  
C 4.24024 1.04135 1.02715  
H -4.14784 0.43967 1.54387  
H -2.99264 0.12338 2.86116  
H -4.18084 -1.11414 2.39429

|   |          |          |          |   |          |          |          |
|---|----------|----------|----------|---|----------|----------|----------|
| H | -1.53069 | -2.88875 | 3.15616  | C | 2.36122  | -0.37990 | 2.52923  |
| H | -1.10421 | -1.19122 | 3.48780  | C | -3.00725 | 2.75836  | -0.55568 |
| H | 0.12485  | -2.31502 | 2.85591  | C | -3.01133 | 1.47055  | 2.40252  |
| H | 0.93584  | -3.32401 | 0.94640  | C | -2.70324 | -1.70715 | 2.03428  |
| H | 0.64180  | -3.61387 | -0.79099 | C | -2.83791 | -2.38965 | -1.08380 |
| H | -0.37024 | -4.40869 | 0.43083  | C | -2.86628 | 0.42195  | -2.68689 |
| H | -2.55597 | -3.18676 | -2.46566 | P | 2.26438  | 2.47919  | -0.27411 |
| H | -0.78516 | -3.12272 | -2.52334 | C | 3.62175  | 3.44262  | -1.08265 |
| H | -1.74346 | -1.73478 | -3.08791 | C | 0.69915  | 3.10967  | -1.02742 |
| H | -4.57198 | -1.65563 | -1.31981 | C | 2.23272  | 3.08790  | 1.47281  |
| H | -3.71292 | -0.38445 | -2.19940 | C | 1.39998  | -2.12715 | -1.51105 |
| H | -4.58722 | 0.00041  | -0.68419 | C | 0.58256  | -1.52409 | -2.67420 |
| H | 0.87157  | 1.67970  | -2.19766 | C | 2.84938  | -2.34683 | -2.00314 |
| H | -0.27859 | 0.74744  | 1.48611  | C | 0.78689  | -3.48018 | -1.09513 |
| H | 4.24428  | 1.91248  | 0.35177  | C | 0.96739  | -2.44858 | 2.28714  |
| H | 4.80974  | 0.22556  | 0.55756  | C | 3.31231  | -2.36321 | 1.33896  |
| H | 4.78718  | 1.33013  | 1.94303  | H | -2.68602 | 2.52101  | 2.34943  |
| H | 2.75394  | 1.97462  | 3.11581  | H | -2.46622 | 0.99141  | 3.22990  |
| H | 1.13069  | 1.57785  | 2.50092  | H | -4.08608 | 1.46656  | 2.66212  |
| H | 2.17872  | 2.72661  | 1.60782  | H | -3.76369 | -1.99741 | 2.17000  |
| H | 3.29096  | -1.49867 | 1.84916  | H | -2.34515 | -1.30516 | 2.99421  |
| H | 1.83757  | -0.88749 | 2.69526  | H | -2.13637 | -2.62200 | 1.80588  |
| H | 3.46367  | -0.39723 | 3.23471  | H | -2.38728 | -3.15624 | -0.43584 |
| H | 3.95982  | -2.53980 | -1.70441 | H | -2.39604 | -2.48538 | -2.08749 |
| H | 2.80952  | -2.67905 | -0.35383 | H | -3.91384 | -2.63233 | -1.17311 |
| H | 4.27514  | -1.67352 | -0.19004 | H | -3.90428 | 0.69790  | -2.95166 |
| H | 1.13470  | -0.44826 | -2.98361 | H | -2.61088 | -0.48787 | -3.25018 |
| H | 0.97355  | -1.98212 | -2.08952 | H | -2.21629 | 1.23793  | -3.04413 |
| H | 2.24206  | -1.80029 | -3.33034 | H | -4.08351 | 2.94860  | -0.72960 |
| H | 3.17339  | 1.03927  | -2.64269 | H | -2.47903 | 3.04361  | -1.47941 |
| H | 4.19615  | -0.37416 | -3.00608 | H | -2.68339 | 3.42855  | 0.25531  |
| H | 4.48466  | 0.56522  | -1.52816 | H | 2.53004  | 0.63384  | -1.88602 |
| H | -1.61796 | 4.41987  | 0.94474  | H | -0.06052 | 0.73510  | 1.47864  |
| H | 0.07079  | 3.88325  | 1.23430  | H | 4.06865  | -1.77456 | 0.79477  |
| H | -1.29397 | 2.93641  | 1.90998  | H | 3.12636  | -3.29794 | 0.78764  |
| H | -1.62691 | 4.62015  | -1.69418 | H | 3.75130  | -2.64472 | 2.31363  |
| H | -1.02280 | 3.36419  | -2.82731 | H | 2.71875  | -0.78237 | 3.49439  |
| H | 0.13955  | 4.27623  | -1.81864 | H | 1.47884  | 0.24831  | 2.73789  |
| H | -3.27693 | 1.72436  | 0.16036  | H | 3.16288  | 0.25176  | 2.11410  |
| H | -3.08620 | 1.73899  | -1.62452 | H | 0.66093  | -3.30560 | 1.66659  |
| H | -3.36489 | 3.27727  | -0.74677 | H | 0.06970  | -1.86566 | 2.54643  |
| H | 1.26166  | 2.74265  | -0.47414 | H | 1.39183  | -2.85360 | 3.22430  |

9' <sup>tBu</sup>

SCF Energy = -975.885874932  
 Enthalpy 0K = -975.286815  
 Enthalpy 298K = -975.248328  
 Free Energy 298K = -975.351644  
 SCF(DCM) = -975.934307615  
 SCF(BP86-D3) = -0.11795984  
 Lowest Frequencies = 24.3688  
 40.8081 cm<sup>-1</sup>

|    |          |          |          |
|----|----------|----------|----------|
| C  | -2.74586 | 0.21667  | -1.20501 |
| C  | -2.79863 | 1.31364  | -0.20768 |
| C  | -2.79016 | 0.75186  | 1.10042  |
| C  | -2.60204 | -0.69595 | 0.93519  |
| C  | -2.68079 | -1.01088 | -0.51278 |
| Rh | -0.82954 | 0.23194  | 0.19691  |
| B  | 2.56240  | 0.59427  | -0.67078 |
| P  | 1.28035  | -0.82704 | -0.05536 |
| C  | 2.02057  | -1.55818 | 1.59595  |

|   |          |          |          |
|---|----------|----------|----------|
| C | 2.36122  | -0.37990 | 2.52923  |
| C | -3.00725 | 2.75836  | -0.55568 |
| C | -3.01133 | 1.47055  | 2.40252  |
| C | -2.70324 | -1.70715 | 2.03428  |
| C | -2.83791 | -2.38965 | -1.08380 |
| C | -2.86628 | 0.42195  | -2.68689 |
| P | 2.26438  | 2.47919  | -0.27411 |
| C | 3.62175  | 3.44262  | -1.08265 |
| C | 0.69915  | 3.10967  | -1.02742 |
| C | 2.23272  | 3.08790  | 1.47281  |
| C | 1.39998  | -2.12715 | -1.51105 |
| C | 0.58256  | -1.52409 | -2.67420 |
| C | 2.84938  | -2.34683 | -2.00314 |
| C | 0.78689  | -3.48018 | -1.09513 |
| C | 0.96739  | -2.44858 | 2.28714  |
| C | 3.31231  | -2.36321 | 1.33896  |
| H | -2.68602 | 2.52101  | 2.34943  |
| H | -2.46622 | 0.99141  | 3.22990  |
| H | -4.08608 | 1.46656  | 2.66212  |
| H | -3.76369 | -1.99741 | 2.17000  |
| H | -2.34515 | -1.30516 | 2.99421  |
| H | -2.13637 | -2.62200 | 1.80588  |
| H | -2.38728 | -3.15624 | -0.43584 |
| H | -2.39604 | -2.48538 | -2.08749 |
| H | -3.91384 | -2.63233 | -1.17311 |
| H | -3.90428 | 0.69790  | -2.95166 |
| H | -2.61088 | -0.48787 | -3.25018 |
| H | -2.21629 | 1.23793  | -3.04413 |
| H | -4.08351 | 2.94860  | -0.72960 |
| H | -2.47903 | 3.04361  | -1.47941 |
| H | -2.68339 | 3.42855  | 0.25531  |
| H | 2.53004  | 0.63384  | -1.88602 |
| H | -0.06052 | 0.73510  | 1.47864  |
| H | 4.06865  | -1.77456 | 0.79477  |
| H | 3.12636  | -3.29794 | 0.78764  |
| H | 3.75130  | -2.64472 | 2.31363  |
| H | 2.71875  | -0.78237 | 3.49439  |
| H | 1.47884  | 0.24831  | 2.73789  |
| H | 3.16288  | 0.25176  | 2.11410  |
| H | 0.66093  | -3.30560 | 1.66659  |
| H | 0.06970  | -1.86566 | 2.54643  |
| H | 1.39183  | -2.85360 | 3.22430  |
| H | 0.74511  | -4.14675 | -1.97634 |
| H | -0.23957 | -3.37370 | -0.71030 |
| H | 1.39072  | -3.99402 | -0.33049 |
| H | 1.02358  | -0.58110 | -3.03843 |
| H | -0.46105 | -1.32500 | -2.38128 |
| H | 0.57625  | -2.23612 | -3.51985 |
| H | 3.33483  | -1.40429 | -2.29793 |
| H | 2.81777  | -2.99974 | -2.89517 |
| H | 3.48583  | -2.84484 | -1.25842 |
| H | 2.14489  | 4.18596  | 1.48403  |
| H | 3.16207  | 2.79118  | 1.98218  |
| H | 1.37511  | 2.64192  | 1.99854  |
| H | 3.45302  | 4.52504  | -0.97195 |
| H | 3.66283  | 3.17900  | -2.15037 |
| H | 4.58110  | 3.17013  | -0.61658 |
| H | -0.13883 | 2.52609  | -0.59232 |
| H | 0.72770  | 2.94209  | -2.11511 |
| H | 0.54837  | 4.17997  | -0.81583 |
| H | 3.67341  | 0.33099  | -0.25342 |

TS (9'-9)<sub>tBu</sub>  
 SCF Energy = -975.881893429  
 Enthalpy 0K = -975.283866  
 Enthalpy 298K = -975.245460  
 Free Energy 298K = -975.349903  
 SCF(DCM) = -975.930430668  
 SCF(BP86-D3) = -0.11511837  
 Lowest Frequencies = -28.2266  
 22.4566 cm<sup>-1</sup>  
 C -2.74962 -0.53751 1.20321  
 C -2.60216 -1.67538 0.26516  
 C -2.70531 -1.19321 -1.07150  
 C -2.76203 0.27248 -0.98511  
 C -2.89713 0.64458 0.44501  
 Rh -0.86535 -0.29227 -0.20783  
 B 2.11752 -0.40274 1.02388  
 P 1.05587 1.01370 0.06287  
 C 1.88664 1.65264 -1.57568  
 C 2.42614 0.43453 -2.34938  
 C -2.49570 -3.10791 0.69763  
 C -2.80282 -2.00565 -2.33301  
 C -3.00488 1.19958 -2.13697  
 C -3.28277 2.00739 0.94054  
 C -2.83062 -0.68180 2.69530  
 P 2.72619 -2.14700 0.36192  
 C 3.01995 -3.16068 1.88468  
 C 1.59892 -3.18601 -0.67456  
 C 4.36473 -2.20652 -0.50274  
 C 0.96304 2.43789 1.40256  
 C 0.14366 1.86827 2.58110  
 C 2.34004 2.87639 1.94918  
 C 0.22459 3.65275 0.80304  
 C 0.80712 2.34739 -2.43519  
 C 3.06570 2.61434 -1.31536  
 H -2.31664 -2.98782 -2.22738  
 H -2.33717 -1.49043 -3.18696  
 H -3.86345 -2.18529 -2.58853  
 H -4.09359 1.30425 -2.31128  
 H -2.55450 0.81932 -3.06657  
 H -2.60186 2.20552 -1.94384  
 H -2.89361 2.80791 0.29331  
 H -2.93565 2.19663 1.96759  
 H -4.38543 2.10059 0.94302  
 H -3.80532 -1.11525 2.98804  
 H -2.73215 0.28734 3.20697  
 H -2.04834 -1.35325 3.08684  
 H -3.48464 -3.48408 1.02152  
 H -1.81367 -3.22499 1.55635  
 H -2.14730 -3.75779 -0.11964  
 H 1.43590 -0.74170 1.97533  
 H -0.04359 -0.66204 -1.50052  
 H 3.82312 2.17462 -0.64575  
 H 2.74085 3.57804 -0.89381  
 H 3.56203 2.83519 -2.27797  
 H 2.76063 0.76146 -3.35063  
 H 1.65587 -0.34251 -2.49482  
 H 3.29662 -0.00702 -1.83983  
 H 0.38393 3.23654 -1.94290  
 H -0.01874 1.65535 -2.66690  
 H 1.25829 2.67867 -3.38857

H 0.02578 4.38978 1.60263  
 H -0.74372 3.36664 0.36163  
 H 0.81893 4.16636 0.03058  
 H 0.69154 1.07750 3.11755  
 H -0.81709 1.44867 2.24416  
 H -0.06438 2.68138 3.30050  
 H 2.89721 2.03450 2.38838  
 H 2.17349 3.61689 2.75345  
 H 2.97511 3.35715 1.19267  
 H 4.72722 -3.24620 -0.53340  
 H 5.08582 -1.58541 0.05035  
 H 4.27799 -1.82856 -1.53129  
 H 3.42926 -4.14863 1.62172  
 H 2.07064 -3.28332 2.42754  
 H 3.72982 -2.62855 2.53642  
 H 1.46336 -2.71220 -1.65765  
 H 0.61584 -3.24843 -0.18255  
 H 2.02066 -4.19613 -0.79988  
 H 3.15822 0.09309 1.41758

9<sub>tBu</sub>  
 SCF Energy = -975.905470765  
 Enthalpy 0K = -975.306487  
 Enthalpy 298K = -975.267868  
 Free Energy 298K = -975.372129  
 SCF(DCM) = -975.952912616  
 SCF(BP86-D3) = -0.11336630  
 Lowest Frequencies = 20.9915  
 36.2900 cm<sup>-1</sup>  
 Rh 0.88516 0.27935 0.17759  
 C 2.75705 -0.38723 1.08340  
 C 2.77000 -0.96907 -0.26132  
 C 2.77761 0.09799 -1.21687  
 C 2.79251 1.35491 -0.47212  
 C 2.82934 1.06397 0.93737  
 C 2.95021 -1.14912 2.36609  
 H 2.45465 -2.13198 2.33773  
 H 2.55198 -0.59502 3.23017  
 H 4.02666 -1.32569 2.55114  
 C 2.93606 -2.43502 -0.54744  
 H 2.57927 -2.71199 -1.55105  
 H 2.41122 -3.05924 0.19208  
 H 4.00861 -2.70183 -0.49665  
 C 2.92686 -0.01921 -2.70889  
 H 3.98655 0.10064 -3.00312  
 H 2.35160 0.75445 -3.24274  
 H 2.59513 -1.00029 -3.08157  
 C 2.90631 2.71885 -1.09429  
 H 2.54386 3.50892 -0.41865  
 H 2.34658 2.78504 -2.04064  
 H 3.96469 2.94263 -1.32419  
 C 3.04315 2.05394 2.05048  
 H 4.12457 2.19512 2.23366  
 H 2.58833 1.71144 2.99247  
 H 2.61807 3.04106 1.81045  
 H 0.20823 0.65269 1.54883  
 P -1.09162 -0.93805 -0.02673  
 C -1.32551 -2.26086 -1.43407  
 C -2.77009 -2.23072 -1.98439  
 H -3.03808 -1.22782 -2.35644  
 H -3.52299 -2.54318 -1.24680

H -2.83963 -2.92917 -2.83900  
 C -0.96089 -3.67048 -0.91958  
 H -1.01797 -4.38602 -1.75996  
 H -1.64577 -4.03505 -0.13859  
 H 0.06732 -3.70611 -0.52329  
 C -0.36262 -1.89334 -2.58225  
 H 0.68314 -1.86200 -2.24321  
 H -0.60520 -0.91981 -3.03615  
 H -0.44754 -2.66194 -3.37192  
 C -1.99983 -1.47609 1.61041  
 C -2.28334 -0.23225 2.47221  
 H -3.08644 0.38776 2.03958  
 H -1.38242 0.38826 2.61379  
 H -2.62839 -0.55943 3.46979  
 C -1.02523 -2.39868 2.37969  
 H -0.08311 -1.87288 2.60547  
 H -0.78361 -3.31750 1.82277  
 H -1.48925 -2.70182 3.33617  
 C -3.34041 -2.19746 1.35329  
 H -3.81231 -2.42165 2.32737  
 H -3.21904 -3.15552 0.82676  
 H -4.04646 -1.57315 0.78049  
 B -1.26242 0.84389 -0.81051  
 H -0.12085 1.49164 -0.59375  
 H -1.39798 0.78770 -2.01294  
 P -2.46308 2.31576 -0.32234  
 C -4.26005 1.88292 -0.39751  
 H -4.87601 2.78869 -0.28433  
 H -4.51038 1.16857 0.40096  
 H -4.47151 1.41608 -1.37198  
 C -2.24782 3.63706 -1.60125  
 H -2.47496 3.21857 -2.59348  
 H -1.20178 3.98045 -1.59294  
 H -2.91478 4.48904 -1.39620  
 C -2.17507 3.18562 1.28266  
 H -2.77142 4.11070 1.31943  
 H -1.10440 3.43138 1.35690  
 H -2.44698 2.53804 2.12711

10<sub>Ph</sub>

SCF Energy = -1163.99812594  
 Enthalpy 0K = -1163.414270  
 Enthalpy 298K = -1163.374498  
 Free Energy 298K = -1163.487011  
 SCF(DCM) = -1164.03218883  
 SCF(BP86-D3) = -0.10800270  
 Lowest Frequencies = 10.8873  
 14.8529 cm<sup>-1</sup>  
 C 3.36786 -0.39084 1.38618  
 C 2.21912 -0.07593 2.16802  
 C 1.81737 1.29938 1.83518  
 C 2.74689 1.83175 0.88358  
 C 3.67545 0.76560 0.53064  
 Rh 1.68847 0.09194 -0.10561  
 C 1.46422 1.27420 -1.85679  
 C 1.59787 -0.91866 3.24493  
 C 0.71821 2.05935 2.52014  
 C 2.81546 3.24769 0.39033  
 C 4.91872 0.94291 -0.29503  
 C 4.22960 -1.61529 1.50885  
 B -0.72379 -0.69972 0.36927

P -2.43740 -0.32294 -0.52882  
 C -3.83951 -1.30241 0.15508  
 P 1.93541 -1.71018 -1.55471  
 C 0.57046 -1.98140 -2.79414  
 C -2.95807 1.43594 -0.60317  
 C 3.43812 -1.67296 -2.65431  
 C 2.03899 -3.39530 -0.76618  
 H 1.83796 3.75157 0.44831  
 H 3.16450 3.30296 -0.65286  
 H 3.52484 3.82898 1.00753  
 H 5.71041 1.43353 0.30188  
 H 4.73661 1.57632 -1.17796  
 H 5.32298 -0.01981 -0.64404  
 H 4.63945 -1.93394 0.53666  
 H 3.68271 -2.46242 1.95044  
 H 5.09293 -1.40243 2.16648  
 H 1.94600 -0.59278 4.24277  
 H 1.86017 -1.98220 3.13288  
 H 0.49882 -0.84187 3.23692  
 H 1.09170 2.49853 3.46406  
 H -0.12844 1.40294 2.77294  
 H 0.33959 2.88278 1.89518  
 H -0.88237 -0.31806 1.50591  
 H -2.40932 -0.65514 -1.92297  
 H 0.79772 -2.86330 -3.41483  
 H 0.46563 -1.10099 -3.44493  
 H -0.37354 -2.15276 -2.25629  
 H 3.44040 -2.53752 -3.33806  
 H 4.35300 -1.69873 -2.04305  
 H 3.43227 -0.74192 -3.24170  
 H 1.12472 -3.56853 -0.17827  
 H 2.90763 -3.44727 -0.09462  
 H 2.13305 -4.17454 -1.54044  
 H 2.45690 1.45131 -2.30392  
 H 0.80551 0.83671 -2.62384  
 H 1.03079 2.23859 -1.54611  
 H -0.03740 0.11968 -0.37061  
 H -0.55311 -1.89170 0.24380  
 C -3.10381 2.08735 -1.84569  
 C -3.48264 3.43871 -1.88613  
 C -3.72061 4.13819 -0.69239  
 C -3.57846 3.48922 0.54668  
 C -3.19531 2.14128 0.59675  
 H -2.92704 1.54384 -2.78015  
 H -3.59794 3.94063 -2.85167  
 H -4.02215 5.18965 -0.72633  
 H -3.77112 4.03322 1.47658  
 H -3.09154 1.63764 1.56361  
 C -5.16836 -0.97423 -0.19057  
 C -6.22589 -1.74351 0.31425  
 C -5.96397 -2.83153 1.16510  
 C -4.64284 -3.15216 1.51493  
 C -3.57614 -2.38983 1.01291  
 H -5.37589 -0.11919 -0.84217  
 H -7.25619 -1.49101 0.04548  
 H -6.79317 -3.42764 1.55868  
 H -4.43940 -3.99537 2.18216  
 H -2.54621 -2.63681 1.28680

TS(10<sup>-11''</sup>)<sub>1Ph</sub>

SCF Energy = -1163.97193239

Enthalpy 0K = -1163.390923  
 Enthalpy 298K = -1163.351213  
 Free Energy 298K = -1163.462730  
 SCF(DCM) = -1164.01782790  
 SCF(BP86-D3) = -0.11242551  
 Lowest Frequencies = -896.3359  
 15.4424 cm<sup>-1</sup>  
 C 3.32326 -0.41338 1.24337  
 C 2.19739 -0.09682 2.09847  
 C 1.81491 1.27228 1.82495  
 C 2.73733 1.80387 0.83455  
 C 3.67295 0.77410 0.47232  
 Rh 1.54329 0.06024 -0.09506  
 C 0.81168 1.39582 -1.74773  
 C 1.63452 -0.96967 3.18328  
 C 0.76931 2.06003 2.56285  
 C 2.77103 3.22346 0.34509  
 C 4.89434 0.95440 -0.38733  
 C 4.16546 -1.65501 1.33794  
 B -0.50879 -0.75067 0.43273  
 P -2.20830 -0.32758 -0.48322  
 C -3.63064 -1.28206 0.20919  
 P 1.75663 -1.72271 -1.56478  
 C 0.40706 -1.96375 -2.82587  
 C -2.73852 1.43399 -0.57365  
 C 3.26752 -1.67022 -2.65963  
 C 1.86518 -3.42406 -0.81725  
 H 1.77970 3.70119 0.39061  
 H 3.14117 3.29588 -0.69032  
 H 3.45034 3.82443 0.97730  
 H 5.71676 1.41358 0.19280  
 H 4.70069 1.61373 -1.24972  
 H 5.27102 -0.00471 -0.77592  
 H 4.60636 -1.93914 0.36890  
 H 3.59530 -2.51212 1.72721  
 H 5.00656 -1.47951 2.03433  
 H 2.11254 -0.73329 4.15196  
 H 1.80434 -2.03873 2.98114  
 H 0.54963 -0.82153 3.30108  
 H 1.21142 2.57089 3.43842  
 H -0.03692 1.40694 2.93149  
 H 0.31370 2.83237 1.92312  
 H -0.74319 -0.33073 1.54874  
 H -2.24975 -0.66734 -1.87662  
 H 0.67336 -2.78872 -3.50640  
 H 0.26845 -1.04510 -3.41523  
 H -0.53159 -2.21500 -2.31079  
 H 3.29808 -2.55084 -3.32237  
 H 4.17687 -1.65616 -2.04020  
 H 3.24805 -0.75538 -3.27242  
 H 0.96708 -3.60343 -0.20741  
 H 2.75334 -3.49296 -0.17313  
 H 1.93396 -4.18595 -1.61091  
 H 1.79765 1.49077 -2.22408  
 H 0.09635 1.05762 -2.51443  
 H 0.48834 2.37348 -1.36370  
 H 0.14853 0.55078 -0.75041  
 H -0.49611 -1.96628 0.36386  
 C -3.05256 2.02948 -1.81364  
 C -3.46142 3.37182 -1.86420  
 C -3.56283 4.12076 -0.68089

C -3.25300 3.52935 0.55632  
 C -2.83872 2.19053 0.61427  
 H -2.98470 1.44758 -2.73971  
 H -3.70721 3.82830 -2.82804  
 H -3.88859 5.16475 -0.72126  
 H -3.34004 4.11086 1.47947  
 H -2.60524 1.73137 1.58056  
 C -4.92178 -1.10780 -0.33437  
 C -5.99879 -1.83929 0.18457  
 C -5.79462 -2.73699 1.24729  
 C -4.51215 -2.90466 1.79201  
 C -3.42552 -2.18047 1.27502  
 H -5.08878 -0.39938 -1.15289  
 H -6.99899 -1.70668 -0.23930  
 H -6.63876 -3.30469 1.65105  
 H -4.35330 -3.60113 2.62114  
 H -2.42388 -2.31318 1.69430

INT(10-11'' )<sub>Ph</sub>  
 SCF Energy = -1163.98807808  
 Enthalpy 0K = -1163.404256  
 Enthalpy 298K = -1163.363581  
 Free Energy 298K = -1163.476475  
 SCF(DCM) = -1164.03425283  
 SCF(BP86-D3) = -0.11383316  
 Lowest Frequencies = 14.8129  
 22.2518 cm<sup>-1</sup>  
 C 3.47946 0.40039 0.94429  
 C 2.32605 0.15203 1.85021  
 C 1.40168 1.27713 1.70984  
 C 1.86942 2.05835 0.61013  
 C 3.18476 1.54430 0.17076  
 Rh 1.47174 -0.08342 -0.10199  
 C 0.90356 0.79643 -2.72438  
 C 2.31736 -0.83067 2.98433  
 C 0.28094 1.62645 2.64285  
 C 1.23292 3.31576 0.09294  
 C 4.05675 2.19937 -0.86205  
 C 4.77016 -0.36535 0.98016  
 B -0.43835 -1.01348 0.48669  
 P -2.04076 -0.36861 -0.45689  
 C -3.58934 -1.25044 0.04215  
 P 1.92187 -2.20827 -0.92227  
 C 0.75867 -2.88492 -2.21375  
 C -2.47985 1.42591 -0.47138  
 C 3.55253 -2.35929 -1.82533  
 C 2.03127 -3.59902 0.30841  
 H 0.14162 3.31070 0.23717  
 H 1.43961 3.47110 -0.97794  
 H 1.63946 4.19397 0.62949  
 H 4.58538 3.07133 -0.43353  
 H 3.47083 2.57285 -1.71855  
 H 4.82188 1.50941 -1.25094  
 H 5.34832 -0.24909 0.05031  
 H 4.61190 -1.44056 1.16246  
 H 5.40289 0.00652 1.80796  
 H 2.76657 -0.37350 3.88668  
 H 2.90129 -1.73390 2.74980  
 H 1.29222 -1.14070 3.23765  
 H 0.66266 2.27631 3.45281  
 H -0.15728 0.73197 3.10950

|   |          |          |          |
|---|----------|----------|----------|
| H | -0.52533 | 2.17107  | 2.12787  |
| H | -0.66769 | -0.77252 | 1.65734  |
| H | -1.98980 | -0.61284 | -1.86981 |
| H | 1.08865  | -3.88939 | -2.52510 |
| H | 0.76127  | -2.22170 | -3.09238 |
| H | -0.25857 | -2.94503 | -1.80207 |
| H | 3.69805  | -3.39103 | -2.18606 |
| H | 4.38317  | -2.09251 | -1.15611 |
| H | 3.55930  | -1.67322 | -2.68678 |
| H | 1.08261  | -3.66751 | 0.86021  |
| H | 2.84755  | -3.39717 | 1.01935  |
| H | 2.23328  | -4.55089 | -0.20921 |
| H | 1.98209  | 0.61579  | -2.80904 |
| H | 0.36385  | 0.21078  | -3.48251 |
| H | 0.69111  | 1.86819  | -2.84190 |
| H | 0.46997  | 0.50334  | -1.71846 |
| H | -0.56773 | -2.21019 | 0.26915  |
| C | -2.39570 | 2.18051  | -1.65996 |
| C | -2.72087 | 3.54728  | -1.65352 |
| C | -3.13720 | 4.16556  | -0.46378 |
| C | -3.23533 | 3.41456  | 0.72080  |
| C | -2.90885 | 2.04961  | 0.72075  |
| H | -2.09222 | 1.70068  | -2.59689 |
| H | -2.66213 | 4.12384  | -2.58217 |
| H | -3.39895 | 5.22818  | -0.46126 |
| H | -3.57769 | 3.89014  | 1.64529  |
| H | -3.00865 | 1.46624  | 1.64229  |
| C | -4.78803 | -1.05175 | -0.67660 |
| C | -5.95439 | -1.72209 | -0.28297 |
| C | -5.93146 | -2.58376 | 0.82813  |
| C | -4.74091 | -2.77815 | 1.54531  |
| C | -3.56608 | -2.11513 | 1.15411  |
| H | -4.81343 | -0.37349 | -1.53655 |
| H | -6.88273 | -1.57102 | -0.84261 |
| H | -6.84499 | -3.10360 | 1.13348  |
| H | -4.72314 | -3.44824 | 2.41051  |
| H | -2.63335 | -2.26836 | 1.70528  |

TS(10-11''')<sub>2Ph</sub>

SCF Energy = -1163.98790744  
 Enthalpy 0K = -1163.404489  
 Enthalpy 298K = -1163.364391  
 Free Energy 298K = -1163.475840  
 SCF(DCM) = -1164.03409415  
 SCF(BP86-D3) = -0.11263080  
 Lowest Frequencies = -14.8238  
 14.4526 cm<sup>-1</sup>

|    |          |          |          |
|----|----------|----------|----------|
| C  | 3.49258  | 0.48083  | 0.86144  |
| C  | 2.32320  | 0.45788  | 1.78263  |
| C  | 1.44428  | 1.56781  | 1.41623  |
| C  | 1.95736  | 2.10698  | 0.19686  |
| C  | 3.25523  | 1.47139  | -0.11570 |
| Rh | 1.47572  | -0.12017 | -0.09405 |
| P  | 1.87532  | -2.35040 | -0.59876 |
| C  | 0.71038  | -3.14908 | -1.81604 |
| C  | 2.26071  | -0.29216 | 3.07985  |
| C  | 0.32369  | 2.11968  | 2.24605  |
| C  | 1.38448  | 3.26735  | -0.56269 |
| C  | 4.16760  | 1.88668  | -1.23454 |
| C  | 4.74782  | -0.31716 | 1.06512  |
| B  | -0.44199 | -0.90250 | 0.62305  |

|   |          |          |          |
|---|----------|----------|----------|
| P | -2.01077 | -0.29101 | -0.39392 |
| C | -3.54750 | -1.24762 | -0.01547 |
| C | -2.50886 | 1.48682  | -0.33875 |
| C | 3.51685  | -2.67295 | -1.43294 |
| C | 1.91393  | -3.55492 | 0.81608  |
| C | 0.89692  | 0.39377  | -3.02892 |
| H | 0.29311  | 3.34209  | -0.44015 |
| H | 1.61031  | 3.20323  | -1.63911 |
| H | 1.82926  | 4.21206  | -0.19615 |
| H | 4.71407  | 2.81195  | -0.97231 |
| H | 3.61296  | 2.09603  | -2.16425 |
| H | 4.91861  | 1.11265  | -1.45700 |
| H | 5.33136  | -0.42023 | 0.13714  |
| H | 4.54384  | -1.32454 | 1.46310  |
| H | 5.39626  | 0.18943  | 1.80469  |
| H | 2.73696  | 0.30269  | 3.88301  |
| H | 2.79175  | -1.25520 | 3.02752  |
| H | 1.21933  | -0.48873 | 3.37643  |
| H | 0.72579  | 2.83534  | 2.98786  |
| H | -0.20366 | 1.32668  | 2.79728  |
| H | -0.41791 | 2.65221  | 1.63203  |
| H | -0.64973 | -0.50762 | 1.75724  |
| H | -1.89836 | -0.47768 | -1.81112 |
| H | 1.00910  | -4.19563 | -1.98989 |
| H | 0.75394  | -2.60144 | -2.77002 |
| H | -0.31546 | -3.12047 | -1.42331 |
| H | 3.62255  | -3.74321 | -1.67674 |
| H | 4.34326  | -2.37337 | -0.77227 |
| H | 3.57566  | -2.08425 | -2.36144 |
| H | 0.95734  | -3.50539 | 1.35551  |
| H | 2.72897  | -3.28159 | 1.50367  |
| H | 2.08449  | -4.57789 | 0.44327  |
| H | 1.93684  | 0.07999  | -3.18363 |
| H | 0.21525  | -0.24811 | -3.60499 |
| H | 0.77441  | 1.44520  | -3.32682 |
| H | 0.60666  | 0.32731  | -1.94426 |
| H | -0.61894 | -2.10900 | 0.55129  |
| C | -4.63582 | -1.23507 | -0.91413 |
| C | -5.80216 | -1.94920 | -0.60579 |
| C | -5.88958 | -2.67012 | 0.59815  |
| C | -4.80833 | -2.68161 | 1.49313  |
| C | -3.63333 | -1.97517 | 1.18844  |
| H | -4.57610 | -0.66911 | -1.85033 |
| H | -6.64363 | -1.94304 | -1.30561 |
| H | -6.80213 | -3.22577 | 0.83574  |
| H | -4.87510 | -3.24548 | 2.42882  |
| H | -2.78250 | -1.99520 | 1.87676  |
| C | -2.32346 | 2.32999  | -1.45392 |
| C | -2.69773 | 3.68268  | -1.38337 |
| C | -3.26187 | 4.19640  | -0.20457 |
| C | -3.45786 | 3.35579  | 0.90508  |
| C | -3.08298 | 2.00536  | 0.84169  |
| H | -1.90278 | 1.93097  | -2.38345 |
| H | -2.56098 | 4.33014  | -2.25535 |
| H | -3.56073 | 5.24796  | -0.15383 |
| H | -3.91110 | 3.75034  | 1.81987  |
| H | -3.25193 | 1.35214  | 1.70433  |

11''')<sub>Ph</sub>

SCF Energy = -1123.47160186  
 Enthalpy 0K = -1122.934570

Enthalpy 298K = -1122.897388  
Free Energy 298K = -1123.002494  
SCF(DCM) = -1123.51856541  
SCF(BP86-D3) = -0.10252866  
Lowest Frequencies = 20.1660  
25.2345 cm-1

|    |          |          |          |
|----|----------|----------|----------|
| C  | 1.82311  | 0.87868  | 2.04606  |
| C  | 2.81628  | 1.38146  | 1.06287  |
| C  | 3.59221  | 0.29860  | 0.59313  |
| C  | 3.01958  | -0.92201 | 1.18712  |
| C  | 2.01274  | -0.52505 | 2.18948  |
| Rh | 1.32213  | -0.17153 | 0.09421  |
| P  | 1.35846  | -1.22369 | -1.98738 |
| C  | 0.53185  | -2.87867 | -2.20243 |
| C  | 3.00812  | 2.83032  | 0.72456  |
| C  | 4.82446  | 0.37687  | -0.26371 |
| C  | 3.61165  | -2.29585 | 1.09005  |
| C  | 1.42713  | -1.43080 | 3.23098  |
| C  | 0.90813  | 1.74706  | 2.86035  |
| B  | -0.54321 | -1.15050 | 0.61182  |
| P  | -2.04502 | -0.43088 | -0.41848 |
| C  | -3.72076 | -0.86245 | 0.20570  |
| C  | -1.99201 | 1.40132  | -0.66842 |
| C  | 0.61135  | -0.20094 | -3.36495 |
| C  | 3.04052  | -1.57775 | -2.71418 |
| H  | 2.05002  | 3.37335  | 0.69108  |
| H  | 3.52234  | 2.96330  | -0.24005 |
| H  | 3.62576  | 3.32314  | 1.49938  |
| H  | 5.71400  | 0.57213  | 0.36417  |
| H  | 4.76518  | 1.19139  | -1.00385 |
| H  | 5.01508  | -0.56232 | -0.80393 |
| H  | 4.07615  | -2.47829 | 0.10905  |
| H  | 2.85846  | -3.07688 | 1.27428  |
| H  | 4.40570  | -2.41250 | 1.85293  |
| H  | 2.13649  | -1.53140 | 4.07397  |
| H  | 1.22930  | -2.43803 | 2.83365  |
| H  | 0.48163  | -1.03736 | 3.63130  |
| H  | 1.44309  | 2.16288  | 3.73471  |
| H  | 0.04487  | 1.17622  | 3.23528  |
| H  | 0.52343  | 2.59732  | 2.27475  |
| H  | -0.62033 | -2.35278 | 0.44402  |
| H  | -0.83311 | -0.80045 | 1.74396  |
| H  | -2.14884 | -0.91975 | -1.76541 |
| H  | 0.62881  | -0.76420 | -4.31252 |
| H  | 1.19911  | 0.72303  | -3.48084 |
| H  | -0.42550 | 0.07891  | -3.12587 |
| H  | 2.92859  | -1.99947 | -3.72647 |
| H  | 3.57641  | -2.30567 | -2.08623 |
| H  | 3.62706  | -0.64911 | -2.77101 |
| H  | -0.53554 | -2.80331 | -1.95238 |
| H  | 0.99085  | -3.60153 | -1.51086 |
| H  | 0.64803  | -3.23277 | -3.23968 |
| C  | -3.16227 | 2.17979  | -0.77756 |
| C  | -3.06714 | 3.56323  | -0.99828 |
| C  | -1.80983 | 4.17695  | -1.11893 |
| C  | -0.63792 | 3.40825  | -1.00989 |
| C  | -0.73723 | 2.02904  | -0.77721 |
| H  | -4.14450 | 1.70554  | -0.68555 |
| H  | -3.97944 | 4.16236  | -1.07701 |
| H  | -1.73967 | 5.25498  | -1.29403 |
| H  | 0.34421  | 3.88199  | -1.10551 |

|   |          |          |          |
|---|----------|----------|----------|
| H | 0.20914  | 1.43803  | -0.68757 |
| C | -4.72874 | -1.28928 | -0.68580 |
| C | -5.99912 | -1.62670 | -0.19379 |
| C | -6.26606 | -1.53965 | 1.18223  |
| C | -5.26218 | -1.11925 | 2.07125  |
| C | -3.98851 | -0.78443 | 1.58955  |
| H | -4.52447 | -1.36160 | -1.75974 |
| H | -6.77825 | -1.95966 | -0.88637 |
| H | -7.25692 | -1.80516 | 1.56358  |
| H | -5.46911 | -1.05891 | 3.14417  |
| H | -3.20142 | -0.47579 | 2.28462  |

TS(11''-11)<sub>Ph</sub>

SCF Energy = -1123.46620337  
Enthalpy 0K = -1122.929634  
Enthalpy 298K = -1122.892661  
Free Energy 298K = -1122.998479  
SCF(DCM) = -1123.51402288  
SCF(BP86-D3) = -0.09528986  
Lowest Frequencies = -136.7872  
21.2356 cm-1

|    |          |          |          |
|----|----------|----------|----------|
| C  | 2.78779  | -0.92617 | 1.78084  |
| C  | 3.78247  | -0.15278 | 1.00480  |
| C  | 3.81841  | -0.69936 | -0.29354 |
| C  | 2.82518  | -1.80617 | -0.35187 |
| C  | 2.30016  | -2.02013 | 0.98650  |
| Rh | 1.59928  | -0.08645 | 0.09115  |
| P  | 1.27321  | 1.68662  | -1.39827 |
| C  | 0.60386  | 1.30270  | -3.09608 |
| C  | 4.61611  | 0.96493  | 1.56175  |
| C  | 4.75786  | -0.35835 | -1.41150 |
| C  | 2.64039  | -2.71915 | -1.52500 |
| C  | 1.48076  | -3.18155 | 1.46544  |
| C  | 2.46919  | -0.67267 | 3.22272  |
| B  | -0.41240 | -0.79288 | 0.22294  |
| P  | -2.11169 | -0.05881 | -0.43465 |
| C  | -3.45127 | -1.32687 | -0.48147 |
| C  | -2.80653 | 1.41528  | 0.43790  |
| C  | 0.19240  | 3.08985  | -0.81359 |
| C  | 2.82959  | 2.62407  | -1.83223 |
| H  | 4.02404  | 1.63134  | 2.21060  |
| H  | 5.06414  | 1.57756  | 0.76409  |
| H  | 5.44423  | 0.56708  | 2.17779  |
| H  | 5.57325  | -1.10494 | -1.45371 |
| H  | 5.22508  | 0.62868  | -1.27626 |
| H  | 4.25947  | -0.38038 | -2.39434 |
| H  | 2.71544  | -2.17560 | -2.47987 |
| H  | 1.66521  | -3.22686 | -1.49240 |
| H  | 3.42914  | -3.49669 | -1.52482 |
| H  | 2.12858  | -3.92047 | 1.97126  |
| H  | 0.97304  | -3.69067 | 0.63300  |
| H  | 0.70373  | -2.86657 | 2.18016  |
| H  | 3.28094  | -1.06898 | 3.86242  |
| H  | 1.53168  | -1.16152 | 3.52608  |
| H  | 2.38842  | 0.40605  | 3.43564  |
| H  | -0.48571 | -1.95185 | -0.13667 |
| H  | -0.50547 | -0.67321 | 1.44744  |
| H  | -2.16038 | 0.38479  | -1.79930 |
| H  | 0.15662  | 3.88076  | -1.58116 |
| H  | 0.61670  | 3.50545  | 0.11389  |
| H  | -0.82528 | 2.73443  | -0.59810 |

|   |          |          |          |
|---|----------|----------|----------|
| H | 2.58459  | 3.47874  | -2.48434 |
| H | 3.53757  | 1.96597  | -2.35657 |
| H | 3.30237  | 2.99586  | -0.91031 |
| H | -0.38527 | 0.82928  | -3.01467 |
| H | 1.28436  | 0.59576  | -3.59529 |
| H | 0.52607  | 2.22261  | -3.69888 |
| C | -3.72687 | 2.26289  | -0.21743 |
| C | -4.27894 | 3.35823  | 0.46233  |
| C | -3.92273 | 3.61025  | 1.79850  |
| C | -3.01175 | 2.76714  | 2.45464  |
| C | -2.45053 | 1.67180  | 1.77857  |
| H | -4.01598 | 2.06753  | -1.25597 |
| H | -4.98983 | 4.01347  | -0.05057 |
| H | -4.35754 | 4.46384  | 2.32777  |
| H | -2.73641 | 2.96064  | 3.49620  |
| H | -1.73838 | 1.01676  | 2.29009  |
| C | -4.22986 | -1.51066 | -1.64223 |
| C | -5.24397 | -2.48130 | -1.65740 |
| C | -5.48529 | -3.26430 | -0.51735 |
| C | -4.70825 | -3.08330 | 0.63958  |
| C | -3.68861 | -2.12096 | 0.66016  |
| H | -4.04630 | -0.90290 | -2.53516 |
| H | -5.84462 | -2.62415 | -2.56105 |
| H | -6.27806 | -4.01866 | -0.53054 |
| H | -4.89432 | -3.69556 | 1.52746  |
| H | -3.07678 | -1.99083 | 1.55891  |

11<sub>Ph</sub>

SCF Energy = -1123.48454515  
 Enthalpy 0K = -1122.946896  
 Enthalpy 298K = -1122.910014  
 Free Energy 298K = -1123.015141  
 SCF(DCM) = -1123.53030499  
 SCF(BP86-D3) = -0.09634762  
 Lowest Frequencies = 15.9414  
 23.1703 cm<sup>-1</sup>

|    |          |          |          |
|----|----------|----------|----------|
| C  | 3.28559  | 0.89952  | -0.64205 |
| C  | 2.40434  | 0.75910  | -1.80194 |
| C  | 2.34007  | -0.63952 | -2.11569 |
| C  | 3.26208  | -1.35558 | -1.21536 |
| C  | 3.88292  | -0.40902 | -0.35663 |
| Rh | 1.53923  | -0.30711 | -0.03828 |
| P  | 1.28555  | 0.11380  | 2.22629  |
| C  | 0.38799  | -1.21886 | 3.18077  |
| C  | 1.79356  | 1.88554  | -2.58664 |
| C  | 1.61701  | -1.25946 | -3.27759 |
| C  | 3.56291  | -2.82494 | -1.29231 |
| C  | 5.02339  | -0.67988 | 0.58421  |
| C  | 3.75533  | 2.21375  | -0.08228 |
| B  | -0.43143 | -0.35677 | -0.49951 |
| P  | -2.13785 | -0.06251 | 0.42100  |
| C  | -2.82716 | 1.57740  | -0.05087 |
| C  | -3.41115 | -1.35019 | 0.11207  |
| C  | 2.84977  | 0.22858  | 3.23838  |
| C  | 0.43606  | 1.68938  | 2.76395  |
| H  | 2.66194  | -3.41657 | -1.51905 |
| H  | 3.99309  | -3.20399 | -0.35243 |
| H  | 4.29535  | -3.02431 | -2.09724 |
| H  | 5.98419  | -0.63779 | 0.03755  |
| H  | 4.95412  | -1.67981 | 1.04223  |
| H  | 5.08379  | 0.06326  | 1.39324  |

|   |          |          |          |
|---|----------|----------|----------|
| H | 4.12275  | 2.11699  | 0.95124  |
| H | 2.95559  | 2.97083  | -0.09351 |
| H | 4.59359  | 2.60780  | -0.68775 |
| H | 2.49895  | 2.23147  | -3.36586 |
| H | 1.56208  | 2.75136  | -1.94680 |
| H | 0.86673  | 1.57552  | -3.09276 |
| H | 2.27194  | -1.28669 | -4.16797 |
| H | 0.71428  | -0.68877 | -3.54633 |
| H | 1.30968  | -2.29522 | -3.06199 |
| H | -0.76071 | -0.37370 | -1.66898 |
| H | -2.11176 | -0.05490 | 1.85355  |
| H | 0.25775  | -0.92880 | 4.23656  |
| H | 0.98417  | -2.14332 | 3.12617  |
| H | -0.59454 | -1.42340 | 2.73166  |
| H | 2.59888  | 0.37395  | 4.30221  |
| H | 3.45751  | 1.08078  | 2.89826  |
| H | 3.43503  | -0.69638 | 3.12771  |
| H | -0.55996 | 1.77233  | 2.30362  |
| H | 1.04082  | 2.54265  | 2.41776  |
| H | 0.34186  | 1.73516  | 3.86172  |
| H | 0.16894  | -1.46683 | -0.03368 |
| C | -4.20951 | 1.83737  | 0.05378  |
| C | -4.70135 | 3.10576  | -0.28734 |
| C | -3.82264 | 4.10720  | -0.73526 |
| C | -2.44770 | 3.84380  | -0.84688 |
| C | -1.94385 | 2.57862  | -0.50655 |
| H | -4.89653 | 1.05386  | 0.38921  |
| H | -5.77326 | 3.31063  | -0.20716 |
| H | -4.21275 | 5.09401  | -1.00328 |
| H | -1.76680 | 4.62259  | -1.20424 |
| H | -0.87343 | 2.35965  | -0.59645 |
| C | -4.07477 | -1.96465 | 1.19553  |
| C | -5.03119 | -2.96257 | 0.95164  |
| C | -5.32589 | -3.34682 | -0.36630 |
| C | -4.66407 | -2.73583 | -1.44555 |
| C | -3.70410 | -1.74099 | -1.21319 |
| H | -3.85168 | -1.66531 | 2.22553  |
| H | -5.54625 | -3.43677 | 1.79262  |
| H | -6.07258 | -4.12451 | -0.55378 |
| H | -4.89451 | -3.03649 | -2.47215 |
| H | -3.18762 | -1.27092 | -2.05617 |

TS(11-11')<sub>Ph</sub>

SCF Energy = -1123.47781893  
 Enthalpy 0K = -1122.942405  
 Enthalpy 298K = -1122.905537  
 Free Energy 298K = -1123.010860  
 SCF(DCM) = -1123.52370313  
 SCF(BP86-D3) = -0.09535146  
 Lowest Frequencies = -361.2261  
 16.6121 cm<sup>-1</sup>

|    |          |          |          |
|----|----------|----------|----------|
| C  | -3.39888 | -0.55034 | -1.07498 |
| C  | -2.46649 | -0.01260 | -2.04489 |
| C  | -2.23490 | 1.37145  | -1.70637 |
| C  | -3.09448 | 1.70853  | -0.56565 |
| C  | -3.82840 | 0.54130  | -0.20083 |
| Rh | -1.49484 | 0.12767  | 0.01998  |
| P  | -1.32870 | -1.22251 | 1.89222  |
| C  | -0.65262 | -0.40046 | 3.42606  |
| C  | -1.93627 | -0.72840 | -3.25636 |
| C  | -1.44511 | 2.35778  | -2.52202 |



C -3.26736 3.08657 0.01101  
 C -4.95120 0.48495 0.79894  
 C -4.03452 -1.91208 -1.15458  
 B 0.39123 0.07954 -0.51255  
 P 2.11597 -0.09341 0.44517  
 C 3.16301 -1.41989 -0.27547  
 C 3.06115 1.48006 0.45508  
 C -2.91776 -1.92424 2.57412  
 C -0.30657 -2.77964 1.75898  
 H -2.33025 3.66335 -0.02012  
 H -3.60986 3.05164 1.05692  
 H -4.02278 3.65187 -0.56649  
 H -5.89676 0.81513 0.32934  
 H -4.77134 1.14572 1.66239  
 H -5.12208 -0.53474 1.17631  
 H -4.45791 -2.22859 -0.18894  
 H -3.31880 -2.68194 -1.48389  
 H -4.86766 -1.90397 -1.88242  
 H -2.58962 -0.54089 -4.12903  
 H -1.89801 -1.81786 -3.10130  
 H -0.92417 -0.38603 -3.52375  
 H -2.08467 2.80836 -3.30344  
 H -0.59368 1.87709 -3.02908  
 H -1.05103 3.17813 -1.90199  
 H 0.74333 0.37224 -1.64081  
 H 2.03418 -0.38352 1.84578  
 H -0.59102 -1.11340 4.26478  
 H -1.32266 0.43061 3.69597  
 H 0.34467 0.01948 3.22723  
 H -2.70198 -2.52876 3.47057  
 H -3.40339 -2.56344 1.82166  
 H -3.60000 -1.10622 2.84872  
 H 0.73605 -2.53444 1.50592  
 H -0.71896 -3.39478 0.94403  
 H -0.32807 -3.35207 2.70126  
 H -0.50016 1.14402 0.77304  
 C 4.54609 -1.47069 0.00126  
 C 5.32124 -2.50573 -0.54024  
 C 4.72433 -3.48180 -1.35734  
 C 3.34959 -3.42632 -1.63813  
 C 2.56338 -2.39586 -1.09953  
 H 5.01487 -0.70345 0.62594  
 H 6.39355 -2.54826 -0.32666  
 H 5.33502 -4.28548 -1.78020  
 H 2.88827 -4.18244 -2.28068  
 H 1.49140 -2.34820 -1.32195  
 C 3.28526 2.16643 1.66748  
 C 3.96176 3.39599 1.65464  
 C 4.41229 3.93894 0.44054  
 C 4.18894 3.25454 -0.76690  
 C 3.51037 2.02777 -0.76704  
 H 2.94193 1.74386 2.61788  
 H 4.14060 3.92552 2.59534  
 H 4.94176 4.89658 0.43474  
 H 4.54436 3.67662 -1.71180  
 H 3.34024 1.49660 -1.70917

11<sup>1</sup>Ph  
 SCF Energy = -1123.47907794  
 Enthalpy 0K = -1122.941990  
 Enthalpy 298K = -1122.904877

Free Energy 298K = -1123.011773  
 SCF(DCM) = -1123.52485086  
 SCF(BP86-D3) = -0.09603834  
 Lowest Frequencies = 9.3909  
 21.8762 cm-1

C -3.49613 -1.23696 1.69994  
 C -3.29353 -1.24156 0.30145  
 C -3.99379 -2.15831 -0.51331  
 C -4.89312 -3.06313 0.07075  
 C -5.09703 -3.05502 1.46054  
 C -4.40156 -2.14255 2.27197  
 P -2.09727 -0.07328 -0.44872  
 C -2.86915 1.59438 -0.60857  
 C -4.21020 1.81100 -0.23439  
 C -4.76389 3.09438 -0.36567  
 C -3.98778 4.15156 -0.86741  
 C -2.65009 3.93215 -1.23776  
 C -2.08167 2.65670 -1.10489  
 B -0.37698 0.03080 0.53048  
 Rh 1.48168 0.06412 -0.07656  
 P 1.31759 -1.69235 -1.56375  
 C 0.28787 -3.16844 -1.06649  
 C 3.33423 -0.44223 1.26617  
 C 2.36958 0.29591 2.04520  
 C 2.20128 1.59350 1.42333  
 C 3.12034 1.66672 0.28686  
 C 3.82826 0.42752 0.20244  
 C 3.91126 -1.78018 1.64440  
 C 1.76326 -0.13915 3.34994  
 C 1.43133 2.75155 1.99869  
 C 3.37932 2.89385 -0.54433  
 C 4.99509 0.14323 -0.70488  
 C 0.66341 -1.28317 -3.26144  
 C 2.92581 -2.52354 -2.00941  
 H 2.47454 3.51107 -0.65446  
 H 3.73850 2.63573 -1.55263  
 H 4.15328 3.52359 -0.06706  
 H 5.92802 0.54488 -0.26688  
 H 4.87505 0.61218 -1.69503  
 H 5.15240 -0.93586 -0.85456  
 H 4.35116 -2.30187 0.77958  
 H 3.15503 -2.44245 2.09460  
 H 4.72137 -1.65312 2.38677  
 H 2.37915 0.21632 4.19696  
 H 1.69671 -1.23585 3.42563  
 H 0.75038 0.27213 3.48788  
 H 2.06250 3.31358 2.71216  
 H 0.53547 2.41527 2.54344  
 H 1.10891 3.45672 1.21693  
 H -0.70671 0.26011 1.67909  
 H -2.00880 -0.56508 -1.79049  
 H 0.62269 -2.18543 -3.89353  
 H 1.33000 -0.53846 -3.72326  
 H -0.34214 -0.84230 -3.18931  
 H 2.74407 -3.33347 -2.73509  
 H 3.38788 -2.94611 -1.10472  
 H 3.61123 -1.78546 -2.45175  
 H -0.76052 -2.86727 -0.91412  
 H 0.67151 -3.56578 -0.11389  
 H 0.33209 -3.95540 -1.83798  
 H 0.82582 0.88769 -1.25374

H -4.81766 0.98769 0.15306  
H -5.80567 3.26478 -0.07750  
H -4.42544 5.14937 -0.96940  
H -2.04542 4.75629 -1.62872  
H -1.03596 2.48746 -1.38387  
H -3.84381 -2.16332 -1.59834  
H -5.43609 -3.77195 -0.56171  
H -5.79997 -3.76135 1.91272  
H -4.56112 -2.13701 3.35446  
H -2.95261 -0.53146 2.33606

TS(11''-9')<sub>1Ph</sub>

SCF Energy = -1123.47292465  
Enthalpy 0K = -1122.934918  
Enthalpy 298K = -1122.898617  
Free Energy 298K = -1123.002166  
SCF(DCM) = -1123.52131614  
SCF(BP86-D3) = -0.10016299  
Lowest Frequencies = -10.2344  
18.4428 cm<sup>-1</sup>

C -1.83500 2.06184 -0.34159  
C -1.94360 1.73955 1.04336  
C -2.96166 0.68716 1.13900  
C -3.61641 0.55175 -0.18887  
C -2.89733 1.35131 -1.09579  
Rh -1.38207 -0.14829 -0.01601  
P -1.53396 -2.46339 -0.24187  
C -0.03266 -3.33472 -0.92548  
C -1.25695 2.41484 2.19351  
C -3.48966 0.11857 2.42083  
C -4.87446 -0.22476 -0.44956  
C -3.16170 1.54018 -2.56114  
C -0.92933 3.09245 -0.94562  
B 0.34439 -0.55956 1.20518  
P 1.75796 -0.12063 -0.10683  
C 2.36540 1.62122 -0.10319  
C 3.24798 -1.22020 -0.05221  
C -1.90069 -3.41228 1.31566  
C -2.85337 -3.07861 -1.41072  
H -4.94783 -1.12292 0.18445  
H -4.96227 -0.53482 -1.50248  
H -5.75716 0.39995 -0.21635  
H -3.63327 2.52283 -2.74999  
H -3.83748 0.76739 -2.95814  
H -2.23016 1.51373 -3.15104  
H -0.60826 2.81251 -1.96209  
H -0.03139 3.26012 -0.33308  
H -1.46540 4.05713 -1.03196  
H -1.86469 3.26922 2.54576  
H -0.26649 2.80081 1.90697  
H -1.11480 1.72900 3.04226  
H -4.25181 0.79877 2.84904  
H -2.68942 -0.00202 3.16647  
H -3.97429 -0.85835 2.26893  
H 0.48616 0.23214 2.11576  
H 1.40335 -0.25940 -1.49358  
H -0.22323 -4.41909 -0.97867  
H 0.83766 -3.14915 -0.27963  
H 0.17801 -2.96093 -1.94004  
H -1.93649 -4.49441 1.10888  
H -2.87189 -3.08902 1.72184

H -1.11544 -3.19490 2.05462  
H -2.67646 -2.66049 -2.41385  
H -3.84672 -2.75741 -1.06554  
H -2.83067 -4.17965 -1.46664  
H 0.58273 -1.70920 1.52644  
C 2.55532 2.28230 1.12887  
C 3.06462 3.59046 1.14856  
C 3.38137 4.24285 -0.05490  
C 3.19361 3.58594 -1.28258  
C 2.68939 2.27643 -1.30995  
H 2.30580 1.77491 2.06629  
H 3.21593 4.09894 2.10587  
H 3.77707 5.26303 -0.03619  
H 3.44165 4.09201 -2.22079  
H 2.54936 1.76897 -2.27077  
C 4.04367 -1.41581 -1.20084  
C 5.19465 -2.21311 -1.12250  
C 5.55463 -2.81219 0.09705  
C 4.76152 -2.61923 1.23967  
C 3.60383 -1.82809 1.16883  
H 3.77111 -0.94805 -2.15334  
H 5.80999 -2.36745 -2.01434  
H 6.45378 -3.43348 0.15459  
H 5.04027 -3.08829 2.18837  
H 2.97528 -1.68851 2.05441

INT(11''-9')<sub>Ph</sub>

SCF Energy = -1123.50850409  
Enthalpy 0K = -1122.969860  
Enthalpy 298K = -1122.933265  
Free Energy 298K = -1123.034725  
SCF(DCM) = -1123.55480898  
SCF(BP86-D3) = -0.11171788  
Lowest Frequencies = 24.8318  
34.1598 cm<sup>-1</sup>

C -1.43236 -2.24730 -0.33969  
C -2.59032 -1.48030 -0.72143  
C -3.10439 -0.83677 0.47872  
C -2.24187 -1.17911 1.58748  
C -1.19224 -2.04226 1.08333  
Rh -0.97094 -0.01389 0.08037  
P -1.64172 2.16788 -0.44188  
C -0.37212 3.48981 -0.74235  
C -3.27676 -1.53371 -2.05779  
C -4.44322 -0.16428 0.59232  
C -2.48684 -0.84645 3.03451  
C -0.19731 -2.79610 1.91908  
C -0.72620 -3.24728 -1.20407  
B 0.15800 0.20928 -2.07665  
P 1.29673 0.11583 -0.58946  
C 2.38733 -1.34766 -0.34608  
C 2.28557 1.56410 -0.02205  
C -2.77711 2.34911 -1.90448  
C -2.61201 2.94605 0.94521  
H -2.98663 0.12660 3.15701  
H -1.54862 -0.81764 3.60889  
H -3.13559 -1.61373 3.49604  
H -0.61387 -3.78020 2.20461  
H 0.04436 -2.25791 2.84862  
H 0.74339 -2.97747 1.37807  
H 0.33353 -3.35863 -0.93073

H -0.78418 -2.98254 -2.27061  
H -1.20586 -4.23659 -1.08058  
H -3.93925 -2.41775 -2.11295  
H -2.55250 -1.60805 -2.88330  
H -3.90255 -0.64600 -2.23652  
H -5.23384 -0.93642 0.63954  
H -4.67730 0.47466 -0.27367  
H -4.52973 0.43907 1.50866  
H -0.06872 -0.81318 -2.66564  
H -0.35199 0.78824 1.28663  
H -0.89814 4.44069 -0.92745  
H 0.25191 3.24104 -1.61107  
H 0.27259 3.58996 0.14276  
H -3.09426 3.39994 -2.00613  
H -3.66631 1.71606 -1.76892  
H -2.24664 2.02979 -2.81328  
H -1.97005 3.00515 1.83738  
H -3.49638 2.33870 1.18212  
H -2.93598 3.96008 0.65890  
H -0.00566 1.27112 -2.61284  
C 3.05528 -1.55290 0.88190  
C 3.93892 -2.63222 1.02820  
C 4.16322 -3.51222 -0.04494  
C 3.50787 -3.30739 -1.26995  
C 2.62343 -2.22768 -1.42600  
H 2.90026 -0.86061 1.71553  
H 4.45768 -2.78289 1.98010  
H 4.85773 -4.35000 0.07082  
H 3.69453 -3.97984 -2.11314  
H 2.13172 -2.05338 -2.38768  
C 3.14732 2.18339 -0.95354  
C 3.96021 3.25484 -0.55114  
C 3.92533 3.70726 0.77817  
C 3.07547 3.08769 1.70991  
C 2.25548 2.01896 1.31290  
H 3.17971 1.83100 -1.98968  
H 4.62136 3.73575 -1.27876  
H 4.56102 4.54221 1.08878  
H 3.05009 3.43601 2.74737  
H 1.58555 1.54415 2.03845

TS (11''-6)<sub>2Ph</sub>

SCF Energy = -1123.48721559  
Enthalpy 0K = -1122.949114  
Enthalpy 298K = -1122.913062  
Free Energy 298K = -1123.013258  
SCF(DCM) = -1123.53355311  
SCF(BP86-D3) = -0.10874758  
Lowest Frequencies = -24.9793  
22.0761 cm<sup>-1</sup>  
C -2.31699 1.39393 1.45155  
C -2.58986 -0.02546 1.69857  
C -3.14023 -0.57438 0.49836  
C -3.19733 0.48539 -0.51489  
C -2.67445 1.69340 0.08807  
Rh -1.01509 0.13705 -0.13284  
P -0.51160 -1.61230 -1.57775  
C 1.03534 -1.42173 -2.59075  
C -2.58531 -0.70367 3.04122  
C -3.77015 -1.93511 0.38530  
C -3.97484 0.44684 -1.80252

C -2.70364 3.06841 -0.52318  
C -2.12933 2.45057 2.50709  
B 0.54235 0.73681 2.28403  
P 1.23700 0.31080 0.58999  
C 2.27134 1.68641 -0.09434  
C 2.37132 -1.15723 0.70990  
C -0.34813 -3.32076 -0.85715  
C -1.75231 -1.90023 -2.93874  
H -4.11546 -0.57619 -2.17918  
H -3.49115 1.04154 -2.59346  
H -4.98210 0.87406 -1.64047  
H -3.63971 3.58948 -0.24779  
H -2.65812 3.02601 -1.62185  
H -1.86380 3.68803 -0.17343  
H -1.47752 3.27081 2.17042  
H -1.72320 2.04936 3.44574  
H -3.12030 2.89138 2.73056  
H -3.58297 -0.61487 3.51186  
H -1.85369 -0.25713 3.72985  
H -2.35972 -1.77878 2.95925  
H -4.82004 -1.89059 0.73058  
H -3.25486 -2.68075 1.01120  
H -3.79234 -2.30710 -0.65025  
H 0.39648 1.89267 2.54462  
H -0.44900 0.96911 -1.33087  
H 1.12551 -2.27460 -3.28292  
H 1.92113 -1.39212 -1.94084  
H 0.97406 -0.48688 -3.16843  
H -0.18537 -4.05356 -1.66498  
H -1.26931 -3.57890 -0.31307  
H 0.50239 -3.34734 -0.15996  
H -1.93557 -0.96515 -3.48809  
H -2.70185 -2.27124 -2.52670  
H -1.35119 -2.65762 -3.63209  
H 0.30904 -0.14566 3.05991  
C 2.02039 2.27827 -1.34726  
C 2.82989 3.32986 -1.80812  
C 3.89354 3.79693 -1.02071  
C 4.14966 3.21137 0.23084  
C 3.34553 2.16016 0.69445  
H 1.18113 1.92724 -1.95713  
H 2.62538 3.78476 -2.78245  
H 4.52098 4.61879 -1.37931  
H 4.97395 3.57642 0.85136  
H 3.55333 1.70837 1.67018  
C 2.02443 -2.23614 1.55344  
C 2.89134 -3.33086 1.69017  
C 4.10752 -3.36339 0.98537  
C 4.45611 -2.29350 0.14711  
C 3.59450 -1.19179 0.00782  
H 1.08527 -2.21060 2.11569  
H 2.62028 -4.15564 2.35700  
H 4.78353 -4.21647 1.09771  
H 5.40501 -2.30767 -0.39823  
H 3.88609 -0.35152 -0.62994

INT (11''-6)<sub>2Ph</sub>

SCF Energy = -1123.49039441  
Enthalpy 0K = -1122.951797  
Enthalpy 298K = -1122.915172  
Free Energy 298K = -1123.034725

SCF(DCM) = -1123.53758248  
SCF(BP86-D3) = -0.11169754  
Lowest Frequencies = 14.7821  
30.1235 cm<sup>-1</sup>

|    |          |          |          |
|----|----------|----------|----------|
| C  | -2.44621 | -0.46129 | -1.84237 |
| C  | -2.51807 | 0.90513  | -1.30811 |
| C  | -3.00839 | 0.82792  | 0.02792  |
| C  | -3.21033 | -0.58835 | 0.36805  |
| C  | -2.84671 | -1.37013 | -0.78770 |
| Rh | -0.98844 | -0.36590 | 0.05052  |
| P  | -0.27831 | 0.34243  | 2.15208  |
| C  | 1.27933  | -0.40890 | 2.83044  |
| C  | -2.33905 | 2.15680  | -2.11910 |
| C  | -3.45211 | 1.99799  | 0.86156  |
| C  | -3.98665 | -1.12108 | 1.54141  |
| C  | -3.05703 | -2.85033 | -0.95716 |
| C  | -2.50181 | -0.82703 | -3.30375 |
| B  | 0.27669  | -0.53739 | -2.30011 |
| P  | 1.24213  | -0.15948 | -0.73873 |
| C  | 2.50756  | -1.45537 | -0.35678 |
| C  | 2.06684  | 1.49241  | -0.62432 |
| C  | 0.02380  | 2.17008  | 2.31658  |
| C  | -1.43975 | -0.00508 | 3.56657  |
| H  | -3.99966 | -0.42412 | 2.39088  |
| H  | -3.59457 | -2.08801 | 1.89356  |
| H  | -5.03878 | -1.28502 | 1.24224  |
| H  | -4.04974 | -3.04686 | -1.40393 |
| H  | -3.01542 | -3.38017 | 0.00648  |
| H  | -2.29957 | -3.29378 | -1.62150 |
| H  | -2.04399 | -1.80481 | -3.51213 |
| H  | -2.02394 | -0.07846 | -3.94989 |
| H  | -3.56848 | -0.89282 | -3.59467 |
| H  | -3.28113 | 2.41778  | -2.63731 |
| H  | -1.56803 | 2.03140  | -2.89558 |
| H  | -2.05906 | 3.01843  | -1.49311 |
| H  | -4.52012 | 2.21022  | 0.66760  |
| H  | -2.89039 | 2.91314  | 0.61769  |
| H  | -3.35776 | 1.81098  | 1.94249  |
| H  | 0.22413  | -1.68837 | -2.62630 |
| H  | -0.47661 | -1.76066 | 0.54017  |
| H  | 1.47247  | 0.00489  | 3.83351  |
| H  | 2.13570  | -0.19411 | 2.17733  |
| H  | 1.15815  | -1.50002 | 2.89993  |
| H  | 0.31704  | 2.41347  | 3.35136  |
| H  | -0.89398 | 2.71986  | 2.05953  |
| H  | 0.82540  | 2.46691  | 1.62440  |
| H  | -1.66756 | -1.08070 | 3.60578  |
| H  | -2.37670 | 0.55716  | 3.44951  |
| H  | -0.95954 | 0.30148  | 4.51048  |
| H  | -0.05612 | 0.37174  | -3.00342 |
| C  | 2.17040  | -2.66461 | 0.28456  |
| C  | 3.13212  | -3.67505 | 0.44072  |
| C  | 4.43823  | -3.48808 | -0.03828 |
| C  | 4.77834  | -2.28975 | -0.68663 |
| C  | 3.82080  | -1.27791 | -0.85208 |
| H  | 1.15020  | -2.82155 | 0.65001  |
| H  | 2.85717  | -4.61037 | 0.93840  |
| H  | 5.18741  | -4.27573 | 0.08766  |
| H  | 5.79060  | -2.14121 | -1.07527 |
| H  | 4.09537  | -0.35735 | -1.37608 |
| C  | 1.54696  | 2.56601  | -1.38160 |

|   |         |         |          |
|---|---------|---------|----------|
| C | 2.11207 | 3.84510 | -1.27622 |
| C | 3.19947 | 4.07064 | -0.41476 |
| C | 3.72410 | 3.00786 | 0.33764  |
| C | 3.16177 | 1.72444 | 0.23796  |
| H | 0.70828 | 2.39659 | -2.06260 |
| H | 1.70865 | 4.66588 | -1.87767 |
| H | 3.64135 | 5.06873 | -0.33767 |
| H | 4.57751 | 3.17268 | 1.00290  |
| H | 3.59670 | 0.90230 | 0.81484  |

TS(11''-6)2'<sub>Ph</sub>

SCF Energy = -1123.49032984  
Enthalpy 0K = -1122.951789  
Enthalpy 298K = -1122.916032  
Free Energy 298K = -1123.014828  
SCF(DCM) = -1123.53754405  
SCF(BP86-D3) = -0.11140946  
Lowest Frequencies = -36.7240  
29.9921 cm<sup>-1</sup>

|    |          |          |          |
|----|----------|----------|----------|
| C  | -2.44452 | -0.35214 | -1.86132 |
| C  | -2.49981 | 0.98989  | -1.26464 |
| C  | -2.99806 | 0.85922  | 0.06345  |
| C  | -3.22083 | -0.56842 | 0.33754  |
| C  | -2.86334 | -1.30206 | -0.85052 |
| Rh | -0.99051 | -0.36723 | 0.03600  |
| P  | -0.28374 | 0.20377  | 2.17680  |
| C  | 1.26016  | -0.60769 | 2.81881  |
| C  | -2.29745 | 2.27438  | -2.01665 |
| C  | -3.42333 | 1.99589  | 0.95112  |
| C  | -4.00995 | -1.14318 | 1.48249  |
| C  | -3.09867 | -2.76872 | -1.08939 |
| C  | -2.50716 | -0.64882 | -3.33811 |
| B  | 0.26639  | -0.45826 | -2.30764 |
| P  | 1.24211  | -0.12891 | -0.74144 |
| C  | 2.50692  | -1.43747 | -0.40204 |
| C  | 2.07049  | 1.51641  | -0.57929 |
| C  | 0.03893  | 2.01462  | 2.45164  |
| C  | -1.45613 | -0.21172 | 3.56325  |
| H  | -4.02914 | -0.47929 | 2.35813  |
| H  | -3.62422 | -2.12434 | 1.80070  |
| H  | -5.05966 | -1.29176 | 1.16728  |
| H  | -4.09523 | -2.92581 | -1.54312 |
| H  | -3.06503 | -3.34399 | -0.15192 |
| H  | -2.35031 | -3.19306 | -1.77606 |
| H  | -2.05545 | -1.61816 | -3.59387 |
| H  | -2.02734 | 0.12703  | -3.94955 |
| H  | -3.57520 | -0.69441 | -3.62787 |
| H  | -3.22948 | 2.56570  | -2.53689 |
| H  | -1.51566 | 2.17644  | -2.78638 |
| H  | -2.02021 | 3.10550  | -1.34945 |
| H  | -4.48381 | 2.24404  | 0.75861  |
| H  | -2.83670 | 2.90796  | 0.75978  |
| H  | -3.34483 | 1.75196  | 2.02210  |
| H  | 0.21356  | -1.59723 | -2.67387 |
| H  | -0.48642 | -1.79067 | 0.44394  |
| H  | 1.45145  | -0.25443 | 3.84506  |
| H  | 2.12529  | -0.37170 | 2.18475  |
| H  | 1.12199  | -1.69922 | 2.82491  |
| H  | 0.36064  | 2.18885  | 3.49175  |
| H  | -0.88119 | 2.58488  | 2.25611  |
| H  | 0.82347  | 2.35117  | 1.75805  |

H -1.70711 -1.28235 3.53045  
H -2.38023 0.37715 3.48059  
H -0.97313 0.02180 4.52633  
H -0.06270 0.47398 -2.98140  
C 2.15033 -2.69485 0.12747  
C 3.11067 -3.71123 0.24647  
C 4.43573 -3.48296 -0.15715  
C 4.79568 -2.23633 -0.69350  
C 3.83950 -1.21761 -0.82227  
H 1.11646 -2.88295 0.43552  
H 2.82005 -4.68357 0.65661  
H 5.18389 -4.27560 -0.05977  
H 5.82309 -2.05414 -1.02366  
H 4.13103 -0.25894 -1.26141  
C 1.60918 2.59520 -1.36609  
C 2.18124 3.86807 -1.22587  
C 3.21820 4.08103 -0.30166  
C 3.68561 3.01255 0.48025  
C 3.11466 1.73638 0.34722  
H 0.81359 2.43312 -2.09834  
H 1.82425 4.69318 -1.85028  
H 3.66674 5.07380 -0.19860  
H 4.50069 3.16777 1.19413  
H 3.50400 0.90860 0.94817

$6_{Ph}$   
SCF Energy = -1123.51904626  
Enthalpy 0K = -1122.980163  
Enthalpy 298K = -1122.943569  
Free Energy 298K = -1123.045502  
SCF(DCM) = -1123.56689731  
SCF(BP86-D3) = -0.11101529  
Lowest Frequencies = 23.6461  
30.8301 cm<sup>-1</sup>

C 2.58425 -0.52417 1.33394  
C 3.24014 -0.75851 0.04783  
C 2.50469 -1.80124 -0.62528  
C 1.41871 -2.23123 0.23182  
C 1.46599 -1.43479 1.44917  
Rh 1.09937 -0.03138 -0.28805  
P 1.30467 2.31552 -0.17875  
C 0.38032 3.31632 -1.44093  
C 4.57213 -0.21783 -0.39198  
C 2.85184 -2.41572 -1.95022  
C 0.56965 -3.44542 0.00024  
C 0.63336 -1.66616 2.67801  
C 3.12414 0.32680 2.44857  
B -0.33315 -0.01719 -2.31518  
P -1.24674 -0.03117 -0.62327  
C -2.35366 1.38055 -0.18007  
C -2.23697 -1.53799 -0.22606  
C 0.84707 3.13633 1.42691  
C 3.03770 2.94526 -0.45497  
H 0.32025 -3.57646 -1.06375  
H -0.37081 -3.41249 0.56808  
H 1.12617 -4.34583 0.32245  
H 1.11115 -2.43056 3.31938  
H -0.37308 -2.03218 2.42287  
H 0.52584 -0.75068 3.27992  
H 2.33309 0.64919 3.14314  
H 3.64862 1.22093 2.07819

H 3.85729 -0.25637 3.03640  
H 5.36890 -0.94674 -0.15273  
H 4.83166 0.72146 0.11687  
H 4.60802 -0.04063 -1.47826  
H 3.43047 -3.34500 -1.79447  
H 3.46315 -1.74040 -2.56738  
H 1.94815 -2.67821 -2.52200  
H -0.49546 0.98619 -2.96596  
H 0.98940 0.22980 -1.98071  
H 0.60122 4.38420 -1.28116  
H -0.70214 3.14836 -1.35090  
H 0.70374 3.01873 -2.44947  
H 1.09792 4.20940 1.38777  
H 1.39640 2.66539 2.25579  
H -0.23380 3.02013 1.59447  
H 3.42263 2.57235 -1.41607  
H 3.70402 2.61143 0.35359  
H 3.02588 4.04751 -0.47081  
H -0.30092 -1.08225 -2.88298  
C -2.80924 -1.72043 1.05373  
C -3.58986 -2.85476 1.32258  
C -3.81033 -3.81405 0.31914  
C -3.25392 -3.63206 -0.95703  
C -2.46892 -2.50091 -1.23272  
H -2.66942 -0.96714 1.83521  
H -4.03355 -2.98475 2.31475  
H -4.42456 -4.69502 0.52953  
H -3.43813 -4.36701 -1.74702  
H -2.04645 -2.35560 -2.23076  
C -2.52297 1.79498 1.15936  
C -3.43099 2.81939 1.47232  
C -4.17023 3.44088 0.45183  
C -4.00472 3.03425 -0.88224  
C -3.10312 2.00563 -1.20148  
H -1.94818 1.31518 1.95920  
H -3.56161 3.13154 2.51342  
H -4.87675 4.23976 0.69713  
H -4.58255 3.51327 -1.67891  
H -2.98178 1.68464 -2.24103

TS(11''-6)<sub>3Ph</sub>  
SCF Energy = -1123.44407230  
Enthalpy 0K = -1122.910165  
Enthalpy 298K = -1122.873453  
Free Energy 298K = -1122.978181  
SCF(DCM) = -1123.49127509  
SCF(BP86-D3) = -0.10081643  
Lowest Frequencies = -756.0128  
12.3439 cm<sup>-1</sup>

C -3.03474 0.79533 -0.66094  
C -2.06943 1.75121 -0.12837  
C -2.05785 1.58557 1.30914  
C -3.07670 0.59198 1.65631  
C -3.70041 0.13529 0.45727  
Rh -1.34214 -0.30859 0.31412  
P -1.21101 -2.18683 -1.10696  
C 0.05837 -3.44698 -0.59680  
C -1.36435 2.81796 -0.91281  
C -1.34600 2.47075 2.29426  
C -3.44597 0.19087 3.05452  
C -4.90091 -0.76607 0.37898

C -3.47593 0.73441 -2.09783  
 B 0.44373 -0.16291 1.42371  
 P 1.79285 -0.23936 0.02368  
 C 2.13728 1.52354 -0.42117  
 C 3.46702 -0.97459 0.39790  
 C -2.75278 -3.23043 -1.20777  
 C -0.81502 -1.89513 -2.90326  
 H -2.57586 0.21253 3.72904  
 H -3.88464 -0.81851 3.08867  
 H -4.19620 0.89155 3.46686  
 H -5.82280 -0.19393 0.59319  
 H -4.85234 -1.58826 1.11117  
 H -5.02396 -1.20634 -0.62187  
 H -3.86122 -0.26010 -2.37482  
 H -2.65860 0.99494 -2.78805  
 H -4.29467 1.45752 -2.27201  
 H -2.02327 3.70102 -1.02104  
 H -1.10207 2.47439 -1.92500  
 H -0.43703 3.14684 -0.42144  
 H -1.99249 3.32599 2.56588  
 H -0.41060 2.87437 1.87726  
 H -1.09747 1.93531 3.22343  
 H 0.61864 0.29572 2.52280  
 H 0.38349 -0.46475 -0.75900  
 H 0.09259 -4.26935 -1.32940  
 H -0.20975 -3.84718 0.39315  
 H 1.05288 -2.97698 -0.53628  
 H -2.55738 -4.12878 -1.81655  
 H -3.57009 -2.65806 -1.67139  
 H -3.05947 -3.53510 -0.19569  
 H 0.19026 -1.45384 -2.98375  
 H -1.54688 -1.19267 -3.32947  
 H -0.84615 -2.84163 -3.46720  
 H -0.41760 -1.20940 1.47279  
 C 4.60423 -0.65465 -0.37477  
 C 5.82597 -1.29031 -0.11052  
 C 5.91892 -2.24780 0.91485  
 C 4.78671 -2.57221 1.68052  
 C 3.55902 -1.94521 1.41849  
 H 4.53967 0.09886 -1.16685  
 H 6.70979 -1.03411 -0.70344  
 H 6.87527 -2.73951 1.11805  
 H 4.85945 -3.31159 2.48448  
 H 2.67769 -2.19781 2.02052  
 C 2.03889 1.93490 -1.76727  
 C 2.34748 3.25812 -2.12530  
 C 2.74769 4.17722 -1.14185  
 C 2.84745 3.77264 0.20091  
 C 2.54841 2.44985 0.56333  
 H 1.72941 1.21840 -2.53572  
 H 2.27963 3.56828 -3.17291  
 H 2.98861 5.20758 -1.42156  
 H 3.16612 4.48645 0.96718  
 H 2.64292 2.13449 1.60753

INT(11''-6)<sub>Ph</sub>  
 SCF Energy = -1123.48729045  
 Enthalpy 0K = -1122.950591  
 Enthalpy 298K = -1122.913553  
 Free Energy 298K = -1123.019632  
 SCF(DCM) = -1123.53663207

SCF(BP86-D3) = -0.09817888  
 Lowest Frequencies = 12.8542  
 16.3030 cm<sup>-1</sup>

C -3.43564 -0.24416 1.09146  
 C -2.53579 -1.19506 1.70524  
 C -2.25145 -2.24174 0.73652  
 C -3.00932 -1.95396 -0.46382  
 C -3.73483 -0.72071 -0.25990  
 Rh -1.52322 -0.25037 -0.08045  
 P -1.37954 1.97441 -0.82017  
 C -0.34544 2.21863 -2.34451  
 C -2.05731 -1.16251 3.12743  
 C -1.44954 -3.48420 0.99133  
 C -3.08295 -2.82368 -1.68433  
 C -4.80507 -0.19068 -1.17197  
 C -4.12929 0.87889 1.81245  
 B 0.57162 -0.86578 -0.32168  
 P 2.25186 -0.13041 -0.87667  
 C 2.70353 1.44596 -0.01172  
 C 3.58489 -1.34507 -0.47803  
 C -2.96331 2.80277 -1.33804  
 C -0.68727 3.18042 0.41107  
 H -2.14844 -3.38217 -1.84610  
 H -3.29639 -2.23827 -2.59173  
 H -3.89517 -3.56582 -1.56902  
 H -5.73897 -0.76277 -1.01671  
 H -4.53505 -0.29300 -2.23514  
 H -5.03708 0.86545 -0.97361  
 H -4.49203 1.65620 1.12300  
 H -3.47412 1.35745 2.55707  
 H -5.01237 0.49007 2.35302  
 H -2.78269 -1.68854 3.77649  
 H -1.96286 -0.13316 3.50599  
 H -1.08546 -1.66502 3.24488  
 H -2.10341 -4.28261 1.38780  
 H -0.64797 -3.31321 1.72623  
 H -0.98174 -3.86360 0.06984  
 H 0.67232 -2.05495 -0.15832  
 H 0.05907 -0.05588 0.64220  
 H -0.29966 3.28941 -2.60217  
 H -0.80152 1.65864 -3.17582  
 H 0.67343 1.83598 -2.18174  
 H -2.73477 3.81802 -1.70237  
 H -3.65854 2.88125 -0.48920  
 H -3.43770 2.22869 -2.14746  
 H 0.33139 2.87522 0.69394  
 H -1.32333 3.17931 1.30990  
 H -0.66427 4.19485 -0.02015  
 H -0.39278 -0.63797 -1.31580  
 C 4.73975 -0.98526 0.24943  
 C 5.74872 -1.93356 0.47860  
 C 5.62191 -3.24087 -0.01746  
 C 4.48018 -3.59896 -0.75467  
 C 3.47130 -2.65619 -0.99468  
 H 4.84962 0.02974 0.64221  
 H 6.63771 -1.64620 1.04930  
 H 6.41307 -3.97559 0.16114  
 H 4.38010 -4.61277 -1.15550  
 H 2.59593 -2.93865 -1.58988  
 C 3.24062 2.51160 -0.76781  
 C 3.62025 3.70981 -0.13997

|   |         |         |          |
|---|---------|---------|----------|
| C | 3.47380 | 3.85344 | 1.24910  |
| C | 2.95103 | 2.79528 | 2.01313  |
| C | 2.56580 | 1.59752 | 1.38909  |
| H | 3.36976 | 2.39776 | -1.84957 |
| H | 4.03775 | 4.52734 | -0.73625 |
| H | 3.77556 | 4.78478 | 1.73866  |
| H | 2.85032 | 2.89913 | 3.09853  |
| H | 2.17485 | 0.76994 | 1.98994  |

TS(11''-6)<sub>4Ph</sub>

SCF Energy = -1123.46265178  
 Enthalpy 0K = -1122.926683  
 Enthalpy 298K = -1122.889835  
 Free Energy 298K = -1122.994440  
 SCF(DCM) = -1123.51128011  
 SCF(BP86-D3) = -0.09664338  
 Lowest Frequencies = -120.8580  
 16.6725 cm<sup>-1</sup>

|    |          |          |          |
|----|----------|----------|----------|
| C  | -3.42426 | 0.60756  | 0.56389  |
| C  | -3.66624 | -0.53032 | -0.33083 |
| C  | -3.19039 | -0.16494 | -1.65725 |
| C  | -2.64902 | 1.16818  | -1.58412 |
| C  | -2.79880 | 1.64563  | -0.21280 |
| Rh | -1.47927 | -0.21879 | -0.19574 |
| P  | -0.79632 | -1.58665 | 1.58648  |
| C  | 0.42346  | -2.94121 | 1.21077  |
| C  | -4.49476 | -1.74318 | -0.02666 |
| C  | -3.31545 | -0.99949 | -2.89767 |
| C  | -2.14732 | 1.97712  | -2.74449 |
| C  | -2.41434 | 3.00914  | 0.27736  |
| C  | -3.94076 | 0.76215  | 1.96801  |
| B  | 0.50262  | -0.15101 | -1.55467 |
| P  | 1.94252  | -0.00690 | -0.32358 |
| C  | 3.44447  | -1.01583 | -0.56468 |
| C  | 2.40955  | 1.69562  | 0.17910  |
| C  | -0.04450 | -0.68881 | 3.03515  |
| C  | -2.13189 | -2.58356 | 2.42445  |
| H  | -1.63859 | 1.34850  | -3.49126 |
| H  | -1.44237 | 2.75989  | -2.42484 |
| H  | -2.99506 | 2.47819  | -3.24721 |
| H  | -3.22358 | 3.73266  | 0.06077  |
| H  | -1.50275 | 3.37927  | -0.21742 |
| H  | -2.24330 | 3.02007  | 1.36469  |
| H  | -3.26706 | 1.37394  | 2.58864  |
| H  | -4.08123 | -0.20750 | 2.46920  |
| H  | -4.92547 | 1.26510  | 1.95652  |
| H  | -5.52705 | -1.58586 | -0.39310 |
| H  | -4.55991 | -1.94500 | 1.05160  |
| H  | -4.10513 | -2.64364 | -0.52804 |
| H  | -4.25387 | -0.75451 | -3.42976 |
| H  | -3.33645 | -2.07507 | -2.66461 |
| H  | -2.48325 | -0.81568 | -3.59505 |
| H  | 0.65982  | -0.60601 | -2.66331 |
| H  | -0.39486 | -1.13432 | -1.13160 |
| H  | 0.65026  | -3.50430 | 2.13058  |
| H  | 1.35465  | -2.52199 | 0.80497  |
| H  | -0.02074 | -3.62049 | 0.46661  |
| H  | 0.23667  | -1.39933 | 3.83050  |
| H  | -0.77292 | 0.03542  | 3.43260  |
| H  | 0.84237  | -0.14108 | 2.68507  |
| H  | -2.60682 | -3.25984 | 1.69795  |

|   |          |          |          |
|---|----------|----------|----------|
| H | -2.89503 | -1.91959 | 2.85564  |
| H | -1.68677 | -3.18325 | 3.23524  |
| H | 0.04404  | 0.97911  | -1.45057 |
| C | 2.92800  | 1.93675  | 1.47324  |
| C | 3.29628  | 3.23461  | 1.85887  |
| C | 3.13694  | 4.30669  | 0.96501  |
| C | 2.61717  | 4.07694  | -0.31977 |
| C | 2.25764  | 2.77979  | -0.71731 |
| H | 3.04601  | 1.10738  | 2.17917  |
| H | 3.70203  | 3.40884  | 2.86040  |
| H | 3.42239  | 5.31894  | 1.26772  |
| H | 2.50659  | 4.90810  | -1.02372 |
| H | 1.88151  | 2.60006  | -1.72860 |
| C | 4.71838  | -0.62584 | -0.08494 |
| C | 5.83023  | -1.44974 | -0.30144 |
| C | 5.68965  | -2.67228 | -0.98155 |
| C | 4.42687  | -3.06790 | -1.45645 |
| C | 3.30818  | -2.25158 | -1.24682 |
| H | 4.84120  | 0.32925  | 0.43413  |
| H | 6.81385  | -1.13333 | 0.05975  |
| H | 6.56189  | -3.31263 | -1.14441 |
| H | 4.31404  | -4.01288 | -1.99717 |
| H | 2.33138  | -2.55765 | -1.63730 |

TS(11''-9')<sub>2Ph</sub>

SCF Energy = -1123.48011730  
 Enthalpy 0K = -1122.941286  
 Enthalpy 298K = -1122.905652  
 Free Energy 298K = -1123.005054  
 SCF(DCM) = -1123.52623466  
 SCF(BP86-D3) = -0.10572648  
 Lowest Frequencies = -116.7700  
 31.4364 cm<sup>-1</sup>

|    |          |          |          |
|----|----------|----------|----------|
| C  | 1.11519  | 2.11279  | 1.04052  |
| C  | 1.94292  | 2.08342  | -0.12593 |
| C  | 3.02901  | 1.13815  | 0.12009  |
| C  | 2.86499  | 0.56348  | 1.42456  |
| C  | 1.63500  | 1.11954  | 1.99121  |
| Rh | 0.97959  | -0.02298 | 0.28788  |
| P  | 1.34901  | -2.19911 | -1.46442 |
| C  | 0.48138  | -3.73633 | -0.89293 |
| C  | 1.82863  | 2.97229  | -1.33253 |
| C  | 4.20170  | 0.96664  | -0.80275 |
| C  | 3.84663  | -0.29999 | 2.16856  |
| C  | 1.17217  | 0.95006  | 3.41072  |
| C  | 0.00492  | 3.07911  | 1.32621  |
| B  | -0.17199 | -0.79389 | -1.84455 |
| P  | -1.20307 | -0.14292 | -0.31234 |
| C  | -2.18271 | 1.36994  | -0.67835 |
| C  | -2.38641 | -1.35636 | 0.41231  |
| C  | 1.77124  | -2.52616 | -3.25492 |
| C  | 3.04954  | -2.42449 | -0.71881 |
| H  | 4.48876  | -0.88114 | 1.48938  |
| H  | 3.33779  | -1.00669 | 2.84270  |
| H  | 4.51181  | 0.32785  | 2.79010  |
| H  | 1.66559  | 1.69501  | 4.06333  |
| H  | 1.41781  | -0.04979 | 3.79952  |
| H  | 0.08504  | 1.09529  | 3.50307  |
| H  | -0.75724 | 2.64879  | 1.99370  |
| H  | -0.49796 | 3.41973  | 0.40895  |
| H  | 0.42133  | 3.97104  | 1.83120  |

|   |          |          |          |
|---|----------|----------|----------|
| H | 2.46026  | 3.87301  | -1.21678 |
| H | 0.79310  | 3.31243  | -1.48809 |
| H | 2.15813  | 2.45910  | -2.25049 |
| H | 4.80822  | 1.89162  | -0.80359 |
| H | 3.88948  | 0.79527  | -1.84688 |
| H | 4.86626  | 0.14666  | -0.49178 |
| H | 0.17288  | 0.00429  | -2.67722 |
| H | 0.71387  | -1.35932 | 1.09723  |
| H | 1.17275  | -4.59070 | -0.96124 |
| H | -0.39976 | -3.92024 | -1.52422 |
| H | 0.15615  | -3.60586 | 0.14939  |
| H | 2.36980  | -3.44755 | -3.33509 |
| H | 2.35586  | -1.68003 | -3.64885 |
| H | 0.84837  | -2.62291 | -3.84416 |
| H | 2.97396  | -2.40750 | 0.37583  |
| H | 3.71719  | -1.62246 | -1.05942 |
| H | 3.44762  | -3.39528 | -1.06152 |
| H | -0.76345 | -1.76315 | -2.26618 |
| C | -3.23436 | 1.75376  | 0.18462  |
| C | -3.95854 | 2.92857  | -0.06992 |
| C | -3.64208 | 3.72841  | -1.18045 |
| C | -2.59926 | 3.34868  | -2.04317 |
| C | -1.86970 | 2.17583  | -1.79636 |
| H | -3.49535 | 1.12960  | 1.04520  |
| H | -4.77372 | 3.21687  | 0.60118  |
| H | -4.21233 | 4.64123  | -1.37840 |
| H | -2.36214 | 3.95968  | -2.91997 |
| H | -1.07187 | 1.87300  | -2.48061 |
| C | -3.57992 | -1.66016 | -0.28138 |
| C | -4.47567 | -2.60096 | 0.24711  |
| C | -4.19423 | -3.23686 | 1.46884  |
| C | -3.01403 | -2.93045 | 2.16489  |
| C | -2.11025 | -1.99191 | 1.64005  |
| H | -3.80803 | -1.16391 | -1.23048 |
| H | -5.39551 | -2.83766 | -0.29678 |
| H | -4.89738 | -3.96858 | 1.87874  |
| H | -2.79693 | -3.41766 | 3.12081  |
| H | -1.18795 | -1.74790 | 2.17772  |

9' <sub>Ph</sub>

SCF Energy = -1123.49750371  
 Enthalpy 0K = -1122.960805  
 Enthalpy 298K = -1122.923325  
 Free Energy 298K = -1123.030752  
 SCF(DCM) = -1123.54640180  
 SCF(BP86-D3) = -0.10098690  
 Lowest Frequencies = 6.2332  
 23.0974 cm<sup>-1</sup>

|    |          |          |          |
|----|----------|----------|----------|
| C  | 2.76223  | 1.03928  | 0.19282  |
| C  | 3.21004  | 0.03429  | -0.69875 |
| C  | 3.35926  | -1.23711 | 0.05201  |
| C  | 3.00405  | -1.00853 | 1.41047  |
| C  | 2.52451  | 0.38524  | 1.49850  |
| Rh | 1.17643  | -0.61547 | 0.20574  |
| P  | -2.17593 | -2.48935 | -1.47954 |
| C  | -3.30949 | -2.74301 | -0.04364 |
| C  | 3.56078  | 0.20317  | -2.14760 |
| C  | 3.88782  | -2.50998 | -0.53997 |
| C  | 3.14430  | -1.95895 | 2.56562  |
| C  | 2.15500  | 1.09846  | 2.76159  |
| C  | 2.60779  | 2.50381  | -0.08197 |

|   |          |          |          |
|---|----------|----------|----------|
| B | -1.61433 | -0.65527 | -1.83791 |
| P | -0.86719 | 0.35938  | -0.28206 |
| C | -0.77761 | 2.12168  | -0.86720 |
| C | -2.16783 | 0.41620  | 1.04449  |
| C | -3.10216 | -3.10796 | -2.95603 |
| C | -0.78649 | -3.68717 | -1.24281 |
| H | 3.10200  | -3.00923 | 2.23907  |
| H | 2.35374  | -1.80749 | 3.31638  |
| H | 4.11674  | -1.80310 | 3.06839  |
| H | 3.06171  | 1.53768  | 3.22180  |
| H | 1.70558  | 0.41571  | 3.49864  |
| H | 1.44918  | 1.92150  | 2.57005  |
| H | 1.78631  | 2.94541  | 0.50238  |
| H | 2.39963  | 2.70275  | -1.14403 |
| H | 3.53729  | 3.03846  | 0.18898  |
| H | 4.65853  | 0.25774  | -2.27322 |
| H | 3.13017  | 1.12575  | -2.56462 |
| H | 3.21010  | -0.64683 | -2.75638 |
| H | 4.98936  | -2.46197 | -0.63280 |
| H | 3.48759  | -2.68521 | -1.55212 |
| H | 3.64437  | -3.38330 | 0.08386  |
| H | -0.78797 | -0.74631 | -2.72605 |
| H | 0.27037  | -1.59009 | 1.07640  |
| H | -3.64515 | -3.79108 | -0.00434 |
| H | -4.17927 | -2.07700 | -0.14867 |
| H | -2.78356 | -2.48172 | 0.88700  |
| H | -3.40383 | -4.15726 | -2.81291 |
| H | -2.45919 | -3.02540 | -3.84567 |
| H | -3.99538 | -2.48297 | -3.10707 |
| H | -0.18186 | -3.36190 | -0.37944 |
| H | -0.15642 | -3.68374 | -2.14610 |
| H | -1.17068 | -4.70446 | -1.06765 |
| H | -2.61724 | -0.06677 | -2.19216 |
| C | -0.97121 | 3.19169  | 0.03421  |
| C | -0.84671 | 4.51930  | -0.40647 |
| C | -0.52484 | 4.79237  | -1.74621 |
| C | -0.33024 | 3.73207  | -2.64718 |
| C | -0.45455 | 2.40263  | -2.21286 |
| H | -1.23946 | 2.98832  | 1.07628  |
| H | -1.00875 | 5.34116  | 0.29847  |
| H | -0.43440 | 5.82784  | -2.08896 |
| H | -0.09440 | 3.93908  | -3.69616 |
| H | -0.32183 | 1.58411  | -2.92741 |
| C | -3.44213 | 0.94514  | 0.73592  |
| C | -4.44803 | 0.97700  | 1.71325  |
| C | -4.19459 | 0.48424  | 3.00553  |
| C | -2.93005 | -0.03769 | 3.31927  |
| C | -1.91822 | -0.06987 | 2.34371  |
| H | -3.64540 | 1.33540  | -0.26697 |
| H | -5.43147 | 1.38948  | 1.46578  |
| H | -4.98097 | 0.51226  | 3.76635  |
| H | -2.72611 | -0.41584 | 4.32632  |
| H | -0.93011 | -0.47691 | 2.58188  |

TS (9'-9) <sub>Ph</sub>

SCF Energy = -1123.49506800  
 Enthalpy 0K = -1122.958032  
 Enthalpy 298K = -1122.921489  
 Free Energy 298K = -1123.024871  
 SCF(DCM) = -1123.54302570  
 SCF(BP86-D3) = -0.09814710



Lowest Frequencies = -34.9701  
21.1670 cm-1

|    |          |          |          |
|----|----------|----------|----------|
| C  | -2.77046 | -0.30444 | 1.16167  |
| C  | -3.06316 | -1.24423 | 0.14181  |
| C  | -3.55934 | -0.50643 | -1.04138 |
| C  | -3.60089 | 0.88644  | -0.73560 |
| C  | -3.01557 | 1.04771  | 0.60517  |
| Rh | -1.46447 | 0.27684  | -0.60843 |
| P  | 2.84065  | -1.46165 | -2.01094 |
| C  | 3.48059  | -2.75124 | -0.84846 |
| C  | -2.98081 | -2.74092 | 0.23643  |
| C  | -4.02202 | -1.15812 | -2.31116 |
| C  | -4.18711 | 1.98427  | -1.57855 |
| C  | -2.97314 | 2.32392  | 1.39017  |
| C  | -2.34961 | -0.58981 | 2.57241  |
| B  | 1.09266  | -0.67022 | -1.65377 |
| P  | 0.73420  | 0.26688  | 0.06295  |
| C  | 1.08571  | -0.75404 | 1.57020  |
| C  | 1.75394  | 1.80432  | 0.23936  |
| C  | 2.79120  | -2.29021 | -3.66420 |
| C  | 4.17665  | -0.19309 | -2.14458 |
| H  | -4.12050 | 1.75394  | -2.65281 |
| H  | -3.67580 | 2.94401  | -1.40955 |
| H  | -5.25544 | 2.12489  | -1.33038 |
| H  | -3.92019 | 2.45654  | 1.94821  |
| H  | -2.84719 | 3.19838  | 0.73410  |
| H  | -2.15156 | 2.32146  | 2.12283  |
| H  | -1.64635 | 0.16823  | 2.95167  |
| H  | -1.86030 | -1.57156 | 2.66359  |
| H  | -3.23197 | -0.58746 | 3.23936  |
| H  | -3.98128 | -3.17318 | 0.42547  |
| H  | -2.32096 | -3.05927 | 1.05800  |
| H  | -2.60728 | -3.18974 | -0.69870 |
| H  | -5.03458 | -1.58313 | -2.17557 |
| H  | -3.36030 | -1.98818 | -2.60814 |
| H  | -4.06928 | -0.44146 | -3.14485 |
| H  | 1.01938  | 0.16790  | -2.52893 |
| H  | -0.98506 | 1.54168  | -1.42908 |
| H  | 4.47277  | -3.09703 | -1.17912 |
| H  | 2.78559  | -3.60475 | -0.83418 |
| H  | 3.55129  | -2.33860 | 0.16891  |
| H  | 3.78596  | -2.68049 | -3.93084 |
| H  | 2.46558  | -1.55998 | -4.42065 |
| H  | 2.06565  | -3.11751 | -3.63472 |
| H  | 4.26773  | 0.35436  | -1.19434 |
| H  | 3.90294  | 0.52421  | -2.93349 |
| H  | 5.13603  | -0.67179 | -2.39579 |
| H  | 0.26071  | -1.55774 | -1.80008 |
| C  | 1.37098  | -0.16355 | 2.82196  |
| C  | 1.52615  | -0.96357 | 3.96623  |
| C  | 1.39026  | -2.35846 | 3.88062  |
| C  | 1.09029  | -2.95382 | 2.64307  |
| C  | 0.93447  | -2.15821 | 1.49726  |
| H  | 1.48119  | 0.92236  | 2.90382  |
| H  | 1.75327  | -0.49194 | 4.92770  |
| H  | 1.51486  | -2.97902 | 4.77337  |
| H  | 0.98045  | -4.04087 | 2.56952  |
| H  | 0.68641  | -2.62850 | 0.53945  |
| C  | 3.05072  | 1.75662  | 0.80228  |
| C  | 3.83368  | 2.91924  | 0.87753  |
| C  | 3.33506  | 4.13900  | 0.38976  |

|   |         |         |          |
|---|---------|---------|----------|
| C | 2.04852 | 4.19294 | -0.16897 |
| C | 1.25842 | 3.03407 | -0.23969 |
| H | 3.44378 | 0.81537 | 1.20161  |
| H | 4.83314 | 2.87181 | 1.32188  |
| H | 3.94620 | 5.04481 | 0.45133  |
| H | 1.65189 | 5.14160 | -0.54447 |
| H | 0.25109 | 3.07542 | -0.66709 |

9<sub>Ph</sub>  
SCF Energy = -1123.51851123  
Enthalpy 0K = -1122.980637  
Enthalpy 298K = -1122.943789  
Free Energy 298K = -1123.048229  
SCF(DCM) = -1123.56470102  
SCF(BP86-D3) = -0.09966562  
Lowest Frequencies = 19.2594  
34.1011 cm-1

|    |          |          |          |
|----|----------|----------|----------|
| C  | 2.58352  | 1.34432  | 0.52375  |
| C  | 3.10251  | 0.62075  | -0.59606 |
| C  | 3.44613  | -0.73138 | -0.14143 |
| C  | 3.14839  | -0.82850 | 1.26220  |
| C  | 2.55340  | 0.43955  | 1.67935  |
| Rh | 1.21601  | -0.45154 | 0.20522  |
| B  | -0.43306 | -0.88341 | -1.50944 |
| P  | -1.49238 | -2.51817 | -1.66517 |
| C  | -1.60346 | -3.53947 | -0.13475 |
| C  | 3.37078  | 1.16908  | -1.97012 |
| C  | 4.12745  | -1.77793 | -0.97770 |
| C  | 3.48884  | -1.97920 | 2.16894  |
| C  | 2.24259  | 0.83773  | 3.09553  |
| C  | 2.20996  | 2.79830  | 0.54859  |
| P  | -0.89697 | 0.37941  | -0.09190 |
| C  | -2.32792 | -0.00939 | 1.01406  |
| C  | -1.15472 | 2.11292  | -0.66243 |
| C  | -3.22586 | -2.17983 | -2.20489 |
| C  | -0.76830 | -3.62281 | -2.95993 |
| H  | 1.90953  | -0.02392 | 3.69433  |
| H  | 1.45511  | 1.60574  | 3.13881  |
| H  | 3.14295  | 1.25547  | 3.58416  |
| H  | 3.09837  | 3.41211  | 0.78727  |
| H  | 1.44599  | 3.01128  | 1.31190  |
| H  | 1.81859  | 3.13888  | -0.42268 |
| H  | 2.72836  | 2.03499  | -2.19351 |
| H  | 3.20549  | 0.41209  | -2.75345 |
| H  | 4.42090  | 1.50538  | -2.05553 |
| H  | 5.22284  | -1.62535 | -0.96391 |
| H  | 3.80535  | -1.73378 | -2.03004 |
| H  | 3.93040  | -2.79306 | -0.59986 |
| H  | 4.49905  | -1.83831 | 2.59606  |
| H  | 3.48669  | -2.93989 | 1.63132  |
| H  | 2.78121  | -2.05956 | 3.00800  |
| H  | 0.74162  | -1.41990 | -1.19756 |
| H  | 0.48812  | -1.55367 | 1.08073  |
| H  | -3.76273 | -3.12505 | -2.38052 |
| H  | -3.20722 | -1.58816 | -3.13304 |
| H  | -3.73818 | -1.60403 | -1.41867 |
| H  | -1.38087 | -4.53005 | -3.08034 |
| H  | 0.25318  | -3.90726 | -2.66344 |
| H  | -0.72370 | -3.07805 | -3.91540 |
| H  | -2.12528 | -2.96659 | 0.64682  |
| H  | -0.58411 | -3.76462 | 0.21461  |

|   |          |          |          |
|---|----------|----------|----------|
| H | -2.14661 | -4.47499 | -0.34075 |
| H | -0.33716 | -0.40985 | -2.61836 |
| C | -1.68059 | 3.07506  | 0.22977  |
| C | -1.81043 | 4.41313  | -0.17277 |
| C | -1.41386 | 4.80631  | -1.46152 |
| C | -0.88398 | 3.85526  | -2.34982 |
| C | -0.75111 | 2.51517  | -1.95495 |
| H | -1.99996 | 2.77875  | 1.23413  |
| H | -2.22383 | 5.14921  | 0.52398  |
| H | -1.51985 | 5.84978  | -1.77389 |
| H | -0.58091 | 4.15441  | -3.35838 |
| H | -0.34518 | 1.77867  | -2.65488 |
| C | -3.64058 | 0.36110  | 0.63749  |
| C | -4.72735 | 0.03937  | 1.46547  |
| C | -4.51698 | -0.64697 | 2.67417  |
| C | -3.21473 | -1.00559 | 3.05817  |
| C | -2.12191 | -0.68545 | 2.23466  |
| H | -3.81031 | 0.91596  | -0.29147 |
| H | -5.73968 | 0.33125  | 1.16815  |
| H | -5.36640 | -0.89187 | 3.31935  |
| H | -3.04498 | -1.52498 | 4.00677  |
| H | -1.10242 | -0.95240 | 2.53270  |

10<sub>cy</sub>

SCF Energy = -1171.25892618  
 Enthalpy 0K = -1170.538943  
 Enthalpy 298K = -1170.496656  
 Free Energy 298K = -1170.612002  
 SCF(DCM) = -1171.30295617  
 SCF(BP86-D3) = -0.13241044  
 Lowest Frequencies = 12.3763  
 14.3405 cm<sup>-1</sup>

|    |          |          |          |
|----|----------|----------|----------|
| C  | 2.80633  | 1.82354  | 0.93636  |
| C  | 3.80446  | 0.79940  | 0.65672  |
| C  | 3.48735  | -0.36648 | 1.49482  |
| C  | 2.27233  | -0.10229 | 2.18940  |
| C  | 1.83543  | 1.25062  | 1.82144  |
| Rh | 1.90020  | 0.04216  | -0.13167 |
| B  | -0.53015 | -0.83358 | 0.10776  |
| P  | -2.30626 | -0.30268 | -0.57162 |
| C  | -3.55784 | -1.55124 | 0.07663  |
| C  | 5.09778  | 1.03458  | -0.07239 |
| C  | 4.39411  | -1.54586 | 1.70526  |
| C  | 1.61933  | -0.96478 | 3.23127  |
| C  | 0.66235  | 1.95893  | 2.43593  |
| C  | 2.85432  | 3.24355  | 0.45125  |
| P  | 2.33835  | -1.77487 | -1.49976 |
| C  | 4.00808  | -1.78293 | -2.32345 |
| C  | 1.80323  | 1.16662  | -1.93058 |
| C  | 2.28216  | -3.43360 | -0.65531 |
| C  | 1.20838  | -2.04237 | -2.95640 |
| C  | -2.83605 | 1.47108  | -0.26423 |
| H  | 1.85320  | 3.70143  | 0.41352  |
| H  | 3.30070  | 3.31931  | -0.55285 |
| H  | 3.47139  | 3.85677  | 1.13345  |
| H  | 5.81830  | 1.56151  | 0.58098  |
| H  | 4.95279  | 1.65843  | -0.96881 |
| H  | 5.57205  | 0.09228  | -0.38634 |
| H  | 4.92509  | -1.84017 | 0.78585  |
| H  | 3.85014  | -2.42290 | 2.08874  |
| H  | 5.16910  | -1.29019 | 2.45181  |

|   |          |          |          |
|---|----------|----------|----------|
| H | 1.85333  | -0.59288 | 4.24621  |
| H | 1.96462  | -2.00871 | 3.17322  |
| H | 0.52228  | -0.96954 | 3.12616  |
| H | 0.94249  | 2.36593  | 3.42558  |
| H | -0.18651 | 1.27444  | 2.59068  |
| H | 0.32156  | 2.80371  | 1.81738  |
| H | -0.61305 | -0.68458 | 1.30580  |
| H | -2.42330 | -0.42570 | -1.99641 |
| H | 1.47591  | -2.98178 | -3.46636 |
| H | 1.30735  | -1.20594 | -3.66375 |
| H | 0.16798  | -2.09944 | -2.60434 |
| H | 4.11096  | -2.66305 | -2.97908 |
| H | 4.80278  | -1.80837 | -1.56267 |
| H | 4.12186  | -0.86659 | -2.92284 |
| H | 1.28070  | -3.57624 | -0.22200 |
| H | 3.02665  | -3.46177 | 0.15362  |
| H | 2.49530  | -4.24208 | -1.37396 |
| H | 2.80225  | 1.23517  | -2.39523 |
| H | 1.09817  | 0.75245  | -2.66854 |
| H | 1.46454  | 2.18190  | -1.66752 |
| H | 0.19546  | 0.03365  | -0.53010 |
| H | -0.44036 | -1.98976 | -0.24624 |
| C | -4.27647 | 1.79673  | -0.72368 |
| H | -2.77080 | 1.58585  | 0.83669  |
| C | -4.62422 | 3.27326  | -0.43285 |
| H | -4.36388 | 1.60396  | -1.81115 |
| H | -5.00551 | 1.13761  | 0.22215  |
| C | -3.61007 | 4.23797  | -1.07269 |
| H | -5.64532 | 3.48639  | -0.79459 |
| H | -4.64126 | 3.42966  | 0.66372  |
| C | -2.17373 | 3.90597  | -0.62882 |
| H | -3.67826 | 4.16468  | -2.17574 |
| H | -3.85909 | 5.28148  | -0.81236 |
| C | -1.81362 | 2.43351  | -0.92061 |
| H | -1.44846 | 4.56830  | -1.13411 |
| H | -2.07199 | 4.09581  | 0.45829  |
| H | -1.81647 | 2.27037  | -2.01691 |
| H | -0.79080 | 2.21067  | -0.56953 |
| C | -4.75239 | -1.81365 | -0.87049 |
| H | -2.94718 | -2.47579 | 0.12476  |
| C | -5.65148 | -2.93175 | -0.29978 |
| H | -5.34920 | -0.89074 | -0.99015 |
| H | -4.39075 | -2.09082 | -1.87742 |
| C | -6.11912 | -2.61122 | 1.13230  |
| H | -6.51804 | -3.08175 | -0.96740 |
| H | -5.08682 | -3.88470 | -0.29873 |
| C | -4.92362 | -2.34048 | 2.06515  |
| H | -6.77786 | -1.72063 | 1.11243  |
| H | -6.72960 | -3.44158 | 1.52782  |
| C | -4.01785 | -1.21695 | 1.51645  |
| H | -5.27296 | -2.06961 | 3.07703  |
| H | -4.32478 | -3.26563 | 2.17578  |
| H | -4.58410 | -0.26564 | 1.51607  |
| H | -3.14490 | -1.07397 | 2.17867  |

TS(10-11'')<sub>1cy</sub>

SCF Energy = -1171.23104503  
 Enthalpy 0K = -1170.513547  
 Enthalpy 298K = -1170.471535  
 Free Energy 298K = -1170.585311  
 SCF(DCM) = -1171.27758456

SCF(BP86-D3) = -0.13704275  
Lowest Frequencies = -876.3015  
11.9766 cm<sup>-1</sup>

|    |          |          |          |
|----|----------|----------|----------|
| C  | 2.49680  | 2.00667  | 0.60668  |
| C  | 3.67475  | 1.22516  | 0.25428  |
| C  | 3.68566  | 0.06393  | 1.09546  |
| C  | 2.50518  | 0.10316  | 1.95803  |
| C  | 1.80760  | 1.34067  | 1.68579  |
| Rh | 1.75344  | -0.02442 | -0.17834 |
| B  | -0.31594 | -0.80770 | 0.31866  |
| P  | -2.06078 | -0.23230 | -0.45124 |
| C  | -3.34007 | -1.50789 | 0.09635  |
| C  | 4.72675  | 1.64507  | -0.73436 |
| C  | 4.81455  | -0.91823 | 1.23635  |
| C  | 2.21545  | -0.82273 | 3.10671  |
| C  | 0.67887  | 1.89662  | 2.50512  |
| C  | 2.18741  | 3.37116  | 0.05897  |
| P  | 2.09260  | -2.13817 | -1.06210 |
| C  | 3.73155  | -2.34761 | -1.93001 |
| C  | 1.29031  | 0.73535  | -2.24029 |
| C  | 2.08411  | -3.56056 | 0.13754  |
| C  | 0.92320  | -2.71194 | -2.39414 |
| C  | -2.66478 | 1.52243  | -0.14296 |
| H  | 1.12877  | 3.64305  | 0.19098  |
| H  | 2.43232  | 3.45077  | -1.01299 |
| H  | 2.78983  | 4.13595  | 0.58338  |
| H  | 5.39774  | 2.40830  | -0.29867 |
| H  | 4.28172  | 2.08856  | -1.64157 |
| H  | 5.35549  | 0.79811  | -1.05080 |
| H  | 5.46805  | -0.93501 | 0.35066  |
| H  | 4.46172  | -1.94347 | 1.43072  |
| H  | 5.44493  | -0.63062 | 2.09830  |
| H  | 2.59023  | -0.39648 | 4.05609  |
| H  | 2.69807  | -1.80371 | 2.97568  |
| H  | 1.13266  | -0.99278 | 3.22262  |
| H  | 1.07851  | 2.39042  | 3.41045  |
| H  | -0.01074 | 1.10476  | 2.83674  |
| H  | 0.09695  | 2.65070  | 1.95272  |
| H  | -0.45951 | -0.55673 | 1.49863  |
| H  | -2.14207 | -0.32312 | -1.88431 |
| H  | 1.19363  | -3.73220 | -2.71099 |
| H  | 0.99350  | -2.04017 | -3.26310 |
| H  | -0.10697 | -2.70990 | -2.01157 |
| H  | 3.81323  | -3.35889 | -2.36149 |
| H  | 4.55528  | -2.19342 | -1.21846 |
| H  | 3.81543  | -1.60258 | -2.73647 |
| H  | 1.11698  | -3.58157 | 0.66083  |
| H  | 2.88645  | -3.41982 | 0.87769  |
| H  | 2.24545  | -4.51386 | -0.39174 |
| H  | 2.29151  | 0.56945  | -2.66457 |
| H  | 0.56081  | 0.26366  | -2.91968 |
| H  | 1.08152  | 1.81334  | -2.19169 |
| H  | 0.47707  | 0.21055  | -1.12302 |
| H  | -0.41445 | -2.00179 | 0.09611  |
| C  | -4.09659 | 1.81411  | -0.65131 |
| H  | -2.64371 | 1.62425  | 0.96095  |
| C  | -4.49892 | 3.27717  | -0.36183 |
| H  | -4.14070 | 1.62905  | -1.74285 |
| H  | -4.82499 | 1.13166  | -0.18216 |
| C  | -3.49158 | 4.27869  | -0.95377 |
| H  | -5.51121 | 3.46307  | -0.76159 |

|   |          |          |          |
|---|----------|----------|----------|
| H | -4.56374 | 3.42345  | 0.73423  |
| C | -2.06468 | 3.98452  | -0.45652 |
| H | -3.51406 | 4.21318  | -2.05931 |
| H | -3.78199 | 5.31187  | -0.69529 |
| C | -1.65384 | 2.52616  | -0.74892 |
| H | -1.34045 | 4.67418  | -0.92633 |
| H | -2.01155 | 4.16528  | 0.63563  |
| H | -1.61206 | 2.37705  | -1.84683 |
| H | -0.64072 | 2.32526  | -0.35946 |
| C | -4.48319 | -1.76266 | -0.91393 |
| H | -2.72150 | -2.42656 | 0.15006  |
| C | -5.38090 | -2.91847 | -0.42134 |
| H | -5.09671 | -0.85097 | -1.03252 |
| H | -4.06956 | -1.99830 | -1.91166 |
| C | -5.92389 | -2.65268 | 0.99567  |
| H | -6.21090 | -3.06875 | -1.13405 |
| H | -4.79352 | -3.85775 | -0.42067 |
| C | -4.78096 | -2.38352 | 1.99282  |
| H | -6.60153 | -1.77652 | 0.96973  |
| H | -6.53328 | -3.50803 | 1.33605  |
| C | -3.87519 | -1.22577 | 1.52111  |
| H | -5.18501 | -2.15103 | 2.99387  |
| H | -4.16705 | -3.29848 | 2.10574  |
| H | -4.46105 | -0.28634 | 1.52198  |
| H | -3.03680 | -1.08527 | 2.22685  |

INT(10-11'' )<sub>cy</sub>

SCF Energy = -1171.24386441  
Enthalpy 0K = -1170.523122  
Enthalpy 298K = -1170.480446  
Free Energy 298K = -1170.594628  
SCF(DCM) = -1171.28886353  
SCF(BP86-D3) = -0.13708551  
Lowest Frequencies = 23.8603  
27.4137 cm<sup>-1</sup>

|    |          |          |          |
|----|----------|----------|----------|
| C  | 2.57305  | 1.97160  | 0.50431  |
| C  | 3.73299  | 1.16039  | 0.09432  |
| C  | 3.75954  | 0.01131  | 0.91616  |
| C  | 2.58514  | 0.06817  | 1.82797  |
| C  | 1.93165  | 1.35951  | 1.62606  |
| Rh | 1.70751  | -0.09205 | -0.12318 |
| B  | -0.29415 | -0.74013 | 0.57670  |
| P  | -1.96335 | -0.19420 | -0.33977 |
| C  | -3.32449 | -1.43247 | 0.09296  |
| C  | 4.73176  | 1.56636  | -0.95251 |
| C  | 4.85183  | -1.01501 | 1.00298  |
| C  | 2.37267  | -0.82487 | 3.01574  |
| C  | 0.90684  | 1.97482  | 2.53310  |
| C  | 2.27564  | 3.32646  | -0.07002 |
| P  | 1.82504  | -2.26380 | -0.91255 |
| C  | 3.35186  | -2.61276 | -1.93487 |
| C  | 1.14344  | 0.79934  | -2.71095 |
| C  | 1.86389  | -3.64760 | 0.33009  |
| C  | 0.49188  | -2.81810 | -2.09338 |
| C  | -2.53371 | 1.57557  | -0.04859 |
| H  | 1.27666  | 3.69151  | 0.21008  |
| H  | 2.35482  | 3.33528  | -1.16978 |
| H  | 3.01377  | 4.05919  | 0.30720  |
| H  | 5.41468  | 2.34600  | -0.56621 |
| H  | 4.24376  | 1.98718  | -1.84810 |
| H  | 5.35353  | 0.71726  | -1.27620 |

|   |          |          |          |
|---|----------|----------|----------|
| H | 5.46402  | -1.05012 | 0.08847  |
| H | 4.46329  | -2.02665 | 1.20143  |
| H | 5.52944  | -0.76638 | 1.84124  |
| H | 2.90412  | -0.41653 | 3.89669  |
| H | 2.75973  | -1.84092 | 2.84244  |
| H | 1.30514  | -0.90297 | 3.27224  |
| H | 1.40486  | 2.43930  | 3.40465  |
| H | 0.19856  | 1.22196  | 2.91186  |
| H | 0.32621  | 2.76237  | 2.02728  |
| H | -0.47136 | -0.28749 | 1.69449  |
| H | -1.95620 | -0.26948 | -1.77700 |
| H | 0.69660  | -3.84594 | -2.43457 |
| H | 0.47131  | -2.14868 | -2.96670 |
| H | -0.48289 | -2.78718 | -1.58725 |
| H | 3.33499  | -3.64865 | -2.31249 |
| H | 4.25567  | -2.46739 | -1.32536 |
| H | 3.38547  | -1.91735 | -2.78815 |
| H | 0.95310  | -3.60400 | 0.94491  |
| H | 2.74429  | -3.53559 | 0.98118  |
| H | 1.92227  | -4.61941 | -0.18658 |
| H | 2.20801  | 0.55155  | -2.80474 |
| H | 0.57053  | 0.28484  | -3.49651 |
| H | 1.00043  | 1.88645  | -2.78336 |
| H | 0.67849  | 0.47866  | -1.72742 |
| H | -0.45634 | -1.95166 | 0.58948  |
| C | -3.94577 | 1.92234  | -0.57208 |
| H | -2.52421 | 1.67253  | 1.05581  |
| C | -4.29887 | 3.39507  | -0.26714 |
| H | -3.98366 | 1.75175  | -1.66610 |
| H | -4.70334 | 1.26186  | -0.11868 |
| C | -3.24943 | 4.36885  | -0.83171 |
| H | -5.29893 | 3.62409  | -0.67525 |
| H | -4.37080 | 3.52777  | 0.83025  |
| C | -1.83918 | 4.01662  | -0.32309 |
| H | -3.26063 | 4.32057  | -1.93841 |
| H | -3.50599 | 5.40792  | -0.56098 |
| C | -1.48071 | 2.54793  | -0.63199 |
| H | -1.08645 | 4.68733  | -0.77599 |
| H | -1.79235 | 4.18093  | 0.77195  |
| H | -1.44016 | 2.41189  | -1.73173 |
| H | -0.47904 | 2.29473  | -0.24061 |
| C | -4.44249 | -1.57647 | -0.96422 |
| H | -2.75217 | -2.38241 | 0.11781  |
| C | -5.42539 | -2.69728 | -0.55996 |
| H | -4.99956 | -0.62735 | -1.06238 |
| H | -4.00602 | -1.79050 | -1.95729 |
| C | -6.00127 | -2.46285 | 0.84932  |
| H | -6.23702 | -2.76297 | -1.30599 |
| H | -4.89705 | -3.67089 | -0.58384 |
| C | -4.88081 | -2.32046 | 1.89537  |
| H | -6.61793 | -1.54224 | 0.84454  |
| H | -6.67821 | -3.28978 | 1.12660  |
| C | -3.88663 | -1.20056 | 1.51697  |
| H | -5.30454 | -2.11464 | 2.89423  |
| H | -4.33042 | -3.27819 | 1.97888  |
| H | -4.41039 | -0.22570 | 1.55889  |
| H | -3.06138 | -1.15470 | 2.25022  |

TS(10-11'')<sub>2cy</sub>  
 SCF Energy = -1171.24268206  
 Enthalpy 0K = -1170.524114

Enthalpy 298K = -1170.480955  
 Free Energy 298K = -1170.597980  
 SCF(DCM) = -1171.28823084  
 SCF(BP86-D3) = -0.13380075  
 Lowest Frequencies = -25.0841  
 18.4530 cm<sup>-1</sup>

|    |          |          |          |
|----|----------|----------|----------|
| C  | 3.67662  | 1.08045  | -0.15187 |
| C  | 3.88397  | -0.11182 | 0.56610  |
| C  | 2.91490  | -0.13411 | 1.69717  |
| C  | 2.24446  | 1.16762  | 1.74075  |
| C  | 2.62843  | 1.85452  | 0.55134  |
| Rh | 1.62072  | -0.15903 | 0.01157  |
| B  | -0.32621 | -0.64384 | 0.86487  |
| P  | -1.92206 | -0.12310 | -0.19426 |
| C  | -2.55741 | 1.63848  | 0.01611  |
| C  | 4.95864  | -1.13695 | 0.34837  |
| C  | 2.92164  | -1.12820 | 2.81899  |
| C  | 1.45003  | 1.70039  | 2.89592  |
| C  | 2.22026  | 3.23814  | 0.14088  |
| C  | 4.42229  | 1.56679  | -1.36162 |
| P  | 1.52348  | -2.26127 | -0.96625 |
| C  | 1.73386  | -3.70467 | 0.18840  |
| C  | 0.00017  | -2.75354 | -1.92317 |
| C  | 2.84629  | -2.55743 | -2.25077 |
| C  | -3.31504 | -1.35779 | 0.15499  |
| C  | 0.80755  | 1.15912  | -3.15028 |
| H  | 1.32539  | 3.58305  | 0.67788  |
| H  | 2.02474  | 3.30351  | -0.94183 |
| H  | 3.03997  | 3.94783  | 0.36204  |
| H  | 5.17757  | 2.32380  | -1.07813 |
| H  | 3.75004  | 2.04380  | -2.09359 |
| H  | 4.95218  | 0.74835  | -1.87319 |
| H  | 5.37798  | -1.08946 | -0.66869 |
| H  | 4.60357  | -2.16439 | 0.53093  |
| H  | 5.79215  | -0.96092 | 1.05415  |
| H  | 3.65373  | -0.81987 | 3.59076  |
| H  | 3.21029  | -2.13372 | 2.47668  |
| H  | 1.93394  | -1.19593 | 3.29975  |
| H  | 2.13295  | 2.03861  | 3.69740  |
| H  | 0.78202  | 0.93521  | 3.32158  |
| H  | 0.82999  | 2.56305  | 2.60653  |
| H  | -0.48269 | -0.04176 | 1.91359  |
| H  | -1.79951 | -0.22815 | -1.62316 |
| H  | 0.15084  | -3.74476 | -2.38102 |
| H  | -0.19655 | -2.01681 | -2.71688 |
| H  | -0.86161 | -2.79715 | -1.24199 |
| H  | 2.76769  | -3.57689 | -2.66352 |
| H  | 3.84136  | -2.42525 | -1.80264 |
| H  | 2.72680  | -1.82570 | -3.06444 |
| H  | 0.95770  | -3.64664 | 0.96594  |
| H  | 2.72446  | -3.65955 | 0.66700  |
| H  | 1.64482  | -4.65482 | -0.36311 |
| H  | 1.67595  | 1.07177  | -3.81950 |
| H  | -0.02661 | 0.56109  | -3.54499 |
| H  | 0.50081  | 2.21234  | -3.07178 |
| H  | 1.09460  | 0.78824  | -2.14005 |
| H  | -0.53460 | -1.84158 | 1.00776  |
| C  | -3.51809 | 2.09983  | -1.10598 |
| H  | -3.10839 | 1.60891  | 0.97780  |
| C  | -4.02132 | 3.53720  | -0.84875 |
| H  | -2.98016 | 2.06528  | -2.07429 |

|   |          |          |          |
|---|----------|----------|----------|
| H | -4.37890 | 1.41758  | -1.19985 |
| C | -2.85781 | 4.52903  | -0.67306 |
| H | -4.67647 | 3.85018  | -1.68080 |
| H | -4.65020 | 3.54185  | 0.06304  |
| C | -1.89134 | 4.05983  | 0.42971  |
| H | -2.30502 | 4.61909  | -1.62930 |
| H | -3.24524 | 5.53627  | -0.44023 |
| C | -1.38097 | 2.62779  | 0.16401  |
| H | -1.03465 | 4.75368  | 0.51181  |
| H | -2.40741 | 4.08381  | 1.40962  |
| H | -0.78563 | 2.62114  | -0.77080 |
| H | -0.70904 | 2.29062  | 0.97134  |
| C | -4.44689 | -1.42288 | -0.89218 |
| H | -2.76103 | -2.31905 | 0.12578  |
| C | -5.42198 | -2.57286 | -0.55442 |
| H | -5.01113 | -0.47186 | -0.89428 |
| H | -4.03357 | -1.55218 | -1.90928 |
| C | -5.98929 | -2.42630 | 0.87012  |
| H | -6.23827 | -2.59596 | -1.29781 |
| H | -4.88835 | -3.53987 | -0.64262 |
| C | -4.86458 | -2.33006 | 1.91712  |
| H | -6.61572 | -1.51384 | 0.92046  |
| H | -6.65560 | -3.27486 | 1.10444  |
| C | -3.87178 | -1.19241 | 1.58891  |
| H | -5.28570 | -2.17106 | 2.92551  |
| H | -4.31200 | -3.28935 | 1.95588  |
| H | -4.39854 | -0.22118 | 1.66855  |
| H | -3.04714 | -1.17650 | 2.32382  |

11''<sub>cy</sub>

SCF Energy = -1130.73285223  
 Enthalpy 0K = -1130.060204  
 Enthalpy 298K = -1130.020495  
 Free Energy 298K = -1130.130033  
 SCF(DCM) = -1130.77873946  
 SCF(BP86-D3) = -0.12632675  
 Lowest Frequencies = 13.3988  
 22.6011 cm<sup>-1</sup>

|    |          |          |          |
|----|----------|----------|----------|
| C  | -2.08383 | -0.89866 | -2.10000 |
| C  | -1.85057 | 0.50464  | -2.19667 |
| C  | -2.88289 | 1.20328  | -1.39027 |
| C  | -3.71750 | 0.24335  | -0.77972 |
| C  | -3.15509 | -1.08124 | -1.10772 |
| Rh | -1.48309 | -0.19485 | -0.06959 |
| B  | 0.36097  | -1.32159 | -0.30417 |
| P  | 1.91016  | -0.42822 | 0.50107  |
| C  | 1.91814  | 1.42328  | 0.20011  |
| C  | -0.86936 | 1.18185  | -3.11113 |
| C  | -3.05032 | 2.69356  | -1.34032 |
| C  | -4.99439 | 0.50572  | -0.03165 |
| C  | -3.81134 | -2.39772 | -0.80993 |
| C  | -1.48589 | -1.98744 | -2.94105 |
| P  | -1.69865 | -0.96453 | 2.12036  |
| C  | -3.42786 | -0.91190 | 2.82259  |
| C  | -1.21123 | -2.72097 | 2.50643  |
| C  | -0.79697 | -0.01556 | 3.45800  |
| C  | 3.52462  | -1.22639 | -0.06593 |
| H  | -2.08214 | 3.21709  | -1.28760 |
| H  | -3.66066 | 3.00962  | -0.48051 |
| H  | -3.55725 | 3.05145  | -2.25646 |
| H  | -5.84049 | 0.59241  | -0.73898 |

|   |          |          |          |
|---|----------|----------|----------|
| H | -4.95353 | 1.44505  | 0.54333  |
| H | -5.24320 | -0.30797 | 0.66552  |
| H | -4.33986 | -2.38949 | 0.15598  |
| H | -3.08404 | -3.22400 | -0.80512 |
| H | -4.56457 | -2.62294 | -1.58951 |
| H | -2.18167 | -2.24089 | -3.76311 |
| H | -1.29882 | -2.90363 | -2.35995 |
| H | -0.53188 | -1.67795 | -3.39166 |
| H | -1.31953 | 1.36153  | -4.10549 |
| H | 0.03035  | 0.56399  | -3.25867 |
| H | -0.55274 | 2.16147  | -2.71777 |
| H | 0.39971  | -2.45899 | 0.12826  |
| H | 0.68854  | -1.26754 | -1.48133 |
| H | 2.02767  | -0.48794 | 1.93318  |
| H | -1.01678 | -0.46213 | 4.44187  |
| H | -1.13222 | 1.03338  | 3.45700  |
| H | 0.28943  | -0.04494 | 3.28899  |
| H | -3.41596 | -1.22326 | 3.87996  |
| H | -4.08369 | -1.59483 | 2.26225  |
| H | -3.82791 | 0.11025  | 2.74707  |
| H | -0.14094 | -2.86203 | 2.29864  |
| H | -1.77637 | -3.40447 | 1.85422  |
| H | -1.42542 | -2.95646 | 3.56169  |
| C | 3.10288  | 2.19808  | 0.82629  |
| H | 1.96411  | 1.52066  | -0.90372 |
| C | 3.00246  | 3.70758  | 0.51688  |
| H | 3.09885  | 2.04333  | 1.92324  |
| H | 4.06318  | 1.80244  | 0.45392  |
| C | 1.65422  | 4.29612  | 0.96850  |
| H | 3.83730  | 4.24007  | 1.00498  |
| H | 3.12672  | 3.86271  | -0.57265 |
| C | 0.46904  | 3.51729  | 0.35882  |
| H | 1.58489  | 4.25531  | 2.07311  |
| H | 1.58560  | 5.36189  | 0.68927  |
| C | 0.58132  | 2.01787  | 0.68980  |
| H | -0.48986 | 3.91691  | 0.73403  |
| H | 0.46888  | 3.65201  | -0.74078 |
| H | 0.48761  | 1.87598  | 1.78151  |
| H | -0.29503 | 1.46763  | 0.21735  |
| C | 4.66181  | -1.17394 | 0.98017  |
| H | 3.21630  | -2.28423 | -0.19318 |
| C | 5.89766  | -1.94735 | 0.46953  |
| H | 4.94549  | -0.12223 | 1.17558  |
| H | 4.31929  | -1.59507 | 1.94304  |
| C | 6.36322  | -1.42977 | -0.90399 |
| H | 6.71229  | -1.87100 | 1.21107  |
| H | 5.64338  | -3.02256 | 0.39124  |
| C | 5.22244  | -1.47624 | -1.93744 |
| H | 6.72213  | -0.38660 | -0.80052 |
| H | 7.22410  | -2.02136 | -1.26128 |
| C | 3.98072  | -0.69931 | -1.44709 |
| H | 5.55671  | -1.06242 | -2.90521 |
| H | 4.93764  | -2.52959 | -2.12684 |
| H | 4.23838  | 0.37497  | -1.36855 |
| H | 3.15979  | -0.78503 | -2.18164 |

TS(11''-11)<sub>cy</sub>

SCF Energy = -1130.72503462  
 Enthalpy 0K = -1130.052420  
 Enthalpy 298K = -1130.012963  
 Free Energy 298K = -1130.122139

SCF(DCM) = -1130.77108809  
SCF(BP86-D3) = -0.11774398  
Lowest Frequencies = -21.0852  
14.6139 cm<sup>-1</sup>

|    |          |          |          |
|----|----------|----------|----------|
| C  | -2.52622 | -0.40647 | -2.12113 |
| C  | -2.90375 | 0.92730  | -1.79156 |
| C  | -3.91969 | 0.88976  | -0.70304 |
| C  | -4.12513 | -0.45461 | -0.34000 |
| C  | -3.15797 | -1.26731 | -1.11229 |
| Rh | -1.82753 | 0.03125  | -0.04131 |
| B  | 0.20267  | -0.21577 | -0.71670 |
| P  | 1.93613  | -0.03195 | 0.22072  |
| C  | 2.81243  | 1.56707  | -0.24344 |
| C  | -2.48308 | 2.17516  | -2.50713 |
| C  | -4.63418 | 2.10016  | -0.17933 |
| C  | -5.16155 | -1.00501 | 0.59552  |
| C  | -3.08301 | -2.76323 | -1.08944 |
| C  | -1.70836 | -0.84901 | -3.29757 |
| P  | -1.42203 | -0.40032 | 2.21305  |
| C  | -2.92658 | -0.64680 | 3.28932  |
| C  | -0.41414 | -1.90273 | 2.66497  |
| C  | -0.57867 | 0.98747  | 3.13952  |
| C  | 3.00860  | -1.55410 | -0.07438 |
| H  | -3.93891 | 2.93587  | 0.00654  |
| H  | -5.17056 | 1.88620  | 0.75787  |
| H  | -5.37901 | 2.45965  | -0.91424 |
| H  | -6.07068 | -1.28388 | 0.03041  |
| H  | -5.46368 | -0.27318 | 1.36051  |
| H  | -4.81457 | -1.91601 | 1.10822  |
| H  | -3.28712 | -3.16810 | -0.08587 |
| H  | -2.09424 | -3.12088 | -1.41380 |
| H  | -3.83950 | -3.18921 | -1.77714 |
| H  | -2.32247 | -0.82375 | -4.21605 |
| H  | -1.33577 | -1.87608 | -3.16943 |
| H  | -0.83410 | -0.19635 | -3.45268 |
| H  | -3.25226 | 2.46670  | -3.24761 |
| H  | -1.53405 | 2.03242  | -3.04492 |
| H  | -2.36553 | 3.02235  | -1.81161 |
| H  | 0.29497  | -1.32305 | -1.22227 |
| H  | 0.25832  | 0.68426  | -1.55002 |
| H  | 1.96386  | 0.05308  | 1.65752  |
| H  | -0.41492 | 0.70047  | 4.19153  |
| H  | -1.22027 | 1.88196  | 3.10451  |
| H  | 0.38535  | 1.23235  | 2.67169  |
| H  | -2.62343 | -0.76298 | 4.34286  |
| H  | -3.47368 | -1.54699 | 2.97334  |
| H  | -3.59238 | 0.22470  | 3.19814  |
| H  | 0.58869  | -1.82889 | 2.22109  |
| H  | -0.90876 | -2.79687 | 2.25492  |
| H  | -0.32574 | -2.00033 | 3.75967  |
| C  | 4.24833  | 1.71187  | 0.30681  |
| H  | 2.84544  | 1.54103  | -1.35121 |
| C  | 4.87000  | 3.06391  | -0.10938 |
| H  | 4.22598  | 1.64364  | 1.41260  |
| H  | 4.88564  | 0.88571  | -0.05132 |
| C  | 3.99095  | 4.25344  | 0.31528  |
| H  | 5.88074  | 3.15112  | 0.32674  |
| H  | 5.00113  | 3.07759  | -1.20913 |
| C  | 2.56104  | 4.10694  | -0.23454 |
| H  | 3.95460  | 4.30754  | 1.42130  |
| H  | 4.43836  | 5.20184  | -0.02997 |

|   |         |          |          |
|---|---------|----------|----------|
| C | 1.92727 | 2.76357  | 0.18793  |
| H | 1.92292 | 4.93967  | 0.11125  |
| H | 2.58208 | 4.16436  | -1.34047 |
| H | 1.81875 | 2.75159  | 1.29199  |
| H | 0.91403 | 2.66413  | -0.24002 |
| C | 4.10870 | -1.81421 | 0.97960  |
| H | 2.25599 | -2.36684 | 0.00422  |
| C | 4.82564 | -3.15071 | 0.68913  |
| H | 4.85091 | -0.99534 | 0.96310  |
| H | 3.67401 | -1.82530 | 1.99645  |
| C | 5.39288 | -3.18958 | -0.74281 |
| H | 5.62983 | -3.30651 | 1.42977  |
| H | 4.10889 | -3.98479 | 0.82406  |
| C | 4.29521 | -2.91752 | -1.78847 |
| H | 6.18993 | -2.42643 | -0.84177 |
| H | 5.87057 | -4.16595 | -0.93640 |
| C | 3.56845 | -1.58308 | -1.51727 |
| H | 4.72267 | -2.90504 | -2.80661 |
| H | 3.55492 | -3.74144 | -1.76792 |
| H | 4.28123 | -0.74661 | -1.65392 |
| H | 2.75283 | -1.43450 | -2.24776 |

11<sub>cy</sub>  
SCF Energy = -1130.74557428  
Enthalpy 0K = -1130.072193  
Enthalpy 298K = -1130.032564  
Free Energy 298K = -1130.142874  
SCF(DCM) = -1130.79039981  
SCF(BP86-D3) = -0.11770655  
Lowest Frequencies = 13.2549  
24.5465 cm<sup>-1</sup>

|    |          |          |          |
|----|----------|----------|----------|
| C  | 4.12600  | -0.23754 | -0.40195 |
| C  | 3.57885  | 1.11427  | -0.27070 |
| C  | 2.71577  | 1.37785  | -1.42158 |
| C  | 2.62034  | 0.15506  | -2.16671 |
| C  | 3.49577  | -0.84113 | -1.52502 |
| Rh | 1.78234  | -0.17292 | -0.10075 |
| B  | -0.17948 | -0.09834 | -0.60172 |
| P  | -1.94295 | -0.09154 | 0.25762  |
| C  | -3.12588 | -1.38629 | -0.42968 |
| C  | 4.08111  | 2.17123  | 0.67400  |
| C  | 2.15069  | 2.71697  | -1.80487 |
| C  | 1.91276  | -0.03697 | -3.47797 |
| C  | 3.75542  | -2.22233 | -2.05514 |
| C  | 5.23399  | -0.83361 | 0.42072  |
| P  | 1.47217  | -0.38053 | 2.18537  |
| C  | 0.61662  | 1.01231  | 3.09161  |
| C  | 0.52134  | -1.88928 | 2.74153  |
| C  | 3.00938  | -0.56260 | 3.22816  |
| C  | -2.64353 | 1.65277  | 0.09740  |
| H  | 2.85606  | -2.66043 | -2.51509 |
| H  | 4.10091  | -2.90497 | -1.26336 |
| H  | 4.54041  | -2.19267 | -2.83433 |
| H  | 6.21194  | -0.63951 | -0.05862 |
| H  | 5.13279  | -1.92629 | 0.52065  |
| H  | 5.28214  | -0.40178 | 1.43145  |
| H  | 4.44252  | 1.74455  | 1.62260  |
| H  | 3.30444  | 2.91698  | 0.90413  |
| H  | 4.93279  | 2.71155  | 0.21901  |
| H  | 2.89255  | 3.28893  | -2.39407 |
| H  | 1.89578  | 3.32062  | -0.91992 |

|   |          |          |          |    |          |          |          |
|---|----------|----------|----------|----|----------|----------|----------|
| H | 1.24472  | 2.61535  | -2.42122 | C  | -2.56176 | 0.78680  | -1.99304 |
| H | 2.59462  | 0.18293  | -4.32004 | C  | -3.42736 | 1.36433  | -0.95891 |
| H | 1.04230  | 0.63102  | -3.57169 | Rh | -1.72513 | 0.08323  | -0.02029 |
| H | 1.55739  | -1.07235 | -3.60257 | B  | 0.15780  | -0.02908 | -0.57497 |
| H | -0.46310 | 0.21419  | -1.74405 | P  | 1.93723  | -0.01315 | 0.28334  |
| H | -1.99306 | -0.34819 | 1.66781  | C  | 2.92537  | 1.54143  | -0.10511 |
| H | 0.38749  | -1.89046 | 3.83592  | C  | -4.14713 | -2.32996 | -0.54068 |
| H | 1.08211  | -2.78783 | 2.44004  | C  | -2.14918 | -1.62763 | -2.94294 |
| H | -0.46355 | -1.92064 | 2.25331  | C  | -1.84658 | 1.56645  | -3.06212 |
| H | 2.73317  | -0.70497 | 4.28605  | C  | -3.68113 | 2.83302  | -0.75854 |
| H | 3.63117  | 0.34140  | 3.14332  | C  | -5.20331 | 0.44454  | 0.71392  |
| H | 3.59003  | -1.43125 | 2.88370  | P  | -1.47141 | -0.69633 | 2.13827  |
| H | -0.39080 | 1.16226  | 2.67616  | C  | -0.52619 | -2.28608 | 2.40477  |
| H | 1.19184  | 1.93855  | 2.93636  | C  | -0.66795 | 0.47303  | 3.35114  |
| H | 0.54321  | 0.80332  | 4.17204  | C  | -3.04648 | -1.08373 | 3.05717  |
| H | 0.44970  | -1.28990 | -0.45431 | C  | 2.84959  | -1.58394 | -0.22632 |
| C | -4.51706 | -1.37023 | 0.24487  | H  | -2.79736 | 3.43923  | -1.01059 |
| H | -3.23111 | -1.11625 | -1.49943 | H  | -3.96134 | 3.06026  | 0.28180  |
| C | -5.43261 | -2.45984 | -0.35667 | H  | -4.51011 | 3.17287  | -1.40746 |
| H | -4.39647 | -1.55078 | 1.33144  | H  | -6.16529 | 0.58363  | 0.18564  |
| H | -4.99362 | -0.38078 | 0.13684  | H  | -5.06490 | 1.32172  | 1.36687  |
| C | -4.79081 | -3.85571 | -0.27137 | H  | -5.31554 | -0.44487 | 1.35206  |
| H | -6.40588 | -2.44552 | 0.16453  | H  | -4.49110 | -2.41417 | 0.50239  |
| H | -5.64067 | -2.21275 | -1.41602 | H  | -3.40060 | -3.11992 | -0.71765 |
| C | -3.40174 | -3.86840 | -0.93499 | H  | -5.01926 | -2.54910 | -1.18512 |
| H | -4.69274 | -4.15106 | 0.79181  | H  | -2.83563 | -1.73958 | -3.80307 |
| H | -5.44667 | -4.60642 | -0.74535 | H  | -2.00993 | -2.62565 | -2.49893 |
| C | -2.47418 | -2.78864 | -0.33691 | H  | -1.17737 | -1.29351 | -3.33913 |
| H | -2.92594 | -4.85892 | -0.82655 | H  | -2.51637 | 1.73996  | -3.92459 |
| H | -3.50879 | -3.68855 | -2.02255 | H  | -0.96069 | 1.02884  | -3.43534 |
| H | -2.27866 | -3.02913 | 0.72792  | H  | -1.51762 | 2.55193  | -2.69677 |
| H | -1.49679 | -2.79592 | -0.85191 | H  | 0.43955  | -0.02348 | -1.76162 |
| C | -3.54910 | 2.06708  | 1.28177  | H  | 1.95186  | -0.05761 | 1.71599  |
| H | -1.72870 | 2.27922  | 0.12351  | H  | -0.58201 | 0.01058  | 4.34837  |
| C | -4.01161 | 3.53128  | 1.12103  | H  | -1.28790 | 1.38052  | 3.41869  |
| H | -4.43576 | 1.40687  | 1.32661  | H  | 0.33127  | 0.76762  | 2.99773  |
| H | -3.01236 | 1.94024  | 2.24002  | H  | -2.81393 | -1.40202 | 4.08681  |
| C | -4.70624 | 3.76152  | -0.23414 | H  | -3.59029 | -1.89214 | 2.54588  |
| H | -4.68577 | 3.79576  | 1.95448  | H  | -3.68172 | -0.18654 | 3.08752  |
| H | -3.13270 | 4.20061  | 1.20312  | H  | 0.51225  | -2.16671 | 2.06089  |
| C | -3.79859 | 3.34375  | -1.40557 | H  | -0.99765 | -3.08131 | 1.80672  |
| H | -5.64452 | 3.17367  | -0.26951 | H  | -0.52658 | -2.57536 | 3.46908  |
| H | -4.99775 | 4.82117  | -0.33692 | H  | -0.76449 | 1.29667  | 0.41036  |
| C | -3.33596 | 1.87682  | -1.26949 | C  | 4.30242  | 1.59003  | 0.59797  |
| H | -4.32206 | 3.47303  | -2.36905 | H  | 3.07223  | 1.49845  | -1.20276 |
| H | -2.90995 | 4.00409  | -1.43963 | C  | 5.05063  | 2.89551  | 0.24669  |
| H | -4.21848 | 1.21370  | -1.35135 | H  | 4.15216  | 1.53501  | 1.69424  |
| H | -2.65485 | 1.61101  | -2.09747 | H  | 4.91805  | 0.71841  | 0.31522  |
|   |          |          |          | C  | 4.21055  | 4.14267  | 0.57559  |
|   |          |          |          | H  | 6.01270  | 2.91842  | 0.78790  |
|   |          |          |          | H  | 5.29794  | 2.89066  | -0.83276 |
|   |          |          |          | C  | 2.83897  | 4.08585  | -0.12086 |
|   |          |          |          | H  | 4.06347  | 4.20859  | 1.67159  |
|   |          |          |          | H  | 4.75330  | 5.05627  | 0.27729  |
|   |          |          |          | C  | 2.07482  | 2.79237  | 0.23187  |
|   |          |          |          | H  | 2.22384  | 4.95971  | 0.15694  |
|   |          |          |          | H  | 2.97782  | 4.13506  | -1.21862 |
|   |          |          |          | H  | 1.84005  | 2.79270  | 1.31523  |
|   |          |          |          | H  | 1.10871  | 2.76117  | -0.30266 |
|   |          |          |          | C  | 3.82508  | -2.10978 | 0.85413  |
|   |          |          |          | H  | 2.02651  | -2.31973 | -0.33792 |

TS (11-11')<sub>cy</sub>  
SCF Energy = -1130.73930064  
Enthalpy 0K = -1130.067731  
Enthalpy 298K = -1130.028289  
Free Energy 298K = -1130.138006  
SCF(DCM) = -1130.78478388  
SCF(BP86-D3) = -0.11803709  
Lowest Frequencies = -346.8194  
16.2589 cm<sup>-1</sup>  
C -4.08564 0.29597 -0.28227  
C -3.59876 -0.96247 -0.84790  
C -2.71225 -0.64865 -1.94962

C 4.46560 -3.43932 0.39997  
H 4.62173 -1.36337 1.03375  
H 3.29813 -2.24807 1.81622  
C 5.15524 -3.29791 -0.96988  
H 5.18507 -3.77832 1.16575  
H 3.68055 -4.21852 0.33974  
C 4.17895 -2.76723 -2.03583  
H 6.01227 -2.60212 -0.87864  
H 5.57360 -4.26887 -1.28674  
C 3.53851 -1.42992 -1.60431  
H 4.69477 -2.62908 -3.00210  
H 3.37898 -3.51301 -2.21028  
H 4.32812 -0.65706 -1.53713  
H 2.81508 -1.08837 -2.36607

11'<sub>cy</sub>

SCF Energy = -1130.74027814  
Enthalpy 0K = -1130.067010  
Enthalpy 298K = -1130.027432  
Free Energy 298K = -1130.136866  
SCF(DCM) = -1130.78554586  
SCF(BP86-D3) = -0.11847805  
Lowest Frequencies = 15.6440

21.7771 cm<sup>-1</sup>

C 4.05565 0.37876 0.21735  
C 3.61446 -0.69864 1.09888  
C 2.68202 -0.15002 2.05413  
C 2.47603 1.24340 1.71717  
C 3.34364 1.56310 0.58260  
Rh 1.70707 0.04372 -0.03448  
B -0.14400 -0.09121 0.59698  
P -1.92035 -0.05920 -0.27555  
C -2.78649 1.59914 -0.06119  
C 4.22112 -2.07401 1.17468  
C 2.13236 -0.85308 3.26354  
C 1.72015 2.24690 2.54575  
C 3.55842 2.93900 0.01254  
C 5.17660 0.30483 -0.78434  
P 1.49980 -1.34047 -1.86863  
C 0.48338 -2.89573 -1.67990  
C 0.77734 -0.56217 -3.40193  
C 3.08155 -2.04546 -2.56318  
C -2.96742 -1.50067 0.34782  
H 2.64717 3.55360 0.07249  
H 3.87197 2.90033 -1.04235  
H 4.35109 3.46699 0.57508  
H 6.12645 0.63575 -0.32414  
H 4.99514 0.95563 -1.65518  
H 5.33976 -0.72012 -1.15110  
H 4.62736 -2.40260 0.20545  
H 3.49304 -2.82750 1.51460  
H 5.06238 -2.08279 1.89290  
H 2.75879 -0.64200 4.15016  
H 2.11125 -1.94535 3.12522  
H 1.10820 -0.52214 3.50011  
H 2.38298 2.68898 3.31284  
H 0.87069 1.78381 3.07193  
H 1.33094 3.07384 1.93108  
H -0.41102 -0.07083 1.78685  
H -1.90918 -0.22885 -1.69891  
H 0.70597 -1.29644 -4.22120

H 1.42700 0.27190 -3.70929  
H -0.22175 -0.15565 -3.18507  
H 2.85849 -2.65319 -3.45565  
H 3.57486 -2.68080 -1.81226  
H 3.75986 -1.22635 -2.84423  
H -0.56156 -2.63041 -1.45767  
H 0.88068 -3.47786 -0.83414  
H 0.51578 -3.50571 -2.59804  
H 0.97821 1.08742 -0.96609  
C -4.17239 1.66236 -0.74531  
H -2.91157 1.69924 1.03530  
C -4.81660 3.05247 -0.54546  
H -4.05192 1.46409 -1.82853  
H -4.84203 0.88003 -0.34797  
C -3.89928 4.18542 -1.03935  
H -5.78811 3.07962 -1.06933  
H -5.03616 3.19683 0.53038  
C -2.51859 4.11342 -0.36227  
H -3.77502 4.10629 -2.13725  
H -4.36874 5.16578 -0.84758  
C -1.85725 2.73366 -0.56306  
H -1.84963 4.89848 -0.75655  
H -2.62790 4.30825 0.72259  
H -1.64968 2.58254 -1.64129  
H -0.88219 2.69314 -0.04659  
C -3.98098 -2.02947 -0.69398  
H -2.21022 -2.29274 0.52465  
C -4.72544 -3.26407 -0.14030  
H -4.71436 -1.23789 -0.93605  
H -3.46733 -2.28497 -1.63907  
C -5.39875 -2.96301 1.21161  
H -5.47124 -3.60377 -0.88013  
H -4.00465 -4.09614 -0.01625  
C -4.38308 -2.42809 2.23774  
H -6.20097 -2.21339 1.06424  
H -5.88950 -3.87154 1.60146  
C -3.63983 -1.18281 1.70592  
H -4.88511 -2.17560 3.18800  
H -3.64287 -3.21772 2.47302  
H -4.36522 -0.35707 1.57489  
H -2.88955 -0.84077 2.44123

TS(11''-9')<sub>1cy</sub>

SCF Energy = -1130.72889739  
Enthalpy 0K = -1130.055693  
Enthalpy 298K = -1130.016778  
Free Energy 298K = -1130.124227  
SCF(DCM) = -1130.77639936  
SCF(BP86-D3) = -0.12509170  
Lowest Frequencies = -39.4603

16.3274 cm<sup>-1</sup>

C -3.64770 -0.64390 0.26232  
C -2.97216 -1.23187 1.35449  
C -1.89457 -2.06680 0.80327  
C -1.95524 -2.05830 -0.63084  
C -2.97075 -1.08100 -0.99214  
Rh -1.46572 0.06234 0.01063  
P -1.84081 2.34832 -0.17863  
C -2.49526 2.93192 -1.82000  
C -3.31603 -1.12455 2.81382  
C -1.01259 -2.92759 1.65987



C -1.24617 -2.96938 -1.59188  
 C -3.49823 -0.86374 -2.37914  
 C -4.93785 0.12097 0.29913  
 B 0.10415 0.40866 -1.43775  
 P 1.47615 0.05035 -0.05250  
 C 2.14482 -1.70968 -0.11492  
 C 3.00481 1.17445 0.17759  
 C -3.07889 3.05530 1.02888  
 C -0.41585 3.51158 0.12028  
 H -4.98596 0.90560 -0.47302  
 H -5.12315 0.58007 1.28232  
 H -5.77816 -0.57021 0.09759  
 H -3.88754 -2.00965 3.15158  
 H -3.93206 -0.23634 3.02332  
 H -2.41447 -1.06338 3.44540  
 H -0.62397 -2.37523 2.53149  
 H -0.16169 -3.34551 1.10241  
 H -1.59747 -3.77835 2.05751  
 H -0.79901 -2.41393 -2.43206  
 H -1.95705 -3.70427 -2.01245  
 H -0.44518 -3.54287 -1.09966  
 H -4.25985 -1.63236 -2.61604  
 H -2.69790 -0.94140 -3.13019  
 H -3.98147 0.11893 -2.49010  
 H 0.20273 -0.48356 -2.25876  
 H 0.91811 0.09478 1.28645  
 H -0.75621 4.55195 -0.00942  
 H 0.39554 3.30031 -0.58960  
 H -0.05120 3.38074 1.15093  
 H -2.59812 4.02947 -1.82523  
 H -3.48123 2.48027 -2.00957  
 H -1.79941 2.61554 -2.61082  
 H -2.72627 2.87467 2.05616  
 H -4.05990 2.57790 0.90196  
 H -3.18576 4.14091 0.86830  
 H 0.28381 1.51732 -1.89935  
 C 2.81023 -2.16139 1.20321  
 H 1.23606 -2.31537 -0.29280  
 C 3.30324 -3.62158 1.09658  
 H 3.67539 -1.50659 1.42672  
 H 2.10720 -2.05418 2.04970  
 C 4.24322 -3.81781 -0.10725  
 H 3.80572 -3.91123 2.03616  
 H 2.42735 -4.29244 0.99019  
 C 3.57663 -3.35893 -1.41683  
 H 5.17220 -3.23654 0.05545  
 H 4.54742 -4.87624 -0.18347  
 C 3.09084 -1.89548 -1.32661  
 H 4.27457 -3.46169 -2.26607  
 H 2.71190 -4.01410 -1.64137  
 H 3.97280 -1.23457 -1.21352  
 H 2.58236 -1.59800 -2.26064  
 C 2.94024 2.05960 1.43967  
 H 3.81927 0.43583 0.32170  
 C 4.24766 2.86622 1.60234  
 H 2.09050 2.76311 1.35531  
 H 2.75817 1.44124 2.33763  
 C 4.56761 3.69107 0.34175  
 H 4.16838 3.52117 2.48801  
 H 5.08087 2.16495 1.80474  
 C 4.61937 2.79993 -0.91267

H 3.79208 4.47084 0.20633  
 H 5.52557 4.22434 0.47061  
 C 3.31365 1.99552 -1.09272  
 H 4.80333 3.40807 -1.81570  
 H 5.47151 2.09685 -0.83002  
 H 2.47682 2.69106 -1.29424  
 H 3.38368 1.33577 -1.97583

INT(11''-9')<sub>cy</sub>

SCF Energy = -1130.75116721  
 Enthalpy 0K = -1130.075282  
 Enthalpy 298K = -1130.036546  
 Free Energy 298K = -1130.141110  
 SCF(DCM) = -1130.79765704  
 SCF(BP86-D3) = -0.13239274  
 Lowest Frequencies = 26.7662  
 28.9552 cm<sup>-1</sup>

C -1.22519 -2.05286 1.14916  
 C -1.90264 -2.23451 -0.12937  
 C -3.03310 -1.35555 -0.15322  
 C -3.08334 -0.63896 1.12209  
 C -1.96270 -1.07483 1.91840  
 Rh -1.15005 0.01018 0.07951  
 P 1.20535 0.09417 -0.50161  
 C 1.97647 1.72351 0.07760  
 C -1.63611 -3.29877 -1.15835  
 C -4.11053 -1.38556 -1.20078  
 C -4.25701 0.13670 1.65355  
 C -1.71832 -0.72614 3.36194  
 C -0.16661 -2.94559 1.72970  
 P -1.94004 1.95024 -0.98620  
 C -3.14399 2.93089 0.05080  
 B 0.09105 0.01516 -2.00795  
 C -0.78234 3.34780 -1.41900  
 C -2.89402 1.72579 -2.56975  
 C 2.33441 -1.39545 -0.13820  
 H -2.11273 0.27004 3.61340  
 H -0.64631 -0.73872 3.61125  
 H -2.22072 -1.45929 4.02014  
 H -0.65353 -3.77867 2.27146  
 H 0.46452 -2.41423 2.45894  
 H 0.48179 -3.39153 0.96349  
 H -0.83040 -3.97903 -0.84533  
 H -1.36336 -2.87535 -2.13980  
 H -2.54277 -3.91288 -1.30518  
 H -4.75165 -2.27472 -1.04977  
 H -3.69469 -1.45278 -2.21830  
 H -4.77074 -0.50600 -1.14949  
 H -4.87963 -0.52822 2.28103  
 H -4.90723 0.51552 0.85045  
 H -3.94896 0.98478 2.28412  
 H -0.10080 -1.06771 -2.49491  
 H -0.59801 1.11540 1.04629  
 H -1.36111 4.10446 -1.97385  
 H 0.05464 3.00749 -2.04221  
 H -0.40120 3.80837 -0.49435  
 H -3.25570 2.70613 -2.92071  
 H -3.75541 1.06484 -2.39850  
 H -2.24143 1.27585 -3.33085  
 H -2.68054 3.17105 1.02018  
 H -4.06915 2.36728 0.22671

|   |          |          |          |   |          |          |          |
|---|----------|----------|----------|---|----------|----------|----------|
| H | -3.39368 | 3.86737  | -0.47426 | C | -2.34589 | -2.03353 | -2.75377 |
| H | -0.06440 | 0.99334  | -2.68548 | C | 1.96446  | 1.75234  | -0.13992 |
| C | 3.11121  | 2.26485  | -0.82704 | H | -3.09775 | 2.84328  | -1.57437 |
| H | 1.11778  | 2.40826  | -0.03282 | H | -2.25739 | 3.61535  | -0.20853 |
| C | 3.53629  | 3.67518  | -0.36022 | H | -4.02640 | 3.42470  | -0.17055 |
| H | 3.98826  | 1.59628  | -0.78926 | H | -3.16893 | 2.98862  | 2.73877  |
| H | 2.77940  | 2.29025  | -1.88046 | H | -1.54238 | 3.27834  | 2.08497  |
| C | 3.94221  | 3.68280  | 1.12504  | H | -1.76336 | 2.15392  | 3.44758  |
| H | 4.36659  | 4.03562  | -0.99272 | H | -1.93122 | -0.05803 | 3.91499  |
| H | 2.69638  | 4.38164  | -0.51460 | H | -2.18088 | -1.66966 | 3.20978  |
| C | 2.80875  | 3.14118  | 2.01595  | H | -3.58201 | -0.69492 | 3.70906  |
| H | 4.84618  | 3.05696  | 1.26079  | H | -4.91261 | -2.01193 | 1.21562  |
| H | 4.21974  | 4.70376  | 1.44053  | H | -3.30024 | -2.73915 | 1.37411  |
| C | 2.35941  | 1.73001  | 1.57659  | H | -4.00975 | -2.46443 | -0.23941 |
| H | 3.12364  | 3.11502  | 3.07419  | H | -5.37403 | 0.71867  | -1.22785 |
| H | 1.94198  | 3.83036  | 1.96477  | H | -4.62216 | -0.79442 | -1.76128 |
| H | 3.18225  | 1.01589  | 1.76715  | H | -4.01432 | 0.77166  | -2.36693 |
| H | 1.49922  | 1.39638  | 2.18646  | H | 0.20877  | 1.70327  | 2.53813  |
| C | 3.84200  | -1.04195 | -0.22163 | H | -0.71239 | 1.02071  | -1.24755 |
| H | 2.11324  | -1.71343 | 0.89764  | H | -0.31021 | -3.93171 | -1.96335 |
| C | 4.70808  | -2.28095 | 0.10210  | H | -1.05376 | -3.59526 | -0.36061 |
| H | 4.07869  | -0.68867 | -1.24352 | H | 0.65641  | -3.17001 | -0.65804 |
| H | 4.10243  | -0.22751 | 0.47270  | H | -2.00000 | -2.75884 | -3.50866 |
| C | 4.38892  | -3.46362 | -0.82742 | H | -2.75873 | -1.15272 | -3.26554 |
| H | 5.77453  | -2.00386 | 0.02767  | H | -3.13208 | -2.50639 | -2.14803 |
| H | 4.53467  | -2.57830 | 1.15517  | H | 1.25766  | -0.75196 | -2.65031 |
| C | 2.88732  | -3.79735 | -0.79425 | H | -0.14305 | -0.29996 | -3.65540 |
| H | 4.68096  | -3.20436 | -1.86377 | H | 0.47685  | -1.98658 | -3.70025 |
| H | 4.98718  | -4.34714 | -0.54413 | H | 0.13070  | -0.35451 | 2.94416  |
| C | 2.02920  | -2.55461 | -1.11399 | C | 3.10135  | -1.21690 | 1.98248  |
| H | 2.65111  | -4.60073 | -1.51454 | H | 1.50565  | -2.13212 | 0.85811  |
| H | 2.62061  | -4.18628 | 0.20931  | C | 3.89115  | -2.52475 | 2.20800  |
| H | 2.24639  | -2.21480 | -2.14392 | H | 3.81286  | -0.37600 | 1.89067  |
| H | 0.95884  | -2.81042 | -1.10036 | H | 2.46335  | -1.00394 | 2.85720  |
|   |          |          |          | C | 4.76513  | -2.87711 | 0.99209  |
|   |          |          |          | H | 4.50978  | -2.42409 | 3.11722  |
|   |          |          |          | H | 3.17894  | -3.35093 | 2.40355  |
|   |          |          |          | C | 3.91833  | -2.95194 | -0.28995 |
|   |          |          |          | H | 5.55079  | -2.10616 | 0.86772  |
|   |          |          |          | H | 5.29000  | -3.83387 | 1.15904  |
|   |          |          |          | C | 3.11551  | -1.65157 | -0.52422 |
|   |          |          |          | H | 4.55588  | -3.15239 | -1.16924 |
|   |          |          |          | H | 3.21334  | -3.80431 | -0.21343 |
|   |          |          |          | H | 3.82394  | -0.82093 | -0.70595 |
|   |          |          |          | H | 2.51130  | -1.75552 | -1.44118 |
|   |          |          |          | C | 2.17835  | 1.80854  | -1.66751 |
|   |          |          |          | H | 1.21302  | 2.52425  | 0.12603  |
|   |          |          |          | C | 2.75741  | 3.17693  | -2.09159 |
|   |          |          |          | H | 2.87957  | 1.00923  | -1.97717 |
|   |          |          |          | H | 1.22145  | 1.62556  | -2.18880 |
|   |          |          |          | C | 4.05699  | 3.50516  | -1.33454 |
|   |          |          |          | H | 2.92938  | 3.18329  | -3.18256 |
|   |          |          |          | H | 2.00491  | 3.96428  | -1.88755 |
|   |          |          |          | C | 3.84255  | 3.43795  | 0.18780  |
|   |          |          |          | H | 4.84511  | 2.78342  | -1.62723 |
|   |          |          |          | H | 4.42594  | 4.50429  | -1.62524 |
|   |          |          |          | C | 3.27360  | 2.06892  | 0.62178  |
|   |          |          |          | H | 4.78887  | 3.62845  | 0.72428  |
|   |          |          |          | H | 3.13986  | 4.23624  | 0.49767  |
|   |          |          |          | H | 4.02470  | 1.28516  | 0.40510  |
|   |          |          |          | H | 3.09992  | 2.05649  | 1.71247  |

TS (11''-6)<sub>2cy</sub>  
SCF Energy = -1130.73614891  
Enthalpy 0K = -1130.062120  
Enthalpy 298K = -1130.023528  
Free Energy 298K = -1130.127501  
SCF(DCM) = -1130.78182223  
SCF(BP86-D3) = -0.13054770  
Lowest Frequencies = -30.6197  
26.5414 cm<sup>-1</sup>

|    |          |          |          |
|----|----------|----------|----------|
| C  | -2.45861 | 1.38116  | 1.53221  |
| C  | -2.68562 | -0.03029 | 1.87655  |
| C  | -3.30670 | -0.65776 | 0.75640  |
| C  | -3.48306 | 0.34960  | -0.29773 |
| C  | -2.94667 | 1.59827  | 0.19541  |
| Rh | -1.25307 | 0.10393  | -0.09963 |
| P  | 1.07942  | 0.20736  | 0.51838  |
| C  | 2.23307  | -1.31191 | 0.69774  |
| C  | -2.57828 | -0.64267 | 3.24643  |
| C  | -3.90026 | -2.04028 | 0.77013  |
| C  | -4.40663 | 0.24616  | -1.48163 |
| C  | -3.08184 | 2.93784  | -0.47810 |
| C  | -2.20270 | 2.50250  | 2.50325  |
| P  | -0.89029 | -1.54391 | -1.69568 |
| C  | 0.30292  | -1.10934 | -3.05604 |
| B  | 0.34793  | 0.56388  | 2.20551  |
| C  | -0.34018 | -3.22838 | -1.11455 |

INT(11''-6)<sub>2cy</sub>  
 SCF Energy = -1130.73896453  
 Enthalpy 0K = -1130.063845  
 Enthalpy 298K = -1130.024888  
 Free Energy 298K = -1130.129878  
 SCF(DCM) = -1130.78504454  
 SCF(BP86-D3) = -0.13101470  
 Lowest Frequencies = 30.1781  
 35.3430 cm<sup>-1</sup>

|    |          |          |          |
|----|----------|----------|----------|
| C  | -2.39961 | -0.54603 | -2.02854 |
| C  | -2.60135 | 0.84111  | -1.58671 |
| C  | -3.28787 | 0.80663  | -0.34005 |
| C  | -3.47886 | -0.59919 | 0.05113  |
| C  | -2.91262 | -1.41917 | -0.98832 |
| Rh | -1.24027 | -0.29672 | 0.06861  |
| P  | 1.08672  | -0.16403 | -0.48680 |
| C  | 1.99857  | 1.51172  | -0.47749 |
| C  | -2.34968 | 2.05743  | -2.43177 |
| C  | -3.91385 | 1.99626  | 0.33309  |
| C  | -4.40410 | -1.10987 | 1.12332  |
| C  | -3.04133 | -2.91365 | -1.10545 |
| C  | -2.29802 | -0.97426 | -3.47192 |
| P  | -0.93422 | 0.61772  | 2.18331  |
| C  | 0.45606  | 0.00579  | 3.25514  |
| B  | 0.23655  | -0.51013 | -2.12500 |
| C  | -0.70153 | 2.46707  | 2.21428  |
| C  | -2.33001 | 0.38319  | 3.39773  |
| C  | 2.18678  | -1.67807 | -0.12982 |
| H  | -3.12167 | -3.39399 | -0.11855 |
| H  | -2.17844 | -3.35360 | -1.62899 |
| H  | -3.94971 | -3.17555 | -1.67994 |
| H  | -3.32808 | -1.01724 | -3.87767 |
| H  | -1.85784 | -1.97507 | -3.58440 |
| H  | -1.72196 | -0.27086 | -4.08773 |
| H  | -1.42012 | 1.96111  | -3.01458 |
| H  | -2.28011 | 2.97423  | -1.82572 |
| H  | -3.17564 | 2.20256  | -3.15354 |
| H  | -4.93925 | 2.14266  | -0.05473 |
| H  | -3.35760 | 2.92479  | 0.13028  |
| H  | -4.00344 | 1.87583  | 1.42318  |
| H  | -5.38129 | -1.36981 | 0.67523  |
| H  | -4.59883 | -0.36278 | 1.90563  |
| H  | -4.01437 | -2.02004 | 1.60564  |
| H  | 0.20311  | -1.65367 | -2.48737 |
| H  | -0.73733 | -1.62104 | 0.73929  |
| H  | -0.62866 | 2.82840  | 3.25348  |
| H  | -1.55761 | 2.94977  | 1.71995  |
| H  | 0.21520  | 2.73415  | 1.66847  |
| H  | -2.02787 | 0.79891  | 4.37313  |
| H  | -2.54281 | -0.69032 | 3.50975  |
| H  | -3.24101 | 0.89782  | 3.06405  |
| H  | 1.42641  | 0.11282  | 2.75419  |
| H  | 0.28941  | -1.05761 | 3.48426  |
| H  | 0.46333  | 0.58180  | 4.19502  |
| H  | 0.02044  | 0.40774  | -2.86433 |
| C  | 2.77888  | 1.76745  | -1.79362 |
| H  | 1.14658  | 2.22175  | -0.44785 |
| C  | 3.35955  | 3.19817  | -1.81538 |
| H  | 3.60646  | 1.03963  | -1.88113 |
| H  | 2.11981  | 1.60751  | -2.66342 |

|   |         |          |          |
|---|---------|----------|----------|
| C | 4.25134 | 3.46890  | -0.59090 |
| H | 3.92724 | 3.34690  | -2.75091 |
| H | 2.52684 | 3.92929  | -1.83503 |
| C | 3.48925 | 3.19769  | 0.71812  |
| H | 5.14552 | 2.81649  | -0.63542 |
| H | 4.62250 | 4.50849  | -0.60722 |
| C | 2.89933 | 1.76958  | 0.75145  |
| H | 4.14848 | 3.34437  | 1.59199  |
| H | 2.66481 | 3.93199  | 0.81984  |
| H | 3.72866 | 1.03641  | 0.76081  |
| H | 2.33920 | 1.62383  | 1.69189  |
| C | 2.51103 | -2.02640 | 1.33570  |
| H | 1.52506 | -2.47341 | -0.52836 |
| C | 3.30183 | -3.35235 | 1.42371  |
| H | 3.11227 | -1.21722 | 1.79475  |
| H | 1.57734 | -2.11605 | 1.91516  |
| C | 4.57917 | -3.31674 | 0.56755  |
| H | 3.54485 | -3.56482 | 2.47999  |
| H | 2.65200 | -4.18078 | 1.07849  |
| C | 4.24946 | -2.96746 | -0.89386 |
| H | 5.27722 | -2.56072 | 0.97836  |
| H | 5.10241 | -4.28734 | 0.62148  |
| C | 3.46926 | -1.63816 | -0.99699 |
| H | 5.17127 | -2.89696 | -1.49794 |
| H | 3.64220 | -3.77900 | -1.34042 |
| H | 4.12183 | -0.81351 | -0.65078 |
| H | 3.21507 | -1.42833 | -2.05100 |

6<sub>cy</sub>(=7)  
 SCF Energy = -1130.76581971  
 Enthalpy 0K = -1130.090191  
 Enthalpy 298K = -1130.051279  
 Free Energy 298K = -1130.156786  
 SCF(DCM) = -1130.81367653  
 SCF(BP86-D3) = -0.13226625  
 Lowest Frequencies = 19.1795  
 30.6876 cm<sup>-1</sup>

|    |          |          |          |
|----|----------|----------|----------|
| C  | -3.09070 | 1.92092  | -1.21443 |
| C  | -2.15889 | 1.48757  | -0.05398 |
| C  | -2.94027 | 1.36681  | 1.27368  |
| C  | -3.64970 | 2.69720  | 1.61071  |
| C  | -4.57384 | 3.14818  | 0.46478  |
| C  | -3.80623 | 3.24491  | -0.86657 |
| P  | -1.07991 | -0.01306 | -0.50666 |
| C  | -2.02940 | -1.63359 | -0.28611 |
| C  | -2.33320 | -2.07697 | 1.16245  |
| C  | -2.96909 | -3.48513 | 1.18492  |
| C  | -4.23494 | -3.54557 | 0.31060  |
| C  | -3.94110 | -3.08218 | -1.12773 |
| C  | -3.31204 | -1.67113 | -1.15586 |
| Rh | 1.32353  | -0.01801 | -0.27609 |
| P  | 1.49034  | 2.31660  | -0.04928 |
| C  | 3.21586  | 3.01227  | -0.15770 |
| C  | 2.99806  | -0.54164 | 1.16698  |
| C  | 3.49962  | -0.69525 | -0.19608 |
| C  | 2.71727  | -1.73387 | -0.82451 |
| C  | 1.75104  | -2.23023 | 0.13405  |
| C  | 1.92353  | -1.48488 | 1.37176  |
| C  | 3.65330  | 0.23269  | 2.27560  |
| C  | 4.75071  | -0.08783 | -0.76915 |
| C  | 2.93428  | -2.28961 | -2.20253 |

C 0.94430 -3.48283 -0.04962  
 C 1.30991 -1.79890 2.70777  
 B -0.20217 0.05562 -2.21674  
 C 0.90395 3.04213 1.56454  
 C 0.68478 3.36685 -1.36098  
 H 4.35671 -0.43137 2.81240  
 H 2.92371 0.59333 3.01688  
 H 4.24076 1.08854 1.91278  
 H 5.04437 0.83422 -0.24739  
 H 4.64346 0.14517 -1.84047  
 H 5.59206 -0.79893 -0.67141  
 H 3.56714 -3.19473 -2.14751  
 H 3.44097 -1.56692 -2.85959  
 H 1.98451 -2.57475 -2.68113  
 H 0.56224 -3.58120 -1.07795  
 H 0.09602 -3.54229 0.64752  
 H 1.58763 -4.36260 0.14143  
 H 0.39070 -2.39383 2.61009  
 H 1.06635 -0.88781 3.27573  
 H 2.02012 -2.38917 3.31730  
 H 1.13228 0.31577 -1.93711  
 H -0.18931 -1.00758 -2.79214  
 H -0.35894 1.06561 -2.86182  
 H -1.31356 -2.35068 -0.73069  
 H -1.41442 -2.05411 1.77365  
 H -3.03324 -1.36438 1.63340  
 H -3.20180 -3.76935 2.22664  
 H -2.23529 -4.22849 0.81346  
 H -5.01484 -2.89475 0.75290  
 H -4.64816 -4.56933 0.30693  
 H -4.86518 -3.08223 -1.73252  
 H -3.24867 -3.79737 -1.61392  
 H -3.08361 -1.37353 -2.19397  
 H -4.04802 -0.94532 -0.76153  
 H -1.41240 2.29211 0.08347  
 H -3.70594 0.57429 1.18001  
 H -2.26933 1.06613 2.09938  
 H -4.22031 2.58375 2.54942  
 H -2.88879 3.48090 1.80073  
 H -5.40074 2.41911 0.35657  
 H -5.04194 4.11773 0.70908  
 H -3.05593 4.05842 -0.79927  
 H -4.48900 3.51978 -1.68987  
 H -2.51552 2.02366 -2.15117  
 H -3.84587 1.13483 -1.39653  
 H 1.02449 4.13793 1.56297  
 H 1.50259 2.61325 2.38311  
 H -0.15160 2.78700 1.73673  
 H -0.39233 3.17476 -1.44726  
 H 1.15279 3.12951 -2.32878  
 H 0.85059 4.43015 -1.12277  
 H 3.66479 2.73464 -1.12287  
 H 3.84253 2.62868 0.65894  
 H 3.17010 4.11124 -0.08265

TS (11''-6)<sub>3cy</sub>  
 SCF Energy = -1130.69999668  
 Enthalpy 0K = -1130.030847  
 Enthalpy 298K = -1129.991383  
 Free Energy 298K = -1130.101135  
 SCF (DCM) = -1130.74634928

SCF(BP86-D3) = -0.12126533  
 Lowest Frequencies = -791.7445  
 13.0716 cm-1  
 C -3.94281 0.05313 0.30202  
 C -3.23227 0.83202 -0.71219  
 C -2.36287 1.78496 -0.03351  
 C -2.43115 1.48805 1.38051  
 C -3.42295 0.42574 1.57239  
 Rh -1.54567 -0.26958 0.27110  
 B 0.23137 -0.05507 1.39315  
 P 1.62005 -0.10344 0.02577  
 C 3.35392 -0.82879 0.48915  
 C -3.58381 0.88104 -2.17451  
 C -1.69925 2.97014 -0.67437  
 C -1.83183 2.30271 2.49206  
 C -3.86363 -0.10821 2.90440  
 C -5.10111 -0.87509 0.06516  
 P -1.32347 -2.10666 -1.19279  
 C -0.86304 -1.75626 -2.96261  
 C -0.05001 -3.35216 -0.66241  
 C -2.83267 -3.18461 -1.38762  
 C 1.94085 1.71401 -0.42370  
 H -3.03516 -0.13012 3.62958  
 H -4.27575 -1.12585 2.82166  
 H -4.65526 0.53497 3.33290  
 H -6.05103 -0.36286 0.30654  
 H -5.05274 -1.77782 0.69566  
 H -5.17057 -1.19339 -0.98567  
 H -3.88357 -0.10479 -2.56472  
 H -2.74763 1.25312 -2.78645  
 H -4.43849 1.56474 -2.33566  
 H -2.43622 3.78420 -0.81407  
 H -1.28715 2.72669 -1.66640  
 H -0.88442 3.36838 -0.05139  
 H -2.56042 3.05862 2.83936  
 H -0.92439 2.83479 2.16762  
 H -1.56246 1.67918 3.35866  
 H 0.34118 0.40856 2.49966  
 H 0.17710 -0.35460 -0.73832  
 H 0.03537 -4.15535 -1.41190  
 H -0.34577 -3.78085 0.30753  
 H 0.92610 -2.85319 -0.55266  
 H -2.58278 -4.06195 -2.00678  
 H -3.64274 -2.62404 -1.87678  
 H -3.17832 -3.52244 -0.39910  
 H 0.12733 -1.27693 -2.98935  
 H -1.60157 -1.06893 -3.40200  
 H -0.83784 -2.68910 -3.54873  
 H -0.59506 -1.13899 1.42374  
 C 3.99658 -1.59518 -0.68631  
 H 3.97269 0.06072 0.72408  
 C 5.37974 -2.15351 -0.28530  
 H 3.33614 -2.43703 -0.97801  
 H 4.08776 -0.94687 -1.57596  
 C 5.28900 -3.03709 0.97264  
 H 5.80979 -2.72107 -1.12967  
 H 6.06887 -1.30774 -0.09290  
 C 4.63042 -2.28119 2.14147  
 H 4.69427 -3.94286 0.74032  
 H 6.29340 -3.39032 1.26480  
 C 3.24832 -1.71377 1.74812

H 4.52183 -2.94129 3.02049  
H 5.28651 -1.44631 2.45679  
H 2.55533 -2.55598 1.54614  
H 2.81641 -1.14229 2.58939  
C 2.85169 1.82538 -1.66996  
H 0.93459 2.08543 -0.69627  
C 3.03032 3.29934 -2.09313  
H 3.84708 1.39904 -1.43784  
H 2.43792 1.23161 -2.50568  
C 3.57234 4.15552 -0.93395  
H 3.70441 3.35446 -2.96628  
H 2.05334 3.70347 -2.42519  
C 2.67359 4.04091 0.31064  
H 4.59583 3.81752 -0.67787  
H 3.66117 5.21090 -1.24596  
C 2.48052 2.57033 0.74464  
H 3.09498 4.62173 1.15022  
H 1.68347 4.48711 0.08788  
H 3.45558 2.16826 1.08291  
H 1.80133 2.51304 1.61401

INT(11''-6)<sub>cy</sub>  
SCF Energy = -1130.74035842  
Enthalpy 0K = -1130.067556  
Enthalpy 298K = -1130.028162  
Free Energy 298K = -1130.137539  
SCF(DCM) = -1130.78809185  
SCF(BP86-D3) = -0.11825769  
Lowest Frequencies = 14.0849  
20.2913 cm<sup>-1</sup>

C -3.84997 -1.00307 -0.32379  
C -3.81811 -0.13758 0.85636  
C -2.92688 -0.73152 1.82053  
C -2.41010 -1.97372 1.25358  
C -3.00043 -2.14662 -0.05226  
Rh -1.75088 -0.23208 -0.04741  
B 0.38081 -0.79194 -0.10190  
P 2.06663 -0.11416 -0.70219  
C 3.38285 -1.37113 -0.12670  
C -4.72433 1.03107 1.12757  
C -2.67857 -0.23753 3.21617  
C -1.54961 -2.97075 1.97313  
C -2.81179 -3.33350 -0.95093  
C -4.78846 -0.88431 -1.49143  
P -1.70748 1.81274 -1.18792  
C -1.40246 3.31308 -0.12759  
C -0.44602 1.94848 -2.54578  
C -3.24943 2.30622 -2.10986  
C 2.39885 1.58356 0.11639  
H -1.80648 -3.76968 -0.84649  
H -2.96733 -3.07530 -2.00948  
H -3.54280 -4.12150 -0.69035  
H -5.68843 -1.50327 -1.31758  
H -4.32513 -1.23511 -2.42713  
H -5.13011 0.14941 -1.64557  
H -5.11093 1.48609 0.20336  
H -4.22804 1.81485 1.72116  
H -5.60219 0.69021 1.70738  
H -3.40938 -0.69403 3.91043  
H -2.79052 0.85479 3.29246  
H -1.67332 -0.50627 3.57453

H -2.18365 -3.66627 2.55325  
H -0.85832 -2.48252 2.67725  
H -0.94983 -3.57185 1.27323  
H 0.44913 -1.93770 0.26641  
H -0.20136 0.16356 0.67547  
H -0.44167 2.97106 -2.95704  
H -0.71033 1.23420 -3.34137  
H 0.55834 1.68995 -2.17781  
H -3.07342 3.26799 -2.61926  
H -4.09390 2.42316 -1.41552  
H -3.49809 1.54201 -2.86154  
H -0.44060 3.20968 0.39644  
H -2.20324 3.39702 0.62331  
H -1.38736 4.22499 -0.74718  
H -0.56533 -0.74854 -1.16161  
C 4.82143 -0.88994 -0.42449  
H 3.26484 -1.49920 0.96752  
C 5.86156 -1.94791 0.00554  
H 4.92095 -0.69417 -1.51054  
H 5.03233 0.06323 0.09048  
C 5.59889 -3.31021 -0.65985  
H 6.87646 -1.58582 -0.23767  
H 5.82630 -2.06368 1.10697  
C 4.16031 -3.78717 -0.38997  
H 5.75387 -3.21958 -1.75300  
H 6.32667 -4.05928 -0.30091  
C 3.12379 -2.72840 -0.82291  
H 3.96004 -4.73706 -0.91749  
H 4.03762 -3.99610 0.69132  
H 3.18388 -2.58394 -1.92013  
H 2.10300 -3.08925 -0.60632  
C 3.38122 2.46084 -0.69422  
H 1.40068 2.06681 0.07380  
C 3.54651 3.85491 -0.05226  
H 4.36779 1.96403 -0.74270  
H 3.03401 2.55470 -1.73908  
C 3.97195 3.75200 1.42382  
H 4.28067 4.44531 -0.62867  
H 2.58501 4.40363 -0.11774  
C 2.98058 2.89160 2.22798  
H 4.98097 3.29883 1.48262  
H 4.05534 4.75824 1.87105  
C 2.80527 1.48767 1.60580  
H 3.31285 2.79113 3.27697  
H 1.99632 3.40157 2.25987  
H 3.75944 0.93534 1.69501  
H 2.05115 0.90672 2.16762

TS(11''-6)<sub>4cy</sub>  
SCF Energy = -1130.71540820  
Enthalpy 0K = -1130.044491  
Enthalpy 298K = -1130.004783  
Free Energy 298K = -1130.115692  
SCF(DCM) = -1130.76289508  
SCF(BP86-D3) = -0.11757248  
Lowest Frequencies = -133.5210  
11.3184 cm<sup>-1</sup>

C -3.84697 -0.47552 0.47314  
C -3.68699 0.54554 -0.57044  
C -3.03484 1.67669 0.02737  
C -2.80085 1.38361 1.44076

C -3.30829 0.06608 1.71489  
 Rh -1.68531 -0.16442 0.17639  
 B 0.34514 -0.03574 1.48035  
 P 1.73112 0.00891 0.17475  
 C 3.36969 -0.88035 0.55246  
 C -4.30261 0.52343 -1.94212  
 C -2.72276 2.97634 -0.65174  
 C -2.25656 2.34639 2.45488  
 C -3.34165 -0.60413 3.05685  
 C -4.66960 -1.72534 0.37232  
 P -1.06749 -1.71762 -1.47170  
 C -0.24722 -1.03147 -2.99734  
 C 0.06908 -3.08380 -0.92170  
 C -2.44391 -2.73001 -2.22122  
 C 2.12168 1.80165 -0.30849  
 H -2.45412 -0.35019 3.65770  
 H -3.38952 -1.69982 2.96472  
 H -4.23238 -0.27650 3.62468  
 H -5.69142 -1.52441 0.74698  
 H -4.25416 -2.54231 0.98345  
 H -4.76731 -2.07821 -0.66420  
 H -4.51369 -0.49946 -2.28656  
 H -3.66284 1.01523 -2.69191  
 H -5.26732 1.06372 -1.92873  
 H -3.55248 3.69249 -0.49629  
 H -2.59516 2.85092 -1.73791  
 H -1.81156 3.44303 -0.24638  
 H -3.08303 2.93891 2.88928  
 H -1.54102 3.05450 2.00897  
 H -1.74776 1.82564 3.28009  
 H 0.48823 -0.44905 2.60776  
 H -0.13014 1.08655 1.33924  
 H 0.32249 -3.73246 -1.77581  
 H -0.43828 -3.67810 -0.14603  
 H 0.99003 -2.65571 -0.50136  
 H -2.01745 -3.43954 -2.94921  
 H -3.16343 -2.08162 -2.74207  
 H -2.96375 -3.29601 -1.43422  
 H 0.70217 -0.56480 -2.69591  
 H -0.89537 -0.26516 -3.45088  
 H -0.06261 -1.83523 -3.72982  
 H -0.60790 -1.02631 1.15292  
 C 3.95577 -1.62380 -0.67328  
 H 4.06363 -0.05628 0.81939  
 C 5.31122 -2.27686 -0.33021  
 C 3.24510 -2.41157 -0.99341  
 H 4.06548 -0.93539 -1.52990  
 C 5.19116 -3.21874 0.88196  
 H 5.69517 -2.82180 -1.21098  
 H 6.05038 -1.48231 -0.10704  
 C 4.59769 -2.48602 2.09904  
 H 4.54002 -4.07528 0.61619  
 H 6.17795 -3.64404 1.13600  
 C 3.24170 -1.82305 1.76862  
 H 4.46936 -3.18097 2.94806  
 H 5.30624 -1.70519 2.43862  
 H 2.49638 -2.61342 1.54596  
 H 2.85990 -1.27191 2.64472  
 C 2.97840 1.91265 -1.58961  
 H 1.11589 2.21862 -0.51832  
 C 3.20950 3.38819 -1.98219

H 3.96097 1.43196 -1.41556  
 H 2.50101 1.36418 -2.42218  
 C 3.83731 4.18884 -0.82677  
 H 3.84837 3.43695 -2.88181  
 H 2.23909 3.84519 -2.26141  
 C 2.98639 4.07788 0.45081  
 H 4.85506 3.80123 -0.62364  
 H 3.95849 5.24767 -1.11576  
 C 2.75110 2.60527 0.85708  
 H 3.46602 4.61648 1.28766  
 H 2.00662 4.56815 0.28279  
 H 3.72179 2.15117 1.13648  
 H 2.10474 2.54799 1.75021

TS(11''-9')<sub>2cy</sub>

SCF Energy = -1130.72886015  
 Enthalpy 0K = -1130.055086  
 Enthalpy 298K = -1130.016465  
 Free Energy 298K = -1130.122235  
 SCF(DCM) = -1130.77528615  
 SCF(BP86-D3) = -0.12789587  
 Lowest Frequencies = -116.1963

20.1801 cm-1  
 C 1.45072 1.85345 1.39686  
 C 2.34378 1.96928 0.28825  
 C 3.31815 0.88691 0.38362  
 C 3.01789 0.08433 1.53093  
 C 1.81295 0.64267 2.14904  
 Rh 1.13777 -0.10057 0.25626  
 P -1.09347 -0.06109 -0.25866  
 C -2.14502 -1.47504 0.43278  
 C 2.43351 3.09975 -0.69961  
 C 4.54708 0.81100 -0.47668  
 C 3.87249 -1.00065 2.12850  
 C 1.27435 0.26361 3.50041  
 C 0.44905 2.87247 1.85724  
 P 1.39049 -1.92777 -1.88205  
 C 3.17234 -2.20343 -1.38738  
 B -0.18690 -0.52097 -1.91981  
 C 0.65177 -3.57729 -1.45285  
 C 1.61234 -1.98847 -3.73847  
 C -2.04179 1.58436 -0.32483  
 H 1.38950 -0.81349 3.69467  
 H 0.20686 0.51354 3.59928  
 H 1.81976 0.80865 4.29424  
 H 0.94108 3.58108 2.54997  
 H -0.38579 2.41191 2.40801  
 H 0.03559 3.46260 1.02560  
 H 1.54199 3.74392 -0.67077  
 H 2.55622 2.73832 -1.73409  
 H 3.30607 3.74109 -0.47359  
 H 5.23103 1.63797 -0.20706  
 H 4.31807 0.93366 -1.54885  
 H 5.10434 -0.12672 -0.33620  
 H 4.54295 -0.57548 2.89847  
 H 4.51304 -1.48842 1.37711  
 H 3.26535 -1.77965 2.61512  
 H 0.10040 0.37206 -2.67121  
 H 0.78845 -1.53906 0.80408  
 H 1.27208 -4.37268 -1.89560  
 H -0.37234 -3.65059 -1.84587

|   |          |          |          |   |          |          |          |
|---|----------|----------|----------|---|----------|----------|----------|
| H | 0.63692  | -3.69597 | -0.35928 | C | 3.40247  | -1.45618 | 2.58292  |
| H | 2.23691  | -2.85378 | -4.01196 | C | 1.67213  | 1.18359  | 3.21208  |
| H | 2.10918  | -1.06366 | -4.07111 | B | -1.02999 | -1.25673 | -1.91282 |
| H | 0.63234  | -2.05825 | -4.23111 | P | -0.57280 | -3.13781 | -1.66414 |
| H | 3.23676  | -2.34932 | -0.30174 | C | 1.24151  | -3.46881 | -1.53591 |
| H | 3.78101  | -1.34032 | -1.68613 | C | -1.32960 | -4.06303 | -0.25068 |
| H | 3.53783  | -3.10109 | -1.91501 | C | -1.11863 | -4.05313 | -3.17694 |
| H | -0.78146 | -1.45286 | -2.42056 | C | -1.57755 | 1.63802  | -1.18583 |
| C | -3.27805 | -1.99014 | -0.48591 | H | 3.62608  | -2.40944 | 2.07952  |
| H | -1.37801 | -2.27231 | 0.50132  | H | 2.57934  | -1.63556 | 3.29122  |
| C | -3.93568 | -3.24492 | 0.13110  | H | 4.29467  | -1.17277 | 3.17119  |
| H | -4.04924 | -1.21165 | -0.61780 | H | 2.42123  | 1.75261  | 3.79674  |
| H | -2.88356 | -2.21687 | -1.49280 | H | 1.40241  | 0.29079  | 3.79628  |
| C | -4.45265 | -2.96860 | 1.55532  | H | 0.77713  | 1.81708  | 3.11355  |
| H | -4.75818 | -3.58760 | -0.52132 | H | 1.01802  | 3.31624  | 1.34300  |
| H | -3.19545 | -4.06919 | 0.16284  | H | 1.68782  | 3.53535  | -0.29501 |
| C | -3.32779 | -2.44312 | 2.46613  | H | 2.71110  | 3.81142  | 1.13501  |
| H | -5.26778 | -2.21970 | 1.50927  | H | 4.55851  | 1.87545  | -1.63826 |
| H | -4.89463 | -3.88410 | 1.98595  | H | 2.90520  | 2.47539  | -1.91632 |
| C | -2.64472 | -1.19258 | 1.86930  | H | 3.35727  | 0.82852  | -2.42306 |
| H | -3.71950 | -2.20642 | 3.47126  | H | 5.43364  | -0.88568 | -0.46744 |
| H | -2.56685 | -3.23672 | 2.60446  | H | 4.09319  | -1.28864 | -1.55686 |
| H | -3.36910 | -0.35538 | 1.85826  | H | 4.34386  | -2.23005 | -0.05655 |
| H | -1.79960 | -0.87834 | 2.50894  | H | -0.28213 | -0.91524 | -2.80758 |
| C | -3.55751 | 1.45312  | -0.61221 | H | 0.53192  | -1.44171 | 1.06503  |
| H | -1.92421 | 2.01019  | 0.69162  | H | -1.08639 | -5.13461 | -0.32815 |
| C | -4.23545 | 2.84237  | -0.57945 | H | -2.42305 | -3.93753 | -0.27044 |
| H | -3.70545 | 0.99322  | -1.60807 | H | -0.93491 | -3.66802 | 0.69822  |
| H | -4.04466 | 0.79481  | 0.12573  | H | -0.81057 | -5.10911 | -3.12517 |
| C | -3.57638 | 3.83136  | -1.55634 | H | -0.67087 | -3.57908 | -4.06377 |
| H | -5.30955 | 2.72689  | -0.80861 | H | -2.21431 | -3.99072 | -3.26086 |
| H | -4.17740 | 3.24694  | 0.45040  | H | 1.62688  | -2.93933 | -0.64713 |
| C | -2.06246 | 3.93749  | -1.29777 | H | 1.73732  | -3.07386 | -2.43626 |
| H | -3.74392 | 3.48742  | -2.59575 | H | 1.44098  | -4.54850 | -1.44819 |
| H | -4.05168 | 4.82439  | -1.47403 | H | -2.19223 | -1.26335 | -2.27995 |
| C | -1.39148 | 2.54845  | -1.34305 | C | -0.60151 | 2.10279  | -2.28996 |
| H | -1.58714 | 4.60129  | -2.04184 | H | -2.52827 | 1.33388  | -1.66947 |
| H | -1.89136 | 4.40217  | -0.30574 | C | -1.11751 | 3.36822  | -3.00752 |
| H | -1.50663 | 2.12364  | -2.35747 | H | 0.38351  | 2.31439  | -1.82773 |
| H | -0.30547 | 2.62907  | -1.16474 | H | -0.43725 | 1.29586  | -3.02396 |

9'<sub>cy</sub>

SCF Energy = -1130.74658001  
 Enthalpy 0K = -1130.073670  
 Enthalpy 298K = -1130.033758  
 Free Energy 298K = -1130.143868  
 SCF(DCM) = -1130.79494368  
 SCF(BP86-D3) = -0.12384370  
 Lowest Frequencies = 17.0360  
 28.2712 cm<sup>-1</sup>

|    |          |          |          |   |          |          |          |
|----|----------|----------|----------|---|----------|----------|----------|
| C  | 2.24496  | 0.81726  | 1.87734  | H | -2.61764 | 2.46262  | 0.56077  |
| C  | 2.36402  | 1.73916  | 0.72061  | C | -3.74878 | -0.36898 | 0.32391  |
| C  | 3.09430  | 1.06387  | -0.28467 | H | -2.09075 | -1.61564 | 0.93705  |
| C  | 3.51457  | -0.25069 | 0.25329  | C | -4.76149 | -0.99864 | 1.30607  |
| C  | 3.06403  | -0.37036 | 1.59996  | H | -3.98605 | 0.70625  | 0.21365  |
| Rh | 1.23945  | -0.22551 | 0.32798  | H | -3.85256 | -0.82189 | -0.67814 |
| P  | -0.96104 | 0.03067  | -0.37248 | C | -4.61756 | -0.40727 | 2.72028  |
| C  | -2.30547 | -0.53156 | 0.85196  | H | -5.78782 | -0.85117 | 0.92570  |
| C  | 1.91191  | 3.16915  | 0.71838  | H | -4.59687 | -2.09401 | 1.34800  |
| C  | 3.49045  | 1.58739  | -1.63437 | C | -3.17538 | -0.55217 | 3.24161  |
| C  | 4.37947  | -1.22112 | -0.49455 | H | -4.89181 | 0.66586  | 2.69582  |

H -5.32597 -0.89450 3.41318  
 C -2.15090 0.06911 2.26765  
 H -3.07414 -0.08440 4.23730  
 H -2.94126 -1.62744 3.37539  
 H -2.30425 1.16422 2.23020  
 H -1.12076 -0.09918 2.62885

TS (9'-9)<sub>cy</sub>

SCF Energy = -1130.74552875  
 Enthalpy 0K = -1130.072249  
 Enthalpy 298K = -1130.033230  
 Free Energy 298K = -1130.140632  
 SCF(DCM) = -1130.79289180  
 SCF(BP86-D3) = -0.11984307  
 Lowest Frequencies = -104.5029  
 26.0772 cm<sup>-1</sup>

C -2.98285 1.27591 0.19770  
 C -2.99738 0.12661 1.12772  
 C -3.32734 -1.02219 0.37074  
 C -3.61797 -0.60749 -1.02151  
 C -3.48574 0.81052 -1.10737  
 Rh -1.48400 0.02400 -0.63207  
 P 0.75855 0.15533 -0.06605  
 C 1.81930 1.50260 -0.87797  
 C -2.82979 0.22243 2.61646  
 C -3.45418 -2.43273 0.86805  
 C -4.09001 -1.53572 -2.10296  
 C -3.84783 1.68882 -2.27231  
 C -2.81778 2.70871 0.60804  
 B 0.82664 -1.51590 -1.14501  
 P 2.42208 -2.62603 -1.31708  
 C 3.68421 -1.92465 -2.47424  
 C 3.35741 -3.07723 0.21523  
 C 1.93788 -4.24088 -2.07904  
 C 1.38857 -0.07992 1.70890  
 H -3.74712 1.15756 -3.23088  
 H -3.21380 2.58727 -2.31768  
 H -4.89771 2.02335 -2.18034  
 H -3.76914 3.09873 1.01893  
 H -2.53663 3.34408 -0.24515  
 H -2.04702 2.81812 1.38674  
 H -2.07863 0.97541 2.90074  
 H -2.53694 -0.73994 3.06384  
 H -3.78632 0.52424 3.08393  
 H -4.51925 -2.70182 0.99731  
 H -2.95467 -2.57255 1.83875  
 H -3.02428 -3.15448 0.15399  
 H -5.16113 -1.77662 -1.96546  
 H -3.53742 -2.48918 -2.09055  
 H -3.97455 -1.08867 -3.10190  
 H 0.62805 -1.22337 -2.31033  
 H -0.88498 0.82173 -1.85391  
 H 4.21886 -3.71454 -0.03944  
 H 2.69363 -3.62078 0.90453  
 H 3.71281 -2.16083 0.71036  
 H 2.82465 -4.86556 -2.26940  
 H 1.41465 -4.04424 -3.02734  
 H 1.25195 -4.76940 -1.39962  
 H 4.08193 -0.98060 -2.07255  
 H 3.20079 -1.72181 -3.44220  
 H 4.51138 -2.63750 -2.61773

H -0.03085 -2.28334 -0.72473  
 C 0.74688 -1.31857 2.37164  
 H 2.47973 -0.25977 1.61210  
 C 1.28539 -1.53504 3.80222  
 H -0.35018 -1.17682 2.40392  
 H 0.91916 -2.22052 1.75749  
 C 1.10306 -0.28046 4.67637  
 H 0.78272 -2.40495 4.26204  
 H 2.36300 -1.78880 3.75091  
 C 1.73757 0.95552 4.01400  
 H 0.02153 -0.09708 4.83226  
 H 1.53837 -0.44576 5.67749  
 C 1.19298 1.17893 2.58695  
 H 1.56037 1.85827 4.62511  
 H 2.83650 0.82283 3.96504  
 H 0.11350 1.42165 2.63807  
 H 1.68687 2.05401 2.12996  
 C 3.30411 1.49126 -0.44913  
 H 1.75808 1.21532 -1.94754  
 C 4.12463 2.50148 -1.28146  
 H 3.38351 1.76526 0.62038  
 H 3.73796 0.47706 -0.54101  
 C 3.53590 3.92064 -1.17565  
 H 5.17742 2.49265 -0.94693  
 H 4.12692 2.18240 -2.34270  
 C 2.04713 3.93949 -1.56973  
 H 3.64355 4.28151 -0.13369  
 H 4.11022 4.61916 -1.80908  
 C 1.22536 2.92500 -0.74628  
 H 1.62637 4.95250 -1.44017  
 H 1.94847 3.69420 -2.64591  
 H 1.22565 3.23418 0.31708  
 H 0.17227 2.91926 -1.07764

9<sub>cy</sub>

SCF Energy = -1130.76599419  
 Enthalpy 0K = -1130.092447  
 Enthalpy 298K = -1130.052954  
 Free Energy 298K = -1130.161515  
 SCF(DCM) = -1130.81231420  
 SCF(BP86-D3) = -0.12191109  
 Lowest Frequencies = 19.4915  
 31.9060 cm<sup>-1</sup>

C 2.48685 0.54804 1.89281  
 C 2.44364 1.63070 0.90564  
 C 3.12633 1.19118 -0.27337  
 C 3.63668 -0.15805 -0.01919  
 C 3.28548 -0.53562 1.32236  
 Rh 1.36827 -0.26877 0.20814  
 P -0.88229 0.15980 -0.07956  
 C -1.45234 1.92678 -0.48315  
 C 1.89643 3.00597 1.16720  
 C 3.41881 2.00138 -1.50636  
 C 4.51116 -0.94055 -0.95922  
 C 3.74748 -1.76763 2.05138  
 C 2.05607 0.65707 3.32977  
 B -0.15606 -0.82667 -1.59760  
 P -0.67897 -2.65627 -2.04628  
 C 0.61860 -3.42643 -3.11631  
 C -0.89290 -3.82629 -0.63283  
 C -2.23049 -2.72442 -3.04861



C -2.07470 -0.67340 1.13889  
 H 1.83570 -0.33074 3.76250  
 H 1.15552 1.28153 3.43802  
 H 2.85545 1.11846 3.94004  
 H 2.66914 3.62993 1.65431  
 H 1.02673 2.98209 1.84279  
 H 1.59943 3.51967 0.24016  
 H 2.72050 2.84502 -1.61992  
 H 3.36236 1.39136 -2.42239  
 H 4.43929 2.42540 -1.45799  
 H 5.56724 -0.63274 -0.84442  
 H 4.23504 -0.77171 -2.01209  
 H 4.46013 -2.02196 -0.75820  
 H 4.71115 -1.57168 2.55708  
 H 3.89897 -2.61509 1.36497  
 H 3.02506 -2.08074 2.82030  
 H 1.12750 -1.07998 -1.32595  
 H 0.78032 -1.55524 0.91751  
 H -2.46606 -3.76490 -3.32111  
 H -2.08851 -2.12758 -3.96278  
 H -3.06418 -2.29608 -2.47241  
 H 0.30752 -4.43281 -3.43731  
 H 1.55841 -3.49596 -2.54730  
 H 0.78185 -2.79119 -4.00042  
 H -1.79275 -3.55776 -0.05959  
 H -0.01202 -3.74070 0.02267  
 H -0.98889 -4.85940 -1.00155  
 H -0.15742 -0.21986 -2.64394  
 C -2.96692 2.09471 -0.74613  
 H -1.19494 2.49258 0.43600  
 C -3.32044 3.57921 -0.99479  
 H -3.25525 1.49058 -1.62862  
 H -3.55700 1.72202 0.10738  
 C -2.48687 4.19291 -2.13313  
 H -4.39979 3.66554 -1.21271  
 H -3.14432 4.15026 -0.06183  
 C -0.98046 4.00505 -1.87725  
 H -2.75588 3.70455 -3.09045  
 H -2.72844 5.26398 -2.24878  
 C -0.63624 2.51731 -1.65526  
 H -0.39122 4.39838 -2.72483  
 H -0.68169 4.59158 -0.98557  
 H -0.87077 1.95363 -2.57786  
 H 0.44514 2.38428 -1.47700  
 C -3.44733 -1.13093 0.59302  
 H -1.49230 -1.57540 1.41211  
 C -4.23358 -1.89880 1.67981  
 H -4.04287 -0.26073 0.26622  
 H -3.31605 -1.76850 -0.30086  
 C -4.40215 -1.05415 2.95649  
 H -5.21794 -2.20147 1.28061  
 H -3.69376 -2.83431 1.93046  
 C -3.03958 -0.58196 3.49551  
 H -5.03393 -0.17259 2.73050  
 H -4.93916 -1.63318 3.72792  
 C -2.23410 0.18007 2.42077  
 H -3.17532 0.06229 4.38215  
 H -2.45229 -1.45927 3.83144  
 H -2.75988 1.12372 2.17751  
 H -1.23937 0.45678 2.81410

$\text{H}_2\text{BP}^t\text{Bu}_2$   
 SCF Energy = -348.292407166  
 Enthalpy 0K = -348.032539  
 Enthalpy 298K = -348.016916  
 Free Energy 298K = -348.071547  
 SCF(DCM) = -348.111651907  
 SCF(BP86-D3) = -0.03465588  
 Lowest Frequencies = 56.7318  
 76.7858 cm<sup>-1</sup>  
 C 1.62904 -0.24656 0.00773  
 P -0.00233 0.70846 -0.37423  
 C -1.63937 -0.23183 0.00806  
 B 0.04860 2.48537 0.06830  
 H -0.96801 3.12396 0.11785  
 H 1.11716 3.03827 0.11153  
 C 1.55626 -1.69727 -0.51331  
 C 2.73757 0.50504 -0.76480  
 C 1.95625 -0.23554 1.51707  
 C -1.91250 -1.26373 -1.11079  
 C -1.60433 -0.93011 1.38319  
 C -2.76595 0.82377 -0.00394  
 H 3.71117 0.01803 -0.56685  
 H 2.55965 0.48640 -1.85290  
 H 2.81691 1.55750 -0.44904  
 H 2.54157 -2.18219 -0.37820  
 H 0.81846 -2.30648 0.03503  
 H 1.30918 -1.73520 -1.58767  
 H 2.91686 -0.75747 1.69569  
 H 2.05100 0.79571 1.89301  
 H 1.18358 -0.74548 2.11414  
 H -2.88137 -1.76451 -0.92337  
 H -1.96596 -0.77767 -2.09912  
 H -1.13868 -2.04601 -1.15790  
 H -2.57810 -1.42198 1.57257  
 H -0.82965 -1.71274 1.43241  
 H -1.42111 -0.21068 2.19789  
 H -3.73949 0.30767 0.09352  
 H -2.66985 1.53741 0.82918  
 H -2.78317 1.39899 -0.94506

$^{10}\text{Me}$   
 SCF Energy = -780.538917299  
 Enthalpy 0K = -780.059700  
 Enthalpy 298K = -780.025917  
 Free Energy 298K = -780.122313  
 SCF(DCM) = -780.587899821  
 SCF(BP86-D3) = -0.08636568  
 Lowest Frequencies = 22.4371  
 29.9027 cm<sup>-1</sup>  
 C -2.38129 -0.90854 -0.32157  
 C -2.13757 -0.63393 1.10392  
 C -1.03344 -1.42741 1.53034  
 C -0.60480 -2.24471 0.38595  
 C -1.46838 -1.97142 -0.72449  
 Rh -0.36861 -0.04982 -0.24487  
 P -0.56530 2.25734 -0.06692  
 C -0.59354 2.92170 1.67230  
 C -3.02045 0.21052 1.97867  
 C -0.48609 -1.54209 2.92442  
 C 0.44854 -3.31259 0.45543  
 C -1.50425 -2.69783 -2.03772

C -3.56957 -0.44988 -1.11891  
 C -0.04502 0.28681 -2.31867  
 B 2.03782 0.15872 0.71424  
 P 3.80808 0.16535 -0.13490  
 C 4.19488 -1.27799 -1.22466  
 C 5.17535 0.28220 1.10405  
 C 0.78012 3.28703 -0.84107  
 C -2.09378 3.00432 -0.82298  
 H -0.54536 -3.19083 -2.26216  
 H -1.74381 -2.02429 -2.87601  
 H -2.28162 -3.48341 -2.01418  
 H -4.38836 -1.19037 -1.04949  
 H -3.32326 -0.33370 -2.18655  
 H -3.96609 0.50987 -0.75420  
 H -3.41272 1.09526 1.45177  
 H -2.50079 0.54760 2.88883  
 H -3.89678 -0.38108 2.30321  
 H -0.89699 -2.43495 3.43145  
 H -0.74324 -0.66467 3.53797  
 H 0.61140 -1.63870 2.92304  
 H 0.04082 -4.21276 0.95196  
 H 1.32092 -2.98278 1.04144  
 H 0.79394 -3.61555 -0.54489  
 H 2.05995 -0.83190 1.40889  
 H 4.04249 1.28890 -0.99099  
 H 0.61515 4.35176 -0.60965  
 H 0.77907 3.15126 -1.93245  
 H 1.75380 2.97444 -0.43561  
 H -2.08538 4.10056 -0.70770  
 H -2.99088 2.60000 -0.33015  
 H -2.13432 2.75010 -1.89305  
 H 0.34281 2.63793 2.17563  
 H -1.43808 2.48528 2.22418  
 H -0.69288 4.01956 1.66322  
 H -0.97775 0.63330 -2.79594  
 H 0.75095 1.01791 -2.53384  
 H 0.24560 -0.67704 -2.76779  
 H 1.36963 0.04381 -0.39048  
 H 1.98257 1.20749 1.31575  
 H 6.15482 0.31815 0.60398  
 H 5.03291 1.18926 1.71054  
 H 5.12780 -0.59696 1.76508  
 H 5.20690 -1.19158 -1.64796  
 H 4.12283 -2.20122 -0.62904  
 H 3.45639 -1.32010 -2.03964

TS(10-11'')<sub>Me</sub>

SCF Energy = -780.513033770  
 Enthalpy 0K = -780.036051  
 Enthalpy 298K = -780.002847  
 Free Energy 298K = -780.097254  
 SCF(DCM) = -780.563801379  
 SCF(BP86-D3) = -0.08932233  
 Lowest Frequencies = -905.8513  
 10.4611 cm-1  
 C -2.33019 -1.09196 -0.43854  
 C -2.19053 -0.60068 0.91770  
 C -1.06351 -1.27192 1.54495  
 C -0.50473 -2.18518 0.57088  
 C -1.27946 -2.06295 -0.64817  
 Rh -0.28413 -0.03571 -0.20662

P -0.54117 2.26691 -0.10582  
 C -0.67394 3.03145 1.58482  
 C -3.18948 0.26079 1.63807  
 C -0.67677 -1.19366 2.99427  
 C 0.56102 -3.20779 0.84807  
 C -1.09942 -2.89077 -1.88856  
 C -3.44405 -0.77816 -1.39944  
 C 0.48782 0.13542 -2.31925  
 B 1.73732 0.30446 0.76016  
 P 3.48813 0.14530 -0.13047  
 C 3.90513 -1.45495 -0.96762  
 C 4.85450 0.44516 1.08361  
 C 0.79445 3.29313 -0.90274  
 C -2.05863 2.92249 -0.97189  
 H -0.05559 -3.21799 -2.02060  
 H -1.40794 -2.34701 -2.79598  
 H -1.72071 -3.80331 -1.82943  
 H -4.24939 -1.53312 -1.33167  
 H -3.09422 -0.77193 -2.44520  
 H -3.89990 0.20289 -1.19355  
 H -3.67344 0.99170 0.97209  
 H -2.74013 0.80105 2.48537  
 H -3.99215 -0.37753 2.05204  
 H -1.15760 -2.00847 3.56688  
 H -0.98544 -0.24102 3.45174  
 H 0.41244 -1.29029 3.12620  
 H 0.12180 -4.09064 1.34865  
 H 1.34192 -2.80765 1.51422  
 H 1.04196 -3.56549 -0.07609  
 H 1.84582 -0.59268 1.57353  
 H 3.77130 1.11087 -1.15390  
 H 0.56211 4.36405 -0.78729  
 H 0.85837 3.05688 -1.97581  
 H 1.75980 3.07802 -0.42186  
 H -2.10033 4.02206 -0.90250  
 H -2.96589 2.50086 -0.51397  
 H -2.03066 2.62711 -2.03245  
 H 0.22061 2.77055 2.16922  
 H -1.56435 2.63863 2.09750  
 H -0.75968 4.12743 1.50381  
 H -0.44563 0.51443 -2.75893  
 H 1.29705 0.81651 -2.63311  
 H 0.69659 -0.87197 -2.70587  
 H 1.12006 0.11283 -0.99376  
 H 1.84905 1.41006 1.25938  
 H 5.83734 0.38919 0.59159  
 H 4.71850 1.43876 1.53607  
 H 4.79038 -0.31557 1.87696  
 H 4.94068 -1.44648 -1.33962  
 H 3.78248 -2.27181 -0.23977  
 H 3.21638 -1.62191 -1.80964

INT(10-11'')<sub>Me</sub>

SCF Energy = -780.528425879  
 Enthalpy 0K = -780.048829  
 Enthalpy 298K = -780.014381  
 Free Energy 298K = -780.111837  
 SCF(DCM) = -780.587899821  
 SCF(BP86-D3) = -0.08911780  
 Lowest Frequencies = 19.8174  
 30.7325 cm-1

C -2.01524 -1.54844 -0.60943  
 C -2.31143 -0.79712 0.54929  
 C -1.19690 -0.98430 1.51613  
 C -0.29492 -1.99404 0.96270  
 C -0.73882 -2.25202 -0.37076  
 Rh -0.24956 -0.01468 -0.14627  
 P -0.64936 2.27179 -0.10113  
 C -0.81607 3.09129 1.55959  
 C -3.58328 -0.05882 0.85054  
 C -1.21750 -0.54623 2.95137  
 C 0.77314 -2.72617 1.72110  
 C -0.13617 -3.23402 -1.33411  
 C -2.85702 -1.69966 -1.84458  
 C 0.54639 0.17860 -2.83726  
 B 1.61494 0.58198 0.86950  
 P 3.27281 0.20473 -0.10271  
 C 3.64472 -1.52311 -0.66844  
 C 4.78924 0.72908 0.83290  
 C 0.57160 3.36745 -0.98779  
 C -2.23426 2.78338 -0.95130  
 H 0.92603 -3.42764 -1.11927  
 H -0.22657 -2.89700 -2.37967  
 H -0.66657 -4.20248 -1.26544  
 H -3.41063 -2.65702 -1.82846  
 H -2.24567 -1.70139 -2.76276  
 H -3.59992 -0.89193 -1.93572  
 H -4.12238 0.23209 -0.06442  
 H -3.40953 0.84464 1.45687  
 H -4.26054 -0.70793 1.43695  
 H -1.71002 -1.31631 3.57553  
 H -1.77696 0.39218 3.08769  
 H -0.19819 -0.39792 3.33874  
 H 0.31604 -3.52413 2.33566  
 H 1.32566 -2.05725 2.39857  
 H 1.49735 -3.20991 1.04720  
 H 1.74221 -0.05978 1.89815  
 H 3.40601 0.94483 -1.32457  
 H 0.24397 4.41753 -0.91991  
 H 0.62111 3.07775 -2.04858  
 H 1.56603 3.26339 -0.53207  
 H -2.36327 3.87697 -0.89393  
 H -3.09619 2.29441 -0.47509  
 H -2.19807 2.48172 -2.01001  
 H 0.10318 2.92660 2.14020  
 H -1.66721 2.65240 2.10199  
 H -0.99116 4.17232 1.43446  
 H -0.52930 0.37755 -2.91947  
 H 1.11588 0.99844 -3.29822  
 H 0.78994 -0.77770 -3.32158  
 H 0.91052 0.10148 -1.76573  
 H 1.79124 1.77120 1.09418  
 H 5.69928 0.57965 0.23187  
 H 4.69035 1.79073 1.10417  
 H 4.85273 0.13470 1.75764  
 H 4.60667 -1.56230 -1.20152  
 H 3.68979 -2.18090 0.21310  
 H 2.84101 -1.87115 -1.33437

TS (10-11'')<sub>2Me</sub>  
 SCF Energy = -780.528286083  
 Enthalpy 0K = -780.049123

Enthalpy 298K = -780.015234  
 Free Energy 298K = -780.110929  
 SCF(DCM) = -780.577784361  
 SCF(BP86-D3) = -0.08816918  
 Lowest Frequencies = -59.4659  
 25.9429 cm<sup>-1</sup>  
 C 2.37538 -0.71461 -0.46572  
 C 1.32287 -0.96784 -1.48857  
 C 0.43633 -2.01097 -0.96876  
 C 0.81316 -2.21918 0.39220  
 C 2.04490 -1.45596 0.68746  
 Rh 0.24058 -0.00813 0.08002  
 P 0.52184 2.29512 0.07658  
 C -0.81269 3.30205 0.90161  
 C 1.39458 -0.53749 -2.92336  
 C -0.55560 -2.80130 -1.77036  
 C 0.19900 -3.20085 1.34747  
 C 2.81781 -1.54643 1.97230  
 C 3.62720 0.07633 -0.71084  
 B -1.60913 0.46888 -0.98328  
 P -3.23153 0.09835 0.04483  
 C -4.78145 0.55144 -0.87434  
 C -3.54157 -1.62202 0.66471  
 C 2.03096 2.88580 1.00754  
 C 0.72861 3.13294 -1.57035  
 C -0.68463 0.19657 3.05981  
 H -0.81864 -3.49223 1.04625  
 H 0.16207 -2.80662 2.37618  
 H 0.80951 -4.12290 1.38196  
 H 3.41258 -2.47839 2.00866  
 H 2.15396 -1.55596 2.85259  
 H 3.51818 -0.70472 2.08754  
 H 4.10595 0.39473 0.22813  
 H 3.44622 0.96882 -1.33150  
 H 4.36063 -0.54557 -1.25787  
 H 1.97660 -1.27413 -3.51040  
 H 1.89358 0.43766 -3.03457  
 H 0.39130 -0.46532 -3.36963  
 H -0.03534 -3.60675 -2.32151  
 H -1.07860 -2.17334 -2.50754  
 H -1.31319 -3.27946 -1.13007  
 H -1.73288 -0.25567 -1.95605  
 H -3.35834 0.87375 1.24445  
 H -0.54847 4.37153 0.87002  
 H -0.91029 2.98753 1.95203  
 H -1.76791 3.14522 0.38145  
 H 2.09010 3.98649 0.98325  
 H 2.94114 2.46787 0.55349  
 H 1.97225 2.55105 2.05489  
 H -0.15132 2.92530 -2.19601  
 H 1.62630 2.73839 -2.07081  
 H 0.84361 4.22057 -1.43318  
 H 0.28639 0.66211 3.27269  
 H -1.50335 0.87606 3.33567  
 H -0.77670 -0.74971 3.61274  
 H -0.77217 -0.04428 1.96691  
 H -1.81839 1.63393 -1.29138  
 H -5.67485 0.39402 -0.25074  
 H -4.71884 1.60675 -1.17903  
 H -4.84522 -0.07183 -1.77988  
 H -4.49873 -1.67845 1.20481

H -3.56929 -2.30515 -0.19833  
H -2.72231 -1.92278 1.33418

11''<sub>Me</sub>

SCF Energy = -740.009640582  
Enthalpy 0K = -739.576267  
Enthalpy 298K = -739.545153  
Free Energy 298K = -739.635859  
SCF(DCM) = -740.061246888  
SCF(BP86-D3) = -0.07397428  
Lowest Frequencies = 23.0288  
33.0444 cm<sup>-1</sup>

C -1.14448 -2.07790 -0.24482  
C -1.92963 -1.16696 -1.12122  
C -2.59388 -0.20287 -0.32188  
C -2.09976 -0.38773 1.04199  
C -1.30965 -1.64200 1.09743  
Rh -0.24392 -0.03746 0.00589  
P 0.26257 2.24689 -0.10836  
C 1.45564 3.01212 1.09776  
C -2.04343 -1.33559 -2.60570  
C -3.62867 0.79138 -0.76822  
C -2.55608 0.36847 2.25105  
C -0.89180 -2.34247 2.35455  
C -0.44634 -3.32229 -0.70988  
B 1.61451 -0.47996 1.00904  
P 3.21581 -0.38957 -0.10220  
C 4.76101 -0.73420 0.86988  
C 3.30178 -1.54154 -1.55261  
C 0.96533 2.75938 -1.76462  
C -1.19343 3.40270 0.04033  
H -1.06114 -1.53434 -3.06662  
H -2.48277 -0.45108 -3.09121  
H -2.68760 -2.20329 -2.84362  
H -4.63483 0.33297 -0.74527  
H -3.45611 1.14070 -1.79921  
H -3.66490 1.67290 -0.10992  
H -2.84445 1.40248 2.00677  
H -1.77578 0.39278 3.02724  
H -3.44530 -0.12609 2.68838  
H -1.74744 -2.91253 2.76306  
H -0.55990 -1.63279 3.12805  
H -0.06947 -3.04949 2.17344  
H -1.16038 -4.16444 -0.78011  
H 0.35202 -3.61828 -0.01201  
H -0.00054 -3.19163 -1.70925  
H 1.88265 0.27467 1.92945  
H 1.64840 -1.65711 1.33698  
H 3.52570 0.87696 -0.70484  
H 1.12931 3.84949 -1.78675  
H 0.26021 2.48110 -2.56293  
H 1.92325 2.24923 -1.94714  
H -0.86197 4.44847 -0.06907  
H -1.66645 3.27935 1.02692  
H -1.93053 3.17247 -0.74301  
H 2.43627 2.52133 1.02015  
H 1.07908 2.85943 2.12069  
H 1.56322 4.09051 0.89789  
H 4.28038 -1.47918 -2.05212  
H 3.14286 -2.56804 -1.18680  
H 2.50423 -1.29327 -2.26916

H 5.65438 -0.67949 0.22887  
H 4.83912 -0.00088 1.68638  
H 4.67717 -1.74042 1.30889

TS(11''-11)<sub>Me</sub>

SCF Energy = -740.006403439  
Enthalpy 0K = -739.573990  
Enthalpy 298K = -739.543347  
Free Energy 298K = -739.632858  
SCF(DCM) = -740.056807168  
SCF(BP86-D3) = -0.07343151  
Lowest Frequencies = -133.4316  
13.8407 cm<sup>-1</sup>

C -1.82471 -1.59697 -0.85935  
C -2.57400 -0.31459 -0.85330  
C -2.57347 0.17453 0.46624  
C -1.76263 -0.75811 1.29136  
C -1.43636 -1.92697 0.47733  
Rh -0.32220 -0.08745 -0.15909  
P 0.50708 2.08433 0.00911  
C 1.18492 2.59397 1.66919  
C -3.25560 0.26987 -2.05573  
C -3.32647 1.35042 1.01443  
C -1.60189 -0.66136 2.77785  
C -0.88399 -3.23574 0.95877  
C -1.65018 -2.45535 -2.07485  
B 1.51897 -1.11770 0.15226  
P 3.39805 -0.55393 0.07078  
C 4.49680 -1.74129 0.97733  
C 4.13288 -0.43710 -1.62892  
C 1.85497 2.62758 -1.16704  
C -0.75291 3.42325 -0.31629  
H -2.61620 0.21627 -2.95250  
H -3.53423 1.32307 -1.89816  
H -4.18285 -0.28690 -2.28802  
H -4.25634 1.00366 1.50323  
H -3.61791 2.06245 0.22724  
H -2.75138 1.89350 1.78244  
H -1.54124 0.38479 3.11729  
H -0.70100 -1.19162 3.12123  
H -2.47582 -1.11973 3.28075  
H -1.70430 -3.96355 1.09658  
H -0.36430 -3.12708 1.92218  
H -0.16630 -3.66621 0.24242  
H -2.60261 -2.96435 -2.31696  
H -0.88273 -3.22846 -1.92292  
H -1.37224 -1.85599 -2.95785  
H 1.49099 -1.77462 1.17661  
H 1.44584 -1.81197 -0.86694  
H 3.78796 0.69646 0.66562  
H 2.02444 3.71251 -1.06783  
H 1.55410 2.40272 -2.20222  
H 2.79436 2.10206 -0.94520  
H -0.28710 4.41720 -0.21275  
H -1.58602 3.34169 0.39576  
H -1.14715 3.31284 -1.33831  
H 2.03240 1.94611 1.93790  
H 0.39976 2.46749 2.43056  
H 1.51145 3.64684 1.65264  
H 5.19471 -0.15164 -1.58640  
H 4.03658 -1.42597 -2.10421

H 3.57592 0.29364 -2.23390  
H 5.55462 -1.44846 0.89635  
H 4.19542 -1.76723 2.03538  
H 4.35377 -2.74478 0.54716

11<sub>Me</sub>

SCF Energy = -740.023642917  
Enthalpy 0K = -739.590560  
Enthalpy 298K = -739.559742  
Free Energy 298K = -739.649451  
SCF(DCM) = -740.074150640  
SCF(BP86-D3) = -0.07322582  
Lowest Frequencies = 22.2070  
33.2834 cm<sup>-1</sup>

C -2.06674 -0.09105 1.13328  
C -1.48043 -1.43303 1.16060  
C -1.56563 -1.95730 -0.17202  
C -2.29622 -0.98206 -1.00289  
C -2.65427 0.12855 -0.19165  
Rh -0.30093 -0.09842 -0.18640  
P 0.49595 2.08099 -0.10289  
C 1.55539 2.60385 -1.55070  
C -0.99608 -2.15396 2.38684  
C -1.16373 -3.33411 -0.61896  
C -2.68665 -1.20473 -2.43558  
C -3.56397 1.25873 -0.58469  
C -2.32706 0.74842 2.35269  
B 1.50611 -1.00951 -0.21508  
P 3.39995 -0.53219 -0.10049  
C 4.08685 -1.10536 1.51887  
C 4.46526 -1.29913 -1.41148  
C -0.77724 3.44358 -0.12668  
C 1.51026 2.59982 1.37831  
H -1.89992 -1.73198 -2.99779  
H -2.90305 -0.25791 -2.95396  
H -3.59935 -1.82788 -2.48987  
H -4.61991 0.96253 -0.44023  
H -3.44761 1.53587 -1.64481  
H -3.39829 2.15918 0.02518  
H -2.43204 1.81708 2.10840  
H -1.52558 0.64129 3.09993  
H -3.27221 0.43284 2.83389  
H -1.84163 -2.66467 2.88521  
H -0.54978 -1.46202 3.11792  
H -0.24485 -2.91877 2.13938  
H -2.01761 -4.03087 -0.53119  
H -0.34214 -3.73723 -0.00703  
H -0.83756 -3.34346 -1.67131  
H 1.57133 -2.21638 -0.06410  
H 3.77569 0.84867 -0.15223  
H 1.91033 3.64002 -1.42395  
H 0.95115 2.53425 -2.46879  
H 2.42176 1.93535 -1.66217  
H -0.27599 4.42504 -0.15846  
H -1.39950 3.39408 0.77958  
H -1.42134 3.33538 -1.01176  
H 2.38938 1.94665 1.48053  
H 0.89386 2.48511 2.28381  
H 1.83857 3.64909 1.29206  
H 0.97171 -0.58728 -1.36970  
H 5.52731 -1.07270 -1.23026

H 4.30847 -2.38870 -1.39601  
H 4.16549 -0.91089 -2.39673  
H 5.16907 -0.91420 1.57153  
H 3.57341 -0.58083 2.33861  
H 3.89500 -2.18540 1.61290

TS(11-11')<sub>Me</sub>

SCF Energy = -740.016305361  
Enthalpy 0K = -739.585090  
Enthalpy 298K = -739.554432  
Free Energy 298K = -739.643879  
SCF(DCM) = -740.067693598  
SCF(BP86-D3) = -0.07342819  
Lowest Frequencies = -351.3024  
24.6601 cm<sup>-1</sup>

C -2.20212 -0.12158 1.08044  
C -1.56750 -1.42128 1.17720  
C -1.48865 -1.96717 -0.15706  
C -2.14953 -1.02775 -1.07106  
C -2.61424 0.08336 -0.30828  
Rh -0.24410 -0.08855 -0.12221  
P 0.47648 2.11066 -0.11012  
C 1.40030 2.66789 -1.63284  
C -1.17746 -2.12391 2.44831  
C -1.03668 -3.35471 -0.52038  
C -2.41887 -1.28148 -2.52852  
C -3.50822 1.18275 -0.81257  
C -2.61979 0.72523 2.25204  
B 1.47858 -0.94317 0.24228  
P 3.38153 -0.54124 -0.10491  
C 4.40064 -0.79877 1.41854  
C 4.11783 -1.61909 -1.42116  
C -0.84383 3.42324 -0.01388  
C 1.59846 2.66105 1.27976  
H -1.60867 -1.85710 -3.00178  
H -2.54114 -0.34297 -3.09116  
H -3.35145 -1.86404 -2.64961  
H -4.56222 0.84733 -0.80333  
H -3.27013 1.46993 -1.84962  
H -3.45575 2.08405 -0.18373  
H -2.75136 1.78234 1.97264  
H -1.88887 0.67698 3.07443  
H -3.59020 0.37558 2.65196  
H -2.02703 -2.71835 2.83318  
H -0.88704 -1.41206 3.23665  
H -0.33646 -2.81682 2.28979  
H -1.88380 -4.06219 -0.45415  
H -0.25030 -3.71949 0.15870  
H -0.64698 -3.40127 -1.54951  
H 1.55375 -2.08965 0.65307  
H 3.72502 0.78158 -0.52911  
H 1.71928 3.71938 -1.54331  
H 0.73518 2.55694 -2.50319  
H 2.28288 2.03135 -1.79692  
H -0.38100 4.42249 -0.06617  
H -1.39335 3.33331 0.93529  
H -1.54817 3.30582 -0.85039  
H 2.54773 2.10501 1.24135  
H 1.10750 2.43967 2.23991  
H 1.81173 3.74100 1.21339  
H 0.72123 -0.31463 -1.39221

H 5.19292 -1.40988 -1.53194  
H 3.97060 -2.67178 -1.13458  
H 3.60086 -1.43082 -2.37420  
H 5.46630 -0.63054 1.20187  
H 4.06810 -0.10615 2.20636  
H 4.25052 -1.83234 1.76681

11'<sub>Me</sub>

SCF Energy = -740.017537343  
Enthalpy 0K = -739.584878  
Enthalpy 298K = -739.553982  
Free Energy 298K = -739.644160  
SCF(DCM) = -740.068765650  
SCF(BP86-D3) = -0.07363429  
Lowest Frequencies = 13.7699

34.0692 cm<sup>-1</sup>

C -2.22218 -0.14539 1.06758  
C -1.54100 -1.40980 1.20591  
C -1.40578 -1.98391 -0.11808  
C -2.07398 -1.08893 -1.06559  
C -2.58929 0.02573 -0.33722  
Rh -0.20776 -0.07423 -0.11904  
P 0.44267 2.14738 -0.13045  
C 1.25839 2.74275 -1.69754  
C -1.16849 -2.07976 2.49860  
C -0.92170 -3.37422 -0.43097  
C -2.30572 -1.38259 -2.52264  
C -3.49851 1.08953 -0.89088  
C -2.69492 0.71381 2.20889  
B 1.46899 -0.83028 0.53654  
P 3.32344 -0.56275 -0.10923  
C 4.63547 -0.58186 1.19878  
C 3.77840 -1.87672 -1.33449  
C -0.91344 3.41207 0.06234  
C 1.62769 2.71901 1.19480  
H -1.47343 -1.95252 -2.96332  
H -2.43309 -0.46031 -3.11045  
H -3.22405 -1.98585 -2.64984  
H -4.54067 0.72065 -0.92444  
H -3.22436 1.37580 -1.91932  
H -3.50299 1.99804 -0.26951  
H -2.87157 1.75491 1.89664  
H -1.97429 0.72356 3.04182  
H -3.65354 0.33135 2.60675  
H -1.98828 -2.73914 2.83880  
H -0.97673 -1.34734 3.29823  
H -0.26823 -2.70606 2.39206  
H -1.75937 -4.09353 -0.36662  
H -0.14785 -3.70668 0.27835  
H -0.50632 -3.44320 -1.44851  
H 1.55099 -1.77240 1.30326  
H 3.56270 0.65190 -0.82563  
H 1.52795 3.80899 -1.62260  
H 0.55877 2.59561 -2.53483  
H 2.16268 2.14935 -1.90117  
H -0.48560 4.42701 0.01211  
H -1.41261 3.28051 1.03422  
H -1.65346 3.29148 -0.74227  
H 2.58134 2.17611 1.10579  
H 1.19208 2.49605 2.18078  
H 1.82127 3.80142 1.11117

H 0.61395 -0.14125 -1.46956  
H 4.80542 -1.72146 -1.69852  
H 3.70247 -2.85903 -0.84339  
H 3.07111 -1.83772 -2.17632  
H 5.63417 -0.47894 0.74780  
H 4.46369 0.24289 1.90698  
H 4.57097 -1.53615 1.74418

TS(11''-9')<sub>1Me</sub>

SCF Energy = -740.009205595  
Enthalpy 0K = -739.575031  
Enthalpy 298K = -739.545240  
Free Energy 298K = -739.631309  
SCF(DCM) = -740.061886685  
SCF(BP86-D3) = -0.07715848  
Lowest Frequencies = -52.0055

24.1907 cm<sup>-1</sup>

C 0.88717 -2.10981 -0.51443  
C 0.92593 -1.89486 0.90035  
C 1.76699 -0.71950 1.11156  
C 2.38596 -0.35631 -0.19521  
C 1.82313 -1.18613 -1.18564  
Rh 0.09591 -0.01089 -0.01199  
P 0.00941 2.31746 -0.07041  
C -1.61068 3.12019 -0.53090  
C 0.33685 -2.75993 1.97648  
C 2.22290 -0.21678 2.44812  
C 3.52022 0.61317 -0.35293  
C 2.15155 -1.22193 -2.65113  
C 0.17278 -3.21784 -1.23188  
B -1.60777 0.13473 1.30694  
P -2.81512 -0.44389 -0.14405  
C -3.39880 -2.20002 -0.03328  
C -4.36410 0.54145 -0.46420  
C 0.44395 3.19398 1.51217  
C 1.14176 3.12459 -1.31682  
H 3.43065 1.47630 0.32613  
H 3.61084 0.98550 -1.38502  
H 4.47351 0.11150 -0.10064  
H 2.82529 -2.06859 -2.88158  
H 2.65774 -0.30094 -2.97855  
H 1.24981 -1.35038 -3.27230  
H -0.32801 -2.86592 -2.14943  
H -0.56933 -3.71749 -0.59210  
H 0.90299 -3.98736 -1.54582  
H 1.08004 -3.50466 2.31648  
H -0.54757 -3.31403 1.62488  
H 0.02617 -2.16698 2.84983  
H 3.10671 -0.79389 2.78367  
H 1.43854 -0.33061 3.21124  
H 2.52065 0.84246 2.41328  
H -1.65529 -0.73991 2.14826  
H -2.20469 -0.41209 -1.45568  
H -1.47925 4.21324 -0.57913  
H -2.36797 2.87993 0.22854  
H -1.93717 2.75794 -1.51881  
H 0.35283 4.28519 1.38526  
H 1.47870 2.95101 1.79845  
H -0.23581 2.85004 2.30594  
H 0.88221 2.76977 -2.32636  
H 2.18907 2.86479 -1.10945

H 1.03001 4.22072 -1.27720  
H -2.00266 1.21883 1.68936  
H -3.94651 -2.49442 -0.94109  
H -2.53832 -2.86616 0.11753  
H -4.06093 -2.27772 0.84312  
H -4.97295 0.51997 0.45312  
H -4.10171 1.58421 -0.69112  
H -4.93281 0.11088 -1.30277

INT(11'-9')<sub>Me</sub>

SCF Energy = -740.043358204  
Enthalpy 0K = -739.608642  
Enthalpy 298K = -739.578506  
Free Energy 298K = -739.663882  
SCF(DCM) = -740.093962560  
SCF(BP86-D3) = -0.08391334  
Lowest Frequencies = 39.5891  
61.4573 cm<sup>-1</sup>

C -2.01915 -0.80442 -0.72273  
C -1.98360 -0.75813 0.73447  
C -0.89870 -1.58946 1.18967  
C -0.29502 -2.20300 0.01859  
C -0.97720 -1.71519 -1.15923  
Rh -0.02418 0.10378 -0.15527  
P 2.31596 0.06412 -0.00771  
C 3.29900 1.62469 -0.24470  
C -3.01182 -0.14100 1.63971  
C -0.61090 -1.93986 2.62237  
C 0.67327 -3.35100 0.05136  
C -0.78113 -2.20911 -2.56677  
C -3.09485 -0.23736 -1.60781  
B 0.27510 1.66923 1.71249  
P -0.45452 2.40244 0.15468  
C -2.21964 2.96122 0.06643  
C 0.43065 3.63513 -0.90792  
C 3.03977 -0.63614 1.55670  
C 3.07969 -0.99779 -1.33554  
H 1.43152 -3.25169 0.84371  
H 1.18441 -3.49698 -0.91212  
H 0.11630 -4.28316 0.26253  
H -1.42764 -3.08677 -2.75259  
H 0.25754 -2.51949 -2.75730  
H -1.04504 -1.44085 -3.30914  
H -2.69929 0.05817 -2.59181  
H -3.58108 0.64128 -1.15875  
H -3.88193 -0.99464 -1.78084  
H -3.55038 -0.94142 2.17902  
H -3.76480 0.43276 1.07976  
H -2.55981 0.51344 2.40409  
H -1.26454 -2.76887 2.95359  
H -0.79048 -1.08558 3.29263  
H 0.42984 -2.26847 2.76552  
H -0.48932 1.29228 2.55978  
H 0.35815 0.68921 -1.56807  
H 4.36894 1.38413 -0.13460  
H 3.02314 2.38045 0.50360  
H 3.12688 2.01429 -1.25964  
H 4.13702 -0.69591 1.46855  
H 2.63844 -1.64481 1.73282  
H 2.76855 0.00938 2.40457  
H 2.76294 -0.62295 -2.32079

H 2.75402 -2.04177 -1.22822  
H 4.17913 -0.95794 -1.26368  
H 1.42121 1.90746 1.98128  
H -2.60670 2.86680 -0.95991  
H -2.83799 2.37718 0.75922  
H -2.25442 4.02096 0.36839  
H 0.21320 4.64576 -0.52576  
H 1.51331 3.46717 -0.87549  
H 0.07751 3.55432 -1.94792

TS(11''-6)<sub>2Me</sub>

SCF Energy = -740.024508379  
Enthalpy 0K = -739.590706  
Enthalpy 298K = -739.560870  
Free Energy 298K = -739.646322  
SCF(DCM) = -740.074488893  
SCF(BP86-D3) = -0.08181577  
Lowest Frequencies = -55.1734  
27.9411 cm<sup>-1</sup>

C 2.12047 0.11634 -1.08425  
C 2.23257 -0.88636 -0.05841  
C 1.92418 -0.25662 1.23366  
C 1.61725 1.11781 0.98499  
C 1.73809 1.36348 -0.45634  
Rh 0.02293 -0.07716 -0.22256  
P -1.78872 1.36634 -0.03892  
C -3.20191 1.01990 -1.20300  
C 2.91824 -2.21039 -0.26719  
C 2.16409 -0.85278 2.59505  
C 1.41950 2.16741 2.04392  
C 1.82885 2.70656 -1.12684  
C 2.52943 -0.05531 -2.52243  
B -0.08136 -2.87683 1.06258  
P -1.35878 -1.98087 0.01000  
C -1.77054 -2.84034 -1.58797  
C -2.96377 -1.96790 0.96708  
C -2.59663 1.55277 1.63155  
C -1.46591 3.14909 -0.46815  
H 0.97422 1.74379 2.95761  
H 0.77971 2.99621 1.70184  
H 2.39257 2.60987 2.32838  
H 2.89273 2.99018 -1.23312  
H 1.34097 3.50282 -0.54765  
H 1.39457 2.69425 -2.13889  
H 1.99526 0.64042 -3.18689  
H 2.34298 -1.07907 -2.88062  
H 3.61200 0.14328 -2.63286  
H 3.98624 -2.02741 -0.49012  
H 2.50168 -2.77200 -1.11811  
H 2.86958 -2.85391 0.62177  
H 3.14366 -0.51408 2.98198  
H 2.17725 -1.95158 2.57332  
H 1.39887 -0.54156 3.32335  
H 0.75701 -3.55070 0.54198  
H -0.51398 -0.18860 -1.69221  
H -4.03139 1.72059 -1.01429  
H -3.56920 -0.01030 -1.09728  
H -2.83756 1.15390 -2.23347  
H -3.40864 2.29707 1.58102  
H -1.84002 1.89166 2.35615  
H -3.00454 0.59230 1.97456

H -1.04449 3.22252 -1.48125  
H -0.76142 3.59267 0.24983  
H -2.41456 3.70929 -0.42643  
H -0.13686 -2.70784 2.24875  
H -2.41610 -2.19561 -2.20446  
H -0.83498 -3.02853 -2.13464  
H -2.28336 -3.79522 -1.39117  
H -3.37567 -2.98972 0.96867  
H -2.74851 -1.67270 2.00476  
H -3.71357 -1.28937 0.53581

INT(11''-6)<sub>2Me</sub>

SCF Energy = -740.028795941  
Enthalpy 0K = -739.594380  
Enthalpy 298K = -739.564068  
Free Energy 298K = -739.650403  
SCF(DCM) = -740.079538564  
SCF(BP86-D3) = -0.08259835  
Lowest Frequencies = 27.6996  
50.2112 cm<sup>-1</sup>

C 2.17554 0.05081 -1.00354  
C 2.24158 -0.90750 0.08270  
C 1.79927 -0.22684 1.30788  
C 1.54748 1.13891 0.98246  
C 1.76629 1.32103 -0.46074  
Rh 0.02242 -0.10600 -0.28389  
P -1.76404 1.36184 -0.05020  
C -3.36912 0.93495 -0.88926  
C 3.12369 -2.13056 0.04474  
C 1.83673 -0.82826 2.68437  
C 1.31355 2.24790 1.96950  
C 1.89491 2.63252 -1.18820  
C 2.67466 -0.19235 -2.40130  
B 0.24563 -2.78752 -0.13423  
P -1.42468 -1.95414 -0.04799  
C -2.53093 -2.41676 -1.46779  
C -2.41152 -2.24515 1.50246  
C -2.31525 1.69320 1.69827  
C -1.48873 3.07705 -0.71810  
H 0.83510 1.88511 2.89239  
H 0.69934 3.06253 1.55406  
H 2.28175 2.69631 2.26042  
H 2.96504 2.88573 -1.30430  
H 1.42738 3.46476 -0.64297  
H 1.45794 2.59208 -2.19804  
H 2.21502 0.49899 -3.12345  
H 2.46588 -1.22076 -2.73345  
H 3.76990 -0.04341 -2.44463  
H 4.17463 -1.78552 0.10322  
H 3.01696 -2.70244 -0.88804  
H 2.94620 -2.80967 0.88924  
H 2.86287 -0.79070 3.09571  
H 1.52905 -1.88598 2.67255  
H 1.18135 -0.28886 3.38584  
H 0.64477 -3.14150 -1.20728  
H -0.49410 -0.21324 -1.76341  
H -4.05476 1.79446 -0.81578  
H -3.84137 0.06917 -0.40228  
H -3.18536 0.70344 -1.94907  
H -3.15462 2.40803 1.70556  
H -1.47924 2.11061 2.27787

H -2.63187 0.75053 2.16878  
H -1.22722 3.02024 -1.78550  
H -0.67201 3.57303 -0.17589  
H -2.40918 3.67161 -0.59761  
H 0.75259 -3.09568 0.90539  
H -3.41822 -1.77315 -1.54289  
H -1.94379 -2.33981 -2.39473  
H -2.85561 -3.46034 -1.32892  
H -2.79117 -3.27979 1.50158  
H -1.75573 -2.10321 2.37430  
H -3.26646 -1.55414 1.56995

TS(11''-6)<sub>2Me</sub>

SCF Energy = -740.028500109  
Enthalpy 0K = -739.594319  
Enthalpy 298K = -739.564734  
Free Energy 298K = -739.649046  
SCF(DCM) = -740.079634536  
SCF(BP86-D3) = -0.08245235  
Lowest Frequencies = -33.4525  
35.3394 cm<sup>-1</sup>

C 2.16988 0.23371 -0.99082  
C 2.24833 -0.87769 -0.06474  
C 1.79847 -0.39239 1.25056  
C 1.51629 0.99960 1.13633  
C 1.74090 1.39894 -0.26257  
Rh 0.02587 -0.08550 -0.30476  
P -1.77353 1.37188 -0.05099  
C -3.28304 1.07379 -1.09607  
C 3.14859 -2.06594 -0.29311  
C 1.83829 -1.20011 2.51695  
C 1.23396 1.94092 2.27464  
C 1.87191 2.80671 -0.77667  
C 2.67671 0.21340 -2.40648  
B 0.25031 -2.72417 -0.54955  
P -1.39678 -1.96561 -0.09651  
C -2.72783 -2.31684 -1.34734  
C -2.10185 -2.46258 1.55129  
C -2.49071 1.48086 1.66517  
C -1.45064 3.16131 -0.44871  
H 0.75654 1.42668 3.12319  
H 0.59033 2.78410 1.97634  
H 2.17943 2.37742 2.64676  
H 2.94339 3.07732 -0.82148  
H 1.38384 3.54355 -0.12357  
H 1.46738 2.92001 -1.79460  
H 2.21954 1.00778 -3.01526  
H 2.47366 -0.75129 -2.89572  
H 3.77167 0.37063 -2.41912  
H 4.19555 -1.70653 -0.25620  
H 2.99571 -2.53385 -1.27657  
H 3.03197 -2.83936 0.47784  
H 2.86701 -1.22951 2.92229  
H 1.52904 -2.24347 2.34318  
H 1.19079 -0.77263 3.29835  
H 0.50285 -2.91803 -1.70505  
H -0.48401 -0.11639 -1.79017  
H -3.96998 1.92894 -0.99218  
H -3.80226 0.16303 -0.76934  
H -2.99025 0.96321 -2.15078  
H -3.32625 2.19995 1.68487



H -1.71506 1.80649 2.37452  
H -2.85301 0.48915 1.97316  
H -1.06787 3.25326 -1.47584  
H -0.71436 3.58369 0.24856  
H -2.39222 3.72705 -0.35726  
H 0.88540 -3.17907 0.35629  
H -3.68592 -1.84740 -1.08221  
H -2.39638 -1.95687 -2.33203  
H -2.87181 -3.40801 -1.39025  
H -2.42861 -3.51413 1.50587  
H -1.31925 -2.36054 2.31724  
H -2.96356 -1.83315 1.82312

<sup>6</sup>Me

SCF Energy = -740.053796342  
Enthalpy 0K = -739.619076  
Enthalpy 298K = -739.588958  
Free Energy 298K = -739.674818  
SCF(DCM) = -740.106033752  
SCF(BP86-D3) = -0.08260266  
Lowest Frequencies = 29.4163  
45.1276 cm<sup>-1</sup>

C -1.23175 -1.16231 1.25410  
C -1.48587 -1.76623 -0.05969  
C -2.10962 -0.77007 -0.88252  
C -2.28515 0.44011 -0.09156  
C -1.76944 0.18044 1.24143  
Rh -0.06301 0.02951 -0.24992  
P 2.02870 -1.03127 -0.07405  
C 3.28990 -0.60408 -1.37418  
C -1.36272 -3.22271 -0.40863  
C -2.61276 -0.95867 -2.28452  
C -3.09374 1.62514 -0.54012  
C -1.91566 1.07030 2.44290  
C -0.76190 -1.89922 2.47730  
B 0.60342 1.66157 -2.01143  
P 0.84798 2.20110 -0.18605  
C 2.53738 2.65983 0.44554  
C -0.19225 3.60594 0.43534  
C 2.93496 -0.81421 1.53971  
C 2.02189 -2.88620 -0.23300  
H -2.74614 2.02051 -1.50872  
H -3.07639 2.44075 0.19790  
H -4.15104 1.32902 -0.66865  
H -2.83081 0.79616 3.00020  
H -2.00926 2.13008 2.16428  
H -1.06583 0.97078 3.13561  
H -0.31167 -1.22049 3.21813  
H -0.02629 -2.68240 2.23474  
H -1.61705 -2.40062 2.96786  
H -2.34929 -3.71006 -0.29642  
H -0.66540 -3.75620 0.25226  
H -1.04191 -3.37826 -1.45060  
H -3.68762 -1.21864 -2.26407  
H -2.08458 -1.77139 -2.80567  
H -2.50584 -0.03952 -2.88086  
H 1.62099 1.54360 -2.65007  
H 0.34376 0.30593 -1.90599  
H 4.23608 -1.12485 -1.15483  
H 3.46932 0.47795 -1.42964  
H 2.90753 -0.93205 -2.35319

H 3.87824 -1.38493 1.53276  
H 2.29595 -1.18090 2.35776  
H 3.15285 0.24804 1.71740  
H 1.53484 -3.17933 -1.17436  
H 1.48460 -3.34298 0.61068  
H 3.06111 -3.25387 -0.23132  
H -0.38008 2.13906 -2.52389  
H -0.23350 3.61598 1.53568  
H 0.26096 4.54898 0.08722  
H -1.20537 3.53018 0.01995  
H 2.54449 2.68767 1.54680  
H 3.30190 1.95634 0.09009  
H 2.78374 3.66384 0.06165

TS(11''-6)<sup>3</sup>Me

SCF Energy = -739.979801160  
Enthalpy 0K = -739.550677  
Enthalpy 298K = -739.520095  
Free Energy 298K = -739.609171  
SCF(DCM) = -740.029021633  
SCF(BP86-D3) = -0.07521582  
Lowest Frequencies = -776.1673  
11.9898 cm<sup>-1</sup>

C -2.47378 0.19277 0.35831  
C -1.62021 -0.47974 1.34635  
C -1.17928 -1.74326 0.77243  
C -1.60415 -1.74757 -0.61026  
C -2.43879 -0.56159 -0.84227  
Rh -0.14436 -0.06933 -0.26529  
P 0.52343 2.19743 -0.02693  
C 2.07685 2.67906 -0.92909  
C -1.52641 -0.11184 2.80149  
C -0.59616 -2.89969 1.53477  
C -1.46217 -2.88910 -1.57547  
C -3.17795 -0.27169 -2.11668  
C -3.32862 1.39520 0.63931  
B 1.42372 -1.11312 -1.18212  
P 2.93413 -0.66399 -0.03399  
C 3.09484 -2.09697 1.14801  
C 4.68180 -0.56665 -0.76408  
C -0.69390 3.40810 -0.75157  
C 0.81394 2.85919 1.68802  
H -0.59252 -3.52054 -1.33913  
H -1.35297 -2.53752 -2.61356  
H -2.36272 -3.52963 -1.53536  
H -4.11909 -0.85131 -2.15843  
H -2.58718 -0.55131 -3.00345  
H -3.44399 0.79297 -2.20562  
H -3.58215 1.95109 -0.27678  
H -2.85633 2.08955 1.35305  
H -4.28289 1.07503 1.09841  
H -2.36715 -0.56112 3.36360  
H -1.57933 0.97705 2.95739  
H -0.59198 -0.47468 3.25626  
H -1.41484 -3.52733 1.93562  
H 0.00261 -2.56468 2.39603  
H 0.03223 -3.54399 0.90174  
H 1.37470 -2.08595 -1.89170  
H 1.67439 0.18555 0.57372  
H 2.28761 3.74811 -0.76599  
H 1.94412 2.49130 -2.00573

H 2.92718 2.08560 -0.55925  
H -0.30333 4.43521 -0.66273  
H -1.65708 3.34101 -0.22700  
H -0.84961 3.16613 -1.81414  
H 1.63035 2.29249 2.16171  
H -0.09717 2.73552 2.29290  
H 1.08078 3.92789 1.65042  
H 0.76063 -0.07145 -1.75271  
H 3.87226 -1.86117 1.89168  
H 2.13889 -2.25947 1.66415  
H 3.37837 -3.01295 0.60640  
H 5.41168 -0.37657 0.03833  
H 4.91366 -1.52454 -1.25954  
H 4.72929 0.24630 -1.50337

INT(11''-6)<sub>Me</sub>

SCF Energy = -740.022532657  
Enthalpy 0K = -739.589577  
Enthalpy 298K = -739.559005  
Free Energy 298K = -739.648177  
SCF(DCM) = -740.073251311  
SCF(BP86-D3) = -0.07449256  
Lowest Frequencies = 21.2231  
22.1635 cm<sup>-1</sup>  
C -2.31834 0.03166 0.87114  
C -1.73038 -1.23046 1.26487  
C -1.50426 -2.02107 0.06541  
C -1.98514 -1.25624 -1.06727  
C -2.47670 0.01435 -0.58423  
Rh -0.27892 -0.11084 -0.05181  
P 0.42036 2.12478 -0.09324  
C 1.66467 2.50522 -1.42181  
C -1.49276 -1.68766 2.67454  
C -1.01497 -3.43868 0.02385  
C -2.03015 -1.73023 -2.48995  
C -3.23871 1.01353 -1.40839  
C -2.88796 1.05159 1.81675  
B 1.67490 -1.09835 -0.25194  
P 3.53852 -0.73970 -0.48191  
C 4.27398 0.52631 0.69616  
C 4.43133 -2.31289 0.00521  
C -0.85247 3.44553 -0.40751  
C 1.20545 2.71968 1.48559  
H -1.19077 -2.40181 -2.72605  
H -2.01244 -0.89161 -3.20249  
H -2.96480 -2.29527 -2.66583  
H -4.27587 0.65975 -1.55722  
H -2.79502 1.15117 -2.40731  
H -3.29893 1.99579 -0.91809  
H -2.99256 2.04193 1.34879  
H -2.27260 1.15988 2.72327  
H -3.89859 0.74007 2.14026  
H -2.40153 -2.18663 3.06089  
H -1.26762 -0.84638 3.34760  
H -0.66682 -2.41193 2.73771  
H -1.86713 -4.13562 0.12541  
H -0.30945 -3.65359 0.84105  
H -0.50855 -3.66831 -0.92615  
H 1.50183 -2.28348 -0.40053  
H 1.17334 -0.46331 0.84814  
H 2.05036 3.53166 -1.30976

H 1.16898 2.40647 -2.40043  
H 2.49800 1.78724 -1.38932  
H -0.35218 4.42766 -0.43606  
H -1.60533 3.45630 0.39454  
H -1.34815 3.26655 -1.37289  
H 2.05146 2.06871 1.74839  
H 0.46000 2.66701 2.29428  
H 1.55520 3.75985 1.37907  
H 0.93244 -0.42110 -1.23165  
H 5.36616 0.52631 0.55351  
H 3.90971 1.53789 0.46365  
H 4.05358 0.28415 1.74878  
H 5.49653 -2.21779 -0.25674  
H 4.33937 -2.52128 1.08331  
H 4.00370 -3.15052 -0.56563

TS(11''-6)<sub>4Me</sub>

SCF Energy = -739.995443753  
Enthalpy 0K = -739.563791  
Enthalpy 298K = -739.533160  
Free Energy 298K = -739.622749  
SCF(DCM) = -740.046395105  
SCF(BP86-D3) = -0.07300416  
Lowest Frequencies = -173.6894  
11.2934 cm<sup>-1</sup>  
C 2.24928 0.27007 0.87982  
C 2.37040 0.36127 -0.57874  
C 2.07412 -0.95602 -1.13714  
C 1.75604 -1.83938 -0.04830  
C 1.85614 -1.07660 1.19555  
Rh 0.26987 -0.10226 -0.12207  
P -0.78680 1.99656 0.05908  
C -2.06279 2.39439 -1.23574  
C 2.96699 1.50069 -1.34828  
C 2.15499 -1.33417 -2.58596  
C 1.49836 -3.31348 -0.15237  
C 1.66537 -1.63827 2.57142  
C 2.68287 1.30705 1.87824  
B -1.54004 -1.45608 -0.99522  
P -3.04351 -0.84554 0.00902  
C -4.65846 -0.75294 -0.93065  
C -3.39991 -2.00061 1.43469  
C -1.65562 2.34474 1.66982  
C 0.31366 3.49455 -0.09668  
H 1.04940 -3.58205 -1.12033  
H 0.82756 -3.67357 0.64306  
H 2.45187 -3.86561 -0.05887  
H 2.61331 -2.08642 2.92677  
H 0.90475 -2.43391 2.58923  
H 1.37674 -0.86203 3.29647  
H 2.05946 1.29511 2.78605  
H 2.66164 2.32337 1.45813  
H 3.72450 1.11062 2.19328  
H 4.05092 1.32198 -1.48368  
H 2.85900 2.46058 -0.82352  
H 2.52598 1.59566 -2.35311  
H 3.15826 -1.73743 -2.81826  
H 1.98306 -0.46853 -3.24349  
H 1.41717 -2.11064 -2.84194  
H -1.62068 -1.92786 -2.10690  
H -0.79179 -0.35173 -1.42618

H -2.49092 3.39168 -1.04477  
H -2.86526 1.64409 -1.21141  
H -1.58497 2.38304 -2.22736  
H -2.02259 3.38464 1.68843  
H -0.95908 2.18799 2.50801  
H -2.49646 1.64256 1.76738  
H 0.82617 3.48741 -1.07006  
H 1.06017 3.51343 0.71089  
H -0.30408 4.40477 -0.02524  
H -0.93325 -2.09300 -0.14158  
H -4.14924 -1.55259 2.10489  
H -3.77787 -2.96643 1.06035  
H -2.47113 -2.17027 1.99953  
H -5.44684 -0.29284 -0.31523  
H -4.52030 -0.15366 -1.84380  
H -4.97330 -1.76914 -1.22340

TS (11''-9')<sub>2</sub>Me

SCF Energy = -740.014758479  
Enthalpy 0K = -739.580432  
Enthalpy 298K = -739.551075  
Free Energy 298K = -739.635787  
SCF(DCM) = -740.064895108  
SCF(BP86-D3) = -0.07796614  
Lowest Frequencies = -123.2787  
20.8173 cm-1

C -2.36490 0.26502 0.22712  
C -1.83153 -0.52505 1.29707  
C -1.31178 -1.75846 0.71824  
C -1.49367 -1.72742 -0.70560  
C -2.10229 -0.44008 -1.03615  
Rh -0.17168 0.09002 -0.24686  
P 2.53817 -0.60566 0.09149  
C 3.57440 -0.07273 -1.35438  
C -1.92889 -0.23920 2.77015  
C -0.83739 -2.92065 1.54263  
C -1.29539 -2.86186 -1.67313  
C -2.65425 -0.05375 -2.37945  
C -3.21041 1.49919 0.35537  
B 1.80962 1.17175 0.99965  
P 0.50693 2.22938 0.02626  
C -0.40771 3.41418 1.12099  
C 1.17650 3.26595 -1.35658  
C 3.76945 -0.99950 1.44074  
C 2.09261 -2.35042 -0.41291  
H -0.55986 -3.59611 -1.31060  
H -0.96220 -2.50472 -2.66019  
H -2.24814 -3.40265 -1.82420  
H -3.68175 -0.44795 -2.49435  
H -2.04540 -0.46179 -3.20024  
H -2.70098 1.03892 -2.50355  
H -3.08307 2.18022 -0.50029  
H -3.00239 2.05650 1.28086  
H -4.27695 1.20717 0.38309  
H -2.76718 -0.79971 3.22444  
H -2.10800 0.82892 2.96779  
H -1.01164 -0.53119 3.30655  
H -1.69831 -3.36546 2.07607  
H -0.11265 -2.61720 2.31683  
H -0.39223 -3.71876 0.93031  
H 1.58209 0.98867 2.16712

H 0.52007 0.20119 -1.66959  
H 4.33044 -0.84689 -1.56050  
H 4.07731 0.87922 -1.13149  
H 2.92927 0.04597 -2.23780  
H 4.47200 -1.77179 1.08918  
H 3.22937 -1.37684 2.32319  
H 4.31749 -0.09026 1.72531  
H 1.47383 -2.32278 -1.31886  
H 1.54677 -2.84845 0.39916  
H 3.03031 -2.89910 -0.60682  
H 2.91897 1.57786 0.72772  
H -1.27492 3.84207 0.59407  
H -0.74560 2.88154 2.02145  
H 0.27203 4.22975 1.41674  
H 1.76527 4.10596 -0.95328  
H 1.81356 2.63964 -1.99691  
H 0.34498 3.66099 -1.96176

9'<sub>Me</sub>

SCF Energy = -740.034877218  
Enthalpy 0K = -739.601345  
Enthalpy 298K = -739.570960  
Free Energy 298K = -739.659266  
SCF(DCM) = -740.085920998  
SCF(BP86-D3) = -0.07330278  
Lowest Frequencies = 19.8874  
40.8438 cm-1

C -2.36032 0.45713 0.96691  
C -2.05570 -0.89229 1.26962  
C -2.07929 -1.67999 0.01376  
C -2.39715 -0.80705 -1.06394  
C -2.48033 0.55757 -0.50484  
Rh -0.47308 -0.06309 -0.23435  
P 3.31546 -0.65840 0.07106  
C 3.67446 -0.70826 -1.74213  
C -1.83257 -1.47852 2.63299  
C -1.91629 -3.17083 -0.05761  
C -2.68203 -1.18402 -2.49031  
C -2.93966 1.77130 -1.25288  
C -2.62691 1.56821 1.94030  
B 2.75075 1.04906 0.80638  
P 1.03020 1.69342 0.05285  
C 0.53370 3.05162 1.23181  
C 1.40133 2.66094 -1.49799  
C 4.85430 -1.26074 0.90017  
C 2.04569 -1.97503 0.35807  
H -2.16326 -2.11037 -2.78011  
H -2.37480 -0.39216 -3.18984  
H -3.76669 -1.34994 -2.62709  
H -4.04643 1.80749 -1.26373  
H -2.59785 1.75934 -2.29900  
H -2.58551 2.69973 -0.77886  
H -2.32350 2.54902 1.54389  
H -2.10650 1.41046 2.89762  
H -3.70964 1.62528 2.15899  
H -2.76875 -1.92655 3.01594  
H -1.50808 -0.71671 3.35810  
H -1.07752 -2.28108 2.61638  
H -2.86561 -3.67099 0.21182  
H -1.15112 -3.53674 0.64597  
H -1.64263 -3.50533 -1.06993

H 2.58745 0.82698 1.99062  
H 0.20832 -0.03527 -1.66635  
H 4.05357 -1.69979 -2.03541  
H 4.42836 0.05755 -1.98161  
H 2.74906 -0.49203 -2.29838  
H 5.14389 -2.25042 0.51441  
H 4.68111 -1.31894 1.98553  
H 5.66470 -0.54002 0.71116  
H 1.09830 -1.67798 -0.16184  
H 1.86025 -2.06896 1.43880  
H 2.35978 -2.94693 -0.05549  
H 3.61606 1.86990 0.57506  
H -0.32380 3.61577 0.83206  
H 0.26801 2.61605 2.20575  
H 1.38473 3.73897 1.36567  
H 2.13423 3.45319 -1.27562  
H 1.81194 1.98573 -2.26307  
H 0.47662 3.11264 -1.88995

TS (9'-9)<sub>Me</sub>

SCF Energy = -740.033379540  
Enthalpy 0K = -739.600573  
Enthalpy 298K = -739.570433  
Free Energy 298K = -739.659330  
SCF(DCM) = -740.084485369  
SCF(BP86-D3) = -0.06942391  
Lowest Frequencies = -71.8798  
13.3292 cm-1

C -2.64207 0.76112 0.49293  
C -2.42824 -0.37642 1.31022  
C -2.30246 -1.56322 0.43162  
C -2.46449 -1.15824 -0.92355  
C -2.57359 0.31093 -0.91906  
Rh -0.64858 -0.10384 -0.15843  
P 0.98305 1.49907 0.04996  
C 0.62734 2.98351 1.12231  
C -2.41200 -0.42858 2.81041  
C -2.11375 -2.96352 0.93438  
C -2.56686 -2.04208 -2.13483  
C -2.88173 1.16075 -2.11358  
C -2.97582 2.15515 0.93894  
B 2.35761 0.47768 1.06677  
P 3.65496 -0.61768 0.10901  
C 4.73989 0.26731 -1.10120  
C 1.66663 2.28607 -1.49603  
C 4.82258 -1.32793 1.35525  
C 2.96173 -2.07274 -0.79581  
H -2.03563 -2.99535 -1.99105  
H -2.14990 -1.55628 -3.02990  
H -3.62638 -2.27856 -2.34468  
H -3.97595 1.19194 -2.28107  
H -2.41547 0.75983 -3.02641  
H -2.53834 2.19759 -1.97522  
H -2.57726 2.91653 0.24994  
H -2.58937 2.36823 1.94726  
H -4.07350 2.28776 0.96923  
H -3.37378 -0.81865 3.19295  
H -2.25851 0.56761 3.25246  
H -1.62002 -1.09490 3.18988  
H -3.07283 -3.36577 1.31188  
H -1.39795 -3.00233 1.77200

H -1.75796 -3.63910 0.14202  
H 1.79829 -0.30459 1.81933  
H 0.21663 -0.43516 -1.45089  
H 5.54020 -0.40190 -1.45382  
H 5.18847 1.14350 -0.60825  
H 4.14660 0.60678 -1.96304  
H 5.56851 -1.97206 0.86398  
H 4.25177 -1.91507 2.09070  
H 5.33096 -0.50439 1.87953  
H 2.24244 -1.72613 -1.55381  
H 2.42644 -2.71006 -0.07465  
H 3.76403 -2.65519 -1.27506  
H 3.02170 1.28436 1.69182  
H 1.53733 3.59706 1.22431  
H -0.17629 3.59405 0.68193  
H 0.31803 2.63870 2.12042  
H 2.57292 2.87066 -1.26919  
H 1.89230 1.50426 -2.23603  
H 0.90726 2.95747 -1.92782

9<sub>Me</sub>

SCF Energy = -740.051459135  
Enthalpy 0K = -739.618276  
Enthalpy 298K = -739.587595  
Free Energy 298K = -739.677850  
SCF(DCM) = -740.101774541  
SCF(BP86-D3) = -0.06979090  
Lowest Frequencies = 10.5148  
27.8475 cm-1

C -2.15056 -0.68844 1.31074  
C -2.05008 -1.66005 0.21286  
C -2.37057 -0.98393 -1.01445  
C -2.59811 0.42579 -0.70298  
C -2.51369 0.57700 0.75569  
Rh -0.52778 -0.02961 -0.19877  
P 0.94748 1.70514 -0.00468  
C 0.73374 3.07308 1.23411  
C -1.81920 -3.13638 0.37855  
C -2.54912 -1.62196 -2.36456  
C -3.11364 1.46185 -1.66291  
C -2.85964 1.82349 1.52164  
C -2.00340 -1.02221 2.76904  
B 1.70368 0.09564 0.77897  
P 3.33762 -0.71140 0.08017  
C 4.83222 0.32908 0.39549  
C 1.74199 2.52901 -1.47139  
C 3.66065 -2.31885 0.93435  
C 3.32809 -1.09281 -1.72574  
H -2.72512 1.30068 -2.68020  
H -2.83522 2.48034 -1.35102  
H -4.21799 1.42100 -1.71636  
H -3.94746 1.85777 1.71775  
H -2.60160 2.73696 0.96333  
H -2.35069 1.86133 2.49744  
H -1.75618 -0.13429 3.37106  
H -1.21793 -1.77571 2.93923  
H -2.94764 -1.43897 3.16609  
H -2.77599 -3.65575 0.57389  
H -1.15141 -3.35416 1.22692  
H -1.37944 -3.58265 -0.52679  
H -3.60133 -1.93627 -2.49395

H -1.91803 -2.51593 -2.48285  
H -2.30736 -0.92412 -3.18028  
H 0.86211 -0.89421 0.50010  
H 0.18975 -0.16909 -1.60554  
H 5.74336 -0.20109 0.07715  
H 4.89490 0.55253 1.47161  
H 4.74765 1.27472 -0.16131  
H 4.60119 -2.76811 0.57898  
H 2.82603 -3.00839 0.73443  
H 3.72282 -2.14062 2.01881  
H 3.33012 -0.15581 -2.30245  
H 2.41100 -1.65278 -1.96540  
H 4.21462 -1.68762 -1.99503  
H 1.82169 0.16378 1.98199  
H 1.69726 3.56732 1.43903  
H 0.02058 3.82065 0.85154  
H 0.34095 2.64097 2.16578  
H 2.69403 3.01179 -1.19596  
H 1.90381 1.78656 -2.26589  
H 1.05444 3.29921 -1.85734

H<sub>3</sub>BP<sup>+</sup>Bu<sub>2</sub>H

SCF Energy = -349.511556760  
Enthalpy 0K = -349.233577  
Enthalpy 298K = -349.217395  
Free Energy 298K = -349.272823  
SCF(DCM) = -349.408812655  
SCF(BP86-D3) = -0.03960832  
Lowest Frequencies = 59.6393  
75.2490 cm<sup>-1</sup>

C 1.61133 -0.29226 0.01337  
P -0.00239 0.63183 -0.44634  
C -1.61690 -0.28954 0.01490  
B 0.01140 2.51628 0.09682  
H -0.82936 3.06237 -0.59323  
H -0.27153 2.49567 1.28549  
H 1.14387 2.91341 -0.11928  
H -0.00820 0.43219 -1.87032  
C 1.54823 -1.81758 -0.19184  
C 2.68672 0.30463 -0.92744  
C 1.96756 0.04149 1.47965  
C -1.80016 -1.59805 -0.78135  
C -1.64874 -0.55649 1.53459  
C -2.75624 0.68985 -0.35928  
H 3.67630 -0.10208 -0.64877  
H 2.49999 0.03896 -1.98260  
H 2.73405 1.40264 -0.84783  
H 2.55216 -2.24705 -0.01471  
H 0.85706 -2.30689 0.51402  
H 1.24921 -2.08770 -1.21893  
H 2.95605 -0.39088 1.72106  
H 2.01655 1.12965 1.64536  
H 1.23658 -0.38014 2.18948  
H -2.79320 -2.02674 -0.54989  
H -1.76378 -1.42054 -1.87017  
H -1.04582 -2.35905 -0.53185  
H -2.64293 -0.94957 1.81652  
H -0.89952 -1.30517 1.84289  
H -1.47610 0.36824 2.11003  
H -3.72710 0.21541 -0.12372  
H -2.68218 1.63579 0.19859

H -2.75397 0.93034 -1.43682

10<sub>CptBu</sub>

SCF Energy = -819.812758782  
Enthalpy 0K = -819.301804  
Enthalpy 298K = -819.269063  
Free Energy 298K = -819.362518  
SCF(DCM) = -819.861215310  
SCF(BP86-D3) = -0.09135497  
Lowest Frequencies = 20.8444  
30.8038 cm<sup>-1</sup>

C 3.04424 -0.74712 -1.84346  
C 1.80973 -1.32450 -2.22166  
C 1.52093 -2.41305 -1.29799  
C 2.59909 -2.51256 -0.37413  
C 3.52757 -1.44288 -0.65627  
Rh 1.64504 -0.49054 -0.03963  
C 1.62986 -0.86302 2.04487  
H 1.17593 -1.00589 -3.04831  
H 0.64850 -3.06526 -1.33706  
H 2.68863 -3.23573 0.43645  
H 4.48438 -1.28138 -0.15971  
H 3.54714 0.07873 -2.34682  
B -0.68731 0.43165 -0.55387  
P -2.48150 0.32306 0.29102  
C -3.76749 1.26903 -0.77566  
C -4.99420 1.65217 0.08108  
P 2.30002 1.65495 0.49828  
C 1.30402 2.57060 1.77194  
C -3.00187 -1.42210 0.87743  
C -2.11195 -1.72148 2.10772  
C -4.48413 -1.50179 1.29507  
C -2.70047 -2.43508 -0.24906  
C 4.03174 1.77319 1.16517  
C 2.32431 2.82733 -0.94554  
C -3.07805 2.56328 -1.26866  
C -4.18094 0.40492 -1.98598  
H -0.80313 -0.11693 -1.62431  
H -2.52711 1.07136 1.51386  
H -2.31923 -1.03304 2.94469  
H -1.03721 -1.67282 1.87032  
H -2.32920 -2.74577 2.46015  
H -4.67352 -2.50284 1.72284  
H -5.17103 -1.37964 0.44285  
H -4.74263 -0.76033 2.06930  
H -1.64065 -2.40400 -0.54991  
H -3.31869 -2.26409 -1.14499  
H -2.92060 -3.45358 0.11722  
H -5.68614 2.24487 -0.54381  
H -4.71361 2.27796 0.94513  
H -5.55091 0.77927 0.45011  
H -2.23646 2.35569 -1.94668  
H -2.70922 3.18422 -0.43391  
H -3.82310 3.16322 -1.82124  
H -3.31178 0.09273 -2.58876  
H -4.84093 1.00207 -2.63980  
H -4.74410 -0.49399 -1.68734  
H 1.69199 3.59641 1.87939  
H 1.37397 2.05495 2.74094  
H 0.25216 2.60685 1.45292  
H 4.28668 2.82091 1.39398

|   |          |          |          |
|---|----------|----------|----------|
| H | 4.74091  | 1.38408  | 0.41859  |
| H | 4.11495  | 1.17017  | 2.08234  |
| H | 1.32454  | 2.85601  | -1.40319 |
| H | 3.04780  | 2.47273  | -1.69520 |
| H | 2.61246  | 3.83834  | -0.61360 |
| H | 2.65705  | -0.81797 | 2.44301  |
| H | 0.99469  | -0.15782 | 2.60255  |
| H | 1.23900  | -1.88194 | 2.19677  |
| H | -0.02016 | -0.21039 | 0.37653  |
| H | -0.46378 | 1.61700  | -0.61135 |

10<sub>CpPh</sub>

SCF Energy = -967.407307566  
 Enthalpy 0K = -966.958313  
 Enthalpy 298K = -966.927077  
 Free Energy 298K = -967.022294  
 SCF(DCM) = -967.455106886  
 SCF(BP86-D3) = -0.07788565  
 Lowest Frequencies = 10.8154  
 23.1201 cm<sup>-1</sup>

|    |          |          |          |
|----|----------|----------|----------|
| C  | 3.22405  | -2.50018 | -0.65065 |
| C  | 3.41868  | -1.35479 | 0.14813  |
| C  | 4.72259  | -0.95111 | 0.51106  |
| C  | 5.82458  | -1.70050 | 0.07709  |
| C  | 5.63157  | -2.84382 | -0.71825 |
| C  | 4.33553  | -3.24165 | -1.08190 |
| P  | 1.96181  | -0.39810 | 0.72863  |
| C  | 2.31387  | 1.39044  | 0.50487  |
| C  | 2.11635  | 2.28970  | 1.57356  |
| C  | 2.31968  | 3.66517  | 1.37575  |
| C  | 2.72017  | 4.14388  | 0.11761  |
| C  | 2.92320  | 3.24751  | -0.94673 |
| C  | 2.71988  | 1.87171  | -0.75877 |
| B  | 0.26319  | -1.02474 | -0.05418 |
| Rh | -1.91286 | 0.30423  | -0.03544 |
| P  | -2.99947 | -1.68796 | 0.37275  |
| C  | -2.76469 | -2.94554 | -0.97706 |
| C  | -2.93839 | 0.76218  | -2.04280 |
| C  | -1.57348 | 1.09206  | -2.21480 |
| C  | -1.23518 | 2.13034  | -1.25150 |
| C  | -2.41117 | 2.45444  | -0.51645 |
| C  | -3.46668 | 1.56900  | -0.94906 |
| H  | -3.50045 | 0.03004  | -2.62337 |
| H  | -0.88759 | 0.63944  | -2.93030 |
| H  | -0.25616 | 2.59611  | -1.13564 |
| H  | -2.49115 | 3.20117  | 0.27341  |
| H  | -4.50330 | 1.59826  | -0.61360 |
| C  | -2.12713 | 0.73575  | 2.02713  |
| C  | -2.56731 | -2.63118 | 1.91363  |
| C  | -4.84773 | -1.52594 | 0.49483  |
| H  | 0.38777  | -0.87466 | -1.24483 |
| H  | 1.97670  | -0.51403 | 2.15619  |
| H  | -3.09833 | -3.59686 | 1.91577  |
| H  | -2.86438 | -2.05390 | 2.80158  |
| H  | -1.48229 | -2.80949 | 1.94219  |
| H  | -5.31074 | -2.51352 | 0.65457  |
| H  | -5.24187 | -1.08746 | -0.43462 |
| H  | -5.10338 | -0.86443 | 1.33676  |
| H  | -1.68940 | -3.15174 | -1.08546 |
| H  | -3.14419 | -2.53841 | -1.92674 |
| H  | -3.30209 | -3.87771 | -0.73646 |

|   |          |          |          |
|---|----------|----------|----------|
| H | -3.18768 | 0.91853  | 2.26459  |
| H | -1.74222 | -0.06782 | 2.67281  |
| H | -1.55024 | 1.65334  | 2.22430  |
| H | -0.45571 | -0.21912 | 0.68751  |
| H | 0.11775  | -2.16893 | 0.31633  |
| H | 1.81446  | 1.92123  | 2.55998  |
| H | 2.17543  | 4.35966  | 2.20909  |
| H | 2.88562  | 5.21528  | -0.03186 |
| H | 3.24929  | 3.61895  | -1.92318 |
| H | 2.89331  | 1.17558  | -1.58623 |
| H | 4.87727  | -0.05518 | 1.12126  |
| H | 6.83547  | -1.39035 | 0.35863  |
| H | 6.49567  | -3.42423 | -1.05614 |
| H | 4.18646  | -4.13016 | -1.70291 |
| H | 2.21348  | -2.81025 | -0.93266 |

10<sub>CpMe</sub>

SCF Energy = -583.946330241  
 Enthalpy 0K = -583.601214  
 Enthalpy 298K = -583.576257  
 Free Energy 298K = -583.654670  
 SCF(DCM) = -583.999216628  
 SCF(BP86-D3) = -0.05451190  
 Lowest Frequencies = 23.2670  
 35.0103 cm<sup>-1</sup>

|    |          |          |          |
|----|----------|----------|----------|
| C  | 1.18168  | -2.64071 | 0.57415  |
| C  | 2.27962  | -1.87765 | 0.02970  |
| C  | 1.94433  | -1.55624 | -1.35255 |
| C  | 0.64182  | -2.04179 | -1.61743 |
| C  | 0.15658  | -2.69839 | -0.41269 |
| Rh | 0.56268  | -0.50570 | 0.14921  |
| B  | -1.62822 | 0.47764  | -0.68488 |
| P  | -3.40482 | 0.50804  | 0.15454  |
| C  | -4.68766 | 1.14901  | -1.01065 |
| H  | 3.23717  | -1.69768 | 0.51774  |
| H  | 2.59030  | -1.03390 | -2.05888 |
| H  | 0.09087  | -1.93532 | -2.55136 |
| H  | -0.81091 | -3.18833 | -0.30228 |
| H  | 1.13133  | -3.05440 | 1.58130  |
| P  | 1.51391  | 1.58958  | -0.04353 |
| C  | 3.27930  | 1.67612  | 0.53190  |
| C  | 0.44873  | -0.14925 | 2.23527  |
| C  | 1.60178  | 2.22432  | -1.79014 |
| C  | 0.71160  | 2.99439  | 0.87093  |
| C  | -4.02655 | -1.10427 | 0.81002  |
| H  | -1.75546 | -0.30363 | -1.59818 |
| H  | -3.50512 | 1.38464  | 1.28134  |
| H  | 1.22001  | 3.93834  | 0.61656  |
| H  | 0.78399  | 2.82733  | 1.95563  |
| H  | -0.34749 | 3.06034  | 0.58121  |
| H  | 3.67123  | 2.69940  | 0.41346  |
| H  | 3.89662  | 0.98300  | -0.05969 |
| H  | 3.33321  | 1.38593  | 1.59211  |
| H  | 0.58499  | 2.28828  | -2.20577 |
| H  | 2.19353  | 1.53056  | -2.40628 |
| H  | 2.07244  | 3.22128  | -1.81116 |
| H  | 1.46107  | -0.17189 | 2.66925  |
| H  | -0.03267 | 0.80868  | 2.48302  |
| H  | -0.14714 | -0.96578 | 2.67369  |
| H  | -1.01268 | 0.11212  | 0.41463  |
| H  | -1.42508 | 1.62624  | -1.00900 |

H -5.67368 1.18265 -0.52340  
H -4.40046 2.15881 -1.34017  
H -4.72864 0.48666 -1.88918  
H -5.02713 -0.98615 1.25242  
H -4.07467 -1.82838 -0.01810  
H -3.32881 -1.47806 1.57482

10<sub>CpCy</sub>

SCF Energy = -974.667447188  
Enthalpy 0K = -974.082075  
Enthalpy 298K = -974.048311  
Free Energy 298K = -974.146746  
SCF(DCM) = -974.714671553  
SCF(BP86-D3) = -0.09931083  
Lowest Frequencies = 18.1021  
26.3994 cm<sup>-1</sup>

C -3.62612 -1.26901 1.47581  
C -3.02131 -1.56867 0.08255  
C -4.11442 -1.88963 -0.96401  
C -4.98147 -3.07117 -0.47689  
C -5.58908 -2.79756 0.91196  
C -4.49890 -2.45331 1.94437  
P -1.78998 -0.24594 -0.44690  
C -2.42232 1.48778 -0.11844  
C -3.78199 1.78374 -0.79549  
C -4.24012 3.23112 -0.51265  
C -3.17505 4.25847 -0.93479  
C -1.82528 3.96441 -0.25668  
C -1.34826 2.52317 -0.53814  
B -0.04109 -0.73517 0.33103  
Rh 2.29003 0.26896 0.24954  
C 2.27710 1.38324 -1.55154  
C 3.18901 2.04956 1.31697  
C 4.14735 0.97591 1.20261  
C 3.67585 -0.11984 2.04049  
C 2.42300 0.24704 2.58729  
C 2.10791 1.58920 2.12203  
H 3.26042 3.02160 0.82884  
H 5.11025 1.02951 0.69451  
H 4.20050 -1.05983 2.21331  
H 1.79523 -0.36671 3.23225  
H 1.21332 2.15670 2.37907  
P 2.97371 -1.53182 -1.01789  
C 2.03631 -1.89014 -2.58149  
C 4.73439 -1.41053 -1.60327  
C 2.93319 -3.16014 -0.12024  
H -0.19276 -0.61137 1.52414  
H -1.79951 -0.32419 -1.87937  
H 2.41371 -2.81890 -3.03910  
H 2.16387 -1.06056 -3.29218  
H 0.96862 -2.00612 -2.34370  
H 5.00411 -2.29097 -2.20900  
H 5.40684 -1.34997 -0.73360  
H 4.85453 -0.49932 -2.20893  
H 1.90564 -3.35896 0.21870  
H 3.59340 -3.11089 0.75868  
H 3.27071 -3.97285 -0.78446  
H 3.31106 1.54484 -1.89736  
H 1.69772 0.89874 -2.35193  
H 1.81634 2.35867 -1.32972  
H 0.66529 0.17022 -0.30479

H 0.11533 -1.87551 -0.04864  
H -2.54569 1.53004 0.98275  
H -3.68191 1.63959 -1.88946  
H -4.55224 1.07347 -0.44908  
H -5.19326 3.42009 -1.03688  
H -4.45058 3.34054 0.56922  
H -3.04783 4.22672 -2.03478  
H -3.51171 5.28035 -0.68812  
H -1.05461 4.67812 -0.59806  
H -1.92406 4.10595 0.83767  
H -1.14405 2.41449 -1.62225  
H -0.39671 2.32444 -0.01409  
H -2.36846 -2.45963 0.18124  
H -4.75850 -1.00449 -1.12218  
H -3.65602 -2.12885 -1.94078  
H -5.77585 -3.27238 -1.21682  
H -4.35519 -3.98375 -0.43233  
H -6.30457 -1.95489 0.83980  
H -6.17108 -3.67217 1.25086  
H -4.95141 -2.21144 2.92204  
H -3.85076 -3.33650 2.10725  
H -4.25310 -0.35824 1.41910  
H -2.82769 -1.06838 2.21307

TS(11''-9')<sub>1CpTBu</sub>

SCF Energy = -779.272006001  
Enthalpy 0K = -778.808104  
Enthalpy 298K = -778.778505  
Free Energy 298K = -778.864039  
SCF(DCM) = -779.324066383  
SCF(BP86-D3) = -0.08675788  
Lowest Frequencies = -109.9345  
29.1101 cm<sup>-1</sup>

C -1.31404 -2.76606 -0.40413  
C -1.97626 -2.01357 -1.41002  
C -3.00673 -1.23757 -0.74012  
C -3.06388 -1.66114 0.66303  
C -2.00865 -2.56042 0.86506  
Rh -1.13159 -0.46385 -0.07386  
P -1.90408 1.70174 0.23445  
C -1.23409 2.55156 1.75683  
H -1.75011 -1.99870 -2.47487  
H -3.74015 -0.60874 -1.24568  
H -3.77749 -1.31725 1.41065  
H -1.73523 -3.02170 1.81549  
H -0.48478 -3.45409 -0.56602  
B 0.31833 0.02586 -1.59550  
P 1.66050 0.04942 -0.10760  
C 2.55245 -1.62424 0.36467  
C 1.69742 -2.28445 1.46506  
C 2.82286 1.62174 -0.16929  
C 1.96397 2.85499 -0.50704  
C 3.54471 1.86341 1.17108  
C 3.81161 1.37606 -1.33193  
C -1.74464 2.95984 -1.12400  
C -3.73450 1.79411 0.58878  
C 2.60198 -2.49460 -0.90972  
C 3.98160 -1.44437 0.91887  
H 0.53355 -0.89695 -2.34594  
H 0.90860 0.29000 1.12529  
H 1.23715 3.09388 0.28591

H 1.43408 2.73704 -1.46367  
H 2.63917 3.72458 -0.59938  
H 4.09957 2.81653 1.09915  
H 4.27577 1.08210 1.41593  
H 2.83628 1.95932 2.01155  
H 3.28412 1.22759 -2.28883  
H 4.47554 0.51512 -1.16058  
H 4.45528 2.26738 -1.43920  
H 2.06233 -3.31275 1.63880  
H 0.63284 -2.34587 1.18821  
H 1.77055 -1.73473 2.41872  
H 3.21764 -2.03386 -1.69998  
H 1.60246 -2.67945 -1.33139  
H 3.05618 -3.46920 -0.65726  
H 4.66896 -0.95689 0.21132  
H 4.38891 -2.45199 1.11763  
H 3.99760 -0.89812 1.87445  
H -1.64541 3.57129 1.84018  
H -0.13608 2.60468 1.72596  
H -1.52881 1.96514 2.64135  
H -2.22613 3.90432 -0.82262  
H -2.23444 2.56539 -2.02767  
H -0.68790 3.14014 -1.35770  
H -3.98412 1.16308 1.45445  
H -4.31574 1.46034 -0.28372  
H -4.00833 2.83769 0.81445  
H 0.29914 1.11961 -2.10952

TS(11''-9')<sub>1CpPh</sub>

SCF Energy = -926.847315762  
Enthalpy 0K = -926.448103  
Enthalpy 298K = -926.419665  
Free Energy 298K = -926.508361  
SCF(DCM) = -926.896783129  
SCF(BP86-D3) = -0.06988083  
Lowest Frequencies = -106.7787  
19.3299 cm<sup>-1</sup>

C 2.21788 2.37654 0.99770  
C 1.56081 1.97518 -0.18561  
C 1.23098 2.92608 -1.17521  
C 1.54563 4.27912 -0.96896  
C 2.19217 4.68034 0.21134  
C 2.53067 3.72968 1.19049  
P 1.14726 0.20187 -0.45715  
C 2.58100 -0.85854 -0.03439  
C 2.70301 -1.43564 1.24781  
C 3.81807 -2.23512 1.54387  
C 4.80300 -2.45907 0.56771  
C 4.67774 -1.88700 -0.71000  
C 3.56780 -1.08710 -1.01831  
Rh -1.37467 -0.63318 -0.38166  
B 0.02681 -0.24306 -1.95716  
C -1.20702 -2.83366 -1.14478  
C -2.47887 -2.44349 -0.60506  
C -2.24393 -2.30506 0.82650  
C -0.97845 -2.97619 1.16138  
C -0.34170 -3.26932 -0.02262  
H -1.01581 -3.05824 -2.19488  
H -3.42494 -2.36377 -1.14159  
H -3.01989 -2.07480 1.56045  
H -0.59914 -3.12719 2.17274

H 0.65641 -3.69237 -0.14564  
P -2.86630 0.93407 0.42265  
C -2.76248 1.40236 2.22125  
C -2.71649 2.56162 -0.46311  
C -4.65560 0.48287 0.19654  
H 0.41012 -0.70993 -2.98871  
H 0.11149 -0.07143 0.64402  
H -3.45160 3.27923 -0.06285  
H -2.90062 2.40676 -1.53720  
H -1.69997 2.96193 -0.32793  
H -5.30296 1.30630 0.54061  
H -4.89054 -0.42455 0.77377  
H -4.84633 0.28653 -0.86958  
H -1.76079 1.80769 2.43213  
H -2.91936 0.50841 2.84411  
H -3.52443 2.15945 2.47064  
H -1.03432 0.44101 -1.95556  
H 1.93176 -1.26766 2.00674  
H 3.91574 -2.68402 2.53710  
H 5.67018 -3.08403 0.80200  
H 5.44446 -2.06509 -1.47001  
H 3.47080 -0.64604 -2.01580  
H 0.74456 2.60963 -2.10392  
H 1.29776 5.01604 -1.73910  
H 2.44286 5.73432 0.36537  
H 3.04322 4.04154 2.10567  
H 2.49771 1.63809 1.75629

TS(11''-9')<sub>1CpMe</sub>

SCF Energy = -543.412642724  
Enthalpy 0K = -543.113760  
Enthalpy 298K = -543.092108  
Free Energy 298K = -543.162934  
SCF(DCM) = -543.470832203  
SCF(BP86-D3) = -0.04558664  
Lowest Frequencies = -23.9695  
30.3135 cm<sup>-1</sup>

C 0.89422 -2.59833 -1.08842  
C -0.37505 -2.68726 -0.35809  
C -0.15168 -2.36652 1.00259  
C 1.23462 -1.92360 1.10233  
C 1.88447 -2.17422 -0.19593  
Rh 0.27697 -0.48226 -0.10633  
B -1.10630 0.69018 1.04112  
P -2.64242 0.62109 -0.20383  
C -3.70840 2.14211 -0.11682  
H -1.31809 -3.01785 -0.79644  
H -0.87435 -2.39024 1.81675  
H 1.74640 -1.65554 2.02787  
H 2.93688 -2.00695 -0.42244  
H 1.02498 -2.80689 -2.15092  
P 1.62240 1.39496 -0.02841  
C 3.29006 1.14582 -0.82110  
C 0.94783 2.86248 -0.95483  
C 2.05723 2.06434 1.64691  
C -3.79695 -0.80914 0.01749  
H -1.52544 0.14601 2.04556  
H -2.34097 0.56638 -1.60748  
H 1.67420 3.69098 -0.91903  
H 0.00465 3.18399 -0.49023  
H 0.76849 2.58770 -2.00612



|   |          |          |          |
|---|----------|----------|----------|
| H | 2.69515  | 2.95748  | 1.54612  |
| H | 2.60189  | 1.29274  | 2.21266  |
| H | 1.13513  | 2.32016  | 2.18808  |
| H | 3.15796  | 0.79234  | -1.85506 |
| H | 3.86018  | 0.39261  | -0.25590 |
| H | 3.85563  | 2.09213  | -0.82568 |
| H | -0.89064 | 1.87839  | 1.19100  |
| H | -4.61028 | -0.77172 | -0.72259 |
| H | -3.24337 | -1.75260 | -0.08887 |
| H | -4.21647 | -0.75654 | 1.03404  |
| H | -4.06771 | 2.25081  | 0.91817  |
| H | -3.10164 | 3.02255  | -0.37493 |
| H | -4.56242 | 2.05993  | -0.80652 |

TS(11''-9')<sub>1</sub><sub>CpCy</sub>

SCF Energy = -934.105699437  
 Enthalpy 0K = -933.570368  
 Enthalpy 298K = -933.539528  
 Free Energy 298K = -933.630596  
 SCF(DCM) = -934.155434764  
 SCF(BP86-D3) = -0.09523345  
 Lowest Frequencies = -136.6890

24.0412 cm<sup>-1</sup>

|    |          |          |          |
|----|----------|----------|----------|
| C  | -0.54023 | 2.98643  | -0.97420 |
| C  | 0.82446  | 2.47656  | -0.47648 |
| C  | 1.14838  | 2.99945  | 0.94162  |
| C  | 1.08085  | 4.54194  | 0.98470  |
| C  | -0.28188 | 5.06161  | 0.49529  |
| C  | -0.60725 | 4.52924  | -0.91256 |
| P  | 1.00642  | 0.59442  | -0.59310 |
| C  | 2.80724  | 0.20919  | -0.16806 |
| C  | 3.44814  | -0.70107 | -1.24017 |
| C  | 4.93809  | -0.94886 | -0.91780 |
| C  | 5.13216  | -1.51076 | 0.50259  |
| C  | 4.48527  | -0.59637 | 1.55931  |
| C  | 2.99011  | -0.35264 | 1.26217  |
| Rh | -1.07930 | -1.07499 | -0.30410 |
| B  | 0.10447  | -0.37629 | -1.98030 |
| C  | -0.27685 | -3.18865 | -0.92829 |
| C  | 0.72014  | -3.26949 | 0.16284  |
| C  | 0.07851  | -3.08224 | 1.36785  |
| C  | -1.33405 | -2.82661 | 1.07363  |
| C  | -1.57982 | -3.13731 | -0.33380 |
| H  | 1.78980  | -3.41847 | 0.00566  |
| H  | -0.07240 | -3.42764 | -1.97245 |
| H  | -2.52612 | -3.39852 | -0.80887 |
| H  | -2.10986 | -2.77325 | 1.83983  |
| H  | 0.52983  | -3.04120 | 2.35980  |
| P  | -3.09542 | -0.13509 | 0.32162  |
| C  | -4.45761 | -1.33187 | 0.74427  |
| C  | -3.14034 | 1.03206  | 1.77412  |
| C  | -3.85191 | 0.83389  | -1.07441 |
| H  | 0.61924  | -0.83729 | -2.95581 |
| H  | 0.09091  | 0.13793  | 0.56625  |
| H  | -4.81461 | 1.26819  | -0.75772 |
| H  | -4.01482 | 0.15844  | -1.92800 |
| H  | -3.16823 | 1.63687  | -1.38467 |
| H  | -5.39789 | -0.77706 | 0.89540  |
| H  | -4.21852 | -1.88118 | 1.66691  |
| H  | -4.59024 | -2.04909 | -0.07956 |
| H  | -2.46994 | 1.88539  | 1.58929  |

|   |          |          |          |
|---|----------|----------|----------|
| H | -2.79099 | 0.49946  | 2.67235  |
| H | -4.16472 | 1.40359  | 1.94386  |
| H | -1.10866 | -0.06727 | -2.01871 |
| H | 3.29324  | 1.20526  | -0.21863 |
| H | 2.90832  | -1.66654 | -1.27101 |
| H | 3.34334  | -0.25155 | -2.24347 |
| H | 5.36477  | -1.63414 | -1.67084 |
| H | 5.49177  | 0.00547  | -1.01449 |
| H | 4.68141  | -2.52120 | 0.56472  |
| H | 6.20744  | -1.63771 | 0.71679  |
| H | 4.59220  | -1.02970 | 2.56925  |
| H | 5.01503  | 0.37623  | 1.57826  |
| H | 2.43135  | -1.30268 | 1.34831  |
| H | 2.55809  | 0.33851  | 2.00860  |
| H | 1.60933  | 2.82421  | -1.18019 |
| H | 0.41364  | 2.57785  | 1.65655  |
| H | 2.14584  | 2.65978  | 1.27256  |
| H | 1.28495  | 4.88709  | 2.01328  |
| H | 1.88592  | 4.95854  | 0.34891  |
| H | -1.07236 | 4.74176  | 1.20343  |
| H | -0.29265 | 6.16517  | 0.49603  |
| H | -1.60821 | 4.86491  | -1.23617 |
| H | 0.11256  | 4.94849  | -1.64179 |
| H | -1.33351 | 2.55948  | -0.32929 |
| H | -0.73452 | 2.63077  | -2.00173 |

INT(11''-9')<sub>CptBu</sub>

SCF Energy = -779.299035241  
 Enthalpy 0K = -778.833314  
 Enthalpy 298K = -778.803671  
 Free Energy 298K = -778.887946  
 SCF(DCM) = -779.350374108  
 SCF(BP86-D3) = -0.09122952  
 Lowest Frequencies = 30.9082

54.1344 cm<sup>-1</sup>

|    |          |          |          |
|----|----------|----------|----------|
| C  | -0.22840 | -2.72089 | 0.65777  |
| C  | -0.87314 | -2.73614 | -0.63746 |
| C  | -2.19318 | -2.24982 | -0.46642 |
| C  | -2.38572 | -1.94382 | 0.94576  |
| C  | -1.17674 | -2.26837 | 1.63524  |
| Rh | -0.78181 | -0.53931 | 0.17654  |
| P  | -2.36966 | 1.15864  | -0.26922 |
| C  | -2.20293 | 2.60362  | -1.43636 |
| H  | -0.42669 | -3.05266 | -1.57906 |
| H  | -2.94252 | -2.15945 | -1.25121 |
| H  | -3.31175 | -1.60879 | 1.41298  |
| H  | -0.99895 | -2.17494 | 2.70635  |
| H  | 0.77566  | -3.07902 | 0.87497  |
| B  | 0.33225  | 0.36192  | -1.81154 |
| P  | 1.46332  | 0.28960  | -0.31674 |
| C  | 2.93514  | -0.98726 | -0.38160 |
| C  | 3.28413  | -1.57996 | 1.00046  |
| C  | 1.99575  | 1.97396  | 0.50045  |
| C  | 2.69094  | 2.82399  | -0.59361 |
| C  | 0.75306  | 2.74076  | 0.98678  |
| C  | 2.92087  | 1.76151  | 1.71730  |
| C  | -3.96720 | 0.45775  | -0.93555 |
| C  | -2.92860 | 1.97714  | 1.30730  |
| C  | 2.56886  | -2.10981 | -1.37399 |
| C  | 4.16932  | -0.25287 | -0.96557 |
| H  | 0.33121  | -0.54984 | -2.59255 |

H -0.45853 0.40427 1.37252  
H 2.01400 3.02146 -1.44048  
H 3.60425 2.35769 -0.98859  
H 2.98097 3.79597 -0.15475  
H 1.07202 3.74431 1.32109  
H 0.26780 2.24230 1.84212  
H 0.01273 2.87811 0.18601  
H 3.89082 1.31559 1.45306  
H 2.44443 1.13844 2.49274  
H 3.13355 2.74668 2.17040  
H 4.07160 -2.34424 0.87108  
H 2.42440 -2.06841 1.48464  
H 3.67389 -0.82623 1.69958  
H 2.34112 -1.71447 -2.37552  
H 1.71877 -2.71881 -1.04092  
H 3.43912 -2.78409 -1.46383  
H 3.95988 0.18566 -1.95502  
H 4.97554 -0.99716 -1.09766  
H 4.56410 0.53200 -0.30380  
H -3.10344 3.22767 -1.31040  
H -2.15113 2.23528 -2.47073  
H -1.31180 3.21144 -1.23325  
H -4.70329 1.27313 -1.02619  
H -4.37508 -0.31482 -0.26835  
H -3.78952 0.02563 -1.93214  
H -2.11032 2.58799 1.71606  
H -3.19400 1.20671 2.04674  
H -3.80187 2.62091 1.11331  
H -0.07464 1.43858 -2.13968

INT(11''-9')<sub>CpPh</sub>  
SCF Energy = -926.919061629  
Enthalpy 0K = -926.515760  
Enthalpy 298K = -926.487422  
Free Energy 298K = -926.573914  
SCF(DCM) = -926.968990490  
SCF(BP86-D3) = -0.07720109  
Lowest Frequencies = 23.3592  
32.4601 cm-1  
C -1.24713 2.35941 -1.26492  
C -1.35301 1.92107 0.07238  
C -1.86851 2.79077 1.05900  
C -2.26434 4.09057 0.70616  
C -2.15552 4.52499 -0.62497  
C -1.64938 3.65961 -1.60964  
P -0.91382 0.21177 0.58702  
C -2.38206 -0.86254 0.32772  
C -3.17848 -0.73304 -0.83096  
C -4.29770 -1.56096 -1.00408  
C -4.62795 -2.51712 -0.02867  
C -3.84244 -2.64068 1.12976  
C -2.72180 -1.81618 1.31375  
Rh 1.10246 -0.71305 -0.21795  
B 0.26700 -0.10862 2.00570  
C 0.48068 -2.89525 -0.02740  
C 1.78528 -2.79163 0.55955  
C 2.68919 -2.36842 -0.47618  
C 1.95033 -2.22492 -1.70205  
C 0.57527 -2.54910 -1.42489  
H -0.43436 -3.18411 0.48995  
H 2.04518 -3.00428 1.59559

H 3.76240 -2.21277 -0.35883  
H 2.36192 -1.94144 -2.67053  
H -0.24290 -2.56212 -2.14414  
P 2.64040 0.95600 0.28175  
C 3.84244 1.16478 -1.12338  
C 2.03854 2.68809 0.54400  
C 3.74180 0.60724 1.73578  
H 0.17635 -1.14358 2.60729  
H 0.78775 0.34675 -1.32887  
H 2.90431 3.34463 0.72923  
H 1.35282 2.73029 1.40139  
H 1.50289 3.02498 -0.35605  
H 4.50240 1.39990 1.82729  
H 4.24059 -0.36247 1.58758  
H 3.13697 0.56219 2.65238  
H 3.29365 1.47615 -2.02531  
H 4.34839 0.20961 -1.32912  
H 4.59541 1.92854 -0.86878  
H 0.82186 0.84096 2.48711  
H -2.93790 0.02145 -1.58678  
H -4.91557 -1.45464 -1.90109  
H -5.50376 -3.15852 -0.16650  
H -4.10888 -3.37110 1.90002  
H -2.12437 -1.89722 2.22748  
H -1.95947 2.45400 2.09677  
H -2.65898 4.76285 1.47420  
H -2.46639 5.53860 -0.89608  
H -1.56807 3.99575 -2.64809  
H -0.84782 1.68909 -2.03406

INT(11''-9')<sub>CpMe</sub>  
SCF Energy = -543.453059312  
Enthalpy 0K = -543.153253  
Enthalpy 298K = -543.131559  
Free Energy 298K = -543.200667  
SCF(DCM) = -543.508822582  
SCF(BP86-D3) = -0.05207579  
Lowest Frequencies = 35.6607  
57.6705 cm-1  
C -0.16140 -2.44540 -1.16791  
C -1.50454 -2.12696 -0.76391  
C -1.51753 -2.03668 0.67880  
C -0.19564 -2.29045 1.16500  
C 0.64289 -2.53431 0.01824  
Rh -0.18200 -0.38953 -0.16611  
P -1.65868 1.40443 0.18988  
C -1.47384 2.93565 -0.83146  
H -2.36526 -2.02659 -1.42435  
H -2.38977 -1.83180 1.29940  
H 0.11348 -2.31287 2.20929  
H 1.70259 -2.79046 0.04817  
H 0.18166 -2.60299 -2.19023  
P 1.91756 0.59771 0.00860  
C 3.05867 -0.04606 -1.31248  
B -0.68655 1.10187 1.75838  
C 2.11214 2.43259 -0.18873  
C 2.81912 0.22071 1.58793  
C -3.44869 0.94781 0.05194  
H -1.16984 0.37638 2.58259  
H -0.10933 0.35870 -1.54343  
H 3.18046 2.68771 -0.09621

H 1.54802 2.96609 0.58950  
H 1.75856 2.73418 -1.18651  
H 3.84121 0.63124 1.54307  
H 2.87042 -0.86923 1.72974  
H 2.27628 0.66614 2.43405  
H 2.65105 0.21027 -2.30227  
H 3.14540 -1.14020 -1.23868  
H 4.05870 0.40393 -1.19991  
H 0.21870 1.84550 2.01793  
H -3.70144 0.67274 -0.98384  
H -3.67312 0.11016 0.72658  
H -4.05411 1.81834 0.35353  
H -2.17524 3.69575 -0.45081  
H -0.45029 3.32343 -0.75030  
H -1.70540 2.71947 -1.88582

INT(11''-9')<sub>cpCy</sub>

SCF Energy = -934.169686541  
Enthalpy 0K = -933.629432  
Enthalpy 298K = -933.598853  
Free Energy 298K = -933.688234  
SCF(DCM) = -934.219828829  
SCF(BP86-D3) = -0.09933082  
Lowest Frequencies = 25.2704  
34.8725 cm<sup>-1</sup>

C 2.03463 -2.44628 -0.89920  
C 2.19944 -1.17290 -0.03466  
C 3.61609 -0.58218 -0.25223  
C 4.69759 -1.63047 0.09707  
C 4.52547 -2.92936 -0.70882  
C 3.10586 -3.49887 -0.54145  
P 0.82107 0.07688 -0.42203  
B -0.31168 -0.22764 -1.87904  
Rh -1.37582 -0.54521 0.32417  
P -2.82430 0.96087 -0.69677  
C -3.64762 0.39730 -2.26509  
C -0.77650 -2.59003 1.19071  
C -1.66394 -2.85388 0.08436  
C -2.91870 -2.24815 0.38955  
C -2.82111 -1.62076 1.69367  
C -1.49543 -1.85042 2.19037  
H 0.25042 -2.94134 1.28279  
H -1.42295 -3.41396 -0.81837  
H -3.81228 -2.28755 -0.23445  
H -3.62548 -1.11887 2.23033  
H -1.10336 -1.52570 3.15386  
C 1.24509 1.85779 0.03595  
C 2.21772 2.54151 -0.95728  
C 2.36575 4.03955 -0.60960  
C 2.81327 4.24076 0.84974  
C 1.84709 3.55077 1.83075  
C 1.67737 2.04964 1.50743  
C -4.28107 1.29183 0.41936  
C -2.26507 2.69289 -1.06243  
H -0.32381 -1.30800 -2.40118  
H -1.08783 0.73640 1.17311  
H -3.10809 3.25142 -1.50093  
H -1.42544 2.69031 -1.77042  
H -1.96002 3.18031 -0.12357  
H -4.40697 1.13695 -2.56791  
H -4.13514 -0.57332 -2.08884

H -2.89849 0.28086 -3.05983  
H -3.92271 1.68440 1.38308  
H -4.84203 0.36194 0.59659  
H -4.95160 2.02979 -0.05088  
H -0.71557 0.73873 -2.46854  
H 0.25367 2.33499 -0.08692  
H 3.21190 2.06325 -0.90809  
H 1.85464 2.41704 -1.99286  
H 3.08424 4.50659 -1.30580  
H 1.39570 4.55041 -0.77128  
H 3.83092 3.82334 0.98221  
H 2.88589 5.31747 1.08211  
H 2.19956 3.66536 2.87087  
H 0.85691 4.04633 1.77942  
H 2.63801 1.53212 1.68994  
H 0.93431 1.59271 2.18702  
H 2.09266 -1.42898 1.03742  
H 3.72472 -0.27902 -1.31124  
H 3.77119 0.31851 0.36373  
H 5.69470 -1.19088 -0.08122  
H 4.64398 -1.85506 1.18052  
H 4.71101 -2.72365 -1.78101  
H 5.27797 -3.67459 -0.39776  
H 2.96685 -4.39100 -1.17709  
H 2.96231 -3.83359 0.50558  
H 2.13858 -2.16358 -1.96351  
H 1.02470 -2.87627 -0.79653

TS(11''-6)<sub>3CptBu</sub>

SCF Energy = -779.249415041  
Enthalpy 0K = -778.789151  
Enthalpy 298K = -778.759263  
Free Energy 298K =  
SCF(DCM) = -779.299386214  
SCF(BP86-D3) = -0.08289262  
Lowest Frequencies = -840.0229  
36.0604 cm<sup>-1</sup>

C -2.88833 -1.47154 0.82754  
C -1.85465 -2.39522 0.43383  
C -1.91093 -2.49020 -0.99832  
C -3.08300 -1.76469 -1.46283  
C -3.68436 -1.14911 -0.35460  
Rh -1.35486 -0.38345 -0.35925  
P -1.75892 1.75317 0.54758  
C -1.60510 3.14067 -0.68067  
H -1.16773 -2.91742 1.09633  
H -1.26391 -3.10623 -1.62289  
H -3.39898 -1.67744 -2.50290  
H -4.57100 -0.51574 -0.37102  
H -3.13817 -1.21120 1.85652  
B 0.51679 -0.66594 -1.28176  
P 1.80625 -0.01421 0.04900  
C 2.73060 -1.51345 0.85399  
C 3.30726 -1.05995 2.21463  
C 3.02580 1.32151 -0.72982  
C 2.16415 2.57152 -1.00184  
C 4.16553 1.67626 0.24054  
C 3.57273 0.77959 -2.06634  
C -3.50244 1.98316 1.16042  
C -0.76263 2.32368 2.01042  
C 1.67199 -2.60757 1.10905

C 3.84040 -2.07356 -0.05770  
 H 0.74667 -1.44625 -2.16906  
 H 0.25123 0.09836 0.65750  
 H 1.74200 2.99619 -0.07530  
 H 1.34248 2.35549 -1.70696  
 H 2.79463 3.35115 -1.46691  
 H 4.75712 2.50363 -0.19318  
 H 4.85690 0.83415 0.40127  
 H 3.79142 2.01601 1.22093  
 H 2.76418 0.52734 -2.77307  
 H 4.20589 -0.11035 -1.93812  
 H 4.19449 1.56305 -2.53873  
 H 3.76823 -1.93060 2.71567  
 H 2.51938 -0.67026 2.88130  
 H 4.08577 -0.28905 2.11491  
 H 1.22896 -2.98554 0.17217  
 H 0.86462 -2.24020 1.76367  
 H 2.15673 -3.45992 1.61915  
 H 3.45822 -2.36222 -1.05084  
 H 4.26305 -2.98082 0.41234  
 H 4.67350 -1.36553 -0.19292  
 H -1.88779 4.09753 -0.21163  
 H -2.26967 2.93818 -1.53469  
 H -0.57006 3.20450 -1.04462  
 H -3.62016 3.00419 1.55899  
 H -3.72648 1.25887 1.95754  
 H -4.20683 1.83658 0.32828  
 H 0.31205 2.25703 1.78367  
 H -0.97901 1.66459 2.86575  
 H -1.02519 3.36193 2.27048  
 H -0.40003 0.27408 -1.64712

TS (11''-6) <sub>3CpPh</sub>  
 SCF Energy = -926.852428890  
 Enthalpy 0K = -926.454111  
 Enthalpy 298K = -926.425628  
 Free Energy 298K =  
 SCF(DCM) = -926.902589913  
 SCF(BP86-D3) = -0.06825966  
 Lowest Frequencies = -686.0495  
 24.4978 cm<sup>-1</sup>  
 C -2.50865 2.34719 -0.61912  
 C -1.71735 1.62906 0.30448  
 C -1.27649 2.25797 1.48916  
 C -1.62222 3.59505 1.74447  
 C -2.40670 4.30708 0.82160  
 C -2.85080 3.68245 -0.35646  
 P -1.27822 -0.13902 -0.01872  
 C -2.88972 -1.04531 -0.21914  
 C -3.94595 -0.84571 0.69679  
 C -5.12146 -1.59998 0.57552  
 C -5.24580 -2.55776 -0.44650  
 C -4.19286 -2.76220 -1.35346  
 C -3.01064 -2.01475 -1.23820  
 B -0.04521 0.00186 -1.53023  
 Rh 1.77548 0.02238 -0.49466  
 P 1.97246 -1.91434 0.81455  
 C 1.74496 -1.70714 2.64742  
 C 3.16970 1.38276 0.57588  
 C 2.17412 2.16676 -0.11403  
 C 2.37620 1.94844 -1.52137

C 3.57635 1.14959 -1.69549  
 C 4.06584 0.80841 -0.42002  
 H 3.31501 1.35335 1.65637  
 H 1.39928 2.78217 0.34254  
 H 1.78961 2.39444 -2.32489  
 H 3.99268 0.83568 -2.65320  
 H 4.94713 0.20241 -0.20982  
 C 0.78370 -3.26850 0.36987  
 C 3.63367 -2.74208 0.68162  
 H -0.33954 0.41259 -2.62149  
 H 0.21270 -0.23019 0.65582  
 H 0.89987 -4.11939 1.06032  
 H 0.98490 -3.60064 -0.66014  
 H -0.25002 -2.89201 0.43189  
 H 3.64176 -3.67307 1.27234  
 H 4.41371 -2.06573 1.06310  
 H 3.84689 -2.97394 -0.37293  
 H 0.72751 -1.33797 2.84816  
 H 2.47143 -0.97179 3.02547  
 H 1.89578 -2.66836 3.16521  
 H 0.97960 -0.92148 -1.66867  
 H -3.85692 -0.09478 1.48894  
 H -5.94418 -1.43802 1.27901  
 H -6.16573 -3.14349 -0.53686  
 H -4.29251 -3.50101 -2.15491  
 H -2.19453 -2.17245 -1.95310  
 H -0.67807 1.69838 2.21618  
 H -1.28940 4.07588 2.66980  
 H -2.67815 5.34779 1.02387  
 H -3.46589 4.23529 -1.07324  
 H -2.86249 1.86223 -1.53463

TS (11''-6) <sub>3CpMe</sub>  
 SCF Energy = -543.387067649  
 Enthalpy 0K = -543.092183  
 Enthalpy 298K = -543.070241  
 Free Energy 298K =  
 SCF(DCM) = -543.441026466  
 SCF(BP86-D3) = -0.04570253  
 Lowest Frequencies = -722.3922  
 22.3409 cm<sup>-1</sup>  
 C -2.29711 -1.92475 -0.91414  
 C -2.81398 -1.02534 0.03927  
 C -1.98756 -1.11323 1.23477  
 C -1.01508 -2.16004 1.03287  
 C -1.15389 -2.60166 -0.32919  
 Rh -0.49092 -0.43596 -0.26583  
 B 1.31726 -0.93949 -1.20027  
 P 2.58260 -0.17011 0.07702  
 C 4.25815 0.47425 -0.52065  
 H -3.66804 -0.36257 -0.09873  
 H -2.16758 -0.59261 2.17585  
 H -0.32053 -2.54649 1.77775  
 H -0.57302 -3.39036 -0.80777  
 H -2.66045 -2.06658 -1.93253  
 P -0.63307 1.88032 0.09021  
 C -0.35261 2.48498 1.82536  
 C 0.55472 2.88261 -0.92461  
 C -2.28983 2.59683 -0.35598  
 C 3.06142 -1.62000 1.14922  
 H 1.57475 -1.80654 -1.99344

|   |          |          |          |
|---|----------|----------|----------|
| H | 1.11201  | 0.26281  | 0.64164  |
| H | 0.44021  | 3.95473  | -0.69755 |
| H | 0.35896  | 2.70827  | -1.99357 |
| H | 1.58614  | 2.57442  | -0.69031 |
| H | -2.27521 | 3.69185  | -0.22883 |
| H | -3.06466 | 2.16769  | 0.29723  |
| H | -2.52679 | 2.35141  | -1.40234 |
| H | 0.65638  | 2.19323  | 2.15513  |
| H | -1.09233 | 2.02679  | 2.49959  |
| H | -0.45084 | 3.58193  | 1.86966  |
| H | 0.33594  | -0.12402 | -1.72728 |
| H | 3.71048  | -1.26285 | 1.96406  |
| H | 2.15634  | -2.07081 | 1.58064  |
| H | 3.60134  | -2.37569 | 0.55787  |
| H | 4.85406  | 0.80650  | 0.34348  |
| H | 4.78348  | -0.33929 | -1.04819 |
| H | 4.10628  | 1.31875  | -1.20853 |

TS (11''-6)<sub>3</sub><sub>cpCy</sub>

SCF Energy = -934.109409085  
 Enthalpy 0K = -933.574982  
 Enthalpy 298K = -933.544069  
 Free Energy 298K =  
 SCF(DCM) = -934.158699590  
 SCF(BP86-D3) = -0.08924740  
 Lowest Frequencies = -666.7399  
 28.8019 cm-1

|    |          |          |          |
|----|----------|----------|----------|
| C  | -2.30151 | 2.46624  | -0.85611 |
| C  | -1.57843 | 1.77223  | 0.32038  |
| C  | -2.40026 | 1.86313  | 1.62830  |
| C  | -2.74198 | 3.33157  | 1.96300  |
| C  | -3.46901 | 4.02321  | 0.79534  |
| C  | -2.64967 | 3.93002  | -0.50452 |
| P  | -1.08265 | -0.02867 | -0.03800 |
| C  | -2.73746 | -0.98221 | -0.34029 |
| C  | -3.13250 | -1.82699 | 0.88993  |
| C  | -4.45751 | -2.57898 | 0.63684  |
| C  | -4.38248 | -3.44076 | -0.63712 |
| C  | -3.97776 | -2.59689 | -1.86005 |
| C  | -2.65082 | -1.84374 | -1.61729 |
| B  | 0.19246  | 0.13459  | -1.51351 |
| Rh | 2.00941  | 0.13066  | -0.44895 |
| P  | 2.20202  | -1.78213 | 0.88846  |
| C  | 3.89109  | -2.56155 | 0.84184  |
| C  | 4.32097  | 0.85099  | -0.43702 |
| C  | 3.48077  | 1.43190  | 0.60106  |
| C  | 2.48786  | 2.26226  | -0.03655 |
| C  | 2.62961  | 2.06764  | -1.45407 |
| C  | 3.79294  | 1.23066  | -1.68655 |
| H  | 5.18759  | 0.21075  | -0.27301 |
| H  | 3.66264  | 1.37891  | 1.67491  |
| H  | 1.77330  | 2.91395  | 0.46469  |
| H  | 2.03556  | 2.55258  | -2.22884 |
| H  | 4.16152  | 0.92112  | -2.66502 |
| C  | 1.88428  | -1.56024 | 2.70562  |
| C  | 1.07665  | -3.17312 | 0.40120  |
| H  | -0.03372 | 0.55718  | -2.61752 |
| H  | 0.44353  | -0.11675 | 0.62886  |
| H  | 1.17744  | -4.01424 | 1.10579  |
| H  | 1.33454  | -3.50829 | -0.61505 |
| H  | 0.03507  | -2.81372 | 0.40929  |

|   |          |          |          |
|---|----------|----------|----------|
| H | 3.89812  | -3.48539 | 1.44360  |
| H | 4.63405  | -1.85965 | 1.25043  |
| H | 4.15760  | -2.79840 | -0.19933 |
| H | 0.85552  | -1.19764 | 2.85291  |
| H | 2.58548  | -0.81418 | 3.11026  |
| H | 2.02037  | -2.51487 | 3.23949  |
| H | 1.20391  | -0.80763 | -1.61819 |
| H | -3.49268 | -0.18537 | -0.49114 |
| H | -2.33071 | -2.56459 | 1.09640  |
| H | -3.21501 | -1.19328 | 1.79098  |
| H | -4.70235 | -3.20171 | 1.51548  |
| H | -5.27847 | -1.84230 | 0.53657  |
| H | -3.64008 | -4.25006 | -0.48865 |
| H | -5.35153 | -3.93682 | -0.82002 |
| H | -3.88177 | -3.23193 | -2.75858 |
| H | -4.77524 | -1.86069 | -2.08032 |
| H | -1.83161 | -2.58338 | -1.50622 |
| H | -2.39906 | -1.21752 | -2.49189 |
| H | -0.60482 | 2.27552  | 0.48370  |
| H | -3.34391 | 1.29506  | 1.51018  |
| H | -1.84902 | 1.39580  | 2.46468  |
| H | -3.35612 | 3.36584  | 2.88020  |
| H | -1.80615 | 3.87904  | 2.19197  |
| H | -4.45530 | 3.54240  | 0.64206  |
| H | -3.67238 | 5.07934  | 1.04417  |
| H | -3.19908 | 4.38885  | -1.34536 |
| H | -1.71181 | 4.50927  | -0.39006 |
| H | -3.23888 | 1.92367  | -1.08838 |
| H | -1.68167 | 2.42618  | -1.76932 |

6<sub>cpTBu</sub>

SCF Energy = -779.306922868  
 Enthalpy 0K = -778.840665  
 Enthalpy 298K = -778.811237  
 Free Energy 298K = -778.895683  
 SCF(DCM) = -779.359296311  
 SCF(BP86-D3) = -0.09014571  
 Lowest Frequencies = 18.3694  
 50.0929 cm-1

|    |          |          |          |
|----|----------|----------|----------|
| C  | 0.95118  | -1.80664 | 1.80219  |
| C  | 2.25679  | -1.69822 | 1.21536  |
| C  | 2.26688  | -2.40652 | -0.04620 |
| C  | 0.95611  | -2.94662 | -0.24159 |
| C  | 0.14793  | -2.58131 | 0.88587  |
| Rh | 0.80876  | -0.63075 | -0.11492 |
| P  | 2.35642  | 1.14792  | -0.22488 |
| C  | 2.17073  | 2.56243  | -1.42040 |
| H  | 3.11495  | -1.20987 | 1.67839  |
| H  | 3.12210  | -2.53623 | -0.70827 |
| H  | 0.62560  | -3.52604 | -1.10411 |
| H  | -0.88523 | -2.87868 | 1.04903  |
| H  | 0.64399  | -1.42986 | 2.77666  |
| B  | -0.51323 | 0.37892  | -1.95712 |
| P  | -1.42777 | 0.29327  | -0.27367 |
| C  | -1.91906 | 1.97867  | 0.57019  |
| C  | -0.64184 | 2.62076  | 1.13635  |
| C  | -2.93772 | -0.94383 | -0.34383 |
| C  | -2.58402 | -2.13164 | -1.26556 |
| C  | -3.37417 | -1.47096 | 1.04151  |
| C  | -4.11096 | -0.17974 | -1.01030 |
| C  | 2.85361  | 1.97317  | 1.37049  |

C 3.98650 0.46621 -0.82916  
 C -2.52493 2.90715 -0.50945  
 C -2.90481 1.78683 1.74149  
 H -0.12134 1.47321 -2.26564  
 H 0.69276 -0.32451 -1.77211  
 H -1.74472 -2.73642 -0.89453  
 H -2.34490 -1.80540 -2.28839  
 H -3.46667 -2.79361 -1.32018  
 H -4.17072 -2.22329 0.89921  
 H -3.78477 -0.68515 1.69052  
 H -2.55597 -1.96146 1.59226  
 H -3.83322 0.21485 -2.00144  
 H -4.49468 0.64679 -0.39359  
 H -4.94650 -0.88862 -1.15601  
 H -0.89997 3.60108 1.57651  
 H 0.10611 2.79991 0.35134  
 H -0.18982 1.99683 1.92417  
 H -3.45598 2.50919 -0.93987  
 H -1.81842 3.08844 -1.33497  
 H -2.76499 3.88151 -0.04529  
 H -3.89163 1.42232 1.42079  
 H -3.06717 2.76918 2.22096  
 H -2.50752 1.10617 2.51242  
 H 3.05098 3.21623 -1.30607  
 H 1.25727 3.14609 -1.24586  
 H 2.13956 2.16362 -2.44499  
 H 3.72713 2.62081 1.18922  
 H 3.11942 1.21128 2.11889  
 H 2.02685 2.57970 1.76440  
 H 3.83657 -0.00081 -1.81457  
 H 4.38054 -0.28743 -0.13196  
 H 4.72007 1.28382 -0.92214  
 H -0.93090 -0.35109 -2.82152

${}^6\text{CpPh}$   
 SCF Energy = -926.928422361  
 Enthalpy 0K = -926.523779  
 Enthalpy 298K = -926.496025  
 Free Energy 298K = -926.580035  
 SCF(DCM) = -926.979867055  
 SCF(BP86-D3) = -0.07700940  
 Lowest Frequencies = 32.8435  
 43.5042 cm<sup>-1</sup>  
 C -1.39996 2.90785 -1.18127  
 C -1.11153 1.96544 -0.16909  
 C -1.04299 2.38387 1.17874  
 C -1.26297 3.73081 1.50897  
 C -1.54471 4.66607 0.49837  
 C -1.61239 4.25457 -0.84285  
 P -0.88553 0.20133 -0.63992  
 C -2.44889 -0.68349 -0.22905  
 C -3.26985 -0.26652 0.84111  
 C -4.46051 -0.95456 1.12099  
 C -4.84058 -2.05863 0.34112  
 C -4.03044 -2.47107 -0.73091  
 C -2.83941 -1.78907 -1.01973  
 Rh 1.10996 -0.96182 -0.18148  
 B 0.01196 -0.25156 -2.27224  
 C 2.07267 -2.04919 1.52162  
 C 2.48355 -2.72702 0.31056  
 C 1.29899 -3.24605 -0.30800

C 0.16776 -2.90830 0.50975  
 C 0.64711 -2.17400 1.65726  
 H 2.73744 -1.57299 2.24334  
 H 3.50351 -2.84216 -0.05371  
 H 1.25837 -3.78302 -1.25648  
 H -0.87107 -3.16748 0.30717  
 H 0.04346 -1.80749 2.48666  
 P 2.53509 0.87654 -0.02183  
 C 4.31057 0.36136 -0.23832  
 C 2.36735 2.24530 -1.25931  
 C 2.54309 1.75658 1.61397  
 H 0.44237 0.70310 -2.86970  
 H 1.26299 -0.73696 -1.85859  
 H 3.14818 2.99810 -1.06341  
 H 1.37590 2.71426 -1.17960  
 H 2.49164 1.83935 -2.27412  
 H 3.32325 2.53573 1.61722  
 H 2.74095 1.03949 2.42517  
 H 1.56012 2.22253 1.77615  
 H 4.42953 -0.12613 -1.21798  
 H 4.59936 -0.34831 0.55179  
 H 4.96865 1.24440 -0.18643  
 H -0.45830 -1.17708 -2.88232  
 H -2.99631 0.60522 1.44249  
 H -5.09489 -0.62027 1.94775  
 H -5.77213 -2.58943 0.55983  
 H -4.33324 -3.31723 -1.35560  
 H -2.22582 -2.09639 -1.87204  
 H -0.82063 1.65622 1.96723  
 H -1.21537 4.04972 2.55499  
 H -1.71392 5.71571 0.75739  
 H -1.83591 4.98077 -1.63049  
 H -1.46078 2.58826 -2.22637

${}^6\text{CpMe}$   
 SCF Energy = -543.461710266  
 Enthalpy 0K = -543.161595  
 Enthalpy 298K = -543.140118  
 Free Energy 298K = -543.208892  
 SCF(DCM) = -543.519295299  
 SCF(BP86-D3) = -0.05091069  
 Lowest Frequencies = 42.3511  
 48.5364 cm<sup>-1</sup>  
 C -1.46914 -1.62444 1.27225  
 C -0.12497 -2.12364 1.26120  
 C 0.13183 -2.69882 -0.05046  
 C -1.04156 -2.51907 -0.83998  
 C -2.03069 -1.84074 -0.03947  
 Rh -0.24921 -0.45011 -0.21767  
 P 1.93708 0.32110 0.04772  
 C 2.36280 1.02426 1.71593  
 P -1.31555 1.62763 -0.09098  
 B -0.95787 1.20441 -1.92036  
 C -0.58878 3.12468 0.72836  
 C -3.06964 1.58210 0.50576  
 C 3.20106 -1.02834 -0.15802  
 C 2.53046 1.59599 -1.16206  
 H 0.55225 -2.14247 2.11530  
 H 1.04475 -3.20150 -0.36667  
 H -1.16398 -2.81573 -1.88228  
 H -3.04168 -1.59103 -0.36014

|   |          |          |          |
|---|----------|----------|----------|
| H | -1.97334 | -1.16868 | 2.12402  |
| H | -0.13003 | 1.90527  | -2.44729 |
| H | -0.12046 | 0.07095  | -1.82684 |
| H | 3.56564  | 1.88370  | -0.91677 |
| H | 1.88700  | 2.48675  | -1.14343 |
| H | 2.49581  | 1.16988  | -2.17625 |
| H | 3.42970  | 1.30011  | 1.74922  |
| H | 2.15753  | 0.27079  | 2.49192  |
| H | 1.74940  | 1.91386  | 1.91954  |
| H | 3.09025  | -1.48689 | -1.15228 |
| H | 3.06144  | -1.79919 | 0.61494  |
| H | 4.21452  | -0.60492 | -0.06258 |
| H | -1.91530 | 0.80776  | -2.53309 |
| H | -3.54204 | 2.55370  | 0.28586  |
| H | -3.61475 | 0.79433  | -0.03301 |
| H | -3.11628 | 1.39679  | 1.58999  |
| H | -1.19614 | 4.00138  | 0.44765  |
| H | -0.60247 | 3.01516  | 1.82420  |
| H | 0.44081  | 3.29022  | 0.38237  |

6<sub>срCy</sub>

SCF Energy = -934.176911457  
 Enthalpy 0K = -933.636568  
 Enthalpy 298K = -933.606023  
 Free Energy 298K = -933.695757  
 SCF(DCM) = -934.228570614  
 SCF(BP86-D3) = -0.09859793  
 Lowest Frequencies = 20.1534  
 33.2447 cm<sup>-1</sup>

|    |          |          |          |
|----|----------|----------|----------|
| C  | 1.25853  | -2.16512 | 1.64783  |
| C  | 2.63833  | -1.92535 | 1.32798  |
| C  | 2.93540  | -2.54447 | 0.05460  |
| C  | 1.72612  | -3.15494 | -0.41391 |
| C  | 0.69560  | -2.92735 | 0.55684  |
| Rh | 1.38233  | -0.88355 | -0.20768 |
| P  | 2.71303  | 1.02932  | -0.12515 |
| C  | 2.99497  | 1.75612  | 1.56428  |
| P  | -0.78828 | 0.03723  | -0.53993 |
| B  | 0.11101  | -0.18836 | -2.21739 |
| C  | -1.50611 | 1.68644  | 0.07565  |
| C  | -2.18175 | -1.21623 | -0.31030 |
| C  | 4.44226  | 0.64019  | -0.69515 |
| C  | 2.29758  | 2.48664  | -1.19518 |
| H  | 3.35472  | -1.41247 | 1.97050  |
| H  | 3.90442  | -2.57459 | -0.44188 |
| H  | 1.60251  | -3.68336 | -1.35997 |
| H  | -0.32437 | -3.30344 | 0.49973  |
| H  | 0.75138  | -1.87417 | 2.56672  |
| H  | 0.44414  | 0.81723  | -2.79291 |
| H  | 1.41122  | -0.60847 | -1.87708 |
| H  | 3.09028  | 3.24537  | -1.08941 |
| H  | 1.33257  | 2.92557  | -0.90538 |
| H  | 2.23579  | 2.15924  | -2.24342 |
| H  | 3.61526  | 2.66411  | 1.48613  |
| H  | 3.51537  | 1.02104  | 2.19708  |
| H  | 2.03144  | 2.00296  | 2.03111  |
| H  | 4.40719  | 0.26657  | -1.72991 |
| H  | 4.88997  | -0.13186 | -0.05153 |
| H  | 5.06548  | 1.54883  | -0.65500 |
| H  | -0.28750 | -1.13916 | -2.84450 |
| C  | -3.39757 | -0.84303 | -1.19903 |

|   |          |          |          |
|---|----------|----------|----------|
| H | -1.74391 | -2.14772 | -0.71804 |
| C | -4.50386 | -1.91642 | -1.08624 |
| H | -3.81289 | 0.13190  | -0.87673 |
| H | -3.07983 | -0.72879 | -2.25019 |
| C | -4.92796 | -2.14551 | 0.37526  |
| H | -5.36944 | -1.61136 | -1.70017 |
| H | -4.13260 | -2.86609 | -1.51861 |
| C | -3.71851 | -2.50936 | 1.25599  |
| H | -5.40266 | -1.22533 | 0.76916  |
| H | -5.69231 | -2.93983 | 0.43164  |
| C | -2.60565 | -1.44251 | 1.15728  |
| H | -4.02484 | -2.62783 | 2.31024  |
| H | -3.31329 | -3.48974 | 0.93475  |
| H | -2.98410 | -0.49260 | 1.58398  |
| H | -1.73500 | -1.73217 | 1.77330  |
| C | -1.75326 | 2.68299  | -1.08224 |
| H | -2.49444 | 1.36279  | 0.45896  |
| C | -2.49108 | 3.93910  | -0.56696 |
| H | -0.78698 | 2.97691  | -1.53400 |
| H | -2.33432 | 2.20102  | -1.88787 |
| C | -1.75248 | 4.59737  | 0.61204  |
| H | -2.61675 | 4.65541  | -1.39785 |
| H | -3.51160 | 3.65204  | -0.24579 |
| C | -1.51474 | 3.59196  | 1.75415  |
| H | -0.77771 | 4.99203  | 0.26173  |
| H | -2.32374 | 5.46623  | 0.98213  |
| C | -0.75776 | 2.34203  | 1.25359  |
| H | -0.94987 | 4.06284  | 2.57824  |
| H | -2.48809 | 3.28004  | 2.18057  |
| H | 0.25066  | 2.65106  | 0.92145  |
| H | -0.61586 | 1.61341  | 2.07233  |
